# Supplementary material
Source: HighWire-hosted journal article supplement (doi:10.1101/rna.064006.117)
Supplement: Supplemental_Material.docx [file Supplemental_Material.docx]

**SUPPLEMENTARY DATA**

1. Complete list of mass spectrometry data

2. Supplementary material and methods

3. Fig. S1 DENV4 RNA interacts with QKI in infected cells

Total RNA was isolated from immunoprecipitated materials and was analyzed by RT-qPCR using primers specific for indicated RNAs. Each point represents one biological replicate. Statistical significance was determined using a two-tailed *t* test: , p˂0.05;  p˂0.01; , p˂0.001. Error bars indicate S.E.M.

4. Fig. S2 Effects of QKI silencing on the replication of DENV4 and DENV2 viruses

(A)(B)(C)(D) HuH7 cells were transfected with non-targeting control siRNA (NTC) or siRNAs targeting QKI (siQKI-1 and siQKI-2) and, 48 hours later, cells were infected with wild type DENV4 viruses at MOI=0.5 or DENV2 viruses at MOI=10. Twenty-four hours post-DENV4 infection and 48 hours post-DENV2 infection, supernatants were collected and viral titer was determined by focus formation assay. Cells were harvested for total RNA extraction and levels of viral RNA accumulation were measured by RT-qPCR using primers that amplify a region in the middle of the viral coding sequence (gRNA). Each point represents one biological replicate. Statistical significance was determined using a two-tailed *t* test: , p˂0.05; , p˂0.01; , p˂0.001. Error bars indicate S.E.M.

5. Fig. S3 Functional characterization of QRE in DENV 3*ʹ* UTR

(A)(B) HuH7 cells were infected with wild type DENV4 viruses(DENV4-WT) or mutant DENV4 viruses(DENV4-mut8) at MOI=0.5. Twenty-four hours post-infection, supernatants were collected and titer was measured by focus formation assay. Total RNA was isolated from infected cells and analyzed by RT-qPCR using primers that amplify a region in the middle of the viral coding sequence (gRNA). (C)(D), HuH7 cells were infected with wild type DENV2 viruses(DENV2-WT) or mutant DENV2 viruses(DENV2-mut1) at MOI=10. Two days post-infection, samples were collected and analyzed as described above. (E) HuH7 cells were infected with DENV2 WT or mut1 viruses at MOI=10. Supernatants were harvested at 1h, 48h and 96h post infection and titer was measured by focus formation assay. Each point represents one biological replicate. Statistical significance was determined using a two-tailed *t* test: , p˂0.01; , p˂0.001. Error bars indicate S.E.M.

Fig. S4 Effects of QRE in DENV4 3*ʹ* UTR on relative translation efficiency

(A) Plasmids containing R Luc sequences and indicated DENV4 3*ʹ* UTR sequences were co-transfected with F Luc plasmids into HuH7 cells. One day after transfection, cells were lysed and luciferase activity was measured using Dual Luciferase Reporter Assay. (B) HuH7 cells were co-transfected with indicated R Luc reporter plasmids with F Luc plasmids. Approximately 24 hours after transfection, total RNA was isolated from transfected cells and was analyzed by RT-qPCR using primers that are specific for R Luc or F Luc. (C) To measure the relative translation efficiency, the normalized relative luciferase activity was divided by the normalized relative abundance of RNA level. Each experiment, in biological triplicates, was repeated two times. Data are presented both in bar graphs (left) and in scatter plots (right). In the scatter plot, each point represents one biological replicate. Statistical significance was determined using a two-tailed t test: , p˂0.05; , p˂0.01. Error bars indicate S.E.M.

**Supplementary methods**

Plasmids. Firefly luciferase gene (F Luc) was amplified using forward primer 5ʹ - CGC GCT AGC ATG GAA GAC GCC AAA AAC - 3ʹ and reverse primer 5ʹ - CGC GGA TCC TTA CAA TTT GGA CTT TCC GCC -3ʹ. The PCR product was digested with NheI and BamHI sites and then ligated into pcDNA3 plasmids. Renilla luciferase gene (R Luc) was amplified using forward primer 5ʹ - CGC GCT AGC ATG ACT TCG AAA GTT TAT G - 3ʹ and reverse primer 5ʹ - CGC GGA TCC TTA TTG TTC ATT TTT GAG - 3ʹ. The PCR product was digested with NheI and BamHI and then ligated into pcDNA3 plasmids to generate pcDNA3-R Luc construct. To make R Luc reporter plasmids, various DENV 3ʹ UTR fragments were amplified as described in the main materials and methods section. The PCR products were digested with BamHI and XhoI and then ligated into pcDNA3-R Luc plasmids.

Reporter assays. HuH-7 cells were seeded at 1x104 cells per well in 96-well plates the day before transfection. Cells were co-transfected with 50ng indicated R Luc reporter plasmids and 10ng F Luc plasmids using Lipofectamine 3000 (Invitrogen). Approximately 24 hours after transfection, transfected cells were lysed and the luciferase activity was measured using Dual Luciferase Reporter Assay (Promega) according to manufacturer’s protocol with a Spark microplate reader (Tecan). To evaluate the reporter expression at the transcriptional level, 250ng indicated R Luc reporter plasmids and 50ng F Luc plasmids were co-transfected into HuH7 cells seeded in 24-well plates. One day after transfection, total RNA was isolated and analyzed by RT-qPCR.
