# Supplementary material
Source: HighWire-hosted journal article supplement (doi:10.1101/rna.064006.117)
Supplement: Supplemental_Table_S1.xlsx [file Supplemental_Table_S1.xlsx]

## Sheet: Compiled DENV1 and 3
Gene names	DENV1 Ratio Rep#1	DENV1 Ratio Rep#2	DENV3 Ratio Rep#1	DENV3 Ratio Rep#2
LIN28B	2.1544	2.3256	2.1298	3.0585
DDX6	1.9908	1.7912	1.4593	1.8639
SART3	1.5002	1.6865	1.3951	1.7243
RBM3	1.0928	0.95579	1.1773	0.85464
SERBP1	1.1859	0.89263	1.1767	1.4153
HNRNPA1;HNRNPA1L2	1.118	1.0361	1.1671	1.0648
SSRP1	1.0669	1.0133	1.1644	1.2294
FLNC	1.0732	1.1527	1.1472	1.0816
PFN2	1.115	0.93394	1.1401	0.91608
CPSF1	1.329	1.3754	1.1346	1.131
HNRNPA2B1	1.146	1.196	1.1329	1.2218
EEF2	1.0762	1.2169	1.1226	1.5642
EIF3K	0.98105	0.84662	1.1168	1.0539
HDLBP	1.1428	1.787	1.1164	2.2423
EEF1E1;hCG_2043275	1.2667	1.1343	1.1149	1.2183
COPB1	1.0751	1.0314	1.1141	1.3353
PA2G4	1.0641	1.1525	1.1093	1.2946
HSPE1	1.027	1.0948	1.1066	1.0875
HSP90AA1	1.0855	1.1513	1.1013	1.0863
CCT6A	1.0606	1.1646	1.101	1.1025
CCT3	1.0327	0.98631	1.0991	1.2763
CSDE1	1.5502	2.7685	1.0977	1.3637
SRSF7	1.1222	1.0877	1.0969	1.1968
CSTB	1.0322	1.1795	1.0944	1.0993
PRDX1	1.0359	1.0085	1.0922	0.96716
EIF3D	1.0327	0.91719	1.0914	0.91204
PFN1	1.0172	1.0702	1.0909	1.1015
MARS	1.1512	1.2359	1.0908	1.1233
SUPT16H	1.0046	1.0887	1.0873	1.182
NQO1	1.0704	1.1002	1.0862	1.1127
HNRNPA3	1.0356	1.234	1.0862	1.3157
SLIRP	0.97424	0.93846	1.0851	0.88729
PSMD2	1.0534	1.0869	1.0832	1.0102
EIF3H;EIF3S3	1.0823	0.89919	1.0828	1.0749
PRDX2	1.1293	1.0753	1.0822	1.1058
DKFZp686J1372;TPM3	1.1757	1.2296	1.0813	1.5727
STRAP	1.5318	2.5006	1.0811	1.5241
HNRNPL	1.2303	1.5231	1.08	1.3049
AIMP1	1.258	1.3857	1.0789	1.0695
TLN1	1.0026	1.1632	1.0787	1.043
LARS	1.1711	1.4945	1.0786	1.3461
LDHA	1.0754	1.2211	1.0777	1.1363
MYL6	1.1379	0.97384	1.077	1.0248
SLC25A3	1.0477	1.0159	1.0768	0.9622
GSTP1	0.89725	1.1242	1.0765	1.1705
LGALS1	1.0412	1.0516	1.0764	0.99358
ALDOA	0.98421	1.115	1.0749	1.071
HSPD1	0.97381	0.94651	1.0694	1.013
NAA38	1.1567	1.2637	1.0692	1.3386
HSP90AB1	1.0256	1.0373	1.0675	1.0324
CCT8	1.0626	1.2765	1.0665	1.1572
EEF1D	1.1494	1.2269	1.0628	1.2642
ALDH1A1	0.92811	1.0579	1.0621	1.0881
PSMB2	1.1271	1.2141	1.0615	1.1444
HNRNPA0	1.0101	1.0631	1.0595	1.499
SND1	1.0362	1.0821	1.0575	0.9954
U2AF1;U2AF1L4	1.3333	1.265	1.0572	1.2841
PDIA3	0.91413	1.2729	1.0563	1.2038
IARS	1.1029	1.1956	1.056	1.2184
PPIA	0.98346	1.249	1.0557	1.1188
TUBB	0.97924	0.85973	1.0557	0.93444
MIF	0.95621	1.0989	1.054	1.0222
FLNA	1.0188	1.0711	1.0539	1.0115
NACA	1.0065	1.076	1.0532	1.157
PKM	0.9649	1.0585	1.0525	0.9759
DDT;DDTL	1.163	1.285	1.0512	1.1848
AARS	0.99859	1.0397	1.0497	1.0552
PABPN1	1.1332	1.1753	1.0487	1.3214
HSP90B1	0.96744	1.0683	1.0484	1.0474
SRP19	1.7238	1.4536	1.048	1.1849
NSUN2	1.096	1.7247	1.047	1.5813
EPRS	1.113	1.2146	1.0458	1.1345
TXN	0.8715	0.79054	1.0453	0.81783
FLNB	1.0583	1.2364	1.0452	1.026
TOP2B	0.91225	1.2291	1.0451	1.3442
HNRNPK	0.96184	0.83351	1.0444	1.0213
SUPT4H1	1.0787	0.96309	1.0399	0.89486
GAPDH	0.99399	1.181	1.0375	1.0366
EIF3M	1.0677	0.72561	1.0361	0.89437
GANAB	0.94738	1.0554	1.0352	0.89827
VCP	1.0196	0.94693	1.0344	0.99716
USP10	2.3833	3.5106	1.032	0.89943
LSM6	1.0669	1.2248	1.0301	1.2275
UGDH	0.89818	0.84688	1.0292	0.92525
TROVE2	1.2703	2.2423	1.0287	1.9499
P4HB	0.98937	1.0404	1.0258	1.1066
HSPA8	1.0461	0.95714	1.0253	1.0208
DARS	1.0899	1.1043	1.0224	1.1711
VARS	0.88849	0.90276	1.0222	0.9872
ERH	1.0109	1.0814	1.0221	1.1805
PDIA4	0.90148	1.1893	1.0196	0.94191
EIF3I	1.0809	0.84899	1.0191	1.012
CCT7	1.0215	1.0304	1.0191	0.89897
XRCC6	0.99848	1.0327	1.0186	0.99423
SRP14	1.3935	1.2721	1.0178	1.177
G3BP1	1.3231	1.619	1.0162	1.0198
QARS	1.1529	1.1563	1.016	1.1065
COPA	0.97062	1.0897	1.0157	1.1198
DDX23	0.99679	0.87901	1.0152	0.96734
HSP90AB2P	0.99747	0.933	1.0147	0.95854
RARS	1.0965	1.1855	1.0146	1.1427
IQGAP1	0.99748	1.1896	1.0136	1.1454
DYNC1H1	1.0327	1.0824	1.0132	1.0265
ENO1	0.91606	1.0694	1.0126	1.0117
FASN	0.90337	1.0424	1.0125	0.94422
HSPA9	0.99102	0.98316	1.0121	1.0117
NAP1L1	1.0105	0.80677	1.0119	0.86145
AKR1B10	0.95884	1.2776	1.0118	1.2538
ATP5A1	1.0359	1.0744	1.01	1.0454
HSPA5	1.0022	0.9828	1.0099	0.97969
EIF3B	1.0418	0.78842	1.0096	0.86922
SRP9	1.4879	1.2407	1.008	1.064
ACTN4	1.0143	1.1248	1.0077	1.0406
XRCC5	0.96255	0.92863	1.0068	1.0688
EIF5B	1.0704	1.0038	1.0057	0.95423
EEF1G	1.0846	1.0314	1.0055	1.1201
TPI1	0.96341	1.0317	1.0054	0.98097
NHP2L1	1.1782	1.2772	1.0037	1.1652
HNRNPAB	1.2987	1.4013	1.0031	0.98567
CALR	0.91458	1.0721	1.0025	1.0835
HUWE1	0.9212	0.81134	0.9991	0.7876
SRSF6	0.98804	0.90901	0.99744	1.0666
KARS	1.1229	1.1096	0.99524	1.1388
FABP5	0.94298	0.76806	0.99414	0.94684
MRPL54	0.98265	0.77376	0.99302	0.87597
ATP5B	0.99284	0.94147	0.9918	0.93676
U2AF2	1.1115	1.1807	0.99136	0.98401
PTBP1	0.97287	0.98256	0.99041	0.80952
GPI	0.98475	1.2079	0.98961	1.1707
KRT8	1.1519	1.2947	0.98954	1.1196
EIF3E	0.9599	0.73504	0.98795	1.0246
EIF3L	0.93948	0.7755	0.98761	0.95684
SNRPE	1.0727	1.0224	0.98514	1.0196
NCBP1	1.1127	0.95542	0.98285	1.1404
CAPRIN1	2.7832	4.5701	0.98259	0.79994
RUVBL1	1.0545	0.93481	0.98231	1.0261
SLC25A5	1.021	0.81965	0.98117	0.97127
KPNA2	1.1482	1.1774	0.98086	0.94898
SFPQ	1.0318	0.88823	0.9803	0.59007
HSD17B10	1.0981	1.4284	0.97851	1.3145
EIF3A	0.97597	0.80753	0.97783	0.89064
SNRPD1	1.0406	1.0264	0.97748	0.98106
HNRNPU	0.95946	0.98059	0.97204	0.97114
SRSF1	1.0077	1.0801	0.9709	0.97666
AHNAK	0.90569	1.0001	0.97065	0.97756
SURF2	1.551	1.4634	0.97059	1.268
SET	0.91	0.87245	0.96603	0.96741
COPG1	1.0094	0.88618	0.96473	1.0888
MCM4	0.95716	0.70461	0.96321	0.86566
KPNA4	1.0601	1.163	0.96291	1.177
MRPL53	0.91739	0.91817	0.96236	0.98628
CLTC	0.95375	1.0173	0.96208	1.0315
KRT18	1.1577	1.1109	0.96178	1.0053
ANP32A	0.89694	0.90887	0.95743	0.95359
C1QBP	0.9455	0.96006	0.95683	0.93199
EIF3F	0.94028	0.7522	0.95679	0.94419
EIF3C;EIF3CL	1.0148	0.77648	0.95498	0.95802
MYH9	1.0176	1	0.95432	0.80668
HNRNPD	0.95037	1.0386	0.95173	0.85388
SPTAN1	0.99314	0.77965	0.94489	1.0017
SNRPF	1.0528	0.94392	0.94376	0.9463
PRPF19	0.98087	0.8304	0.94279	0.92453
SRSF3	1.0367	1.2052	0.94169	0.9569
DHX36	0.88434	0.7501	0.94145	0.83714
SF3B2	1.0079	0.87405	0.93787	0.85283
AP3D1	1.025	1.3104	0.93624	1.2095
SRSF2	0.99877	1.2056	0.93609	1.0925
EFTUD2	1.0126	0.92042	0.93548	0.97878
AP3B1	0.97721	1.1046	0.93412	1.1197
TPR	0.97294	0.91197	0.93386	0.87412
PPM1G	0.87694	0.77408	0.93196	0.97895
SUB1	0.9771	1.0988	0.93099	1.1343
SNRPN;SNRPB	0.95475	0.93514	0.92846	0.89577
SRP72	1.2028	1.1462	0.92696	1.1203
SRSF5	0.9199	1.2326	0.9267	1.1113
LMNA	1.1402	1.1299	0.92637	0.98879
ANP32B	0.88808	0.85717	0.92634	0.98122
SNRNP200	0.94586	0.94053	0.92607	0.82889
PHF5A	1.0659	1.1506	0.92482	0.95734
HNRPDL	1.0565	1.1862	0.92464	0.8359
EPB41L2	0.96793	1.2261	0.92301	1.1673
SNRPD2	1.0103	0.96134	0.92296	0.96656
MRPL55	0.92424	1.2226	0.92248	1.0009
SPTBN1	0.96632	1.0122	0.91999	0.9456
AIMP2	1.1554	0.9855	0.91938	0.94202
EIF3G	0.99504	0.68294	0.91871	0.90694
CTR9	0.91652	0.88158	0.91722	0.96469
SRP54	1.1503	1.0815	0.91672	1.0634
PRPF8	0.92064	0.94656	0.91317	0.86202
FBL	1.0011	1.0373	0.91284	1.1858
RPL39P5;RPL39	0.71079	0.67808	0.9125	0.95682
SNRPD3	1.0315	0.9546	0.91231	0.98013
ANP32E	0.82335	0.91336	0.91226	1.0922
SRRM2	1.4568	1.8073	0.90774	1.3193
SRP68	1.1835	1.0399	0.90296	1.0577
NARS2	1.0221	1.0313	0.89969	1.0971
PABPC1;PABPC3	1.0164	0.7592	0.89927	0.99562
SNRPB2	1.0483	1.0062	0.89895	0.97584
POLR2A	0.90762	0.90278	0.89825	0.71464
LARP1	0.84355	0.88902	0.89614	1.0746
DDB1	0.91052	1.0276	0.89581	1.0658
SUPT5H	0.94703	0.81365	0.89215	0.86193
HNRNPUL1	1.0248	0.95645	0.89039	1.0975
TRNT1	0.88159	0.92995	0.89003	0.99269
NOP56	0.89353	0.97218	0.88981	0.85774
ANXA2;ANXA2P2	0.78929	1.1203	0.88812	1.2573
EIF6	0.75584	0.85924	0.88805	1.3689
MYBBP1A	0.89272	0.88214	0.88451	0.91946
VIL1	1.0182	0.91258	0.88445	0.96635
PRPF4	0.97909	0.89616	0.87996	1.0922
DDX5	0.96831	1.0165	0.87974	0.9136
SNRPG	0.97392	0.99212	0.8766	0.99767
RPL38	0.75351	0.90728	0.87615	1.0228
PPP6R3	0.85078	0.82946	0.87484	1.32
NPM1	0.88769	0.86584	0.87398	0.88883
PM20D2	0.82947	0.96631	0.87137	1.1564
NCL	0.92115	0.94421	0.86936	0.90237
SNRNP70	0.88677	0.87911	0.86923	0.87615
RPLP2	0.87442	0.84662	0.86847	1.0471
SNRPA1	1.0049	0.97349	0.86748	0.96416
CPNE8;CPNE5;CPNE2;CPNE3;CPNE9;CPNE4;CPNE6;CPNE7	0.77578	0.67054	0.86615	1.0937
DHX15	0.97934	1.0312	0.8626	0.94585
OLA1	1.0155	1.0344	0.85823	0.9898
PTRH2	1.0013	0.9902	0.85755	1.0584
SNRPA	1.055	1.0117	0.85393	1.1048
SF3B3	0.9995	1.1321	0.85086	0.88189
SSB	1.0836	0.95762	0.85045	0.91725
RPS27L	0.90153	0.94678	0.84641	1.1669
HNRNPC;HNRNPCL1;LOC649330;LOC440563	0.94911	0.98347	0.84166	0.94469
RPL24	0.7763	0.83966	0.83604	0.84199
TCOF1	0.91693	1.0754	0.83598	1.0083
KATNAL2	0.84117	0.92912	0.83375	0.92945
TUFM	0.96458	0.99998	0.83362	1.0313
RPS27	0.94639	0.92324	0.83254	1.0713
MATR3	0.86335	0.74828	0.83045	0.69769
HIST1H1C;HIST1H1E;HIST1H1D	0.71304	0.65523	0.82933	0.97282
SYNCRIP	1.0964	1.2261	0.82884	0.96223
HDGFRP2	0.92066	1.0663	0.82857	0.98236
NOLC1	1.1782	1.2667	0.82128	1.1794
RTCA	1.0295	1.2716	0.82019	1.0676
RPL5	1.1998	1.0505	0.819	0.9579
DDX21	0.97094	0.98304	0.81501	1.2599
ZC3HAV1	1.0713	1.0073	0.81417	0.79837
SRPK2	0.92795	1.1011	0.81072	1.0598
TOP1	0.96942	0.91358	0.80961	0.90291
RPLP0;RPLP0P6	0.82465	0.90957	0.80727	1.0207
HIST1H1A	0.81799	0.71287	0.79619	0.95436
RPL30	0.78326	0.83437	0.79421	0.90076
IGF2BP2	1.5901	1.4925	0.79284	0.83146
DHX30	0.90101	1.0751	0.79165	1.0595
RPS29	0.92963	0.80728	0.78718	0.85296
NES	0.93428	0.68087	0.77847	0.78628
G3BP2	3.8302	7.8771	0.7717	0.79429
HNRNPR;HNRPR	1.386	1.5911	0.77162	0.99416
ZNF622	0.73387	0.8475	0.76958	1.4837
IGF2BP1	0.99904	0.71963	0.75811	0.75934
RPL14	0.62966	0.61623	0.75785	0.92447
ZFR	1.9542	2.5274	0.75224	1.0799
RPS14	0.82712	1.0781	0.75215	0.99657
RPL8	0.68034	0.61675	0.7488	0.90698
RPL13A;RPL13a	0.7081	0.61153	0.74585	0.83984
RPS12	0.92797	0.82448	0.74532	0.82894
RPL27A	0.74975	0.70533	0.74361	0.95273
RPL9	0.7577	0.918	0.73917	1.002
RPS15A	0.8242	0.82699	0.73643	0.95862
RPS21	0.93186	0.8473	0.73462	0.85015
RPS9	0.83103	1.1168	0.73391	1.0388
RPS25	0.94891	0.76011	0.73321	0.73288
RPS19	0.92498	0.72778	0.73083	0.78836
RPL18	0.649	0.60667	0.7292	0.96243
IGF2BP3	0.92842	0.79268	0.72907	0.68052
RPS18	0.90537	0.80589	0.72827	0.82988
RPL31	0.75393	0.74818	0.72789	1.0037
FAU	0.79265	0.84614	0.72472	1.0065
RPL23A	0.84482	0.94308	0.72081	1.0281
RPS10	0.87612	0.74213	0.72026	0.84146
RPL22	0.84086	0.83678	0.71993	0.85509
RPS28	0.92279	0.72774	0.71302	0.75393
HIST1H4A	0.80939	0.9426	0.71248	1.0101
RPS16	0.88013	0.81205	0.71223	0.78863
RPS2	0.87421	0.80939	0.70886	0.76016
RPL7A	0.65754	0.75568	0.70855	0.90458
RPL13	0.70946	0.68529	0.70636	0.8358
RPL11	0.90709	1.0429	0.70535	0.95768
RPL7	0.64063	0.53745	0.70125	0.89999
RPS8	0.7815	0.75135	0.69946	0.87192
RPS20	0.89282	0.76601	0.69797	0.75995
RPS3	0.87805	0.83418	0.69395	0.84596
RPS3A	0.78435	0.81223	0.69232	0.86227
RPS13	0.75652	0.71643	0.68627	0.85275
RPSA	0.8632	0.83313	0.6833	0.81527
RPL4	0.62265	0.83213	0.67439	0.87945
GNB2L1	0.86831	0.89126	0.67189	0.98854
RPS5	0.86303	0.75907	0.6703	0.86346
RPS7	0.8238	0.85453	0.665	0.9246
RPL3	0.65688	0.75546	0.65905	0.95217
YBX1	0.81991	0.6662	0.62227	0.7179
RPS6	0.79654	0.77478	0.61736	1.0206
STRBP	1.2196	1.2082	0.47298	0.7845
STAU1	0.62252	0.53365	0.45216	0.59685
ADAR	0.55932	0.60377	0.40971	0.52346
ILF2	0.88819	1.0192	0.37112	0.4664
DHX9	0.57262	0.52548	0.35379	0.32809
ILF3	0.74534	0.75047	0.32513	0.39135
EIF2AK2	0.74046	0.54681	0.12137	0.14981
KRT2	0.095483	0.10461	0.078021	0.35908
KRT10	0.061305	0.063477	0.049744	0.055035
KRT9	0.066597	0.13995	0.030704	0.052639
KRT1	0.030231	0.043888	0.029926	0.11086

## Sheet: Compiled DENV2 and 4
Gene names	DENV2 Ratio Rep#1	DENV2 Ratio Rep#2	DENV4 Ratio Rep#1	DENV4 Ratio Rep#2
EIF2AK2	0.23935	0.27575	0.31759	0.461467
RPL26L1	0.8607	0.3917	0.50005	0.502361
RPS15	0.82418	0.41742	0.52346	0.451937
STRBP	0.79334	0.42645	0.71685	0.698617
RPSA	0.77034	0.44818	0.5474	0.452407
RPS10;RPS10P5	0.84176	0.44948	0.57386	0.473575
RPS5	0.83964	0.45582	0.55521	0.434953
DHX9	0.61112	0.46283	0.67741	0.613911
RPS4X	0.65583	0.46317	0.49225	0.508932
RPS16	0.89298	0.46842	0.57643	0.410576
RPS2	0.79263	0.46879	0.57296	0.464425
RPS19	0.86565	0.47542	0.56233	0.427497
RPL18A	0.56029	0.47681	0.3359	0.406785
RPL6	0.53229	0.47792	0.36148	0.369072
RPS3	0.82544	0.47905	0.55943	0.442576
RPS18	0.83856	0.48173	0.56295	0.445375
TPT1	0.96973	0.48236	0.95277	0.783883
RPS25	0.87698	0.48996	0.56737	0.445633
RPS20	0.8333	0.49309	0.54681	0.479916
RPS21	0.87241	0.4953	0.57944	0.468165
RPS28	0.84155	0.49725	0.55536	0.472255
RPS8	0.67478	0.49776	0.45878	0.491449
RPL36	0.49125	0.50339	0.37736	0.332005
RPL7	0.50823	0.50727	0.34214	0.372079
RPS13	0.66816	0.50755	0.45541	0.437503
RPL7A	0.47972	0.5077	0.29757	0.320646
RPS12	0.89648	0.50941	0.55875	0.43554
EIF4H	1.0993	0.51112	0.98853	0.968898
GNB2L1	0.84572	0.51188	0.59163	0.496894
RPL18	0.58946	0.51378	0.38116	0.348238
RPS15A	0.73683	0.51603	0.54396	0.475014
RPS29	0.80326	0.5218	0.57441	0.421265
KRT9	0.10674	0.52269	0.049795	10.6114
RPL4	0.46189	0.52374	0.33192	0.430904
PDLIM1	0.87557	0.53091	1.2042	1.00097
RALY	0.68747	0.5344	0.70059	0.874049
RPL10A	0.69858	0.53544	0.42233	0.356214
RPL12	0.53761	0.5355	0.3491	0.350693
RPL14	0.58933	0.53628	0.38443	0.219578
RPL8	0.56186	0.53646	0.34414	0.325383
RPS23	0.75786	0.54222	0.54963	0.523423
RPS17;RPS17L	0.90063	0.54458	0.56761	0.490653
RPS3A	0.77139	0.54765	0.55259	0.545316
LYAR	0.68154	0.54825	0.50144	0.420062
MMS19	0.77031	0.54886	0.55072	0.5003
RPL13A;RPL13a	0.5775	0.55257	0.41889	0.426094
RPS14	0.73411	0.55603	0.54487	0.515331
CPOX	0.88244	0.56273	0.8087	0.80289
RPL34	0.58173	0.56339	0.36004	0.438924
RPL21	0.59572	0.56375	0.35875	0.4649
RPL13	0.5396	0.56375	0.36921	0.380561
RPL28	0.58165	0.56841	0.40283	0.494242
ILF3	0.63486	0.56892	0.66313	0.642508
RPL35A	0.5912	0.57157	0.41402	0.384039
RPS9	0.75331	0.57404	0.5337	0.518296
RPS11	0.75563	0.57796	0.5347	0.565867
RPS24	0.76547	0.5858	0.57065	0.579811
RPL15	0.49055	0.59718	0.3493	0.355657
RPL27	0.62198	0.59767	0.43804	0.428266
SNX3	0.8206	0.5977	1.0531	0.757404
IDE	0.94208	0.60516	1.1481	0.781494
PSMF1	0.89749	0.60608	0.98425	0.878735
MCM5	0.91607	0.60949	1.1656	0.797957
RAB10	1.1318	0.61203	0.93147	0.662208
UBA6	1.1324	0.61561	0.96429	0.924898
EIF5	0.84022	0.61647	0.93062	0.980969
PGM1	0.88173	0.61685	0.86715	0.871764
RPL3	0.7044	0.62299	0.59247	0.694252
RPL30	0.67737	0.62458	0.46233	0.483395
FBXO22	1.0663	0.62706	1.0114	1.20137
FEN1	1.1065	0.62787	0.94155	0.888336
ILF2	0.83317	0.62917	0.70997	0.698129
ADI1	1.0097	0.63321	0.90729	0.906454
RPS26;RPS26P11	0.80187	0.63432	0.55433	0.580114
RPL35	0.62774	0.64037	0.44306	0.585309
RPL26;KRBA2	0.67764	0.64375	0.48137	0.556886
RPS27	0.85143	0.64484	0.56319	0.568569
JUP	0.87523	0.65164	0.91861	1.13237
COMMD3	0.91166	0.65169	0.99421	1.05491
RPS7	0.88713	0.65265	0.71695	0.63674
REXO2	1.1846	0.65332	1.0801	0.856018
RPL37A	0.61732	0.66035	0.36927	0.467486
G6PD	0.91479	0.66194	0.92588	0.905715
CTPS2	0.9406	0.66206	1.1327	0.779545
MYH9	0.90701	0.66776	0.96261	1.007
FAU	0.71618	0.66787	0.50826	0.458526
CAB39	0.93442	0.66824	0.87351	0.948137
ARHGAP5	1.0227	0.66904	0.99692	0.890155
SCARB2	1.035	0.67163	1.0263	0.935279
PAFAH1B3	0.82503	0.67222	0.93444	0.841893
PGK1	0.8438	0.6725	0.96647	0.89222
TRIM23	0.87398	0.67372	1.1965	0.809717
UBA1	0.92832	0.67453	0.97866	0.894214
RPL27A	0.64193	0.67636	0.42735	0.438982
CA2	0.9677	0.67643	0.98404	0.824878
RPL10;RPL10L	0.63553	0.67721	0.57759	0.507331
PDCD6IP	0.9202	0.67727	0.98688	0.856825
AKR1B1	1.2115	0.67745	1.0757	0.827472
RPL19	0.6657	0.67786	0.47055	0.564016
STAU1	0.73171	0.67984	0.72665	0.70373
PROM1	1.0245	0.68018	0.92159	0.694589
RPL32	0.59432	0.68094	0.41375	0.7122
VCL	0.91996	0.68353	1.0348	0.858664
GOT2	0.89623	0.68514	1.0148	0.998104
ARPC3	1.1144	0.68541	1.0781	0.742721
ARF5	1.0314	0.68644	1.0675	0.775134
TOMM70A	1.0439	0.68969	1.0343	1.03107
HNRNPM	0.93703	0.69056	1.0927	0.90876
NAMPT	1.3082	0.69339	1.0204	0.801539
LONP1	1.0768	0.69422	0.95708	0.911328
PTBP1	0.91578	0.69816	0.889	0.891504
BPNT1	0.72177	0.6998	1.0357	0.748447
MYH10	0.93948	0.70024	0.9039	1.04156
CMPK1	1.0086	0.70236	1.044	0.867679
TBCB	0.90676	0.70252	1.1477	1.08644
SRXN1	1.1113	0.7033	1.0715	0.745712
GMPS	0.87115	0.70508	0.92129	0.858443
CS	0.89274	0.70549	0.94365	0.965904
LAMP1	0.90765	0.70591	0.9457	0.901551
PFAS	0.93234	0.70595	0.82794	0.922424
PON2	1.0214	0.70646	0.96154	0.941354
GSTM2	0.97779	0.7069	0.84421	0.833959
PTRHD1	1.3261	0.70704	0.99731	0.785423
OSBP	0.85234	0.70725	1.1034	0.835073
PPIG	0.87234	0.70797	0.60617	0.691994
AKR1C1	1.0118	0.70903	0.99548	0.835911
GPI	0.88771	0.71065	0.91802	0.910996
MRPS28	1.9023	0.71116	1.0818	0.851861
MPST	1.1763	0.71193	1.14	1.00372
PEBP1	0.96981	0.71214	0.93866	0.851209
PEPD	0.86309	0.7123	1.1042	0.913242
GSR	0.90515	0.7124	0.98018	0.927386
ERO1L	0.9302	0.71457	0.83682	0.767813
USP5	0.85868	0.71747	1.0662	0.87943
MEPCE	1.8078	0.71802	1.2758	0.755915
CNN2	0.99623	0.72337	0.9517	0.912992
BZW1	1.0918	0.72548	0.98183	0.798085
GDI2	0.86446	0.72616	0.96794	0.908183
TOP2A	0.89739	0.72663	0.93309	0.903424
PDIA3	0.89157	0.72696	0.98609	0.942329
PLEC	0.736	0.72721	0.8025	1.25403
CLIP1	0.96656	0.72899	1.1015	1.06789
RPL31	0.74053	0.73023	0.48052	0.628575
LACTB2	0.86876	0.73052	1.0655	0.938438
RPL36AL	1.2974	0.73075	0.53337	0.382088
NPEPPS	0.94865	0.73154	0.95142	0.94688
CYP51A1	0.86236	0.73366	0.87003	0.964692
CHMP4B	1.0726	0.73425	0.95621	1.13705
XPO5	1.2197	0.73591	1.0648	0.85778
RPL17	0.85505	0.73622	0.63051	0.96367
GMFB	0.91801	0.73646	0.97772	0.854555
TAGLN2	0.98109	0.73788	1.0059	0.906454
UBE2L3	0.9845	0.73806	0.97461	0.914077
GSTM3	0.91162	0.73927	0.93467	0.841043
MYH14	0.75605	0.73934	0.84246	1.09617
GRHPR	0.90268	0.73962	0.85688	0.908926
IDI1	0.9023	0.73995	0.89425	0.881679
CPD	1.0229	0.74187	1.1636	1.01959
PMPCA	0.81492	0.74367	0.87363	0.87858
ANKFY1	0.70503	0.74409	1.1964	0.887626
YTHDF1	0.88775	0.7443	1.1085	1.08896
PHAX	1.1667	0.74484	1.1048	1.20237
RANBP2;RGPD1;RGPD2;RGPD4;RGPD3	0.7333	0.74693	0.99727	0.785546
GSS	0.8497	0.74849	1.004	0.948947
FH	0.99328	0.74874	1.0097	1.03024
ACAA1	0.91578	0.74936	1.1126	0.996512
DICER1	0.78996	0.74938	0.88345	0.93362
UCHL3	0.88757	0.75131	1.0008	0.928678
A1CF;RBM47;RBM46	0.78704	0.75171	0.91758	0.914328
CNN3	0.99482	0.75329	0.98305	0.937998
RNH1	0.87059	0.75348	1.0189	0.937207
GOLGA4	0.97551	0.75653	0.94109	1.03109
PDLIM5	0.95212	0.75656	0.79597	0.853971
ENO1	0.8666	0.75722	0.95881	0.945895
CDK1	0.93114	0.75742	0.98871	0.870019
NUDC	0.92857	0.75767	0.98848	0.704077
PDCD11	0.7833	0.75799	0.83808	0.970591
DPP3	0.83173	0.75839	0.93577	0.965158
GLO1	0.88668	0.75873	0.84827	0.799424
PGD	0.84913	0.75975	0.95447	0.963298
MDH1	0.92069	0.75987	0.95594	0.817595
UNC45A	1.0701	0.7636	1.0565	0.913492
PSME2	1.0304	0.76511	1.0941	0.887626
PARVA	1.1429	0.76574	1.0669	0.85918
TXNRD1	0.87601	0.76586	0.99088	0.87535
OTUB1	1.0469	0.76607	1.0552	0.922679
ALDH2	0.94635	0.76614	0.9816	0.993049
PLS3	0.79374	0.76852	1.0223	0.972573
PPA2	0.89713	0.76887	0.91671	0.962001
CKB	0.76273	0.77007	0.96337	1.06977
RPL24	0.69157	0.77164	0.56669	0.580821
CYCS	0.95067	0.77175	0.95287	0.842318
ABRACL	0.79639	0.77217	0.97976	0.963855
HSPB11	0.86517	0.77293	0.9288	0.899766
EIF2A	0.89642	0.77314	0.96898	0.883704
EZR	0.98676	0.7733	1.0326	0.893495
ABCE1	0.93704	0.77614	0.96757	0.925754
SAR1A	1.0622	0.77731	1.0174	0.783638
IDH1	0.87792	0.7786	0.9634	0.975229
LAMP2	0.96057	0.78082	0.89376	0.995917
SERPINB1	0.81475	0.78104	0.96631	0.87146
SRM	1.029	0.7814	1.1192	0.785484
AHCYL1;AHCYL2	0.89969	0.78141	0.92444	0.929195
MSN	1.1055	0.78221	1.0851	0.862738
TKT	0.84367	0.78259	1.0276	0.985999
IDH2	0.88541	0.7843	0.87649	0.974374
RAB1B;RAB1A;RAB1C	1.0348	0.78457	1.0004	0.886446
HTATIP2	0.97834	0.78606	0.99936	0.895496
TRMT6	1.5784	0.78618	1.1498	1.08191
PARK7	0.96567	0.78656	1.0555	0.934579
PTPLAD1	1.1452	0.78677	0.9824	0.859476
EIF4A3	0.85595	0.78684	0.81358	0.849762
VPS35	0.98009	0.78785	1.038	0.900009
FKBP4	1.1291	0.78829	1.2947	0.917431
FABP1	0.83156	0.78872	0.88548	0.935541
FNTA	0.88104	0.78913	0.94886	0.848176
DDX39A;DDX39B	0.8712	0.78934	0.94751	1.06076
ATIC	0.99134	0.78981	1.067	0.966931
PABPC1	1.2445	0.79034	1.0265	0.796876
DBI	1.1774	0.79129	1.0149	0.844452
ATP6V1A	0.83277	0.7918	0.76516	1.15999
BLVRA	1.0619	0.79204	0.99895	0.820412
EEF2	1.013	0.79278	0.97431	0.853534
FN1	0.71036	0.79379	0.80747	1.24508
DUT	0.82548	0.79477	1.0055	0.750582
EIF4G2	0.98349	0.79557	1.1091	0.899119
EHD3;EHD1	1.2562	0.79582	1.2757	0.979336
SURF4	1.0489	0.7961	1.0148	0.892538
RPS6	1.1203	0.79622	0.98469	0.772618
TXNDC5	0.97057	0.79649	0.95677	0.965437
ARF1;ARF3	1.024	0.79719	0.98482	0.961631
VAT1	0.89408	0.79981	0.87805	0.985222
DRAP1	0.93624	0.80017	0.99161	0.927902
RHOA	1.0279	0.80023	1.107	0.93668
RAB3GAP2	1.2078	0.80104	1.0333	0.840901
MTHFD1	0.82339	0.80143	0.95398	0.912159
TOP1	1.0548	0.80189	0.9209	0.909422
EIF6	0.71842	0.80263	0.60858	0.627707
SH3BGRL3	0.8887	0.80291	1.0694	0.878889
LAMB1	1.0278	0.80332	0.99601	0.951928
GOT1	0.89742	0.80406	0.87518	0.923105
CROCC	0.80225	0.80503	0.97532	0.885347
DDX18	0.99309	0.80511	1.0056	0.97012
TMEM33	1.0526	0.80646	0.96191	0.77688
PGAM1	0.97692	0.80681	0.96588	0.906947
CORO1C	0.8455	0.80776	0.80154	0.874814
CCDC47	1.0292	0.80828	0.97286	1.12722
HYOU1	1.0088	0.8087	0.97459	0.948047
ANXA3	1.1405	0.8089	1.1857	0.909422
HGD	1.0009	0.8096	0.99093	0.98561
WDR1	0.89882	0.8098	0.99041	1.01558
ACTR3	0.86763	0.81004	0.94983	1.03866
ME1	0.99998	0.81044	1.0169	0.856604
ALDOC	0.9717	0.81069	0.91017	0.931099
FTH1	1.3441	0.81078	1.1565	0.812678
TLN1	0.93061	0.81103	1.0384	0.901876
AHSA1	1.009	0.81121	1.0303	0.950841
LRPPRC	0.8025	0.81155	0.9045	0.850774
RPL9	0.78151	0.81204	0.56228	0.710833
ADSS	0.89774	0.8127	1.116	0.987654
AKR1B10	0.94313	0.81282	1.013	0.911826
CFL2	1.1298	0.81291	1.0207	0.832501
ZC3H15	0.88484	0.81308	0.79907	0.935891
ARHGDIA	0.97595	0.81571	1.0118	0.884486
AHCY	0.89982	0.81592	1.0138	0.960523
EIF4A2	1.0056	0.81612	1.0618	0.804441
RPL29	0.77075	0.81625	0.63315	0.942685
KRT10	0.7752	0.81688	0.73013	1.22793
ARPC5L	1.2378	0.81829	1.2716	0.915835
AP2B1	1.0474	0.8186	0.84751	0.912825
GLRX3	0.95243	0.81908	0.98874	0.885504
	1.0112	0.81974	1.0345	0.959877
ETF1	0.93319	0.81975	1.0201	0.914746
HSPA4	0.92078	0.82051	1.1976	0.939144
GCLM	0.89564	0.821	0.98236	0.996016
CALR	0.91599	0.82146	0.92797	0.970026
MTTP	0.90624	0.82211	0.93398	0.948767
HDGF	0.94733	0.82304	0.9435	0.950661
COMT	0.86314	0.82315	1.0838	0.925926
RPL23	0.68225	0.8233	0.53296	0.593613
ZMPSTE24	0.97104	0.8236	0.97772	0.866326
LAP3	0.92687	0.82392	0.97019	0.889601
NT5C2	1.0085	0.82437	1.0151	0.770357
USP14	0.77318	0.82506	0.89853	0.782595
S100A11	0.98744	0.82531	0.93139	0.925583
NARS	0.9328	0.82616	1.0854	1.00817
EIF4A1	0.87196	0.82853	1.0068	0.974564
ERP29	1.0677	0.82973	1.004	0.910332
PRKRA	1.0516	0.83023	0.91643	0.678288
HARS	1.1192	0.83073	0.90571	1.04043
CLIC1	0.95432	0.83165	0.97878	0.912326
SLC9A3R1	0.83289	0.83177	0.88824	0.9081
CALU	1.1133	0.83181	1.1876	0.931359
MANF	0.97579	0.83207	0.99881	1.08286
KPNB1	1.0131	0.83226	1.0724	0.899604
MCTS1	1.0106	0.83307	0.9798	0.930492
YWHAQ	1.0965	0.83353	0.96256	0.814531
LDHB	0.94467	0.83398	0.93851	0.901144
PRDX6	0.92755	0.83404	0.95101	0.916842
DNAJB1	0.89708	0.8343	0.92722	1.03624
SMCHD1	0.98935	0.83458	1.078	0.976658
AARS	0.96533	0.83468	1.025	0.93932
PC	0.96032	0.83538	0.9527	0.970497
TRMT1L	0.92929	0.83574	0.81325	0.743937
AKR1C2	1.0705	0.83579	1.0781	0.895496
DEK	1.2752	0.83605	1.0851	1.19244
IARS2	0.808	0.83621	0.92669	0.913325
NUDT5	0.79359	0.83839	0.89031	0.884017
AP1G1	0.97317	0.84012	1.069	0.990099
RPL38	0.67901	0.84074	0.56615	0.536711
TOMM34	1.0725	0.841	1.0132	1.00112
CTNNB1	0.93713	0.84236	0.99333	1.01263
MRPS27	1.425	0.84248	0.95268	0.650111
PKM	0.91007	0.84256	0.97847	0.965158
PLD3	1.0507	0.84263	1.4935	1.06142
ISG15	0.94331	0.84263	1.0608	0.967773
TXNDC17	0.96214	0.84289	0.97132	0.912242
RAD23B	1.0059	0.84301	0.93121	1.04299
FKBP3	1.0403	0.84324	0.9578	0.788457
DNMT1	1.0834	0.84332	1.2881	1.03262
MTCH2	0.76734	0.84379	0.74415	1.04759
EIF2S3;EIF2S3L	1.0048	0.84385	0.96955	0.948677
HNRNPC;HNRNPCL1;LOC649330;LOC440563	0.79167	0.84394	0.74732	0.948497
SOD1	1.0331	0.8446	0.97655	0.849907
DPYSL2	0.97911	0.84478	0.98428	0.934405
TARS	1.1027	0.84511	1.1203	0.956206
SOD2	0.94379	0.84564	0.9684	1.00025
ITGB5	1.1745	0.84597	0.98618	0.920217
CDC42	0.97315	0.84777	0.95425	0.861401
MDH2	0.893	0.84823	0.94579	0.939585
ATL3	0.93957	0.84845	0.99647	0.913325
PABPC4	1.4775	0.84863	1.1921	0.822774
SERPINH1	0.87122	0.84929	0.90378	0.990099
CFL1	0.99601	0.84953	1.0347	0.957763
ITGB1	0.75291	0.84994	0.90199	1.084
HNRNPK	0.94823	0.85083	1.0012	0.973899
UGGT1	1.0339	0.85135	0.93977	0.924984
DSTN	1.0157	0.85165	1.0347	0.934492
ALDH1A1	0.88696	0.85252	0.9943	0.993246
PFKM	1.0311	0.85288	0.97593	0.929541
SCRN1	0.81922	0.85307	0.95365	0.74162
PUF60	1.1274	0.85309	0.90426	0.690226
UGP2	0.83035	0.85419	0.9492	0.874202
CARHSP1	1.0183	0.85426	1.0732	0.834794
CBR1	0.92414	0.85449	0.96665	0.84868
CCS	0.95435	0.85452	0.91182	1.12036
EGFR	1.0357	0.85484	1.017	0.947777
ARPC2	1.124	0.85528	1.0136	0.965251
UBQLN1;UBQLN4	1.1335	0.85549	1.1171	0.758495
VIM	0.89275	0.85602	0.86185	1.20385
MTPN	0.91958	0.85658	0.8946	0.885661
NQO1	1.002	0.85678	1.0125	0.915583
UFM1	0.959	0.85694	0.98646	0.982318
BLVRB	0.91306	0.85795	1.0587	0.944376
ETFB	0.97067	0.8582	0.89653	0.958497
AP1B1	1.0204	0.85833	1.0384	0.911826
UCHL1	0.92811	0.8584	1.002	0.910747
NAA15	0.98484	0.85964	0.80191	0.797703
ACTA1;ACTC1;ACTG2;ACTA2;ACTB	1.1101	0.86008	1.0028	0.997805
SRPRB	1.0104	0.86027	1.0301	0.920217
PHPT1	1.0001	0.86045	0.95581	1.08283
STIP1	0.90822	0.86104	0.93777	0.981162
ACAT1	0.89194	0.8612	0.89124	1.00785
LARP1	1.1091	0.86128	0.90424	0.907194
IQGAP1	1.0819	0.86143	1.0288	0.891027
PRDX2	1.1302	0.86151	0.99587	0.870246
MRPS2	2.031	0.86164	1.2239	0.671276
KRT16	0.062892	0.86176	0.042497	1.29267
GGH	1.0193	0.86223	1.0263	0.928247
IPO5	0.9701	0.86234	1.0428	0.885112
TMEM43	1.0981	0.86344	0.92685	1.00891
STT3A	0.89612	0.86392	0.99265	0.8259
GARS	0.87832	0.86412	0.9286	0.922424
DBN1	1.2351	0.86436	1.0876	1.05321
SORD	1.0785	0.86541	0.99495	0.995124
TPI1	0.96321	0.86546	0.93696	0.923788
CTSD	0.98164	0.86555	0.96842	1.04816
HINT1	0.99391	0.86702	1.0129	0.890631
NME1	1.0354	0.86732	0.95322	0.910249
CCDC58	1.0185	0.8675	0.96168	1.01062
VPS13C	0.93816	0.8679	1.0456	0.93423
PAF1	0.87825	0.86821	0.92477	1.14746
CLIC4	1.0211	0.86838	0.82458	0.830772
CANX	0.92889	0.86865	1.0434	1.03243
YARS	0.8997	0.86942	0.85299	0.947598
PRMT1	0.83894	0.86972	0.92547	0.800384
UQCRC1	0.83402	0.87024	0.75825	1.01673
GSTO1	0.90792	0.87064	0.95263	0.972101
MOV10	1.512	0.87108	1.3416	0.81248
XRCC5	0.94632	0.87196	0.96957	0.931099
P4HB	1.0326	0.87223	0.92754	0.954654
AP2A2;AP2A1	0.89634	0.87319	1.0164	1.55821
RHOC	0.96679	0.87344	0.98867	0.890869
CTTN	0.92803	0.87362	0.96379	1.1157
GANAB	0.96382	0.87392	0.96905	1.00862
DDT;DDTL	1.0306	0.875	0.9365	0.93006
PPIA	0.94737	0.8753	1.0284	0.924813
PSPH	0.7778	0.87621	0.83873	0.924214
FABP5	0.97052	0.87641	1.0551	0.925241
FIS1	0.98076	0.87654	0.9095	0.962279
MRPS22	1.5237	0.87665	0.90402	0.644579
SLC3A2	0.97827	0.87722	1.0549	0.982415
NIPBL	0.8825	0.87732	1.0152	0.978282
ECHS1	1.01	0.87746	1.0616	0.961816
ANAPC4	0.89784	0.87757	0.80186	1.14012
VPS26A;VPS26B	0.74643	0.87801	0.91197	0.965531
DCTN1;DKFZp686E0752	1.0054	0.87842	1.0639	1.07662
ZC3H18	1.0245	0.87948	0.95757	0.85492
NONO	1.0118	0.88044	1.0873	0.913159
JAGN1	0.90345	0.88052	0.98737	0.931012
HSP90AA1	1.0075	0.88073	1.0466	0.927214
MRPS25	1.8822	0.88099	1.1973	0.684322
UBE2I	1.0479	0.88139	1.0664	0.921319
STMN2	0.94156	0.88259	0.99878	0.799297
KPNA1	1.148	0.88303	1.0215	1.03637
CAPZA1	1.0599	0.88308	1.0109	0.961723
ADH5	0.96041	0.8833	1.1105	0.993049
TRMT61A	1.0258	0.88375	1.1473	1.32679
APMAP	0.83539	0.88475	0.83933	1.02096
RDX	0.96011	0.88561	0.95172	1.05499
CSE1L	0.94196	0.88564	1.0624	0.873286
ETFA	0.97385	0.88594	0.9642	0.971062
TXNL1	0.89785	0.88639	0.9572	0.872981
RPL36A	0.79591	0.88708	0.5605	0.652061
UBE2D2;UBE2D3;UBE2D4;UBE2D1	0.85581	0.8875	0.99101	0.986096
PPA1	0.89107	0.88761	1.0988	0.939496
COIL	0.70538	0.88936	0.7657	0.827746
RAP1B;RAP1A	1.0002	0.89008	1.0834	0.984543
UBE2N;UBE2NL	0.99389	0.89109	0.98552	0.995124
PTCD3	1.5579	0.89114	0.9395	0.753523
ALDOA	0.97712	0.89122	0.98569	0.95338
API5	1.2055	0.89156	1.203	0.991768
HSD17B11	1.0105	0.89168	0.98049	1.01676
FAM213A	0.9574	0.89179	1.0811	0.927386
TMX2	0.78695	0.89314	0.91671	1.12183
ESD	0.88283	0.89358	1.0621	1.15002
JMJD6	1.0295	0.89361	0.6816	0.863632
DLD	0.9867	0.89435	0.9874	0.930579
SF3B3	1.0938	0.89548	0.94837	0.936856
POR	0.96489	0.89716	0.98975	1.3241
CHD1	1.1274	0.89754	0.92995	0.720617
PDIA4	0.85966	0.89757	0.8951	1.07727
TUBG1	0.89007	0.89838	0.90094	1.03162
SPTBN4	1.0763	0.90011	1.3749	0.902853
PFDN1	0.95565	0.90032	1.0877	0.922339
DDX1	1.0913	0.90077	1.0596	0.857045
NBAS	0.9011	0.90147	1.1722	0.73888
FTL	1.3244	0.90186	1.0005	0.856825
TRAP1	0.94351	0.90201	1.2847	1.29852
SRSF3	0.8455	0.90239	1.0505	1.36504
STK24	0.91667	0.90265	0.79036	0.861995
EEF1A1P5;EEF1A1;EEF1A2	0.99605	0.90276	1.029	0.990001
TF	0.75374	0.90307	0.78818	1.27196
CPNE1	0.95855	0.90356	0.81745	0.94518
RAB11A;RAB11B	1.0166	0.90385	0.98259	0.943218
PCBP2	0.89491	0.90494	1.0272	1.02394
VPS29	0.87273	0.90513	1.0089	1.00617
HSPD1	0.95765	0.9058	0.95574	0.987459
HSPH1	0.90964	0.90629	1.0309	0.882223
FLNB	1.0198	0.90638	1.0442	0.951928
ACTN1	1.072	0.90671	0.979	0.997606
PSMG1	0.75876	0.90685	0.92091	0.913409
TALDO1	0.92966	0.90691	0.96088	0.952472
CAPZA2	0.95157	0.90703	0.96926	1.00119
PSMD12	0.94514	0.90791	0.89763	1.01931
FARSA	0.90127	0.90805	1.006	0.830979
TUBB2A;TUBB2B	1.0275	0.90853	1.0274	1.1602
PSAT1	0.90447	0.9086	0.93729	0.986291
DNAJC13	0.87121	0.90882	0.93729	0.994926
SEC31A	1.083	0.90894	1.0025	0.968804
NUTF2	0.97883	0.90902	1.041	0.87222
EPB41L2	1.1656	0.90908	0.89923	1.24003
RPS27A;UBB;UBC;UBA52	0.89931	0.90917	0.91056	0.98174
ACTG1	1.1787	0.90946	1.0035	1.1086
RAB8B	1.0879	0.90972	1.1733	0.92885
CSTB	0.99282	0.90976	1.1052	0.894935
XRCC6	0.94066	0.90992	0.99377	1.03816
HMGB1	0.93674	0.91066	1.0096	1.04244
LMNA	0.98016	0.91161	0.83771	0.961723
RPS27L	0.97707	0.91169	0.56414	0.692425
MATR3	0.72914	0.91181	0.79999	0.805737
CERS6	0.78263	0.91187	0.82166	1.27881
PIR	0.83385	0.91193	0.96676	0.96609
HNRNPH1	0.94995	0.91195	0.99291	1.08582
CDC37	0.89578	0.91242	0.9606	1.02947
PRDX5	1.0101	0.91323	0.91688	1.00448
ANXA5	1.0009	0.91355	0.96627	0.892857
C19orf10	1.1925	0.91384	1.0233	0.893975
HARS2	0.94358	0.91386	0.78836	0.983574
TPP2	1.0157	0.91438	0.93521	1.27421
RSU1	1.1083	0.91444	0.92051	0.933184
DHX15	1.1547	0.91452	1.0024	0.846167
THOC2	2.8138	0.91516	2.4897	0.838434
PLOD1	1.0876	0.91594	1.1347	0.865052
ARF4	1.0635	0.91689	1.029	0.888257
SPTBN1	0.99886	0.91704	0.94163	1.07702
HSPA6;HSPA7	1.0384	0.91706	1.0238	0.947867
LDHA	0.9869	0.91718	0.99485	0.9243
ACAT2	0.87569	0.91745	0.93538	1.0314
NAP1L1	1.0258	0.91764	1.013	1.10481
RYR1	0.12312	0.91782	0.2912	1.43402
TTN	0.94127	0.91829	0.88747	1.07694
RAB5C	0.96881	0.9184	0.89695	0.948767
RPS6KA3	0.81989	0.91857	1.0241	0.879275
ARPC1B	0.96396	0.9187	1.1658	1.15816
PDIA6	0.97212	0.91909	0.95799	0.981932
PCBD1	1.0002	0.91912	1.1221	0.845666
PSME4	0.91569	0.91948	1.0077	0.899281
VAV2	0.95663	0.91961	0.96732	0.847027
CISD2	1.1843	0.92043	1.0546	0.869943
PROSC	1.254	0.92049	1.3604	0.901144
PARP1	1.0131	0.92063	0.9976	1.01538
	1.0703	0.92107	1.0549	0.918274
DKC1	1.2421	0.92127	0.9088	1.01455
RAB6B;RAB6A;RAB39A	0.96766	0.92148	0.90188	1.00692
2016-09-11	0.92572	0.9215	0.8647	0.938879
CARS	0.95623	0.92173	0.78555	1.02711
ZNF326	0.87132	0.92228	0.87365	1.04937
TROVE2	1.3078	0.92236	0.92204	0.819135
GAPDH	0.93791	0.92262	0.98477	1.00027
APEX1	0.92922	0.92297	0.97261	0.960615
UGDH	0.87115	0.92303	1.0196	1.0332
ST13;ST13P4;ST13P5	0.95868	0.92311	1.1561	1.01612
QPRT	0.96054	0.92341	1.0221	0.948767
SPTBN2	0.89363	0.92397	0.99309	1.17707
ERI1	1.0956	0.92421	0.94959	1.14732
UPF1	1.1763	0.9257	1.0947	0.981065
TRA2A	1.2395	0.9263	1.0431	1.18044
HRSP12	1.1595	0.92633	1.1649	0.964785
AIP	0.90688	0.92722	0.97556	0.949668
KDM1A	1.0692	0.92781	1.0885	0.987459
HSP90B1	0.94067	0.92784	1.0106	0.998602
IPO9	0.91491	0.92804	1.0015	1.04945
USO1	1.0034	0.92809	0.93075	1.01788
EIF1	0.97211	0.92809	0.94762	0.978857
SLC1A5	0.9402	0.92839	1.0903	1.04085
GSTP1	0.85381	0.9296	0.96579	1.04141
RAB2A	0.96965	0.92961	0.96354	0.943841
SON	0.97522	0.92963	0.67305	1.24459
HSP90AB1	0.94565	0.92998	1.0414	0.991572
QKI	0.61069	0.93154	7.6239	6.4914
DAP3	1.5504	0.93248	0.99069	0.79447
DDX3X;DDX3Y	0.91645	0.93259	0.97738	1
ATP1A1	0.97077	0.93322	1.0044	1.03152
TSN	1.1023	0.93354	1.033	0.862515
LMAN1	1.1446	0.93388	0.98933	1.1358
TPRG1L	1.383	0.93411	1.0377	1.08342
ACTB	1.0464	0.93548	1.029	1.0063
RPLP0;RPLP0P6	0.95877	0.93565	0.81835	0.866701
LRRC59	1.084	0.93575	1.0937	0.986972
HADHA	0.87379	0.93727	0.93954	1.12421
U2AF2	1.111	0.93737	0.90555	0.8364
NOP10	1.3594	0.938	0.94923	0.994036
HPRT1	0.91487	0.93905	1.0262	0.974184
TNPO3	1.0273	0.93919	0.97318	0.96432
CDKN2AIPNL	1.1794	0.93927	0.9299	0.863782
KIF5B	0.95081	0.93948	1.1396	1.00347
EIF5A;EIF5AL1	0.96931	0.93955	1.029	0.929195
SHMT2	0.78726	0.93981	0.94509	1.11107
HSPA8	1.0633	0.94001	1.0108	0.937559
RPL22	0.97968	0.94077	0.73349	0.881601
DRG1	1.0545	0.9409	1.039	0.924813
SCP2	1.0549	0.94154	1.0053	0.900333
ACTN4	0.99472	0.94261	1.0158	0.994926
TBCA	0.89765	0.943	0.93835	0.973047
HSD17B4	1.0857	0.94403	0.98112	0.878194
CACYBP	0.97365	0.94414	1.3085	1.00498
PRKAR2A	0.9511	0.94441	0.95708	0.906454
APRT	0.85908	0.94494	0.96336	0.973994
DNM1L	1.0626	0.945	1.0273	0.805802
FBXO2	1.0949	0.94512	0.97433	0.891424
GAK	1.0306	0.94524	1.0391	0.964041
CYB5A	1.0996	0.94636	1.0957	0.854774
MAGOHB;MAGOH	0.91522	0.94657	0.97145	1.03353
ASNS	0.82855	0.94702	0.85106	1.06056
NEB	0.91263	0.94709	0.92942	0.953289
PSME1	0.89303	0.94742	1.0886	0.89071
NSUN5	1.0588	0.94748	0.97082	1.00119
PAICS	0.95796	0.9478	1.0013	1.00662
SMS	0.93414	0.9478	0.94547	1.15896
YWHAE	1.0094	0.94784	1.0335	0.902039
PAFAH1B2	0.9737	0.94788	1.1788	0.903506
BCAT1	1.0279	0.9495	0.90008	0.914746
SDHA	1.0158	0.95011	0.98279	1.09446
SPR	1.0207	0.95184	1.1016	0.902772
DDB1	0.91452	0.95266	0.91025	1.0443
FDPS	0.80199	0.95272	1.0129	0.974659
BANF1	1.336	0.95316	1.1299	0.963391
DDRGK1	0.97301	0.95316	0.95304	0.975991
PPP2R1A	0.90688	0.95431	0.95547	0.945716
BID	0.89955	0.955	0.98504	0.84317
RAB21	0.97986	0.9553	1.0674	1.00485
TLN2	1.1909	0.95629	0.99536	1.01774
CYFIP1	1.0461	0.95683	1.0254	0.937559
ALB	0.09329	0.95884	0.12168	6.03064
MRPS11	1.6686	0.95898	0.9875	0.909753
HSP90AB2P	0.96854	0.959	1.0789	0.882301
MAN2A1	0.90908	0.9595	1.5067	1.1217
NME3	1.1968	0.95952	1.1618	1.16971
NRD1	0.82664	0.95953	1.026	1.19917
NAA50	1.0863	0.95988	0.85531	1.111
CUL1	1.0028	0.95988	0.99678	0.846955
VPRBP	1.1415	0.96052	0.99874	0.837731
ATP2B1;ATP2B4	0.99273	0.96127	1.0426	0.93791
HINT2	0.79498	0.96161	0.88613	1.09043
NCLN	1.108	0.96172	1.1973	1.07301
DNM2	0.96406	0.96249	1.0465	0.884095
EEA1	1.0654	0.96273	1.082	1.02834
SARS2	1.0371	0.96316	1.0849	1.10606
UBA2	0.92307	0.96342	0.95812	1.09886
AP2S1	1.0605	0.96348	1.1253	1.07776
KRT18	1.1335	0.9635	1.0786	0.984349
PRKAG1	1.0127	0.96469	0.97344	0.9999
ARPC4;ARPC4-TTLL3	1.058	0.96502	1.093	0.968898
CAPZB	0.79046	0.96504	0.89163	0.962186
GFPT1	0.95778	0.96563	1.0554	0.965904
FASN	0.8708	0.96612	0.96651	1.06763
TSR1	1.2952	0.96627	1.0229	0.934143
PET112	1.1632	0.96649	1.0085	1.0945
FLNC	1.0852	0.96652	1.1376	0.895015
PRKCI	1.4374	0.96664	1.172	1.21247
PYGB	1.1949	0.96767	1.6161	1.34338
RTN3	1.0276	0.96843	1.0022	1.09011
IPO4	1.0303	0.96966	1.227	1.16087
GLUD1;GLUD2	0.89673	0.97013	1.0327	1.01812
ESYT1	0.94271	0.97113	0.98153	0.965997
DIAPH1	0.9842	0.97124	1.0193	0.985222
PPP2R2A;PPP2R2D	1.039	0.97162	1.0663	1.10311
IMPDH2	0.91863	0.97184	1.0133	1.19816
NIPSNAP1	1.1893	0.97197	0.97849	0.82905
YWHAH	0.90135	0.97269	1.012	0.897102
HSD17B12	0.85174	0.97271	0.94718	0.938086
HNRNPF;HNRNPH1	1.1067	0.97322	1.0981	0.782963
ANXA2;ANXA2P2	0.82506	0.97375	0.79429	1.15697
HMGCS1	0.72794	0.97415	0.9618	1.05558
XPO1	1.0204	0.97431	1.09	0.90269
RANBP1	0.97119	0.97435	0.97849	0.931099
NCKAP1	0.84227	0.97441	1.0135	0.875503
BYSL	1.0073	0.97494	0.6535	0.719942
SRSF11	0.96198	0.97498	0.76948	0.687711
PFDN5	1.0325	0.97515	1.0475	0.940115
ADD1	0.84368	0.97606	1.218	0.929627
PPP3CA;PPP3CC;PPP3CB	0.89038	0.9761	1.0485	0.907606
POTEE;POTEI;POTEJ	1.31	0.97678	0.98873	1.16044
P4HA2	0.80591	0.97716	0.79926	0.869565
NUP107	1.1954	0.97755	0.98924	0.97144
TXN	0.97363	0.97798	1.059	0.928591
CAPN1	0.87758	0.97798	1.0087	1.1026
PHF6	1.1959	0.97851	1.0015	0.90212
KRT8	1.1255	0.97916	1.0661	1.01043
TPP1	0.742	0.97985	0.97175	1.10683
FKBP1A;FKBP12-Exin;FKBP12-Exip2	0.91747	0.98063	1.0589	0.945895
MARCKS	1.0131	0.98123	0.91418	0.917095
ACTBL2	0.97867	0.98134	0.92856	1.04905
PLOD3	0.99101	0.98253	0.9499	0.875887
BOLA2;BOLA2B;LOC101060252	0.73987	0.98259	0.81817	0.848824
RPN1	1.0046	0.98275	0.97111	1.04849
BSG	0.92331	0.98333	1.1618	1.0004
KRT2	0.92947	0.98364	0.88764	1.29413
SULT1A1;SULT1A2	0.93775	0.98462	1.0306	1.00901
NUP160	0.95161	0.98528	0.94012	0.995421
FARSB	0.9034	0.98564	1.0511	0.87604
MAGEA10;MAGEA4	1.0423	0.98633	0.92356	0.96768
GEMIN4	0.98974	0.98661	0.84655	1.33376
ASF1A;ASF1B	1.1084	0.98679	0.9947	0.978665
IPO7	0.93034	0.98687	1.1156	0.973141
IQGAP2	1.1035	0.98729	1.2101	0.99691
SLC25A24	0.98945	0.98795	1.0274	1.03063
IKBKAP	1.0883	0.98809	0.89428	1.04363
PTGR1	0.7667	0.98833	0.8621	0.963948
MCM3	0.91556	0.98879	0.96455	0.991768
SUMO2;SUMO4;SUMO3	0.805	0.98909	0.88196	0.947329
ATP5B	0.93842	0.98939	0.94843	1.0327
PSMD1	1.0662	0.98993	1.1029	1.08475
SEC24D	1.1884	0.99003	1.1311	0.849185
GCLC	0.83896	0.99005	0.97389	1.04594
NME2;NME1-NME2;NME1	1.0427	0.99117	1.0362	0.939144
ECH1	1.0063	0.99194	0.84808	1.03154
PPP1R12A	0.86762	0.99199	0.87801	1.01831
SF3B1	1.1033	0.99235	0.95162	0.911328
MTA2	0.69921	0.99306	0.66796	1.15165
NAF1	1.168	0.99465	0.83785	0.905961
PRKACA;KIN27;PRKACB	1.0938	0.99481	1.1639	0.943307
EDF1	0.91783	0.9952	0.89194	0.92687
KRT12	0.96481	0.99559	0.92059	0.825287
KRT19	1.1453	0.99574	1.0059	0.993246
DHX30	1.1872	0.99584	0.91654	1.05716
TUBB4A	1.2406	0.99708	1.0345	1.14448
SRPK2	1.185	0.9981	1.2804	1.45779
LMNA	0.96138	0.99891	0.95192	1.08438
DYNC1H1	1.0313	1.0003	1.0212	0.972857
CAP1	1.0617	1.0008	0.97997	0.931099
FUS;TAF15	0.91548	1.0011	1.0299	1.01996
TUBA4A	1.0093	1.0019	0.99696	1.02003
HSPA5	1.0076	1.0021	0.92653	0.972857
HEATR5A	0.95451	1.0025	0.9802	0.923361
SEC61A1	1.0591	1.0031	1.0753	1.00737
MICU1	1.2587	1.0038	1.0426	1.30078
SMC4	0.9853	1.0044	1.1738	1.00964
PFDN4	1.033	1.005	1.2261	1.01355
KDELR2	0.94859	1.0057	1.0047	0.98174
SEPSECS	2.3242	1.0067	1.3916	0.77997
ANXA1	0.90977	1.0068	1.0623	0.940203
PRKCSH	0.93605	1.0078	0.87951	1.16535
MYL12A;MYL12B;MYL9	1.0933	1.008	1.2216	1.20098
ASPH	1.0837	1.0083	0.89847	0.940203
CAND1	0.98558	1.0088	1.0989	0.884017
CALM1;CALM2;CALM3	1.0715	1.0109	1.02	0.903669
TWF1	0.92802	1.0114	1.1254	0.773874
USP39	0.81318	1.0119	0.84559	0.918105
PFN1	0.98647	1.0135	1.0372	0.954836
RPLP2	0.97917	1.014	0.83355	0.868508
SEC24A	1.04	1.0147	1.0028	1.07203
BCCIP	1.158	1.0155	1.048	0.978091
GART	0.82391	1.0161	0.95583	0.979432
PTGES3	0.92427	1.0165	0.96511	0.993049
COPS4	0.97662	1.0183	1.0276	1.08074
FLNA	0.94234	1.0185	1.0771	1.02808
MRPS16	1.4509	1.019	0.79602	0.765228
VIL1	0.97828	1.0198	0.833	1.18377
USP15	1.1904	1.0205	1.0568	1.0536
ACO2	0.90506	1.0215	1.0063	1.47982
POLR2J3;POLR2J2;POLR2J	1.1239	1.0217	0.85003	1.16843
S100A16	0.79015	1.0222	0.78134	1.05239
RAN	1.0174	1.0225	1.0312	0.968148
POLR2B	0.89532	1.0236	0.8707	1.33205
PSMC3	0.96873	1.0237	1.0404	1.04422
PRDX1	1.0471	1.0238	1.0403	1.0258
PRPS1	1.0707	1.024	0.88294	0.808996
SEC13	1.0528	1.0242	1.0857	0.99453
ATP5A1	0.97989	1.0242	0.98477	1.02169
ECI1;DCI	0.89103	1.0244	1.0023	1.08154
EIF2S1	1.1352	1.0248	0.954	0.966744
HDAC6	0.85806	1.025	0.78106	1.44972
SMIM20	1.0863	1.0256	0.98537	1.00383
SEC23B	1.0844	1.0256	1.0787	1.0501
MRPS35	1.8273	1.0268	1.0648	0.792896
IGF2R	0.87717	1.0275	0.95364	1.13771
LUC7L2	1.7946	1.0285	0.99022	1.48054
STMN1	1.0019	1.0285	0.92871	0.987264
NAP1L4	1.0735	1.0288	1.0093	0.975991
CORO1B	0.73756	1.0293	0.85894	1.13665
RPN2	0.95961	1.0297	0.95419	1.06391
ADAR	0.71904	1.0297	0.72804	1.00506
CYB5B	0.91767	1.0301	1.0083	0.970591
MDN1	1.0542	1.0304	0.99407	0.937734
SSBP1	1.0474	1.0308	0.98605	0.910167
DAZAP1	0.84387	1.0308	0.82917	1.23671
PRPF40A	0.9246	1.0313	1.0708	0.993937
GNB2;GNB1;GNB4	1.3089	1.0322	1.0218	1.20818
PPP1CA	1.0337	1.0335	0.96605	1.03197
ORF1	1.3811	1.0339	1.1484	1.04831
PCBP1	0.89223	1.0342	0.99886	0.952653
EIF5B	1.1651	1.0346	1.0212	1.04786
DDX5	1.0728	1.0346	1.0619	1.05425
SNRNP200	0.98872	1.0351	0.91995	1.11231
TUBB4B	1.0192	1.0352	1.0436	1.0374
MCM2	0.97399	1.0354	0.91927	1.02996
GYG1	1.6306	1.0359	1.4168	1.04917
PCNA	0.9926	1.0367	1.0142	0.982222
YWHAZ	1.007	1.0376	1.0243	0.967586
RBBP7;RBBP4	0.90017	1.0376	1.028	1.21446
DDX21	1.0918	1.0377	1.287	1.51513
TUBB3	0.90243	1.0379	0.99109	1.11272
GAR1	1.0981	1.0407	0.90113	1.07306
SLC25A3	1.0101	1.0407	0.97965	1.08102
MRPS23	1.7699	1.0413	1.0814	0.783331
ACP1	1.0883	1.0414	0.9462	0.939232
DNAJA1	1.0737	1.0419	0.97203	0.923276
MACF1	1.0597	1.0422	1.0178	1.01403
RPL11	1.1327	1.0433	1.0467	1.04261
NCAPG	1.0365	1.0436	1.1031	0.811622
U2SURP	0.81192	1.0438	0.96457	1.05148
YWHAG	1.0602	1.0439	1.0121	0.896218
PSMD13	1.0384	1.0447	1.0212	1.03425
RPLP1	1.0696	1.0452	0.86483	0.802053
TXNDC12	1.0785	1.0454	0.93408	0.951203
CTPS1	0.85089	1.0454	1.0811	0.889759
VCP	0.97002	1.0473	1.0092	1.07614
CTSB	1.058	1.0477	0.86734	1.05171
TUBA1B	1.0017	1.0478	1.0624	1.04005
CDV3	0.99374	1.0486	0.95137	0.764877
OLA1	1.3024	1.0487	1.0175	1.02549
RAC1;RAC3;RAC2	0.89678	1.0489	0.88412	0.770238
PELP1	0.93055	1.049	0.94902	1.23856
TPM3	0.71383	1.0493	0.86818	0.962371
PSMC4	1.0194	1.0496	1.0796	1.0141
PPP2CA;PPP2CB	0.94014	1.05	0.97192	1.01707
FLII	1.0936	1.0503	1.0248	1.04144
TPM2	1.018	1.0504	1.1011	0.980296
SFPQ	0.99443	1.0505	1.0189	0.960984
PHGDH	0.87699	1.0505	0.98859	1.13407
CLTC	0.9431	1.0519	0.95938	1.22708
TMEM167A	1.1611	1.0532	1.1713	0.874049
TMEM109	1.1286	1.0537	1.0704	1.01853
ALDH3A2	0.92822	1.0537	0.88649	1.02201
MCM6	0.91518	1.0542	0.93364	1.00863
MCM4	0.86602	1.0545	0.92596	1.11532
NOMO2;NOMO1;NOMO3	0.85085	1.0545	0.96568	0.922509
PDCD5	1.0617	1.0546	1.029	0.962094
NOLC1	1.5995	1.0558	0.87527	0.780701
TMED5	0.81267	1.0559	0.82934	0.908348
COPB2	0.96143	1.0568	0.93616	1.03162
PFDN2	1.0045	1.057	1.0252	0.871536
ACOT13	1.0053	1.0574	0.88075	1.02072
AIFM1	0.90884	1.0576	0.85959	1.14398
DNAJA2	0.87108	1.0576	1.0662	1.11407
KHSRP	1.0341	1.0578	1.1307	1.021
LRRFIP1	1.0106	1.058	1.0835	0.866401
EIF2S2	1.0787	1.0587	1.0287	0.923873
RANGAP1	0.94246	1.059	0.81836	1.08671
NPLOC4	1.0053	1.0596	1.1286	0.891822
STRAP	1.2408	1.0607	1.2161	1.00212
2016-09-07	1.1528	1.0626	1.0847	0.972668
STT3B	0.9834	1.0627	0.99045	1.2172
COPG1	0.9295	1.0629	0.87598	1.01472
CRKL	0.88566	1.0633	1.0155	0.888415
KIAA1033	0.95656	1.0642	0.88515	1.20742
NOL6	1.5649	1.065	1.1097	1.03935
VDAC1	0.74397	1.0651	0.80601	1.18994
EPB41L5;EPB41L4B	1.4517	1.0663	0.98004	1.03081
REEP6	0.87154	1.0666	0.98445	0.956846
C14orf166	1.1579	1.0668	1.0842	0.889284
HSPA9	0.94933	1.0672	0.86528	1.05641
CRYZ	0.9532	1.0689	1.0473	1.03473
USP9X	1.1046	1.069	0.94014	0.845594
SEC24C	1.0436	1.0705	0.918	1.09088
RAD50	0.88174	1.0721	0.87608	1.09796
SEC24B	1.2791	1.0722	1.0934	1.06151
UBE2O	0.94182	1.0729	0.88611	1.20025
NASP	0.87568	1.074	0.93543	1.24128
DDX17	0.94226	1.0744	0.91527	1.04057
CUTA	0.9059	1.0749	0.89479	0.852079
HADHB	0.85812	1.0751	1.0825	1.03829
UBE2H	1.0467	1.0752	0.95747	1.13679
KTN1	0.99082	1.0759	1.0063	1.0767
MRPS33	1.7084	1.0763	1.0743	0.80032
PRPF8	1.0317	1.0766	0.99366	1.11949
PRDX3	1.1095	1.0767	0.96839	0.901469
ATP2A2	0.94477	1.0774	1.1142	1.03784
SCFD1	0.94021	1.0776	1.0533	0.94509
MAPK1	0.97261	1.0781	1.1058	0.901876
RUVBL2	1.1231	1.0789	1.0025	0.99108
WDR18	0.71328	1.0796	1.0504	1.18917
GTF2F2	0.75994	1.0797	0.78421	1.274
STK25;MST4	1.1492	1.0801	0.99391	0.945358
NCBP1	1.3664	1.0806	0.99878	1.00154
DYNC1I2	0.99389	1.0808	0.94068	1.28205
MGST1	0.88998	1.0817	0.95679	1.10022
SPATS2L	1.1934	1.0819	0.92994	0.945984
DDOST	0.98629	1.0827	1.0446	1.07273
SFN	0.89347	1.084	1.002	0.860733
EFTUD2	1.0562	1.085	0.97303	1.16653
EIF4B	1.0011	1.085	0.93908	1.06221
EBP	0.92024	1.0872	1.0692	1.16984
PSMD2	1.0076	1.0875	1.0603	1.08259
THUMPD3	1.2539	1.088	1.2015	0.945716
EPB41	0.94223	1.0887	0.7434	1.71656
ARL1	1.025	1.0888	1.0321	1.08692
TUBB	1.0456	1.0898	1.0763	1.14764
ELP3	0.85891	1.0905	0.89477	1.17235
RARS	1.2417	1.0908	1.0496	0.996314
PFN2	1.05	1.0917	1.0759	0.890789
HSPE1	0.94217	1.0917	1.0238	0.970968
ACACA	0.91339	1.0917	1.006	0.985416
GCN1L1	1.0158	1.0922	1.0303	0.890393
NSFL1C	1.0255	1.0925	1.0676	0.949758
LARS	1.1912	1.0934	1.0166	1.03322
CUL4B;CUL4A	1.0404	1.0937	1.1055	0.923446
DKFZp686J1372;TPM3	0.96838	1.0937	1.0604	0.980104
PIP4K2A	0.99428	1.0947	0.8726	0.916506
ATP6V1G1;ATP6V1G2;ATP6V1G2-DDX39B	1.1866	1.0954	0.93338	0.950751
MAPRE1	1.0581	1.0979	1	0.938438
CCNL1	1.0271	1.0979	1.0412	1.16903
YWHAB	1.0433	1.0984	1.0963	0.924556
PLOD2	0.83465	1.0987	0.99386	1.18881
PSMC6	0.94499	1.0988	0.92683	1.00254
CTSC	1.0238	1.0992	1.0536	1.0334
UQCRC2	0.83491	1.0995	0.79812	0.998403
KIAA0196	0.81182	1.0996	0.9758	1.16004
LGALS1	0.96006	1.1004	0.99085	0.982994
C1QBP	0.85895	1.1007	0.76063	1.01028
CCT6A	1.0451	1.1009	1.0441	0.987849
NOP56	0.95884	1.1011	0.88919	1.12363
TPR	0.93974	1.1012	0.89777	1.07026
KPNA6;KPNA5	1.0723	1.1015	0.92763	1.08678
CCT7	1.0351	1.1015	1.0459	1.03052
ACSL4	0.79332	1.1017	0.97069	0.976372
DDX47	1.0939	1.1019	1.0214	1.12947
HMGB2	0.94513	1.1022	1.0466	1.0421
PIP4K2C	1.1879	1.1027	1.0488	0.947688
SSB	1.2499	1.1035	1.0299	1.17008
CKAP4	0.93551	1.1042	0.97563	1.15191
PSMD11	0.93545	1.1044	1.0306	1.01571
COPZ1	1.0991	1.1049	0.85344	1.05662
EEF1G	1.1273	1.1064	1.0597	1.00418
TMOD3	0.92677	1.1068	0.9185	0.9758
COPA	0.94842	1.107	0.93608	1.07558
SLC25A11	0.94817	1.1071	0.97496	1.08795
MRPL10	1.2545	1.1081	4.6827	1.20878
PSMC5	1.0759	1.1081	1.0472	1.13929
MRPL3	1.4101	1.1083	0.97019	1.0454
LASP1	0.93633	1.1099	0.96856	0.845523
TRIM25	0.99547	1.1104	1.03	1.0093
MYL6	1.1052	1.1118	1.037	1.06054
NR2C2AP	0.92106	1.1118	1.0829	0.704523
	1.043	1.112	1.0292	1.39158
FBL	1.1048	1.1124	0.89368	1.17445
YBX3	0.68608	1.1126	0.41039	0.785978
ACLY	0.95539	1.1137	1.036	1.02638
XPOT	1.4247	1.1145	1.3083	0.960061
BUB3	0.81603	1.1146	1.0294	1.07601
SRP54	1.7992	1.1147	1.1837	0.959601
CCT3	1.0508	1.1154	1.0675	1.03608
KIAA1967	1	1.1156	1.1228	0.985999
ELAC2	1.0967	1.1158	1.0458	1.02478
TCP1	1.0231	1.1158	1.084	1.03203
PSMD6	1.1829	1.1166	0.89703	1.20553
BRD4	1.0746	1.1172	0.90302	0.809192
VDAC2	0.7638	1.1173	0.8571	1.31309
LSM2	1.1727	1.1175	0.93697	0.985125
SPTAN1	1.0456	1.1181	1.0281	1.01287
PTMS	0.95557	1.1184	1.0109	1.12482
SRPK1	1.318	1.1188	1.1958	1.04424
EPRS	1.1988	1.1199	1.0482	1.05502
ATP5F1	1.0104	1.1203	0.89358	1.03974
PSMA3	1.1869	1.1205	1.0286	0.944644
C22orf28	1.0782	1.1212	1.0937	0.913993
GPS1	0.9426	1.1212	0.98313	1.02973
COLGALT1	1.0473	1.1214	1.0496	0.843739
MRPS18A	1.8166	1.1215	1.084	0.77226
PGRMC1	0.95762	1.1218	1.0042	1.08512
KPNA2	1.4525	1.1233	1.0763	0.926269
NUP205	1.2184	1.1235	1.2992	0.744214
NDUFA5	0.89892	1.1235	1.1239	1.03565
LSM1	1.2784	1.1241	1.0969	0.870019
RAB7A	1.0376	1.1244	1.004	1.10364
FABP3	0.66992	1.1246	0.70149	1.19559
TMCO1	0.92187	1.126	0.96435	1.12349
CCT5	1.0112	1.1262	0.99195	1.02899
KPNA4	1.1773	1.1274	1.0193	1.08998
SKIV2L2	1.0896	1.1277	0.99728	0.909008
CYB5R3	0.978	1.1277	0.81658	1.11032
SLIRP	0.91037	1.1282	0.8382	0.983478
SEC23A	1.0374	1.1286	1.0503	1.11188
COPS2	1.0108	1.1287	0.9504	1.06598
CCT8	1.0257	1.1308	1.0628	1.10082
LRP1	1.0143	1.1311	1.1648	1.25478
SRSF6	0.91459	1.1316	0.93875	1.29975
MSMO1	0.99854	1.1321	1.1103	0.910581
CTNNA1	0.90934	1.1322	1.0244	0.847673
PSMD7	0.93373	1.1326	0.96266	0.960707
POP1	1.4566	1.133	1.0676	0.925069
POP5	0.93164	1.1344	0.66756	1.18575
TCEB2	0.97662	1.1346	1.0336	1.03265
SNRNP40;DKFZp434D199	1.0315	1.1367	0.94099	1.18725
NOLC1	1.6153	1.1371	0.84993	0.733299
DHCR7	0.97127	1.1372	0.94007	1.10439
CCT4	0.97629	1.1376	0.9454	1.07359
FKBP11	0.77381	1.1378	0.94469	0.859402
GTF2I	1.1353	1.1379	1.3858	1.12983
PSPC1	0.82333	1.1398	0.8533	1.36522
ANKRD28	0.71029	1.1409	0.99341	1.07358
MRPS17	1.8202	1.1414	1.0078	0.812348
TRMT10C	1.3079	1.1414	1.069	0.960061
RBX1	0.98914	1.1418	1.0423	0.976562
CSNK1A1;CSNK1A1L	1.0355	1.1421	1.0811	1.1878
CDK11A;CDK11B;CDC2L1	1.0674	1.1424	1.0749	1.22677
MRPL28	1.3197	1.1426	0.86706	0.97229
TPM4	0.99211	1.1456	1.0706	0.958038
GNL1	1.1955	1.1457	0.99728	0.733999
GLG1	0.85449	1.146	0.99619	1.49793
NDUFS8	1.2328	1.1468	0.88024	1.19466
CCT2	1.009	1.1474	1.068	1.06923
HUWE1	0.94693	1.15	0.97006	1.0256
COPB1	0.96114	1.1503	0.87009	0.995025
MRPL22	1.432	1.1504	0.75279	1.10277
POLR2A	0.91637	1.1504	0.93117	1.26525
PLD1	1.2091	1.1507	0.90614	1.16074
PRDX4	0.99103	1.151	0.99195	1.01125
PSMD5	1.084	1.1513	1.0847	1.07309
ELAVL1	1.1326	1.1515	1.0971	0.936154
VKORC1L1	1.0508	1.152	1.1522	0.870019
MARS	1.1578	1.1525	0.99439	1.01343
MAGED2	1.0078	1.153	0.84852	1.11748
PSMC1	0.94126	1.1531	0.9784	1.12119
MRPL39	1.3401	1.1532	0.989	0.919118
SLC25A6;SLC25A4	1.0133	1.1537	0.8835	1.15493
KARS	1.2848	1.155	1.0433	1.08746
MRPL11	1.2888	1.1552	1.01	0.922339
NAA38	1.1522	1.1558	0.9352	0.973615
PPP6C	1.016	1.156	0.94496	1.11377
RPA3	1.0201	1.1561	1.1811	0.99295
UTRN	1.0098	1.1564	0.97022	0.91659
PSMA2	1.0368	1.1565	0.95215	1.0688
RBM25	1.0606	1.1572	0.98301	1.00761
RTCA	1.0683	1.1597	0.97828	1.18
RTN4	0.98881	1.1604	1.0982	1.0047
MSH6	1.1491	1.1614	1.2427	1.07102
MRPL38	1.4867	1.1637	1.4891	1.04819
MRPL44	1.2928	1.1647	1.0295	1.04361
PEG10;hCG_1642748	0.77592	1.1647	1.028	1.39962
RBMX	1.0688	1.165	1.0369	1.23151
PSMD8	1.0073	1.1654	0.89871	0.989022
SKP1	1.1517	1.1659	0.99859	1.03486
DARS	1.2463	1.166	1.0221	1.05364
COA3	0.96183	1.1665	1.0062	1.04297
HDLBP	1.2892	1.1673	1.348	1.00737
H3F3B;H3F3A;H3F3C;HIST2H3A;HIST2H3PS2;HIST3H3;HIST1H3A	0.99714	1.168	0.91253	1.36921
NUMA1	1.0056	1.1691	0.96562	1.11844
NCAPD2	1.1897	1.1706	0.99582	1.00334
COX6B1	0.84606	1.1719	0.78534	1.18943
SAE1	1.0281	1.1725	1.062	1.01224
PPP6R3	0.96419	1.1727	0.94689	1.1366
KRT6B	0.032008	1.1743	0.050437	16.2375
CWC22	1.1178	1.1744	0.74707	0.706115
CAPNS1	0.99296	1.1749	0.91873	0.929454
MRPS34	1.4853	1.1751	0.9417	0.723223
PSMC2	0.99957	1.1751	1.0812	1.14874
MRPL19	1.2061	1.1764	0.97829	0.936505
MAP4	0.90479	1.1775	0.97375	0.984446
NCL	0.98687	1.1783	0.99972	1.35015
KPNA3	1.1942	1.1786	1.1251	0.996512
U2AF1;U2AF1L4	1.2515	1.1795	0.96647	0.891822
SYNCRIP	1.1305	1.1807	1.1779	1.22248
GEMIN5	1.2067	1.182	1.189	1.02044
HSD17B10	1.1945	1.1833	1.0581	1.00886
FAM21C;FAM21A	0.85458	1.1836	0.81746	1.21632
MRPS14	1.8323	1.1857	1.1439	0.770535
LRRC47	1.0921	1.1868	0.88043	0.844381
AP3B1	1.0387	1.1868	0.84787	0.950932
NUP155	1.0178	1.1868	1.065	0.914913
TUBB6	1.2538	1.1883	1.129	0.89823
PSMB5	1.1797	1.1893	1.057	1.01269
H2AFV;H2AFZ;HIST1H2AA;H2AFX;H2AFJ	1.4545	1.1899	0.90693	0.8992
LIN28B	1.0561	1.1904	0.85988	1.11732
NHP2	1.1586	1.1912	0.91588	0.965437
SEC63	0.96818	1.1916	0.94977	1.04109
TUFM	1.2089	1.1926	0.95683	1.13876
POLR1B	1.2851	1.1934	0.98173	0.939496
EIF2B1	0.90549	1.1947	0.99752	1.08113
BIRC6	0.95014	1.1949	1.017	1.14498
RBBP4	1.0893	1.195	1.0004	1.13051
EIF3J	1.0317	1.1952	1.0644	1.03025
GTF3C3	1.3339	1.1954	0.9946	0.981643
SRSF10;FUSIP1	1.2208	1.1957	1.0909	1.99708
IARS	1.1761	1.1964	1.0074	1.05741
PTMA	0.93781	1.1982	1.0067	1.12072
TUBA1C	1.0151	1.1984	1.0693	1.06998
CSDE1	1.1218	1.2	1.2788	1.10958
POP7	1.4049	1.2004	1.3639	1.07309
MRPS10	1.8499	1.2007	1.1021	0.914411
CSNK2A2	1.0176	1.2012	0.82338	1.11452
NARS2	1.3404	1.2029	0.97159	1.19154
HIBADH	0.87594	1.2029	0.97984	1.13184
RBM3	1.1476	1.2033	1.2022	0.960061
PFN2	0.97971	1.2053	0.91912	1.03108
NDUFS3	1.0661	1.2055	1.0442	1.47371
LSM6	1.0887	1.206	0.93628	1.06273
YBX1	1.0489	1.2066	0.71392	0.785114
QARS	1.266	1.207	1.0588	1.00558
VARS	0.92564	1.2077	1.0806	1.18566
LSM3	1.0331	1.2082	0.93403	0.983768
PSMA4	1.1021	1.2085	1.1602	1.00195
PM20D2	1.0102	1.2086	0.92975	1.44215
HIST1H4A	1.0651	1.2103	0.83613	1.41211
AKAP8	1.4109	1.2109	1.1064	0.939585
PA2G4	1.0849	1.2111	1.0235	0.964785
RPP30	0.95545	1.2121	0.87955	1.08523
UBR4	0.99742	1.2128	0.94757	0.994332
RUVBL1	1.1269	1.2133	1.0317	1.09149
PSMA7;PSMA8	1.0873	1.2151	1.094	1.12188
RBM4B;RBM4	1.0518	1.2153	1.4741	1.64112
DLST	0.92475	1.2165	0.95182	1.23867
PRPF4	1.5072	1.2199	1.0634	1.08448
TRNT1	1.0067	1.2204	0.9689	1.25426
RPP25L	1.2775	1.2207	0.9428	0.965437
SEC61B	0.92185	1.2209	1.0475	0.923617
DHCR24;Nbla03646	1.2122	1.2214	1.2891	1.12328
ALDH18A1	0.9364	1.2221	0.97836	0.906783
MRPL13	1.4229	1.2222	0.98327	1.12016
CSNK2A1;CSNK2A3	0.97879	1.2227	0.8328	1.1818
COPS3	0.98841	1.2228	0.97001	1.11026
KIAA1429	0.88123	1.2242	0.965	1.19194
KHDRBS1	1.0069	1.2279	1.0182	0.969462
FAM162A	0.95693	1.2303	0.98762	1.18248
COPE	0.96029	1.2308	0.84735	1.16451
CNOT1	1.1436	1.2317	1.144	0.866701
IMMT	0.75753	1.238	0.80192	1.28598
AIMP1	1.3618	1.2388	0.97673	1.0328
MRPL15	1.2687	1.2388	1.2762	1.14365
POLRMT	1.1396	1.2388	1.2108	1.0688
APOB	0.80718	1.2394	0.88028	1.63308
DDX23	1.1202	1.2401	1.1299	1.25025
PSMD3	0.99426	1.2407	1.0339	1.03778
COPS7A	0.84872	1.2409	0.8948	1.15643
LSM4	1.1104	1.2411	1.0421	1.04679
ATP5O	1.0014	1.2414	1.0198	1.06395
MRTO4	1.129	1.2418	0.93055	0.83654
QRSL1	1.2769	1.2431	1.1434	1.1278
PSMB3	1.2037	1.2453	1.0559	1.07913
LUC7L3	1.3448	1.2454	1.0137	0.925326
ATP5D	0.97828	1.2459	0.94238	1.07789
CAD	0.95629	1.247	1.117	1.10161
PSMA1	1.0677	1.2475	0.92739	1.04571
COPS5	1.0398	1.2488	0.9852	0.950029
PHF5A	1.3774	1.2493	0.93693	1.00751
MRPL47	1.5919	1.2498	0.96737	1.11188
GRB2	0.91463	1.2504	1.0249	1.07982
TECR	0.86156	1.2515	0.92789	1.20853
PDHB	0.96607	1.2547	1.0305	1.27073
TIMM50	0.90967	1.2554	1.1257	1.22383
MIF	1.0511	1.2555	0.92426	1.07745
THUMPD1	1.2548	1.2572	1.1407	1.26499
COPS7B	1.0245	1.2575	0.9194	1.04368
RPL5	1.4279	1.2588	1.1273	1.51368
ACTR1A	1.1282	1.2591	1.0442	1.20939
POLR2C	0.94501	1.2594	0.68749	1.67218
SIN3A	0.97207	1.2601	0.90042	1.40905
HIST1H2BL;HIST1H2BM;HIST1H2BN;HIST1H2BH;HIST2H2BF;HIST1H2BC;HIST1H2BD;H2BFS;HIST1H2BK;HIST1H2BI	1.0829	1.2604	0.97004	1.25419
RRP9	1.4827	1.261	1.0885	0.960523
AP3M1	1.0578	1.2616	0.77358	0.954927
GID8	0.98136	1.2618	0.67022	0.911079
HNRNPA2B1	1.094	1.2619	1.1063	1.09426
FXR1	1.0135	1.262	1.6471	1.12055
RNF213	0.92795	1.2623	0.93184	0.926526
MRPL32	1.0921	1.2629	0.88245	1.41028
VAPA	0.86902	1.2637	1.0065	1.0564
OGDH	0.92117	1.2656	0.85506	1.23308
HNRNPD	1.0642	1.2664	1.058	1.09697
NPM1	0.93468	1.2676	0.89302	1.22776
COX4I1	0.90596	1.2678	0.98813	1.2075
SF3B5	1.0369	1.2696	1.0587	1.00828
XRN2	1.2037	1.2705	0.97767	0.920556
P4HA1	1.0868	1.2709	0.88421	1.27416
MRPL40	1.3987	1.2717	1.021	1.17246
PSMA5	1.0957	1.2727	1.088	1.08846
TRMT1	1.1032	1.2736	1.1511	0.943218
SLC25A5	0.92401	1.2736	0.97737	1.11559
SSR1	1.0381	1.2742	1.0616	1.15421
PSIP1	0.99319	1.2751	1.1967	0.730674
ATP5H	1.048	1.2759	0.97026	1.15271
LARP7	2.1686	1.2767	1.21	0.792267
TRA2B	1.3027	1.2767	0.65134	1.13276
PRPF19	1.1019	1.2768	0.98877	1.03243
SNRNP70	0.95895	1.2785	0.841	1.21616
KRT5	0.17582	1.2794	0.15602	15.3459
PACSIN2	1.646	1.2797	1.0049	0.693577
FTSJ1	1.0661	1.2801	0.81783	1.19136
SLC25A1	0.80532	1.2801	0.81219	1.41481
APEH	0.74936	1.2808	0.99002	1.25701
SRSF5	1.0263	1.2814	0.9091	1.30647
TNPO1;TNPO2	1.0672	1.2832	1.1077	0.856164
PSMD10	1.0338	1.2837	0.91647	1.02764
COX5A	0.93359	1.2842	1.0192	1.29092
MRPL46	1.2746	1.2852	1.0278	1.27732
TARDBP	0.86294	1.2853	1.1051	1.03772
SRP68	1.8796	1.2854	1.1568	0.87581
RBM45	0.88657	1.2858	10.319	11.6694
LEO1	1.1557	1.286	1.0562	1.06074
NPM3	0.93852	1.2861	0.90878	1.30789
TCEB1	1.0356	1.2864	1.063	1.02974
RPL23A	0.93776	1.2874	0.61567	1.31387
AIMP2	1.2625	1.2879	1.038	1.0416
NES	0.87659	1.29	0.89982	1.1472
TRMT5	1.1898	1.2919	0.88443	1.20758
SNRPD1	1.1533	1.2939	0.94629	1.24231
SRSF7	1.0054	1.294	1.0456	1.46985
TPD52L2	0.89298	1.2947	0.92613	0.805477
PSMB7	0.96544	1.2964	0.85038	1.15189
EIF3B	1.0348	1.2984	1.0227	1.05022
HNRNPUL1	1.2913	1.2996	1.0863	1.15089
SRRT	0.98201	1.2996	1.0436	0.964134
BAG2	1.0241	1.3009	0.9817	1.22549
SNRPC	1.1146	1.301	0.90028	1.14358
ATP5C1	1.0321	1.3021	1.0387	1.09314
HDAC2	0.4123	1.3024	0.36487	2.90875
DAD1	1.0729	1.3077	1.05	1.10935
PRKDC	1.0163	1.3097	1.0758	0.887942
ATP5L	1.033	1.3115	1.1229	1.11635
NSUN2	1.1154	1.3122	0.92388	0.663174
MRPS6	1.9731	1.3126	1.3374	0.85237
MRPL41	1.4273	1.3142	1.0125	1.07556
WDR61	1.1332	1.3144	0.95498	0.944733
DNAJA3	0.98294	1.3151	1.0017	1.17028
SURF2	1.6775	1.3155	1.1149	1.10801
EIF4G1	0.89397	1.3158	1.1724	0.896781
TOP2B	0.93978	1.3191	0.94575	1.03413
PUS1	1.0321	1.3194	0.95141	1.06542
TFG	1.0838	1.3205	1.0029	1.11717
PMVK	1.03	1.3221	1.0475	0.913826
PPM1G	1.0054	1.3225	0.97103	1.2284
ATP5J2;PTCD1;ATP5J2-PTCD1	1.0618	1.3236	1.0649	1.13973
DR1	1.0266	1.325	1.0004	0.938879
LTV1	1.4724	1.3251	2.3213	0.839278
ABCF1	1.0139	1.3274	1.046	0.918864
HIGD1A	1.0772	1.3282	0.92327	1.09363
COPS6	0.87072	1.329	1.0075	1.05158
PSMB1	1.0672	1.3305	1.1778	1.11574
STOML2	1.0606	1.3307	0.86336	1.21883
2016-09-02	1.1243	1.3334	1.1841	0.877655
SRP19	2.4505	1.3342	1.395	0.906618
COPS8	1.1527	1.3345	0.9986	1.15109
EXOSC7	1.0454	1.3345	1.1578	0.929195
SRP72	1.7485	1.3347	1.1357	0.848392
CPSF7	1.2598	1.3357	1.2268	0.72685
PPIB	0.97994	1.3369	0.9733	1.14532
PSMA6	1.1813	1.3371	0.99586	1.03813
HIST2H2AC;HIST2H2AA3;HIST1H2AJ;HIST1H2AH;H2AFJ;HIST1H2AC;HIST3H2A;HIST1H2AD;HIST1H2AG;HIST1H2AB	1.1551	1.3405	0.92623	1.27678
HIST1H1C;HIST1H1E;HIST1H1D	0.64062	1.3417	0.73753	1.27361
EEF1B2	1.1753	1.3427	1.0227	1.0277
CSNK2B;CSNK2B-LY6G5B-1181;CSNK2B-LY6G5B--991	1.0169	1.3451	0.77498	1.14759
SRSF2	1.2722	1.3475	1.0413	1.48803
HLTF	0.86573	1.3475	0.94786	1.1153
NHP2L1	1.4119	1.3486	0.87623	1.06343
OSTC	1.2243	1.3489	1.1468	1.03177
NOP58	1.0703	1.3497	0.80351	1.22579
HNRNPA1;HNRNPA1L2	1.1104	1.3506	1.1387	1.02301
MYBBP1A	0.96888	1.3518	1.111	1.06348
EDC4	1.0574	1.3519	1.141	0.963484
PLIN3	0.85623	1.3531	1.0068	0.833472
EXOSC8	1.1294	1.3543	0.91191	1.00391
DYNLRB1;DYNLRB2	1.0125	1.3552	1.0947	1.07691
GATC	1.266	1.3555	1.0201	1.181
PSMB2	1.0771	1.3558	1.0033	1.08121
SRP14	1.9096	1.356	1.2154	1.0019
SUB1	1.1011	1.3579	0.96385	1.05598
NACA	0.84774	1.3586	0.8918	0.895496
UBR5	0.99677	1.3591	1.1142	1.01204
TMED10	1.2181	1.3628	1.0086	0.963577
MRPL34	1.3733	1.3638	0.84767	1.10342
MRPL49	1.4676	1.3642	1.0479	1.10108
MRPL18	1.3975	1.3647	1.0421	0.98668
AP3D1	0.9761	1.3671	0.82381	0.929887
BTF3	0.92002	1.3685	0.86008	0.950299
MRPL27	1.5762	1.3694	1.1286	1.02484
MAP1B	1.078	1.3702	0.93798	1.04056
EIF3D	1.0269	1.3709	1.0624	0.980488
CYC1	0.91273	1.371	0.84054	1.20304
SND1	1.1243	1.3737	1.1097	0.969368
HIST1H1B	0.66512	1.3743	0.55005	1.29359
SLC25A13	0.77333	1.3754	0.82379	1.38762
LEPRE1	0.92218	1.3757	1.1903	0.981354
USMG5	0.906	1.3776	0.99658	1.23472
POLR2E	1.2464	1.379	0.93401	1.30195
LMNB1	1.0139	1.3807	1.1462	1.3161
MRPL23	1.2388	1.3818	1.0392	1.21274
PFDN6	1.0058	1.3824	0.9057	1.01199
KRT1	0.076905	1.3848	0.089616	27.7863
MRPL14	1.2743	1.3854	0.98796	1.25867
HBS1L	1.9669	1.3857	1.0827	1.00378
PELO	0.90563	1.3866	1.0095	0.736648
MRPL43	1.5923	1.3867	1.1199	1.03321
HNRNPUL2;hCG_2044799	1.0418	1.3891	1.1427	1.28957
MRPL17	1.3957	1.3892	0.99041	1.1054
TRMT112	1.321	1.3928	1.0547	1.10889
CTR9	0.92547	1.3936	0.8415	0.984543
FRMPD4	2.2264	1.3967	1.3803	1.06278
HIST1H1A	0.84013	1.3989	0.74034	1.02019
EIF3G	1.0928	1.3994	1.0516	1.15772
UQCRB	1.0423	1.4021	0.92768	1.35183
SNRPN;SNRPB	1.1837	1.4029	1.0282	1.33736
CDC5L	1.2014	1.4033	1.0964	0.986777
EIF3A	1.0351	1.4036	1.0361	1.09242
NDUFA13;YJEFN3	0.78855	1.4039	0.75055	1.3427
EIF2B2	0.92999	1.4047	0.82769	1.12984
DHX36	1.2038	1.4051	1.1981	1.1747
TSPAN10	1.2352	1.4053	1.1529	1.04174
SUPT5H	0.9725	1.4057	0.91963	1.00375
RPP14	1.0297	1.4099	0.97085	1.11736
TAF5	1.3215	1.4133	0.9174	0.829531
SNRPA1	1.2178	1.4141	1.0737	1.23191
SLTM	1.1517	1.4147	1.2183	1.27691
ATP5I	1.3057	1.4148	1.0171	0.975039
MRPL21	1.1306	1.4181	0.89551	1.18053
POLR2D	1.0279	1.4189	0.86626	1.40692
EIF3F	1.0628	1.4204	0.94129	1.20767
MRPL20	1.4187	1.4212	1.0191	0.984543
DCTN2	1.0468	1.4232	1.2938	1.1941
SMARCA5;SMARCA1	1.4851	1.4247	0.98995	0.896459
PTRH2	1.3523	1.4298	0.99961	1.15477
SNRPB2	1.2156	1.4299	1.0805	1.31914
MTAP	0.97565	1.431	1.0637	0.997307
DYNLT1	1.2188	1.4342	1.055	1.09612
UQCR10	1.0877	1.4349	1.0137	1.218
EEF1D	1.107	1.4362	1.1084	1.11024
MCM7	0.94979	1.4374	0.83189	1.1061
ARCN1	0.93005	1.4419	0.83943	1.00327
PAIP1	0.78885	1.4426	0.89232	1.1085
PRPF6	1.0784	1.4449	0.87695	0.778756
ABCD3	0.77536	1.4452	1.2345	1.33472
SNRPF	1.1987	1.4454	1.0245	1.31409
C11orf48	1.3407	1.4479	1.021	0.964506
SUPT16H	0.87536	1.448	0.83324	0.907523
ERLIN2	0.82765	1.4486	0.96112	1.28492
TRMT11	1.0266	1.4487	1.0607	0.959325
CIRBP	1.3281	1.452	1.2696	1.07402
SSRP1	0.87381	1.4535	0.87242	1.01718
HNRNPR;HNRPR	1.3676	1.4554	0.99888	1.15038
SEC11A	1.1109	1.4556	1.1815	1.0291
PSMB6	1.0654	1.4564	1.0168	1.19372
SSR4	1.1026	1.4598	1.1253	1.1377
SF3B14	1.1663	1.4604	0.89523	0.97972
RBM42	1.5162	1.4637	1.432	1.53238
SNRPE	1.1857	1.4637	1.0061	1.32631
SRP9	1.8937	1.4665	1.2443	1.00605
ANP32A	0.91721	1.4675	0.90215	1.19355
SNRPA	1.0236	1.4679	0.98575	1.28901
GRWD1	1.8031	1.4731	0.93863	0.951475
AP3S1	1.155	1.4751	0.8377	0.984931
NDUFA4	1.0355	1.4773	1.0626	1.13794
CPSF6	1.4549	1.4812	1.0396	0.911245
RRP7A	1.6722	1.4821	1.1655	0.96581
EXOSC10	0.88524	1.4866	0.96429	0.907606
HNRNPL	0.93266	1.4875	4.8436	2.44708
HSPB1	0.88661	1.488	0.99683	1.14792
NUDT21	1.415	1.491	1.1008	0.932314
PHB	0.95563	1.4933	1.0007	1.35232
SNRPG	1.1966	1.4942	1.0174	1.35564
HNRNPA0	1.2562	1.4954	1.2446	1.2783
RRBP1	1.0253	1.4979	0.98503	0.995124
RTF1	1.1969	1.4988	0.96613	1.03174
ANP32B	0.97829	1.4998	0.94053	1.30024
ZC3HAV1	1.3408	1.502	1.1601	1.5933
SERBP1	1.4629	1.5024	1.3072	1.03343
POLR1A	1.3137	1.5029	1.0967	0.92302
ZRANB2	0.98817	1.5032	0.76983	1.02238
DYNC1LI1	1.0406	1.5037	0.98759	1.13941
EXOSC4	0.92095	1.5051	1.1162	0.987947
EIF3C;EIF3CL	1.0486	1.5088	1.0104	1.08496
SNRPD3	1.2175	1.5106	1.0387	1.24234
EEF1E1;hCG_2043275	1.4068	1.5154	1.1205	1.05894
EIF3L	1.0182	1.5171	1.0716	1.15816
SET	0.93328	1.5186	0.92747	1.30748
PSMB4	1.1851	1.5193	1.0586	1.10946
ANP32E	0.88666	1.5198	0.89183	1.34998
EIF3E	1.0076	1.5216	1.0168	1.14931
ESF1	0.91394	1.5245	1.1082	1.42231
EIF3H;EIF3S3	1.1192	1.5282	1.0183	1.04755
RBM10	1.1408	1.5313	1.2553	1.42978
MRPL53	1.3029	1.5393	1.0684	1.28338
EIF3I	1.1227	1.5416	1.0299	1.05964
SNRPD2	1.1775	1.5425	1.0297	1.28401
NCBP2	1.3573	1.5487	0.97648	1.1473
PHB2	0.92406	1.5502	1.01	1.34243
EIF1AX;EIF1AY	1.377	1.551	0.95738	0.996711
C9orf43	4.3683	1.5516	0.94742	1.41523
POLR2H	1.1659	1.5689	0.98596	1.21272
MYO18A	1.0383	1.5715	0.97947	1.01479
RRP1B	1.2114	1.5758	0.98827	0.940734
DLAT	0.87976	1.5922	1.093	1.64495
EIF3M	1.108	1.5976	0.99719	1.09849
SF3A1	0.93988	1.6011	0.9498	1.0918
MRPL12;SLC25A10	1.3708	1.6028	1.0248	1.18948
C11orf31;SELH	1.0081	1.6036	0.96172	1.25902
SAP30BP	0.9062	1.6097	0.92878	1.23723
HNRNPU	1.0741	1.6263	1.0803	1.13514
SF3B2	1.1667	1.6328	0.89462	0.885818
EMC1	1.0224	1.6337	1.3181	1.3398
RBM39	1.4536	1.6374	1.1346	0.892857
DYNLL2;DYNLL1	1.1233	1.6383	0.99581	1.14603
IWS1	0.93782	1.642	0.91073	1.06728
HNRNPH3	1.3405	1.6421	1.4453	1.13164
EXOSC2	1.4505	1.6437	1.4522	0.903016
IMP3	1.4546	1.652	1.0707	1.32245
MRPL55	1.3702	1.6543	0.96223	0.984737
MRPS31	1.7158	1.6547	0.89827	0.769882
CDC73	0.87052	1.6547	0.93472	0.90212
HNRNPA3	1.1645	1.6554	1.2497	1.35248
NMD3	1.0096	1.658	0.92421	0.980681
MRPL48	1.4591	1.6708	1.0645	1.28207
C7orf50	1.2818	1.6733	1.0643	1.04426
CPSF2	1.2556	1.674	0.91129	1.12249
HDGFRP2	1.0517	1.6767	0.81884	0.891345
SRSF1	1.0782	1.684	1.0837	1.55092
CMSS1	1.5288	1.6944	1.163	1.24916
CHD4	1.0531	1.6973	0.97394	0.913576
SUPT6H	1.009	1.7008	0.98978	1.08189
ASCC2	2.5988	1.7071	1.3668	0.735943
SUPT4H1	1.1558	1.713	1.0419	1.07519
WIBG	1.1286	1.7154	0.93489	0.961446
AHNAK	0.99956	1.7249	1.0055	0.95229
S100P	1.7039	1.7303	1.1423	1.14448
CTSA	1.2359	1.7329	1.1418	1.17761
MAT2A	1.1725	1.7372	1.2204	1.13915
CCDC124	1.0435	1.7377	1.0433	0.758898
ERH	1.0114	1.7505	1.0137	1.14646
TRIM28	1.0161	1.7604	1.1772	1.13827
MRPL37	1.2871	1.7838	1	1.11503
HMGA1	1.182	1.7839	0.98116	1.1485
MAP1A	1.1659	1.79	1.1119	0.772618
CHCHD1	1.7519	1.7968	0.82996	0.890551
ASCC3	2.2742	1.7987	1.3117	0.71803
EIF3K	1.0895	1.8113	1.0732	1.22029
SMARCA4	1.0381	1.8142	1.0022	1.07763
PPIH	1.5512	1.8227	1.0533	1.1815
CNBP	1.1698	1.8248	1.1808	1.39363
KRT14	0.099103	1.8483	0.076185	11.8153
HTATSF1	1.0602	1.8515	0.95743	1.16624
TCOF1	1.1971	1.8686	0.91916	0.936067
CPSF1	1.3198	1.8895	1.0381	1.04552
EXOSC1	1.3151	1.8926	1.1254	1.03616
SMARCC1	0.9854	1.8953	0.97374	1.15371
SQSTM1	1.1219	1.8961	1.12	1.25122
G3BP1	1.7451	1.9648	1.055	1.08018
SRRM2	1.1969	1.9792	0.33701	0.686201
PDAP1	1.3728	2.0295	0.9414	0.828363
RBM14	1.6572	2.0528	1.6523	1.89541
TMA16	1.1558	2.0556	0.94694	1.22287
TFAM	1.5772	2.0802	1.157	1.27877
HNRNPAB	1.6947	2.1519	1.2445	1.18973
IGF2BP1	1.9048	2.1689	1.5263	2.05935
MAGEB1	0.68139	2.1701	1.0619	1.55652
ATAD3B	2.2832	2.1725	0.91489	1.30936
PDCD10	0.84623	2.1837	1.825	0.902935
ZNF593	1.2206	2.2281	0.98957	1.27827
ALYREF	1.1527	2.2519	1.1733	1.0042
MAGEB2	0.81324	2.297	0.95407	0.918105
ACIN1	0.8215	2.5609	0.75452	0.862143
APOA1BP	0.88404	2.6284	0.8003	0.962001
CHD9;CHD7;CHD8;CHD6	1.0931	2.6445	1.0245	0.966931
HMGA2	1.3586	2.6694	1.1182	0.99691
PABPN1	1.6503	2.6937	1.2978	1.2203
CTCF	2.2342	2.8112	1.2071	1.57811
IGF2BP2	2.4163	2.8514	1.735	2.56154
IGF2BP3	1.7978	2.8839	1.8567	2.77262
TJP2	1.0427	3.0203	1.4683	2.87778
SART3	2.6165	3.1922	1.3901	1.74917
ATAD3A;ATAD3C	1.6865	3.1987	1.0247	1.77768
TRIM71	3.5477	3.2574	1.2828	1.40489
HNRPDL	2.6474	3.5728	0.92991	1.11977
UTP3	1.4019	4.3557	1.927	1.15137
DDX6	3.3177	4.5001	6.7359	9.02201
USP10	3.8092	4.5702	1.0771	1.28153
EDC3	3.9581	5.5963	7.0453	5.36625
IMPDH1	1.0891	5.6537	1.1983	1.8356
GRSF1	3.901	5.6974	1.2251	2.01292
CAPRIN1	4.4573	5.9693	0.9287	1.06337
G3BP2	4.0749	7.374	0.79025	1.20703
GOLGB1	0.88218	81.744	12.76	1.0036

## Sheet: DENV1 and 3 Rep#1
Protein IDs	Peptide counts (all)	Protein names	Gene names	Sequence coverage [%]	Mol. weight [kDa]	Sequence length	DENV1 ratio	DENV1 ratio count	DENV3 ratio	DENV3 ratio count
Q96F86;H3BPN4;H3BSQ0	4;2;1	Enhancer of mRNA-decapping protein 3	EDC3	9.6	56.077	508	4.183	4	2.2396	4
Q9UN86-2;Q9UN86;D6RAC7;D6RB17;D6RGJ4;D6RBM9;D6REX8;D6RBR0;D6RE13;D6RBW8;D6R9X5;D6R9A4	11;11;6;6;5;4;4;4;4;4;2;2	Ras GTPase-activating protein-binding protein 2	G3BP2	34.5	50.817	449	3.8302	13	0.7717	12
A0A0A0MRP6;B7ZLQ5;P28370-2;P28370	11;11;10;10	Probable global transcription activator SNF2L1	SMARCA1	8.8	122.86	1058	3.0446	2	1.3083	2
Q14444-2;Q14444;A0A087X082;G3V153;E9PLA9	10;10;9;8;7	Caprin-1	CAPRIN1	15.6	76.861	694	2.7832	16	0.98259	16
Q14694;Q14694-3;Q14694-2;H3BQP1;J3KT19;H3BNS8	8;8;8;4;2;1	Ubiquitin carboxyl-terminal hydrolase 10	USP10	11.3	87.133	798	2.3833	6	1.032	6
Q6ZN17;Q6ZN17-2;Q9H9Z2	11;7;1	Protein lin-28 homolog B	LIN28B	49.6	27.083	250	2.1544	18	2.1298	18
H3BSK9;Q8WWM7-7;Q8WWM7-6;Q8WWM7-8;Q8WWM7-5;Q8WWM7-4;Q8WWM7-9;Q8WWM7-2;H3BUF6;Q8WWM7;Q8WWM7-3;H3BSQ5;H3BUE3	2;2;2;2;2;2;2;2;2;2;2;1;1	Ataxin-2-like protein	ATXN2L	7.7	37.138	336	2.0748	3	1.0745	3
P26196;Q8IV96	14;4	Probable ATP-dependent RNA helicase DDX6	DDX6	36.6	54.416	483	1.9908	20	1.4593	20
Q14191	2	Werner syndrome ATP-dependent helicase	WRN	1.3	162.46	1432	1.9855	2	1.6186	2
O14646-2;O14646	2;2	Chromodomain-helicase-DNA-binding protein 1	CHD1	1.1	196.59	1709	1.9691	2	1.816	2
Q96KR1;H0Y8W1	10;2	Zinc finger RNA-binding protein	ZFR	12.2	117.01	1074	1.9542	15	0.75224	15
Q2Q1W2	5	E3 ubiquitin-protein ligase TRIM71	TRIM71	7	93.384	868	1.9338	6	2.2574	6
Q9H1I8-3;Q9H1I8;Q9H1I8-2;B1AH59	3;3;2;1	Activating signal cointegrator 1 complex subunit 2	ASCC2	4.1	77.368	681	1.7607	3	1.0784	3
A0A087WYR0;P09132;A0A087WWU9;D6RBG4;P09132-2	6;6;3;1;1	Signal recognition particle 19 kDa protein	SRP19	45.8	13.654	120	1.7238	14	1.048	14
P49711-2;P49711;Q8NI51-11;Q8NI51-6;Q8NI51-5;Q8NI51-10;Q8NI51-2;Q8NI51-8;V9GY73;Q8NI51;Q8NI51-3;Q8NI51-7	4;4;1;1;1;1;1;1;1;1;1;1	Transcriptional repressor CTCF	CTCF	11	45.997	399	1.6984	8	1.3934	8
Q8N3C0;Q8N3C0-4;J3KNJ4;Q8N3C0-3;E5RFZ0	30;6;1;1;1	Activating signal cointegrator 1 complex subunit 3	ASCC3	14.6	251.46	2202	1.6787	28	1.2223	28
Q96GA3	1	Protein LTV1 homolog	LTV1	2.5	54.854	475	1.6246	2	1.1535	2
Q9Y6M1-1;Q9Y6M1;F8W930;Q9Y6M1-5;Q9Y6M1-6;Q9Y6M1-3;Q9Y6M1-4	16;16;16;12;12;12;12	Insulin-like growth factor 2 mRNA-binding protein 2	IGF2BP2	34.5	61.842	556	1.5901	14	0.79284	14
Q15527	6	Surfeit locus protein 2	SURF2	33.6	29.647	256	1.551	15	0.97059	15
O75534-2;O75534;O75534-3;O75534-4;E9PLT0;E9PNG3;E9PLD4;E9PJK7;E9PKN4	28;28;28;28;24;4;3;1;1	Cold shock domain-containing protein E1	CSDE1	40.2	85.746	767	1.5502	52	1.0977	52
Q9BPX5	2	Actin-related protein 2/3 complex subunit 5-like protein	ARPC5L	16.3	16.941	153	1.5445	2	1.3734	2
Q9Y3F4;Q9Y3F4-2;H0YH33	13;13;5	Serine-threonine kinase receptor-associated protein	STRAP	50.6	38.438	350	1.5318	22	1.0811	22
O14949	2	Cytochrome b-c1 complex subunit 8	UQCRQ	12.2	9.9062	82	1.5168	2	1.5247	2
Q9NP72;Q9NP72-3;Q5W0J0;A0A087X163;Q9NP72-2	2;1;1;1;1	Ras-related protein Rab-18	RAB18	12.6	22.977	206	1.5064	2	1.5354	2
F8VV04	18		SART3	28.5	89.04	771	1.5002	2	1.3951	2
P49458;E9PE20;P49458-2	7;4;4	Signal recognition particle 9 kDa protein	SRP9	64	10.112	86	1.4879	13	1.008	13
Q9UQ35;Q9UQ35-2;I3L3Q8;I3L4U6	20;5;2;1	Serine/arginine repetitive matrix protein 2	SRRM2	9.2	299.61	2752	1.4568	69	0.90774	69
D6RGI3;Q9NVA2;D6RER5;Q9NVA2-2;H0Y9G8;D6RDP1;D6R9Y6;H0Y961;D6RDU5	2;2;2;2;1;1;1;1;1	Septin-11	2016-09-11	6.8	49.005	425	1.4441	2	0.937	2
A0A087WUD1;Q6DD87	2;1	Zinc finger protein 787	ZNF787	8.1	40.428	382	1.4422	3	0.98172	3
P61086;D6RDM7;P61086-2;P61086-3	2;1;1;1	Ubiquitin-conjugating enzyme E2 K	UBE2K	11	22.406	200	1.4229	2	1.0403	2
Q15020;Q15020-4;Q15020-2;F8W667;F8VVK9;H0YHU8;F8VZM2;Q15020-3	24;23;7;5;3;3;3;2	Squamous cell carcinoma antigen recognized by T-cells 3	SART3	27.7	109.93	963	1.4213	46	1.2096	46
O43818	9	U3 small nucleolar RNA-interacting protein 2	RRP9	20.2	51.84	475	1.4124	9	0.9735	9
Q9P2I0;H0YJF4	2;1	Cleavage and polyadenylation specificity factor subunit 2	CPSF2	3.1	88.486	782	1.3994	2	0.92091	2
P37108;H0YLA2	6;5	Signal recognition particle 14 kDa protein	SRP14	41.2	14.57	136	1.3935	18	1.0178	18
P04181;P04181-2	2;1	Ornithine aminotransferase, mitochondrial;Ornithine aminotransferase, hepatic form;Ornithine aminotransferase, renal form	OAT	4.3	48.534	439	1.3874	2	1.3825	2
O43390;O43390-3;B4DT28	24;22;18	Heterogeneous nuclear ribonucleoprotein R	HNRNPR;HNRPR	43.9	70.942	633	1.386	50	0.77162	51
Q8NBJ5;M0QX72	3;1	Procollagen galactosyltransferase 1	COLGALT1	5.6	71.635	622	1.3775	4	1.0153	4
Q13464	2	Rho-associated protein kinase 1	ROCK1	1.4	158.17	1354	1.3683	2	1.5831	2
Q01085;Q01085-2	1;1	Nucleolysin TIAR	TIAL1	2.9	41.59	375	1.3622	2	1.2739	2
Q15717;Q15717-2;M0QZR9	7;7;1	ELAV-like protein 1	ELAVL1	20.2	36.091	326	1.3581	9	1.2613	9
Q01081;Q01081-2;M0QYK5;Q01081-3;M0R2N4;Q8WU68-3;Q8WU68-2;Q8WU68;Q01081-4;K7EJH3;K7EJM7	8;7;4;4;4;4;4;4;3;2;2	Splicing factor U2AF 35 kDa subunit;Splicing factor U2AF 26 kDa subunit	U2AF1;U2AF1L4	31.2	27.872	240	1.3333	7	1.0572	7
Q10570;A0A087X101	9;1	Cleavage and polyadenylation specificity factor subunit 1	CPSF1	6.9	160.88	1443	1.329	9	1.1346	9
Q4G0J3;Q4G0J3-3;D6RFF0;Q4G0J3-2;H0YA82;D6R9Z6;D6RF22;D6RF49;D6RAF3	10;10;6;4;4;3;1;1;1	La-related protein 7	LARP7	19.4	66.898	582	1.3261	14	0.9641	14
Q13283;E5RIZ6;E5RI46;E5RIF8;E5RH42;Q13283-2;E5RJU8;E5RH00	11;4;3;3;3;3;3;2	Ras GTPase-activating protein-binding protein 1	G3BP1	31.3	52.164	466	1.3231	17	1.0162	17
Q9HD40-3;Q9HD40;D6R969	3;3;1	O-phosphoseryl-tRNA(Sec) selenium transferase	SEPSECS	5.8	55.41	500	1.3222	4	0.98551	4
H0YAT2;Q9Y2Q9;E5RGC7;E5RK86;E5RFH3;H7C5V3;F5H0B0;H0YC42	2;2;1;1;1;1;1;1	28S ribosomal protein S28, mitochondrial	MRPS28;TPD52	13.3	15.791	143	1.3212	2	0.9027	2
H0Y723;E7EQB9;O15160-2;O15160;D6RDJ3	2;2;2;2;1	DNA-directed RNA polymerases I and III subunit RPAC1	POLR1C	19.3	15.953	140	1.3193	2	1.2784	2
Q9BRP1	1	Programmed cell death protein 2-like	PDCD2L	3.4	39.416	358	1.3118	2	1.284	2
Q5T179;P61024;Q9BZU3	2;2;1	Cyclin-dependent kinases regulatory subunit 1	CKS1B	38.8	8.027	67	1.3077	2	1.0458	2
Q15136;K7ERP6;P17612-2;P17612	1;1;1;1	cAMP-dependent protein kinase catalytic subunit alpha	KIN27;PRKACA	5.8	23.954	207	1.305	2	1.0837	2
Q9BUF5;K7ESM5;K7EL29;K7ESQ3;K7EQT3;K7EJ64;K7ERA8;K7EJZ4;K7ES63;K7EN98;K7EPE5	13;11;4;3;3;3;3;3;3;3;3	Tubulin beta-6 chain	TUBB6	35.9	49.857	446	1.3019	3	1.5081	3
Q9UGP8	3	Translocation protein SEC63 homolog	SEC63	3.4	87.996	760	1.3015	4	1.1872	4
G3V1B8;H0YEB6;O60232	2;2;2	Sjoegren syndrome/scleroderma autoantigen 1	SSSCA1	13.6	17.176	162	1.299	2	1.0705	2
D6R9P3;D6RD18;Q99729-3;D6RBZ0;A0A087WZV1;Q99729-2;Q99729-4;Q99729	10;10;10;10;10;10;9;9	Heterogeneous nuclear ribonucleoprotein A/B	HNRNPAB	36.1	30.302	280	1.2987	19	1.0031	19
P04350;M0R278;M0R042;M0QYM7;M0R1I1	16;4;3;3;2	Tubulin beta-4A chain	TUBB4A	49.8	49.585	444	1.2924	3	1.3734	3
O43809;H3BND3;H3BV41	8;5;3	Cleavage and polyadenylation specificity factor subunit 5	NUDT21	37	26.227	227	1.2855	10	1.2205	10
Q9H444	3	Charged multivesicular body protein 4b	CHMP4B	15.6	24.95	224	1.2854	4	1.0254	4
P25787;A0A024RA52;C9JCK5;H3BT36	5;5;2;1	Proteasome subunit alpha type-2	PSMA2	32.1	25.898	234	1.2853	4	1.1785	4
B1AJY5;B1AJY7;O75832;B1AJY6;O75832-2	2;2;2;1;1	26S proteasome non-ATPase regulatory subunit 10	PSMD10	9.7	20.217	185	1.2827	2	0.99675	2
Q13242;H0YIB4;S4R3G0	3;2;2	Serine/arginine-rich splicing factor 9	SRSF9	13.6	25.542	221	1.278	5	0.88861	5
P22102;P22102-2	2;1	Trifunctional purine biosynthetic protein adenosine-3;Phosphoribosylamine--glycine ligase;Phosphoribosylformylglycinamidine cyclo-ligase;Phosphoribosylglycinamide formyltransferase	GART	2	107.77	1010	1.2722	3	1.0358	3
P10155-3;P10155-5;P10155-4;P10155;P10155-2;H0Y9N5;G5E9R9	8;8;8;8;3;2;2	60 kDa SS-A/Ro ribonucleoprotein	TROVE2	18	58.482	518	1.2703	14	1.0287	14
CON__P07744	3			4.2	56.283	525	1.2699	2	1.0855	2
P31942-2;P31942;P31942-3;P31942-4;P31942-6;P31942-5	6;6;5;3;2;2	Heterogeneous nuclear ribonucleoprotein H3	HNRNPH3	22.7	35.238	331	1.2688	13	0.98567	13
Q9UN81	4		ORF1	13.6	40.055	338	1.2668	5	0.9398	5
O43324;O43324-2;D6RBD7;C9J1V9;H0YAL7;D6RCQ0;H0YAH9	7;5;5;5;4;2;1	Eukaryotic translation elongation factor 1 epsilon-1	EEF1E1;hCG_2043275	40.8	19.81	174	1.2667	12	1.1149	12
Q13442;F8WBW6	6;1	28 kDa heat- and acid-stable phosphoprotein	PDAP1	27.1	20.63	181	1.2666	7	1.0923	7
Q15800-2;Q15800;D6RDP9;D6R952	2;2;1;1	Methylsterol monooxygenase 1	MSMO1	13	19.47	162	1.2618	2	1.3334	2
Q9P287-4;Q9P287-3;Q9P287;Q9P287-2	1;1;1;1	BRCA2 and CDKN1A-interacting protein	BCCIP	2.7	33.242	292	1.2605	2	1.2264	2
Q9H9Y6-5;Q9H9Y6-2;Q9H9Y6;Q9H9Y6-3;F8WDS4;F8WAK7;F8WBB9;F8WCS3;C9JJG2;C9JS83;Q9H9Y6-4	2;2;2;2;1;1;1;1;1;1;1	DNA-directed RNA polymerase I subunit RPA2	POLR1B	2.3	107.86	952	1.2605	4	0.90839	4
Q12904;Q12904-2;D6R937	5;5;1	Aminoacyl tRNA synthase complex-interacting multifunctional protein 1;Endothelial monocyte-activating polypeptide 2	AIMP1	24	34.352	312	1.258	7	1.0789	7
P24534;F8WF65;F2Z2G2;C9JZW3	4;1;1;1	Elongation factor 1-beta	EEF1B2	25.3	24.763	225	1.258	4	1.0016	4
P82912-2;P82912;H0YL99;P82912-3	2;2;1;1	28S ribosomal protein S11, mitochondrial	MRPS11	16.1	20.459	193	1.2543	2	0.85482	2
R4GMP8;Q6IQ42;O75494-5;Q5JRI1;O75494-4;O75494-6;O75494-3;O75494-2;O75494	1;1;1;1;1;1;1;1;1	Serine/arginine-rich splicing factor 10	SRSF10;FUSIP1	30	4.6261	40	1.2504	3	0.8505	3
B8ZZU8;Q15370;Q15370-2;I3L0M9	3;3;3;2	Transcription elongation factor B polypeptide 2	TCEB2	32.7	12.527	113	1.2493	3	1.2949	3
H3BPF6;Q99471;Q99471-2;H3BMQ1;Q99471-3	2;2;1;1;1	Prefoldin subunit 5	PFDN5	15.1	17.047	152	1.2426	2	1.0511	2
F8VSA6;E9PS38;Q15843;S4R3E9;E9PL57	2;2;2;2;2	NEDD8	NEDD8;NEDD8-MDP1	46	5.8668	50	1.2416	2	1.07	2
O94992	1	Protein HEXIM1	HEXIM1	4.7	40.623	359	1.2404	2	0.8173	2
P25440-4;P25440-3;P25440;H0Y6K2;P25440-2;A0A0G2JK44;A0A0G2JHN8;H0YDJ7;U3KPW0;E9PIQ3;U3KQA6;A0A0G2JHL0	5;5;5;5;5;5;4;1;1;1;1;1	Bromodomain-containing protein 2	BRD2	8.1	74.88	681	1.2397	4	0.7179	4
Q9H2M9	3	Rab3 GTPase-activating protein non-catalytic subunit	RAB3GAP2	2.5	155.98	1393	1.2385	3	1.0555	3
P25815	2	Protein S100-P	S100P	24.2	10.4	95	1.2383	4	1.2526	4
O15173;O15173-2;U3KQM0;O00264	2;2;1;1	Membrane-associated progesterone receptor component 2;Membrane-associated progesterone receptor component 1	PGRMC2;PGRMC1	7.6	23.818	223	1.2381	3	1.2054	3
O43592	2	Exportin-T	XPOT	2.1	109.96	962	1.2359	2	1.3556	2
P30049	2	ATP synthase subunit delta, mitochondrial	ATP5D	13.7	17.49	168	1.2357	2	1.1033	2
K7ENP1;Q7Z4G4-3;Q7Z4G4-2;Q7Z4G4;Q5JY02;K7EPZ4;K7EJQ4;Q5JY01	3;3;3;3;2;1;1;1	tRNA (guanine(10)-N2)-methyltransferase homolog	TRMT11	15.7	26.453	230	1.2332	3	0.8848	3
P28070	3	Proteasome subunit beta type-4	PSMB4	12.5	29.204	264	1.2328	6	1.3218	6
Q9NV31	2	U3 small nucleolar ribonucleoprotein protein IMP3	IMP3	13.6	21.85	184	1.2328	3	1.0218	3
P30048-2;P30048	6;6	Thioredoxin-dependent peroxide reductase, mitochondrial	PRDX3	26.1	25.838	238	1.2316	11	1.2395	11
P14866;M0QXS5;P14866-2;M0QYT0;M0R1W6;M0R076;B4DVF8;M0QYL7;H7C464;Q8WVV9-5;B7WPG3;Q8WVV9-4;C9IYN3;Q8WVV9;D6W592	16;15;14;8;4;3;3;2;1;1;1;1;1;1;1	Heterogeneous nuclear ribonucleoprotein L	HNRNPL	35.7	64.132	589	1.2303	56	1.08	56
F8VYE8;P36873;P36873-2;F8VR82;F8W0W8;A0A087WYY5	12;12;12;11;11;8	Serine/threonine-protein phosphatase;Serine/threonine-protein phosphatase PP1-gamma catalytic subunit	PPP1CC	48.7	34.95	304	1.2302	2	1.3929	2
H0YAB3;H0Y9K1;H0Y8V7	8;4;3		SEC31A	21.2	48.871	443	1.2296	3	1.0711	3
Q9NP81;M0QWZ7;Q9NP81-2;B4DJM9;M0R2C6;M0R2H5;M0QX29;M0R259	3;3;3;2;2;1;1;1	Serine--tRNA ligase, mitochondrial	SARS2	8.7	58.282	518	1.2291	3	0.97076	3
C9JBJ7;C9K057;C9J4Z7;F8VXW2;C9JEY1;C9JQM8;C9JFG9;C9J6C8;O15143;C9JM51;F8WEB3;C9JTT6	2;2;2;2;2;2;2;2;2;1;1;1	Actin-related protein 2/3 complex subunit 1B	ARPC1B	26.5	11.781	102	1.2289	2	1.1267	2
Q9H000-2;C9J494;Q9H000	2;2;2	Probable E3 ubiquitin-protein ligase makorin-2	MKRN2	5.4	41.984	373	1.2281	2	0.98356	2
E9PRK8;E9PKY7;P02794;G3V192;E9PQR3;E9PPQ4;E9PKM5;E9PK45;G3V1D1	3;3;3;2;1;1;1;1;1	Ferritin;Ferritin heavy chain	FTH1	31.6	11.168	95	1.2261	11	0.9846	11
Q9Y5L4;K7EIT2	4;3	Mitochondrial import inner membrane translocase subunit Tim13	TIMM13	53.7	10.5	95	1.2258	3	1.1927	3
Q15075	15	Early endosome antigen 1	EEA1	12.3	162.46	1411	1.2218	17	1.0659	17
A0A0J9YXC7;A0A0M3HER1;P48059;P48059-4;P48059-2;P48059-5;P48059-3	2;1;1;1;1;1;1	LIM and senescent cell antigen-like-containing domain protein 1	LIMS1	5.5	45.724	398	1.2202	2	1.0931	2
Q96SI9-2;Q96SI9;H0YC91	12;12;1	Spermatid perinuclear RNA-binding protein	STRBP	16.3	71.966	658	1.2196	6	0.47298	6
J3QQY2;Q9UM00-2;Q9UM00;J9JIE6;J3KS45	2;2;2;2;1	Transmembrane and coiled-coil domain-containing protein 1	TMCO1	22.1	11.372	104	1.2187	3	1.2795	3
O15226;O15226-2;A0A087WXT2	2;2;1	NF-kappa-B-repressing factor	NKRF	2.6	77.672	690	1.2183	2	0.68029	2
P61923;F8VVA7;F8VXB1;F8VUC5;F8W156;F8W651;P61923-5;F8VYZ4;P61923-4;F8VXR1;F8VYK5;P61923-2;P61923-3	4;4;3;3;3;3;3;3;3;2;1;1;1	Coatomer subunit zeta-1	COPZ1	30.5	20.198	177	1.2175	5	1.1128	5
A0A0A0MSK6;Q13017-2;Q13017	3;3;3	Rho GTPase-activating protein 5	ARHGAP5	2.1	171.68	1498	1.2161	3	1.296	3
P02792;A0A087X1B9	4;3	Ferritin light chain	FTL	21.7	20.019	175	1.2159	9	0.93683	9
P47813;X6RAC9;O14602;A6NJH9	7;5;5;4	Eukaryotic translation initiation factor 1A, X-chromosomal;Eukaryotic translation initiation factor 1A, Y-chromosomal	EIF1AX;EIF1AY	38.9	16.46	144	1.214	13	1.0908	13
P61457	2	Pterin-4-alpha-carbinolamine dehydratase	PCBD1	22.1	11.999	104	1.2109	3	1.0539	3
Q92616	11	Translational activator GCN1	GCN1L1	4.2	292.75	2671	1.2099	8	1.2245	8
A0A087WUL2;P49720;A0A087WXQ8;A0A087WY10	5;5;4;4	Proteasome subunit beta type-3	PSMB3	44.1	16.161	145	1.2089	5	1.0265	5
O60763;O60763-2	7;7	General vesicular transport factor p115	USO1	8.6	107.89	962	1.2075	5	1.2976	5
Q16630-3;F8WJN3;Q16630;Q16630-2;F8W084	6;6;6;6;1	Cleavage and polyadenylation specificity factor subunit 6	CPSF6	16.1	52.325	478	1.2064	6	1.1393	6
O75348;O95670-2;F2Z307;O95670	2;1;1;1	V-type proton ATPase subunit G 1;V-type proton ATPase subunit G 2	ATP6V1G1;ATP6V1G2;ATP6V1G2-DDX39B	22	13.757	118	1.2051	2	1.0261	2
O60264	20	SWI/SNF-related matrix-associated actin-dependent regulator of chromatin subfamily A member 5	SMARCA5	19	121.9	1052	1.2047	19	0.87717	19
Q5T280	1	Uncharacterized protein C9orf114	C9orf114	2.9	42.008	376	1.2038	2	1.1414	2
O76094;O76094-2;R4GNC1;D6RDY6	30;28;14;12	Signal recognition particle subunit SRP72	SRP72	48.1	74.605	671	1.2028	60	0.92696	60
P51665;H3BNT7;H3BTM8;H3BQV2	6;3;3;2	26S proteasome non-ATPase regulatory subunit 7	PSMD7	20.4	37.025	324	1.2018	9	1.165	9
Q9UK22;R4GNH2	5;2	F-box only protein 2	FBXO2	20.6	33.327	296	1.2009	4	1.0274	4
P51572;P51572-2	2;2	B-cell receptor-associated protein 31	BCAP31	7.3	27.991	246	1.2006	2	1.2156	2
Q5JRC6;Q8IWS0-5;Q8IWS0-3;Q8IWS0;A0A0D9SGE8;Q8IWS0-4;Q8IWS0-2	3;3;3;3;3;2;2	PHD finger protein 6	PHF6	10.5	36.43	324	1.2006	4	1.0525	4
P46777;Q5T7N0;R4GNJ2	17;4;1	60S ribosomal protein L5	RPL5	46.1	34.362	297	1.1998	53	0.819	53
C9JAW5;Q9Y241;C9JNU6	1;1;1	HIG1 domain family member 1A, mitochondrial	HIGD1A	21.7	8.8131	83	1.1963	2	1.0574	2
Q9Y383-3;A0A0A6YYC3;Q9Y383-2;Q9Y383;Q96HJ9-2;A0A0A6YYJ8;A8MYV2;Q9NQ29-2;Q9NQ29-3;Q9NQ29;B8ZZ10;B8ZZ12;B8ZZ09	6;6;6;6;6;6;3;3;3;3;2;1;1	Putative RNA-binding protein Luc7-like 2;Putative RNA-binding protein Luc7-like 1	LUC7L2;LUC7L	19	46.228	389	1.1931	6	1.0489	6
A6NF51;F8VVW8;F8VZG4;F8W1J0;O95861-4;O95861;O95861-2	2;1;1;1;1;1;1	3(2),5-bisphosphate nucleotidase 1	BPNT1	6.9	31.707	291	1.1863	2	1.1838	2
Q8NC51-3;Q8NC51;Q8NC51-4;Q8NC51-2	14;14;13;13	Plasminogen activator inhibitor 1 RNA-binding protein	SERBP1	41.2	43.135	393	1.1859	42	1.1767	42
Q8N0T1;A0A087WWE7	2;1	Uncharacterized protein C8orf59	C8orf59	22	11.456	100	1.1837	3	0.89925	3
Q9H6R4-4;Q9H6R4;Q9H6R4-2;A0A0A0MRW6;Q9H6R4-3;A0A0C4DFX0	10;10;9;9;6;1	Nucleolar protein 6	NOL6	11.4	127.32	1143	1.1837	15	0.86242	15
Q9UHB9;Q9UHB9-4;Q9UHB9-2;Q9UHB9-3;K7EN53;K7EQC2	30;28;28;14;2;2	Signal recognition particle subunit SRP68	SRP68	53.6	70.729	627	1.1835	47	0.90296	46
Q13895;H7BY94	2;1	Bystin	BYSL	3.9	49.601	437	1.1829	2	0.89299	2
P55769;B1AHD1	6;6	NHP2-like protein 1;NHP2-like protein 1, N-terminally processed	NHP2L1	40.6	14.173	128	1.1782	10	1.0037	10
Q14978;Q14978-3;A0A0A0MRM9;Q14978-2;S4R349;S4R402;S4R341;S4R3C2	15;15;15;15;6;2;2;2	Nucleolar and coiled-body phosphoprotein 1	NOLC1	19.2	73.602	699	1.1782	66	0.82128	66
P20618	3	Proteasome subunit beta type-1	PSMB1	13.3	26.489	241	1.1775	6	1.0869	6
P82921;A0A075B746	1;1	28S ribosomal protein S21, mitochondrial	MRPS21	16.1	10.741	87	1.1764	2	1.259	2
Q5HYB6;P06753-2;P06753-5;A0A087WWU8;P06753-3;P06753-6;P06753-4;Q5VU61;D6R904;D6RFM2	14;14;13;12;12;12;11;10;7;3	Tropomyosin alpha-3 chain	DKFZp686J1372;TPM3	45.7	27.175	232	1.1757	8	1.0813	8
P41743	2	Protein kinase C iota type	PRKCI	4.5	68.262	596	1.1756	2	1.2476	2
E9PAR2;Q03060-23;Q03060-9;Q03060-24;Q03060-8;P18846-2;P16220-3;Q03060-32;Q03060-26;G5E998;P18846;Q03060-21;Q03060-31;P16220-2;P16220;Q03060-6	1;1;1;1;1;1;1;1;1;1;1;1;1;1;1;1	Cyclic AMP-dependent transcription factor ATF-1;Cyclic AMP-responsive element-binding protein 1	CREM;ATF1;CREB1	9.5	10.918	95	1.1747	2	1.1088	2
P60468;S4R3B5	2;1	Protein transport protein Sec61 subunit beta	SEC61B	26	9.9743	96	1.1718	3	1.1217	3
Q9P2J5;Q9P2J5-2;Q9P2J5-3;A0A087WXY1	25;24;10;4	Leucine--tRNA ligase, cytoplasmic	LARS	23	134.46	1176	1.1711	23	1.0786	23
C9JQ41;H7C525;Q4VC31	2;2;2	Coiled-coil domain-containing protein 58	CCDC58	21.5	15.296	130	1.169	2	1.2236	2
P12004	9	Proliferating cell nuclear antigen	PCNA	44.4	28.768	261	1.1687	12	1.0896	12
Q92572;F5H459	5;2	AP-3 complex subunit sigma-1	AP3S1	27.5	21.732	193	1.1669	5	1.0648	5
E9PQH6;Q5JR08;P08134	6;6;6	Rho-related GTP-binding protein RhoC	RHOC	37.9	19.224	169	1.1658	7	1.2279	7
F5GYN4;Q96FW1;J3KR44;F5H6Q1;F5GYJ8;F5H3F0;Q96FW1-2	2;2;2;2;2;1;1	Ubiquitin thioesterase OTUB1	OTUB1	9.1	28.05	241	1.1656	2	1.1812	2
B9ZVN9;O95602	12;12	DNA-directed RNA polymerase;DNA-directed RNA polymerase I subunit RPA1	POLR1A	7.9	187.81	1659	1.1642	10	1.0363	10
Q14789-4;Q14789-3;Q14789;Q14789-2;E7EU81;H0Y867	3;3;3;3;2;1	Golgin subfamily B member 1	GOLGB1	0.8	367.42	3184	1.1641	3	1.2095	3
P28072;I3L3X7;A0A087X2I4	3;1;1	Proteasome subunit beta type-6	PSMB6	13	25.357	239	1.1639	5	1.1556	5
P25788-2;P25788;G3V3W4;G3V5N4;G3V4X5	4;4;2;2;1	Proteasome subunit alpha type-3	PSMA3	20.2	27.647	248	1.1638	3	1.0259	3
P30046;P30046-2;J3KQ18;A6NHG4;B5MC82;H7C342	6;5;5;5;5;1	D-dopachrome decarboxylase;D-dopachrome decarboxylase-like protein	DDT;DDTL	47.5	12.712	118	1.163	10	1.0512	10
Q8WZ42-5;Q8WZ42-11;Q8WZ42-4;Q8WZ42-7;Q8WZ42-2;Q8WZ42;Q8WZ42-8;Q8WZ42-13;Q8WZ42-12;A0A0A0MTS7;Q8WZ42-6;Q8WZ42-3;Q8WZ42-10;Q8WZ42-9;A0A0A0MRA3	2;2;2;2;2;2;2;2;2;2;1;1;1;1;1	Titin	TTN	0	3653	32900	1.1625	2	1.3007	2
D6RCR4;D6RFI1;D6R9W4;Q16643;Q16643-2;Q16643-3	1;1;1;1;1;1	Drebrin	DBN1	16.1	10.06	93	1.1624	2	0.94591	2
P07919;A0A096LP55	3;1	Cytochrome b-c1 complex subunit 6, mitochondrial	UQCRH	38.5	10.739	91	1.1623	3	1.2143	3
Q9NP97;Q8TF09;B1AKR6;H3BNG9;H3BPA0;Q9NP97-2;Q7Z4M1;H3BQI1	3;2;2;1;1;1;1;1	Dynein light chain roadblock-type 1;Dynein light chain roadblock-type 2	DYNLRB1;DYNLRB2	38.5	10.921	96	1.1615	4	1.1936	4
A0A0B4J1W3;Q9BXJ9;Q9BXJ9-4	5;5;3	N-alpha-acetyltransferase 15, NatA auxiliary subunit	NAA15	5.2	101.2	865	1.1615	5	1.103	5
Q15021;E7EN77	4;2	Condensin complex subunit 1	NCAPD2	3.2	157.18	1401	1.1608	4	1.143	4
O60568;H7C2V1;H7C0B8;H7C2A8;C9JU11;H7C2S8	3;2;1;1;1;1	Procollagen-lysine,2-oxoglutarate 5-dioxygenase 3	PLOD3	3.7	84.784	738	1.1598	5	0.90333	5
P05783;F8VZY9;CON__H-INV:HIT000015463;CON__Q92764;C4AM86;Q92764;CON__Q497I4;Q14525;CON__Q14525;A0A087X2I6;Q15323;CON__Q9UE12;CON__Q15323;CON__A2A5Y0;O76013-2;Q14532;CON__Q14532;O76014;CON__A2AB72;O76013;CON__O76013;CON__O76014;CON__REFSEQ:XP_986630	25;24;2;2;2;2;2;1;1;1;1;1;1;1;1;1;1;1;1;1;1;1;1	Keratin, type I cytoskeletal 18	KRT18	60	48.057	430	1.1577	71	0.96178	71
Q969H8;M0QYN0;M0QXF7	4;3;2	UPF0556 protein C19orf10	C19orf10	30.1	18.795	173	1.157	4	1.0389	4
E9PF10;O75694-2;O75694	9;9;9	Nuclear pore complex protein Nup155	NUP155	8.5	148.09	1327	1.1568	8	1.0778	8
O00410;H0Y8C6;O00410-3;O00410-2;C9JMV5;E7ETV3;E7EQT5;E7EV12;H0Y3V4;C9JZD8;C9J875;C9JZ53;C9JQT6;E7ESA1;E7ESZ1;E7EWK4;E7EX05;E7ETV8;O60518	9;9;9;8;3;3;2;2;2;1;1;1;1;1;1;1;1;1;1	Importin-5	IPO5	8.9	123.63	1097	1.1567	14	1.1446	14
F2Z2Y6;O95777;C9JNV3;C9JIZ0	4;4;3;2	N-alpha-acetyltransferase 38, NatC auxiliary subunit	NAA38	64.2	7.3713	67	1.1567	3	1.0692	3
Q9UKN8	2	General transcription factor 3C polypeptide 4	GTF3C4	2.6	91.981	822	1.1561	2	1.154	2
Q9BVC6	2	Transmembrane protein 109	TMEM109	8.6	26.21	243	1.1556	3	1.1352	3
Q13155;A8MU58;F8W950	5;4;4	Aminoacyl tRNA synthase complex-interacting multifunctional protein 2	AIMP2	27.2	35.348	320	1.1554	7	0.91938	7
P11413;P11413-3;P11413-2;E7EUI8;E7EM57;E9PD92	9;9;9;8;7;6	Glucose-6-phosphate 1-dehydrogenase	G6PD	20.2	59.256	515	1.1551	9	1.1773	9
P68133;P68032;P63267;P62736;A6NL76;C9JUM1;F8WB63;B8ZZJ2;C9JFL5;F6UVQ4;F6QUT6;P63267-2;F8WCH0	13;13;12;12;11;8;8;8;8;8;8;7;3	Actin, alpha skeletal muscle;Actin, alpha cardiac muscle 1;Actin, gamma-enteric smooth muscle;Actin, aortic smooth muscle	ACTA1;ACTC1;ACTG2;ACTA2;ACTB	31.8	42.051	377	1.1546	6	0.98523	6
F8W785;O00461	2;2	Golgi integral membrane protein 4	GOLIM4	4	78.759	668	1.1544	5	1.0551	5
C9JLU1;P52434;P52434-3;P52434-2;P52434-4;P52434-5	3;3;2;2;2;1	DNA-directed RNA polymerases I, II, and III subunit RPABC3	POLR2H	25.7	16.925	148	1.1534	4	1.0401	4
Q99436;Q99436-2;Q5TBG5	4;1;1	Proteasome subunit beta type-7	PSMB7	18.1	29.965	277	1.1534	3	0.93527	3
G5E9W7;G5E9V5;P82650;H7C5L9	3;3;3;2	28S ribosomal protein S22, mitochondrial	MRPS22	9.4	36.805	319	1.153	3	0.80905	3
P47897;P47897-2;H7C0R3;C9J165;F2Z2V6	29;27;11;8;3	Glutamine--tRNA ligase	QARS	41.8	87.798	775	1.1529	52	1.016	52
P05787;CON__P05787;P05787-2;F8VUG2;F8W1U3;CON__H-INV:HIT000292931;CON__Q9H552;F8VP67;F8VRG4;F8W0C6;CON__H-INV:HIT000016045;CON__Q9DCV7;P08729;CON__Q3KNV1;CON__P08729;Q9NSB2;CON__Q9NSB2;CON__Q6ISB0;H7C5W5;CON__REFSEQ:XP_092267;P41219;P41219-2;Q8IWY7;H0YIB2;H0YHD9;U3KPR1;B4DIR1;F8VQY3;K7ELP4;F8VS61;K7EJU1;K7EKH9;Q86Y46-2;Q8N1N4-2;Q14CN4-3;CON__Q61726;A0A087X106;O43790;CON__O43790;P78385;CON__Q6NT21…	32;32;32;19;16;16;14;12;8;6;5;4;4;4;4;3;3;3;2;2;2;2;2;1;1;1;1;1;1;1;1;1;1;1;1;1;1;1;1;1;1;1;1;1;1;1;1;1;1;1;1;1;1;1;1;1;1;1;1;1	Keratin, type II cytoskeletal 8	KRT8	55.1	53.704	483	1.1519	95	0.98954	95
P56192;P56192-2;H0YHV5;F5H2V6;H0YIP0;H0YIC2;F8VS26;F8W0M7;F8W0S4;F8VZZ9;F8VPL7;H0YHL6;H0YI94;H0YI27	23;16;7;4;4;2;2;2;2;2;1;1;1;1	Methionine--tRNA ligase, cytoplasmic	MARS	33.3	101.11	900	1.1512	29	1.0908	29
P61011;P61011-2;G3V4F7;G3V480;G3V346;A0A0D9SFN7;G3V3L9	16;13;12;4;2;2;2	Signal recognition particle 54 kDa protein	SRP54	33.9	55.704	504	1.1503	27	0.91672	27
O00566	2	U3 small nucleolar ribonucleoprotein protein MPP10	MPHOSPH10	4.7	78.863	681	1.1501	2	0.92455	2
E9PK01;P29692;P29692-3;P29692-2;E9PRY8;E9PPR1;E9PL12;E9PQ49;E9PI39;A0A087X1X7;E9PMW7;E9PL71;E9PQZ1;P29692-4;E9PN91;E9PIZ1;H0YCK7;H0YE58;E9PK06;H0YE72;E9PNW6;E9PQC9;E9PKK3;E9PK72;E9PJD0	7;7;6;6;6;5;5;5;5;5;4;4;4;4;3;3;3;2;2;2;1;1;1;1;1	Elongation factor 1-delta	EEF1D	36	28.821	261	1.1494	9	1.0628	9
Q9GZS3;H0YMF9;H0YN81;H0YL19;H0YM76	4;3;3;2;1	WD repeat-containing protein 61	WDR61	23.9	33.58	305	1.1492	3	0.92535	3
Q12931-2;Q12931;I3L239;I3L0K7	3;3;1;1	Heat shock protein 75 kDa, mitochondrial	TRAP1	5.7	74.267	651	1.1485	3	1.1358	3
P52292;J3QLL0;J3KS65;J3QL07	13;6;6;1	Importin subunit alpha-1	KPNA2	29.5	57.861	529	1.1482	23	0.98086	23
Q9Y5J7;G3V2F3;G3V502	2;1;1	Mitochondrial import inner membrane translocase subunit Tim9	TIMM9	29.2	10.378	89	1.1475	2	1.0202	2
Q02790	3	Peptidyl-prolyl cis-trans isomerase FKBP4;Peptidyl-prolyl cis-trans isomerase FKBP4, N-terminally processed	FKBP4	9.6	51.804	459	1.1473	6	1.2925	6
P22626;P22626-2;A0A087WUI2	20;19;16	Heterogeneous nuclear ribonucleoproteins A2/B1	HNRNPA2B1	53.3	37.429	353	1.146	74	1.1329	74
P52788-2;P52788;H7C2R7	2;2;1	Spermine synthase	SMS	8.3	35.278	313	1.1453	2	1.3631	2
P56385	3	ATP synthase subunit e, mitochondrial	ATP5I	50.7	7.9331	69	1.145	3	1.1191	3
Q96PK6;Q96PK6-2;Q96PK6-3;A0A0A6YYI9;Q96PK6-4;F8WDX3;A0A0A0MSL8;B8ZZ74;Q96PK6-5	7;5;3;3;3;3;3;3;3	RNA-binding protein 14	RBM14	11.5	69.491	669	1.1447	10	1.0089	10
A0A024R4E5;Q00341;Q00341-2;H0Y394;H7C0A4;C9JIZ1;C9J5E5;C9JZI8;C9JHS7;C9JHZ8;C9JES8;C9JT62;C9JK79;C9JBS3;C9JEJ8;C9JHN6;H7BZC3;H7C2D1;C9JMQ6;C9JQ82;C9JHS9;C9J739;H7C3D0	29;28;25;20;12;10;9;8;7;7;7;4;4;3;3;3;3;3;2;2;1;1;1	Vigilin	HDLBP	27.8	141.44	1268	1.1428	28	1.1164	28
P28066;P28066-2	5;3	Proteasome subunit alpha type-5	PSMA5	22	26.411	241	1.1427	5	1.0921	5
Q86V81;E9PB61	3;2	THO complex subunit 4	ALYREF	16.3	26.888	257	1.1419	7	1.1696	7
Q5VTU8;P56381	2;2	ATP synthase subunit epsilon-like protein, mitochondrial;ATP synthase subunit epsilon, mitochondrial	ATP5EP2;ATP5E	29.4	5.8068	51	1.1419	2	0.98044	2
Q5T123;Q9H299;A0A087WV23	1;1;1	SH3 domain-binding glutamic acid-rich-like protein 3	SH3BGRL3	11.4	9.3804	88	1.1402	2	1.1499	2
P02545-2;Q3BDU5;Q5TCI8	35;30;27	Prelamin-A/C;Lamin-A/C	LMNA	62.6	65.134	572	1.1402	2	0.92637	2
F5GWX5;Q14839;A0A0C4DGG9;Q14839-2;Q8TDI0;K7EMY3;Q12873-2;Q12873;Q12873-3;K7EPV1;K7ESA5;I3L229;H7C3H7;H7C0J3;F2Z2R5	12;12;12;12;8;6;5;5;5;1;1;1;1;1;1	Chromodomain-helicase-DNA-binding protein 4;Chromodomain-helicase-DNA-binding protein 5	CHD4;CHD5	6.4	217.1	1905	1.1388	14	1.1013	14
Q9HB71-3;Q9HB71	3;3	Calcyclin-binding protein	CACYBP	14.6	21.228	185	1.1387	3	1.1662	3
O00488;A9J4F5	3;1	Zinc finger protein 593	ZNF593	33.6	15.199	134	1.1386	4	0.86797	4
I3L2B0;K7EIG1;O75153	3;3;3	Clustered mitochondria protein homolog	CLUH	2.5	138.23	1236	1.1384	2	0.9548	2
F8W1R7;P60660-2;P60660;G3V1V0;J3KND3;G8JLA2;B7Z6Z4;G3V1Y7;F8VPF3;F8VZU9;F8W180;H0YI43;F8W1I5;P14649;F8VXL3	7;7;7;7;6;6;6;5;5;3;3;2;2;2;1	Myosin light polypeptide 6	MYL6	46.9	16.29	145	1.1379	12	1.077	12
P51571;A6NLM8	4;2	Translocon-associated protein subunit delta	SSR4	25.4	18.998	173	1.1376	8	1.0562	8
P53582;H0Y955;H0Y9L0;D6RF24;H0Y903	3;2;1;1;1	Methionine aminopeptidase 1	METAP1	12.7	43.215	386	1.1365	4	1.0072	4
F8VWU4;F8VVZ0;F8VUA5;F8VVK3;K7ERI8;P61020-2;P20339-2;P61020;P20339;P51148;P51148-2;K7ERQ8;F8WCY6;F8WD79;F8VPW9;F8VSF8;F8VWZ7;K7ENY4	2;2;2;2;2;2;2;2;2;2;2;2;1;1;1;1;1;1	Ras-related protein Rab-5B;Ras-related protein Rab-5A;Ras-related protein Rab-5C	RAB5C;RAB5B;RAB5A	24.2	9.9152	91	1.1362	2	1.1325	2
H9KV28;O60610-2;O60610-3;O60610;A0A0G2JH68	7;7;7;7;7	Protein diaphanous homolog 1	DIAPH1	7.1	136.85	1228	1.1355	6	1.0488	6
Q71RC2-6;Q71RC2-5;Q71RC2-3;Q71RC2;Q71RC2-4;X6RLN4;Q71RC2-2;F8W1I4;Q8TBL5;A0A087WTL9;F8VY40;Q6P4E2;Q96J85;Q71RC2-7	3;3;3;3;3;2;2;1;1;1;1;1;1;1	La-related protein 4	LARP4	5.5	72.733	653	1.1355	5	0.97876	5
Q96FJ2	4	Dynein light chain 2, cytoplasmic	DYNLL2	33.7	10.35	89	1.1338	2	1.1056	2
A8MXL6;P55735-2;P55735;A0A0C4DFR6;P55735-3;E7ERC8	4;4;4;4;4;1	Protein SEC13 homolog	SEC13	16.9	31.595	284	1.1333	3	1.0364	3
Q86U42-2;Q86U42;B4DEH8;G3V4T2;Q92843-2;H0YJH9	3;3;2;2;2;1	Polyadenylate-binding protein 2	PABPN1	11.8	31.496	296	1.1332	5	1.0487	5
P46379-4;P46379-5;A0A0G2JL47;P46379-2;A0A024RCR6;P46379;A0A0G2JK23;P46379-3;F6S6P2;X6REW1;A0A0G2JJM1;F6TC96;F6UR09;F6U1F2;F6XTU0;A0A0G2JJR8;A0A0K0K1A2;F6WML8;F6VEM6;F6X9W3;F6U341	3;3;3;3;3;3;3;3;2;2;2;1;1;1;1;1;1;1;1;1;1	Large proline-rich protein BAG6	BAG6	3.9	96.798	903	1.1316	3	1.0668	3
P78559;P78559-2;E9PGC8	20;20;20	Microtubule-associated protein 1A;MAP1A heavy chain;MAP1 light chain LC2	MAP1A	8.1	305.48	2803	1.1311	25	1.1284	25
K7EJR3;R4GMR5;P48556;K7EJC1;K7ERW6;K7ENY6	3;3;3;2;1;1	26S proteasome non-ATPase regulatory subunit 8	PSMD8	13.2	28.065	250	1.1307	3	1.1625	3
P28074;P28074-3;H0YJM8;P28074-2	7;5;3;3	Proteasome subunit beta type-5	PSMB5	27.8	28.48	263	1.1298	11	1.0877	11
P32119;A6NIW5;P32119-2	9;5;2	Peroxiredoxin-2	PRDX2	43.9	21.892	198	1.1293	16	1.0822	16
O95373	9	Importin-7	IPO7	11.1	119.52	1038	1.1286	15	1.0907	15
P27348;E9PG15	9;5	14-3-3 protein theta	YWHAQ	42.9	27.764	245	1.1284	8	1.0155	8
P05198;H0YJS4;G3V4T5	11;9;9	Eukaryotic translation initiation factor 2 subunit 1	EIF2S1	40.3	36.112	315	1.1283	10	1.1187	10
F5GX77;Q9UI30-2;Q9UI30;F5GYQ2	3;3;3;1	tRNA methyltransferase 112 homolog	TRMT112	36.8	11.972	106	1.1281	6	1.1853	6
P60900;G3V5Z7;G3V295;P60900-2;G3V3U4;G3V3I1;P60900-3;H0YJC4	6;6;5;5;4;4;2;1	Proteasome subunit alpha type-6;Proteasome subunit alpha type	PSMA6	29.3	27.399	246	1.1276	7	1.0919	7
F8WDD7;P59998;F8WCF6;P59998-2;A0A0A6YYG9;P59998-3;H7C0A3;F8WDW3;F8WE39;R4GN08;P59998-4	4;4;4;4;4;3;2;1;1;1;1	Actin-related protein 2/3 complex subunit 4	ARPC4;ARPC4-TTLL3	37.2	13.057	113	1.1275	6	1.2425	6
P63261;I3L3I0;I3L1U9;I3L4N8;K7EM38;I3L3R2;J3KT65	21;13;13;11;10;10;10	Actin, cytoplasmic 2;Actin, cytoplasmic 2, N-terminally processed	ACTG1	64.8	41.792	375	1.1272	105	1.0366	105
P49721;A0A087WVV1	3;2	Proteasome subunit beta type-2	PSMB2	16.9	22.836	201	1.1271	4	1.0615	4
P05026-2;P05026;V9GYR2	2;2;1	Sodium/potassium-transporting ATPase subunit beta-1	ATP1B1	7.3	34.893	301	1.1269	2	1.1458	2
P08727;CON__P08727;C9JM50;CON__P19001;K7EMS3;P19012;CON__P19012;K7EPJ9;P19012-2;A8MT21;CON__Q61782;C9JTG5;Q8N1A0-2;Q8N1A0;CON__Q8N1A0;P35900;CON__P35900;CON__Q9D312;Q99456;CON__Q99456	16;16;8;6;4;4;4;3;2;2;1;1;1;1;1;1;1;1;1;1	Keratin, type I cytoskeletal 19	KRT19	38.2	44.105	400	1.1268	22	0.94748	22
Q9UKD2	7	mRNA turnover protein 4 homolog	MRTO4	28.5	27.56	239	1.1264	6	1.0356	6
Q15008;Q15008-4;Q15008-3;Q15008-2;H7C531;C9J7B7	3;3;2;2;1;1	26S proteasome non-ATPase regulatory subunit 6	PSMD6	8.5	45.531	389	1.1264	4	1.0302	4
P82932	4	28S ribosomal protein S6, mitochondrial	MRPS6	32.8	14.226	125	1.1253	6	0.90116	6
P07384;E9PIA9;E9PLX0;E9PJJ3;E9PLC9;E9PMC6;E9PJA6;E9PSA6;E9PL37;E9PQB3;E9PRM1	4;1;1;1;1;1;1;1;1;1;1	Calpain-1 catalytic subunit	CAPN1	5.3	81.889	714	1.125	3	1.1961	3
O95163;F5H2T0;H0YDF3	10;9;1	Elongator complex protein 1	IKBKAP	8.3	150.25	1332	1.1242	10	1.0383	10
Q9NY12-2;Q9NY12	1;1	H/ACA ribonucleoprotein complex subunit 1	GAR1	4.5	20.834	199	1.124	2	0.91618	2
Q15046;Q15046-2;H3BVA8;J3KRL2;H3BPV7;H3BRC9	23;22;7;4;3;1	Lysine--tRNA ligase	KARS	39.7	68.047	597	1.1229	32	0.99524	32
Q9NXH9-2;Q9NXH9;K7EQQ8;K7EQU7;K7EQY6;K7EMZ2;K7ENI9;K7ERR5;K7EJX9	9;9;7;2;1;1;1;1;1	tRNA (guanine(26)-N(2))-dimethyltransferase	TRMT1	17.3	69.305	630	1.1226	9	1.0328	9
D6RA57;Q96EY4;H0Y9X1;D6RE67;D6RC31	4;4;4;2;2	Translation machinery-associated protein 16	TMA16	38.2	17.155	144	1.1225	4	1.2313	4
P00918	3	Carbonic anhydrase 2	CA2	13.5	29.246	260	1.1223	3	0.99478	3
Q16629-3;Q16629-2;A0A0B4J1Z1;Q16629-4;C9JAB2;Q16629;F8WEA1	4;4;4;4;4;4;1	Serine/arginine-rich splicing factor 7	SRSF7	33.3	15.257	132	1.1222	7	1.0969	7
P61019-2;P61019;H7C125;E9PKL7;Q6PIK3;Q8WUD1-2;Q5HYI5;Q8WUD1	3;3;2;2;1;1;1;1	Ras-related protein Rab-2A	RAB2A	21.8	20.847	188	1.1221	5	0.96027	5
H7C0Q6;Q9C037-3;Q9C037-2;Q9C037	1;1;1;1	Tripartite motif-containing protein 4	TRIM4	5.4	23.413	202	1.1211	3	1.0795	3
Q96HR8-2;Q96HR8;D6RIB3	3;3;1	H/ACA ribonucleoprotein complex non-core subunit NAF1	NAF1	10.5	41.894	389	1.1204	5	0.94538	5
P67936;P67936-2;K7ENT6;K7EMU5;K7EPB9;K7ERG3;K7EPV9;U3KQK2	16;11;7;6;6;5;4;4	Tropomyosin alpha-4 chain	TPM4	48.4	28.521	248	1.1202	15	1.2	16
P63208;E5RJR5;E7ERH2;F8W8N3;P63208-2;E5RGM3	7;7;4;4;4;3	S-phase kinase-associated protein 1	SKP1	40.5	18.658	163	1.1186	9	1.0593	9
H0YNX5;H0YNA5;P67812-2;H0YNG3;P67812-4;P67812;P67812-3	2;2;2;2;2;2;2	Signal peptidase complex catalytic subunit SEC11A	SEC11A	16	11.986	106	1.1181	2	1.131	2
P09651-3;F8W6I7;P09651-2;P09651;F8VZ49;Q32P51;F8VTQ5;F8W646;H0YH80;F8VYN5	17;17;17;17;12;11;10;9;7;5	Heterogeneous nuclear ribonucleoprotein A1;Heterogeneous nuclear ribonucleoprotein A1-like 2	HNRNPA1;HNRNPA1L2	60.7	29.386	267	1.118	54	1.1671	54
P23284	3	Peptidyl-prolyl cis-trans isomerase B	PPIB	14.8	23.742	216	1.1169	6	1.1739	6
O95347-2;O95347;Q5T821;A0A0C4DGE5	8;8;2;1	Structural maintenance of chromosomes protein 2	SMC2	7.7	124.92	1099	1.1159	8	1.044	8
P43363;C9J9A2;C9J958;O60732-2;Q3SYA6;P43355;P43358;P43361;A2A368;A8MXT2;Q96M61;Q8TD91-2;O15480;A0A0A0MSA3;O60732	2;1;1;1;1;1;1;1;1;1;1;1;1;1;1	Melanoma-associated antigen 10;Melanoma-associated antigen C1;Melanoma-associated antigen 1;Melanoma-associated antigen 4;Melanoma-associated antigen 8;Melanoma-associated antigen B16;Melanoma-associated antigen B17;Melanoma-associated antigen B18;Melanoma-associated antigen B3	MAGEA10;MAGEC1;MAGEC3;MAGEA1;MAGEA4;MAGEA8;MAGEB16;MAGEB17;MAGEB18;MAGEB3	5.1	40.78	369	1.1159	3	0.99081	3
Q9Y224;G3V4C6;H0YJB9;G3V4E7	5;3;2;1	UPF0568 protein C14orf166	C14orf166	23.8	28.068	244	1.1152	9	1.017	9
F8VRU3;O43716;H0YIV9	1;1;1	Glutamyl-tRNA(Gln) amidotransferase subunit C, mitochondrial	GATC	7.4	13.08	121	1.1151	2	1.0663	2
C9J0J7;P35080-2;G5E9Q6;C9JQ45;C9J2N0	5;5;5;4;3	Profilin-2;Profilin	PFN2	56	9.8402	91	1.115	8	1.1401	8
A0A087WUD3;Q9NRP0;Q9NRP0-2	1;1;1	Oligosaccharyltransferase complex subunit OSTC	OSTC	14.5	9.369	83	1.1147	2	1.178	2
Q9Y5L0-5;Q9Y5L0-3;Q9Y5L0;Q9Y5L0-1;C9J7E5;E9PFH4	2;2;2;2;2;1	Transportin-3	TNPO3	3.1	97.371	859	1.1142	2	1.0905	2
O94826	4	Mitochondrial import receptor subunit TOM70	TOMM70A	6.6	67.454	608	1.1138	3	1.0569	3
Q9BQA1-2;Q9BQA1;H0Y711	3;3;1	Methylosome protein 50	WDR77	11.5	29.651	278	1.1131	3	0.98758	3
P07814;V9GYZ6;V9GZ76	50;30;2	Bifunctional glutamate/proline--tRNA ligase;Glutamate--tRNA ligase;Proline--tRNA ligase	EPRS	37.2	170.59	1512	1.113	96	1.0458	95
Q09161;X6R941	12;3	Nuclear cap-binding protein subunit 1	NCBP1	17.7	91.838	790	1.1127	18	0.98285	18
P49773;D6REP8;D6RE99;D6RD60;D6RC06	3;2;2;2;1	Histidine triad nucleotide-binding protein 1	HINT1	30.2	13.802	126	1.1121	7	1.0683	7
P26368-2;P26368;K7ENG2	8;8;7	Splicing factor U2AF 65 kDa subunit	U2AF2	22.5	53.12	471	1.1115	16	0.99136	16
Q04637-6;Q04637-7;Q04637-5;E7EX73;Q04637-4;E9PGM1;Q04637-3;E7EUU4;Q04637;Q04637-8;Q04637-9;A0A0A0MR52;C9J6B6;C9K073;C9JF13;C9J2Z7;H7C0V6;H7C044	14;14;14;14;14;14;14;14;14;14;14;10;9;9;9;8;2;2	Eukaryotic translation initiation factor 4 gamma 1	EIF4G1	13.8	154.8	1403	1.1107	27	1.0908	27
P11388;P11388-2;P11388-3;P11388-4	5;5;5;5	DNA topoisomerase 2-alpha	TOP2A	3.7	174.38	1531	1.1101	4	1.1962	4
Q1KMD3;H3BQZ7	10;8	Heterogeneous nuclear ribonucleoprotein U-like protein 2	HNRNPUL2;hCG_2044799	14.9	85.104	747	1.11	10	0.91221	10
J3KN67;P06753;P06753-7	12;9;6	Tropomyosin alpha-3 chain	TPM3	31.6	33.222	285	1.1094	3	1.0334	3
Q14247-3;Q14247;Q14247-2	7;7;6	Src substrate cortactin	CTTN	16.4	57.466	513	1.1093	9	1.1379	9
O14744;O14744-5;O14744-2;G3V580;H0YJX6;O14744-3;G3V5L5;G3V2X6;G3V2L6;C9JSX3;O14744-4;G3V507;G3V2F5;G3V5T6;H0YJ77	6;5;5;4;4;4;3;3;2;2;2;1;1;1;1	Protein arginine N-methyltransferase 5;Protein arginine N-methyltransferase 5, N-terminally processed	PRMT5	12.4	72.683	637	1.1088	5	0.99833	5
E9PE17;Q9Y2R5;I3L0E3	2;2;2	28S ribosomal protein S17, mitochondrial	MRPS17	14	14.374	129	1.1075	2	0.79629	2
Q96A72;F5H6P7;P61326;F5H6N1;P61326-2;F5H3U9;F5H124	4;3;3;2;2;1;1	Protein mago nashi homolog 2;Protein mago nashi homolog	MAGOHB;MAGOH	26.4	17.276	148	1.107	6	1.1419	6
M0R050;Q9NQT4	2;2	Exosome complex component RRP46	EXOSC5	18.3	21.256	197	1.1066	3	1.2071	3
P62158;H0Y7A7;E7ETZ0;E7EMB3;G3V361;Q96HY3;G3V226;F8WBR5;M0QZ52;G3V479;P27482	8;8;7;7;5;5;4;3;3;3;1	Calmodulin	CALM1;CALM2	41.6	16.837	149	1.1056	12	1.136	12
Q562R1	6	Beta-actin-like protein 2	ACTBL2	18.1	42.003	376	1.1049	4	0.95562	4
Q92900-2;Q92900	2;2	Regulator of nonsense transcripts 1	UPF1	1.9	123.03	1118	1.1047	2	1.1649	2
Q8NFW8;F5H296;Q8NFW8-2	2;1;1	N-acylneuraminate cytidylyltransferase	CMAS	7.1	48.379	434	1.1044	2	1.0494	2
Q9BWJ5	4	Splicing factor 3B subunit 5	SF3B5	55.8	10.135	86	1.1043	7	0.97822	7
P62995-3;P62995;H7BXF3;H7C2L4	3;3;2;1	Transformer-2 protein homolog beta	TRA2B	19.7	21.935	188	1.1031	5	1.0769	5
P05556;P05556-2;P05556-5;P05556-4;P05556-3;E7ERX5;Q5T3E6;E9PLR6;E7EUI6;E7EQW5	4;2;2;2;2;1;1;1;1;1	Integrin beta-1	ITGB1	5.9	88.414	798	1.103	4	1.0599	4
P41252;A0A0A0MSX9;J3KR24;Q5TCD1;Q5TCC6	35;34;33;8;3	Isoleucine--tRNA ligase, cytoplasmic	IARS	30.9	144.5	1262	1.1029	53	1.056	53
Q93008-1;Q93008;O00507-2	32;32;15	Probable ubiquitin carboxyl-terminal hydrolase FAF-X	USP9X	13.7	290.46	2554	1.1029	33	1.026	33
P40616-2;P40616;F8VYN9;F8VP99;F8VP63;B4DZG7	2;2;2;1;1;1	ADP-ribosylation factor-like protein 1	ARL1	12.2	18.565	164	1.1023	2	1.2766	2
P43487-2;P43487;F6WQW2;C9JXG8;C9JJ34;C9JDM3;C9JGV6	2;2;2;1;1;1;1	Ran-specific GTPase-activating protein	RANBP1	10	23.239	200	1.1023	2	1.1307	2
H3BPC4;H3BQQ9;P63279;B0QYN7	3;3;3;3	SUMO-conjugating enzyme UBC9	UBE2I	34.3	7.8891	70	1.1021	4	1.144	4
P07954-2;P07954	4;4	Fumarate hydratase, mitochondrial	FH	10.9	50.212	467	1.1016	4	1.1775	4
Q9BV44;H7C3J3;H7C0R6	6;5;3	THUMP domain-containing protein 3	THUMPD3	13.2	57.002	507	1.1008	7	1.0655	7
P48047;H7C0C1;H7C086;H7C068	6;4;2;1	ATP synthase subunit O, mitochondrial	ATP5O	35.2	23.277	213	1.1001	10	1.0887	10
Q9BQ48;M0R226	1;1	39S ribosomal protein L34, mitochondrial;Ribosomal protein L34	MRPL34	10.9	10.165	92	1.0997	2	0.84488	2
P51149;C9J592;C9J8S3;C9J4S4;C9IZZ0;C9J4V0;C9J7D1	6;5;4;3;3;3;2	Ras-related protein Rab-7a	RAB7A	35.7	23.489	207	1.0995	9	1.0894	9
J3QKR0;C9JLV5;Q9UNS2;J3QL22;J3QS85;J3KTQ1;K7ES36;H7C3P9;Q9UNS2-2	2;2;2;1;1;1;1;1;1	COP9 signalosome complex subunit 3	COPS3	27.6	12.783	116	1.0994	3	1.2329	3
Q9Y294;K7ES22;Q9NVP2	2;1;1	Histone chaperone ASF1A;Histone chaperone ASF1B	ASF1A;ASF1B	11.3	22.968	204	1.0986	2	1.051	2
Q99714;Q99714-2;Q5H928	13;11;9	3-hydroxyacyl-CoA dehydrogenase type-2	HSD17B10	68.2	26.923	261	1.0981	17	0.97851	17
H7C330;P13861-2;P13861;P31323	2;2;2;1	cAMP-dependent protein kinase type II-alpha regulatory subunit;cAMP-dependent protein kinase type II-beta regulatory subunit	PRKAR2A;PRKAR2B	28.3	10.021	92	1.098	2	1.1441	2
A6NJU6;Q9UKK9;A6NFX8;H0YEY4;A6NCQ0	3;3;3;2;2	ADP-sugar pyrophosphatase	NUDT5	19.4	20.629	186	1.0974	3	0.96073	3
Q9UNZ5;K7ESE5;A0A0A0MQS3	2;1;1	Leydig cell tumor 10 kDa protein homolog	C19orf53	16.2	10.576	99	1.0971	2	1.1891	2
P54136;P54136-2;E5RJM9;E5RH09	32;29;5;4	Arginine--tRNA ligase, cytoplasmic	RARS	49.2	75.378	660	1.0965	33	1.0146	33
Q9Y3I0	3	tRNA-splicing ligase RtcB homolog	C22orf28	6.9	55.21	505	1.0964	5	1.1182	5
O60506;O60506-2;F6UXX1	28;27;10	Heterogeneous nuclear ribonucleoprotein Q	SYNCRIP	47.8	69.602	623	1.0964	83	0.82884	83
Q08J23;Q08J23-2;Q08J23-3	18;17;12	tRNA (cytosine(34)-C(5))-methyltransferase	NSUN2	27.9	86.47	767	1.096	22	1.047	22
B2WTI3;B2WTI4;Q6NYC1-2;K7EJU9;Q6NYC1;Q6NYC1-3	3;3;3;3;3;3	Bifunctional arginine demethylase and lysyl-hydroxylase JMJD6	JMJD6	11	39.241	335	1.096	3	0.87518	3
B7WP74;Q9HCG8	6;6	Pre-mRNA-splicing factor CWC22 homolog	CWC22	8.7	85.576	745	1.0954	7	1.0452	7
Q3L8U1-2;Q3L8U1-3;Q3L8U1;H3BTW3;H0YJG4;Q9HCK8-2;Q9HCK8;C9JFU2;H7C294;Q8TD26-3;A0A087WU44;O14647-2;O14647	6;6;6;5;4;4;4;1;1;1;1;1;1	Chromodomain-helicase-DNA-binding protein 9;Chromodomain-helicase-DNA-binding protein 8	CHD9;CHD8	1.8	324.05	2881	1.0952	3	1.128	3
C9JQD4;O43447;H0YEL5;O43447-2;A6NM32	4;4;3;3;1	Peptidyl-prolyl cis-trans isomerase;Peptidyl-prolyl cis-trans isomerase H	PPIH	29.2	15.8	144	1.0949	4	1.0152	4
H0YJ63;G3V438;H0YJG7;O95433-2;O95433	1;1;1;1;1	Activator of 90 kDa heat shock protein ATPase homolog 1	AHSA1	24.4	10.031	90	1.0939	2	1.146	2
P98179	3	Putative RNA-binding protein 3	RBM3	27.4	17.17	157	1.0928	9	1.1773	9
P46977-2;P46977	1;1	Dolichyl-diphosphooligosaccharide--protein glycosyltransferase subunit STT3A	STT3A	1.8	69.588	613	1.0909	2	1.0236	2
O75976-2;O75976;J3QRJ9;J3QQJ4	4;4;1;1	Carboxypeptidase D	CPD	3.7	126.49	1133	1.0905	4	1.0769	4
Q92905;E5RHH5	2;1	COP9 signalosome complex subunit 5	COPS5	4.8	37.578	334	1.0901	3	1.3323	3
O14818;O14818-2;H0Y586;Q8TAA3-2;Q8TAA3-5;Q8TAA3;O14818-4;A0A087WYS6;F5GY34	8;6;5;4;4;4;3;3;1	Proteasome subunit alpha type-7;Proteasome subunit alpha type-7-like	PSMA7;PSMA8	43.5	27.887	248	1.09	8	0.98152	8
Q9NQ94-3;Q9NQ94-2;Q9NQ94-4;Q9NQ94;F8W9F8;Q9NQ94-5;Q9NQ94-6;Q5T0W7;D6RBS9;D6R9D6;Q8TBY0-2;Q8TBY0-3;A0AV96-2;Q8TBY0;B7Z8Z7;A0AV96	4;4;4;4;4;3;3;2;1;1;1;1;1;1;1;1	APOBEC1 complementation factor	A1CF	8.4	62.681	569	1.09	6	0.89056	6
P14868;P14868-2;C9J7S3;C9JLC1;H7BZ35;C9JQM9;H7C278	21;19;9;9;8;5;4	Aspartate--tRNA ligase, cytoplasmic	DARS	47.7	57.136	501	1.0899	40	1.0224	40
P53396-2;P53396;P53396-3;K7ESG8;K7EIE7	12;12;8;3;2	ATP-citrate synthase	ACLY	11.5	119.77	1091	1.0897	22	1.0791	22
O43242;O43242-2	6;4	26S proteasome non-ATPase regulatory subunit 3	PSMD3	12.4	60.977	534	1.0893	9	1.0563	9
P48163;P48163-2	13;9	NADP-dependent malic enzyme	ME1	26.4	64.149	572	1.0878	16	1.1247	16
P63000;P63000-2;P60763;P15153;J3KSC4;J3QLK0;B1AH77;B1AH78;B1AH80	6;6;4;3;2;2;2;2;2	Ras-related C3 botulinum toxin substrate 1;Ras-related C3 botulinum toxin substrate 3;Ras-related C3 botulinum toxin substrate 2	RAC1;RAC3;RAC2	34.4	21.45	192	1.0875	7	1.073	7
P82933	1	28S ribosomal protein S9, mitochondrial	MRPS9	3.3	45.834	396	1.0875	2	0.89788	2
Q9NVI7-3;H0Y2W2;Q9NVI7-2;Q9NVI7;Q5T9A4;Q5T9A4-3;Q5T2N8;Q5SV16;Q5T9A4-2	7;7;7;6;6;5;4;3;2	ATPase family AAA domain-containing protein 3A;ATPase family AAA domain-containing protein 3B;ATPase family AAA domain-containing protein 3C	ATAD3A;ATAD3B;ATAD3C	12.8	57.947	507	1.0872	5	1.4902	5
R4GNH3;P17980;E9PN50;E9PMD8;E9PKD5;E9PM69;E9PLG2	11;10;9;9;9;9;4	26S protease regulatory subunit 6A	PSMC3	30.7	47.352	423	1.0867	11	1.0613	11
P33176;A0A0G2JMZ6;J3KNA1;O60282;Q12840;O60282-2;C9JWB9	13;4;4;4;4;3;1	Kinesin-1 heavy chain	KIF5B	16	109.68	963	1.0865	23	1.1205	23
P62875	2	DNA-directed RNA polymerases I, II, and III subunit RPABC5	POLR2L	29.9	7.645	67	1.0865	2	1.0416	2
P15531;P15531-2	9;9	Nucleoside diphosphate kinase A	NME1	53.3	17.149	152	1.0858	4	1.1632	3
P36542-2;P36542	4;4	ATP synthase subunit gamma, mitochondrial	ATP5C1	15.5	32.881	297	1.0858	4	1.1138	4
P13693;Q5W0H4;A0A0B4J2C3;P13693-2;Q56UQ5;J3KPG2;E9PJF7	2;2;2;1;1;1;1	Translationally-controlled tumor protein;TPT1-like protein	TPT1	15.7	19.595	172	1.0856	2	1.1243	2
P07900;P07900-2;G3V2J8;Q58FG0;Q14568	38;38;11;6;5	Heat shock protein HSP 90-alpha	HSP90AA1	40.7	84.659	732	1.0855	57	1.1013	57
Q13162;H7C3T4;A6NJJ0;A6NG45	12;8;4;4	Peroxiredoxin-4	PRDX4	55	30.54	271	1.0846	15	1.0954	15
P26641;P26641-2	17;17	Elongation factor 1-gamma	EEF1G	33.6	50.118	437	1.0846	34	1.0055	34
P43686;P43686-2	10;9	26S protease regulatory subunit 6B	PSMC4	23.9	47.366	418	1.0846	12	0.99927	12
O14737;O14737-2;K7EQA1;K7ESJ4;Q3HM38;X6R2P6	6;5;4;3;2;2	Programmed cell death protein 5	PDCD5	55.2	14.285	125	1.0844	12	1.1523	12
A0A0C4DFS8;P43490	3;3	Nicotinamide phosphoribosyltransferase	NAMPT	7.9	41.864	368	1.0841	3	1.0063	3
P19105;O14950;J3QRS3;P24844;J3KTJ1;P24844-2	4;4;4;2;1;1	Myosin regulatory light chain 12A;Myosin regulatory light chain 12B;Myosin regulatory light polypeptide 9	MYL12A;MYL12B;MYL9	24	19.794	171	1.0836	4	1.1414	4
Q9Y333	5	U6 snRNA-associated Sm-like protein LSm2	LSM2	67.4	10.834	95	1.0836	5	1.0242	5
P05455;E7ERC4;E9PGX9;E9PFL9	29;17;13;10	Lupus La protein	SSB	52.2	46.836	408	1.0836	84	0.85045	84
P78527;P78527-2;F5GX40	68;67;2	DNA-dependent protein kinase catalytic subunit	PRKDC	17.6	469.08	4128	1.0825	99	1.244	99
O15372;B3KS98;A0A087WZK9;E5RJT0;E5RFW7;E5RFH0;E5RHC7;E5RH59;E5RGU4	10;10;9;4;3;3;2;2;2	Eukaryotic translation initiation factor 3 subunit H	EIF3H;EIF3S3	28.4	39.93	352	1.0823	18	1.0828	18
P20674;H3BNX8;H3BRM5;H3BV69	3;3;2;2	Cytochrome c oxidase subunit 5A, mitochondrial	COX5A	16.7	16.762	150	1.0819	5	1.1985	5
Q9Y3B4	2	Pre-mRNA branch site protein p14	SF3B14	22.4	14.585	125	1.0815	3	1.0434	3
Q13347;Q5TFK1	9;2	Eukaryotic translation initiation factor 3 subunit I	EIF3I	37.8	36.501	325	1.0809	12	1.0191	12
P12236;P12235;V9GYG0	9;6;5	ADP/ATP translocase 3;ADP/ATP translocase 1	SLC25A6;SLC25A4	29.2	32.866	298	1.0803	3	1.1006	3
Q14974;Q14974-2;J3KTM9;J3QR48;J3QKQ5;J3QRG4	15;11;10;4;2;1	Importin subunit beta-1	KPNB1	21.3	97.169	876	1.0794	13	1.0794	13
P30153;B3KQV6;E9PH38;H0YDG7;C9J9C1;P30154-5;P30154-4;P30154;P30154-3;P30154-2	7;6;2;2;2;2;2;2;2;2	Serine/threonine-protein phosphatase 2A 65 kDa regulatory subunit A alpha isoform	PPP2R1A	17.3	65.308	589	1.0794	12	1.0728	12
Q8TEQ6	9	Gem-associated protein 5	GEMIN5	6.3	168.59	1508	1.0792	9	1.0633	9
P63272;D3DTZ5;J3QSB9;J3KSQ6;J3QR04	4;3;3;1;1	Transcription elongation factor SPT4	SUPT4H1	27.4	13.193	117	1.0787	7	1.0399	7
Q92896;Q92896-3;Q92896-2;H3BM42	8;8;8;5	Golgi apparatus protein 1	GLG1	7.2	134.55	1179	1.0786	8	1.1123	8
Q13885;Q9BVA1;A0A075B736;Q5SQY0;I3L2F9;A6NNZ2;Q9H4B7;CON__ENSEMBL:ENSBTAP00000025008	17;16;6;6;6;6;3;3	Tubulin beta-2A chain;Tubulin beta-2B chain	TUBB2A;TUBB2B	51.2	49.906	445	1.0775	7	1.0964	7
P61586;Q5JR07;C9JNR4;C9JX21;Q5JR05;Q5JR06;E9PN11;U3KQA9;U3KQV3;E9PLA2;C9JRM1;P62745	6;5;5;5;5;4;4;4;4;3;3;2	Transforming protein RhoA	RHOA;RHOC	33.2	21.768	193	1.0773	2	0.76707	2
E9PN17;O75964	5;5	ATP synthase subunit g, mitochondrial	ATP5L	63.2	8.4518	76	1.0771	5	1.0648	5
P13639;M0R0I6	32;1	Elongation factor 2	EEF2	36.6	95.337	858	1.0762	60	1.1226	60
Q04917;A2IDB2;F8WEB6;A2IDB1	9;5;1;1	14-3-3 protein eta	YWHAH	43.5	28.218	246	1.0761	7	1.0791	7
P00338;P00338-3;P00338-5;P00338-4;P00338-2;F5GXY2;F5GYU2;F5GXH2;F5H5J4;F5H6W8;F5GZQ4;F5H8H6;F5GXC7;F5GWW2;F5GXU1;F5H5G7;F5H155;A0A087WUM2;G3XAP5;F5H245;Q6ZMR3;P07864	18;17;14;14;14;11;10;9;7;7;5;3;3;3;3;1;1;1;1;1;1;1	L-lactate dehydrogenase A chain	LDHA	46.7	36.688	332	1.0754	35	1.0777	35
P53618;E9PP73;E9PP63;E9PKQ1	16;13;4;4	Coatomer subunit beta	COPB1	20.5	107.14	953	1.0751	19	1.1141	19
Q2NL82;I3L1Q5;I3L4E8	11;4;1	Pre-rRNA-processing protein TSR1 homolog	TSR1	16.4	91.809	804	1.0743	13	0.85395	13
Q15056-2;Q15056	3;3	Eukaryotic translation initiation factor 4H	EIF4H	18.9	25.2	228	1.074	4	1.1366	4
P68036-2;P68036;P68036-3;A0A0B4J2G9	4;4;4;3	Ubiquitin-conjugating enzyme E2 L3	UBE2L3	45.1	14.121	122	1.0738	7	0.87494	7
Q9NRW1;P20340-2;P20340;C9JB90;F5H3K7;C9J0I2;C9JU14;F5GX61;P20340-3;J3KR73;P20340-4;Q9NRW1-2;Q14964	2;2;2;1;1;1;1;1;1;1;1;1;1	Ras-related protein Rab-6B;Ras-related protein Rab-6A;Ras-related protein Rab-39A	RAB6B;RAB6A;RAB39A	10.6	23.461	208	1.0737	3	0.98019	3
O00231;O00231-2;J3QRY4;J3KSW3	9;9;6;1	26S proteasome non-ATPase regulatory subunit 11	PSMD11	23.7	47.463	422	1.0735	12	1.0622	12
Q14315;Q14315-2	93;91	Filamin-C	FLNC	42.8	291.02	2725	1.0732	102	1.1472	102
P35754	2	Glutaredoxin-1	GLRX	22.6	11.776	106	1.073	2	1.0618	2
P62304	2	Small nuclear ribonucleoprotein E	SNRPE	25	10.803	92	1.0727	4	0.98514	4
O75947;O75947-2;F5H608	7;6;4	ATP synthase subunit d, mitochondrial	ATP5H	42.2	18.491	161	1.0726	9	1.0795	9
A0A087WVZ9;P19388;A0A087WWX0;A0A0A0MQR7	3;3;2;2	DNA-directed RNA polymerases I, II, and III subunit RPABC1	POLR2E	19.6	21.459	184	1.0726	4	1.0073	4
P52895;B4DK69;A0A0A0MSD5;S4R3P0;P52895-2	15;14;14;6;2	Aldo-keto reductase family 1 member C2	AKR1C2	56.3	36.735	323	1.0719	4	1.1333	4
Q9Y3A6	1	Transmembrane emp24 domain-containing protein 5	TMED5	5.2	26.005	229	1.0715	2	0.9892	2
Q7Z2W4-3;Q7Z2W4-2;Q7Z2W4;C9J6P4	5;5;5;5	Zinc finger CCCH-type antiviral protein 1	ZC3HAV1	9.6	67.589	624	1.0713	8	0.81417	8
H0YLC2;H0YMA1;H0YMZ1;H0YL69;P25789;H0YKT8;H0YMI6;H0YN18;H0YMV3;H0YKS0;P25789-2;H0YLS6	5;5;5;5;5;4;4;4;3;3;3;2	Proteasome subunit alpha type;Proteasome subunit alpha type-4;Proteasome subunit beta type	PSMA4	36.8	19.654	174	1.0706	3	1.1408	3
P15559-2;P15559;B4DLR8;P15559-3;H3BRK3;H3BNV2	11;11;10;10;9;8	NAD(P)H dehydrogenase [quinone] 1	NQO1	44.6	27.295	240	1.0704	19	1.0862	19
O60841;A0A087WUT6	35;35	Eukaryotic translation initiation factor 5B	EIF5B	31.1	138.83	1220	1.0704	53	1.0057	53
P62633-2;P62633;P62633-7;P62633-3;P62633-8;P62633-5;P62633-4;P62633-6	5;5;4;4;4;4;4;4	Cellular nucleic acid-binding protein	CNBP	36.5	18.742	170	1.0701	13	1.1736	13
P52597	5	Heterogeneous nuclear ribonucleoprotein F;Heterogeneous nuclear ribonucleoprotein F, N-terminally processed	HNRNPF	18.3	45.671	415	1.07	7	1.0381	7
X6RJP6;P37802;P37802-2	7;7;7	Transgelin-2	TAGLN2	42.2	21.086	187	1.07	9	1.0378	9
Q9Y450-4;Q9Y450;B7Z524;H0YDX7;J3QT46;H0YES5;E9PJ90;E9PN23;G5E991;E9PMN1;E9PLR4;E9PHZ9;Q9Y450-2	7;7;6;6;6;5;1;1;1;1;1;1;1	HBS1-like protein	HBS1L	15	70.624	642	1.0699	7	0.97399	7
Q9Y6G9;E9PHI6;C9JGM7;C9JLW1;B4E2E0;O43237	8;4;3;3;1;1	Cytoplasmic dynein 1 light intermediate chain 1	DYNC1LI1	19.9	56.578	523	1.0698	9	0.98952	9
P62491-2;H3BMH2;Q15907-2;H3BSC1;P62491;Q15907;B4DQU5	7;7;7;7;7;7;3	Ras-related protein Rab-11A;Ras-related protein Rab-11B	RAB11A;RAB11B	42.6	17.659	155	1.0692	12	1.0824	12
Q53GQ0;Q53GQ0-2;E9PI21	3;1;1	Estradiol 17-beta-dehydrogenase 12	HSD17B12	12.8	34.324	312	1.0688	3	1.1829	3
Q5T4S7-3;Q5T4S7-4;Q5T4S7;Q5T4S7-2;Q5T4S7-5;A0A0A0MSW0;X6R960;X6RE05;Q5T4S7-6;Q5TBN9	51;51;51;51;29;16;6;5;1;1	E3 ubiquitin-protein ligase UBR4	UBR4	11	571.85	5159	1.0687	46	1.0232	46
Q99460-2;Q99460;A0A087WW66;H7C378;H7BZR6;C9J9M4	11;11;11;4;1;1	26S proteasome non-ATPase regulatory subunit 1	PSMD1	12.7	102.26	922	1.0687	13	0.98885	13
Q14498-3;Q14498-2;Q14498;H0Y4X3;G3XAC6;Q5QP23;A0A087X122;Q5QP22	8;8;8;7;5;2;1;1	RNA-binding protein 39	RBM39	19.5	57.089	508	1.068	16	1.0371	15
Q7L2H7;J3KNJ2;Q7L2H7-2;H0YCQ8;E9PN86;E9PRY0;E9PRI2;E7ESM3	11;8;7;6;4;3;1;1	Eukaryotic translation initiation factor 3 subunit M	EIF3M	35	42.502	374	1.0677	14	1.0361	14
C9J9W2;Q14847;Q14847-2;Q14847-3	3;3;3;2	LIM and SH3 domain protein 1	LASP1	19.3	18.98	166	1.0673	4	1.1969	4
Q08945;E9PPZ7;E9PMD4	11;3;3	FACT complex subunit SSRP1	SSRP1	17.5	81.074	709	1.0669	18	1.1644	18
F6RFD5;P60981;P60981-2	7;7;6	Destrin	DSTN	44.4	15.397	135	1.0669	8	1.0936	8
P62312	6	U6 snRNA-associated Sm-like protein LSm6	LSM6	56.2	9.1275	80	1.0669	7	1.0301	7
Q9UHD8-3;Q9UHD8-7;Q9UHD8-2;Q9UHD8-5;Q9UHD8;K7ERG1;K7EJ51;K7EK18;K7EL40;Q9UHD8-4;Q9UHD8-9;Q9UHD8-8	2;2;2;2;2;1;1;1;1;1;1;1	Septin-9	2016-09-09	5.9	47.501	422	1.0668	3	1.0285	3
P11216;P11217;H0Y4Z6	11;4;2	Glycogen phosphorylase, brain form	PYGB	12.7	96.695	843	1.0668	8	0.95317	8
Q7RTV0	4	PHD finger-like domain-containing protein 5A	PHF5A	41.8	12.405	110	1.0659	7	0.92482	7
O95816;O95816-2	3;2	BAG family molecular chaperone regulator 2	BAG2	13.7	23.772	211	1.0656	3	1.052	3
P60709;G5E9R0;E7EVS6;C9JZR7;C9JTX5;A5A3E0	21;10;10;9;8;7	Actin, cytoplasmic 1;Actin, cytoplasmic 1, N-terminally processed	ACTB	64.8	41.736	375	1.0653	4	1.1056	4
Q13509;A0A0B4J269;Q13509-2;G3V2A3;G3V5W4;G3V2R8;G3V3R4;G3V2N6	14;14;12;3;2;2;2;2	Tubulin beta-3 chain	TUBB3	39.3	50.432	450	1.065	9	0.99936	9
A0A087WX59;Q16186;A0A087WUX6	2;2;1	Proteasomal ubiquitin receptor ADRM1	ADRM1	8.4	37.504	368	1.0646	2	1.0813	2
Q92598-2;Q92598-3;Q92598;Q92598-4;A0A0A0MSM0;R4GN69;Q5TBM3	17;17;17;16;13;3;1	Heat shock protein 105 kDa	HSPH1	25.2	92.115	814	1.0644	21	1.1404	21
P62826;B5MDF5;J3KQE5;F5H018;H0YFC6;B4DV51;A0A087X0W0	8;8;7;6;4;3;1	GTP-binding nuclear protein Ran	RAN	39.8	24.423	216	1.0643	11	1.1038	11
Q9UQ80;Q9UQ80-2;F8VR77;F8W0A3;H0YIN7;F8VZ69	20;16;11;7;6;2	Proliferation-associated protein 2G4	PA2G4	64	43.786	394	1.0641	30	1.1093	30
Q96AG4	3	Leucine-rich repeat-containing protein 59	LRRC59	11.4	34.93	307	1.064	3	1.0388	3
H3BT71;P38159;H0Y6E7;P38159-2;H3BR27;P38159-3;Q96E39;O75526;H3BNC1;Q8N7X1	6;6;5;5;4;4;3;3;2;1	RNA-binding motif protein, X chromosome;RNA-binding motif protein, X chromosome, N-terminally processed;RNA binding motif protein, X-linked-like-1;RNA-binding motif protein, X-linked-like-2	RBMX;RBMXL1;RBMXL2	21.6	32.197	296	1.0639	11	1.0509	11
O60783	3	28S ribosomal protein S14, mitochondrial	MRPS14	28.9	15.139	128	1.0636	4	0.90121	4
P40938-2;P40938;A0A087X270	2;2;1	Replication factor C subunit 3	RFC3	8.9	34.756	305	1.063	2	1.085	2
J3QLR8;Q9Y3D9	4;4	28S ribosomal protein S23, mitochondrial	MRPS23	27.6	17.517	152	1.063	5	0.89104	6
Q9UHV9	3	Prefoldin subunit 2	PFDN2	24	16.648	154	1.0628	3	1.1087	3
Q6P2E9;Q6P2E9-2	2;1	Enhancer of mRNA-decapping protein 4	EDC4	1.6	151.66	1401	1.0627	3	1.2511	3
Q99575	2	Ribonucleases P/MRP protein subunit POP1	POP1	2.5	114.71	1024	1.0627	3	0.88362	3
P50990-2;P50990;P50990-3;H7C4C8;H7C2U0	22;22;19;9;6	T-complex protein 1 subunit theta	CCT8	45.6	57.645	529	1.0626	43	1.0665	43
O60884;A0A087WT48	3;1	DnaJ homolog subfamily A member 2	DNAJA2	6.8	45.745	412	1.0624	4	1.0528	4
C9JRZ8;C9JRZ8-2;P15121	10;9;1	Aldo-keto reductase family 1 member B15	AKR1B15	37.7	36.537	316	1.0623	2	0.94788	2
Q96AE4;Q96AE4-2;E9PEB5	5;5;5	Far upstream element-binding protein 1	FUBP1	7.6	67.56	644	1.0619	3	1.1676	3
P55060-3;P55060;P55060-4;P55060-2	18;18;15;3	Exportin-2	CSE1L	23.2	107.78	945	1.0615	18	1.1113	18
Q9BQ67;M0QX71	4;3	Glutamate-rich WD repeat-containing protein 1	GRWD1	12.3	49.419	446	1.0607	4	0.81379	4
P40227;P40227-2;Q92526;Q92526-2;Q92526-3;J3KRI6	13;12;3;2;2;1	T-complex protein 1 subunit zeta	CCT6A	26.7	58.024	531	1.0606	22	1.101	22
P62877	2	E3 ubiquitin-protein ligase RBX1;E3 ubiquitin-protein ligase RBX1, N-terminally processed	RBX1	24.1	12.274	108	1.0606	4	1.037	4
A0A087WUZ8;P82930;C9JJ19	3;3;3	28S ribosomal protein S34, mitochondrial	MRPS34	13.1	20.662	176	1.0605	3	0.85771	3
O00629;H7C4F6	12;4	Importin subunit alpha-3	KPNA4	31.7	57.886	521	1.0601	23	0.96291	23
Q5T760;Q05519-2;Q05519;S4R3C4;B4DWT1	2;2;2;1;1	Serine/arginine-rich splicing factor 11	SRSF11	6.4	42.316	389	1.0599	4	0.81143	4
J3KNQ3;Q9UNM6;H0YD73;A0A087WUL9;Q9UNM6-2;E9PL38;E9PPD2;E9PQG3	7;7;6;6;6;5;1;1	26S proteasome non-ATPase regulatory subunit 13	PSMD13	24.6	39.829	349	1.0589	9	1.1311	9
P09234;A0A0A0MRR7;Q5TAL2	3;3;1	U1 small nuclear ribonucleoprotein C	SNRPC	24.5	17.394	159	1.0588	7	0.90889	7
Q9UL40-3;Q9UL40;D6RJ07;Q9UL40-2;B7Z6B6;B7Z6Q2;B7Z4J8;B7Z4N4	4;4;4;4;3;3;2;1	Zinc finger protein 346	ZNF346	18.7	29.267	262	1.0587	4	0.45456	4
O75369-2;O75369-9;O75369;O75369-8;O75369-6;O75369-3;E7EN95;O75369-7;O75369-5;O75369-4;A0A0A0MT44;H7C5L4;A0A0C4DGA1	108;108;108;108;105;105;97;97;91;91;6;4;2	Filamin-B	FLNB	50.6	275.66	2578	1.0583	142	1.0452	142
C9JPM4;P18085;C9JAK5;U3KQF2	5;5;4;2	ADP-ribosylation factor 4	ARF4	41.7	14.553	127	1.0579	5	1.0525	5
Q9P2E9;A0A0A0MRV0;Q9P2E9-2;Q9P2E9-3;A0A087WVV2;F8W7S5;A0A087WU26;A2A2S5;V9GY78;Q8N4C6-6;Q8N4C6-11;H0YDJ4;H9KV85;E9PN67;Q8N4C6-4;C9J066;Q8N4C6-9;Q8N4C6-2;Q8N4C6;Q8N4C6-5;Q8N4C6-10;Q8N4C6-7	46;46;45;43;41;37;18;5;2;1;1;1;1;1;1;1;1;1;1;1;1;1	Ribosome-binding protein 1	RRBP1	36.7	152.47	1410	1.0579	84	0.97296	84
P52701-4;A0A087WWJ1;P52701-2;P52701-3;P52701	2;2;2;2;2	DNA mismatch repair protein Msh6	MSH6	2.6	119.79	1058	1.0579	2	0.95327	2
Q92973-2;Q92973;E7EW37;Q92973-3;O14787-2;A0A075B780;O14787;K7ENW1;K7ESC1;S4R398	7;7;4;4;4;3;3;2;2;1	Transportin-1;Transportin-2	TNPO1;TNPO2	8.7	101.31	890	1.0572	6	1.1286	6
P62195-2;P62195;J3QLH6;J3KRP2;J3QSA9;J3QQM1;J3QRW1;J3QRR3;J3QSE0;Q8NB90-3;Q8NB90-2;Q8NB90	8;8;6;6;6;6;5;3;3;1;1;1	26S protease regulatory subunit 8	PSMC5	22.6	44.784	398	1.057	9	1.0642	9
P11279;P11279-2	4;3	Lysosome-associated membrane glycoprotein 1	LAMP1	8.4	44.882	417	1.0567	3	1.0281	3
O14979-3;O14979-2;A0A087WUK2;O14979	7;7;7;7	Heterogeneous nuclear ribonucleoprotein D-like	HNRPDL	25	27.191	244	1.0565	12	0.92464	12
C9J712;P35080	5;5	Profilin-2	PFN2	56	9.7982	91	1.0563	4	1.2768	4
D6RCD0;Q8NBQ5	2;2	Estradiol 17-beta-dehydrogenase 11	HSD17B11	12.9	28.102	256	1.0563	2	1.1473	2
Q86UP2-2;Q86UP2-4;Q86UP2;Q86UP2-3;G3V4Y7;B7Z6P3;G3V5P0;G3V5G2;H0YJP2;H0YJZ8;H0YJV5	24;24;24;23;14;7;4;4;3;3;1	Kinectin	KTN1	22.1	149.61	1300	1.0556	25	0.97411	25
P15374;A0A087WTB8;Q5TBK7	2;1;1	Ubiquitin carboxyl-terminal hydrolase isozyme L3	UCHL3	10.9	26.182	230	1.0553	2	1.1636	2
Q9UBM7;E9PJ54;E9PM00;E9PRL8;E9PQ71;E9PIP9;H0YE57	5;3;3;2;2;2;2	7-dehydrocholesterol reductase	DHCR7	13.5	54.489	475	1.0553	10	1.1484	10
Q13561;Q13561-3;Q13561-2;F8W1I6;H0YI98;H0YHL1;F8VW18;F8VX93;F8VRV7	7;7;7;5;4;2;2;1;1	Dynactin subunit 2	DCTN2	23.9	44.23	401	1.0553	6	1.0075	6
P17987;E7EQR6;F5H282;E7ERF2;F5GZ03;F5GZI8;F5H136;F5GYL4;F5H726;F5H676;F5H7Y1	23;16;15;15;8;5;5;3;3;3;2	T-complex protein 1 subunit alpha	TCP1	45.5	60.343	556	1.055	36	1.0806	36
P09012;M0R268;M0QXK2;M0R221;M0R2B8;M0R0G9;M0QZG7	7;6;5;5;5;4;4	U1 small nuclear ribonucleoprotein A	SNRPA	28.7	31.279	282	1.055	6	0.85393	6
Q9Y265;Q9Y265-2;E7ETR0;H7C4G5;J3QLR1;H7C4I3	10;9;7;4;2;2	RuvB-like 1	RUVBL1	29.8	50.227	456	1.0545	12	0.98231	12
E7ENZ3;P48643;P48643-2;B7ZAR1;E9PCA1;D6RIZ7;H0Y914	20;20;18;18;18;2;1	T-complex protein 1 subunit epsilon	CCT5	41.4	53.848	486	1.0543	35	1.0886	35
P22392-2;Q32Q12;J3KPD9;E7ERL0;P22392;E5RHP0;F6XY72;C9K028	10;10;9;8;8;5;4;3	Nucleoside diphosphate kinase B;Nucleoside diphosphate kinase	NME2;NME1-NME2;NME1	50.2	30.137	267	1.0537	25	1.1299	25
Q13200;Q13200-3;Q13200-2;H7C1H2;F8WBS8;H7C2Q3;C9JPC0	18;17;16;5;1;1;1	26S proteasome non-ATPase regulatory subunit 2	PSMD2	26	100.2	908	1.0534	25	1.0832	25
P62306;A0A0B4J254;F8W0W6	5;2;2	Small nuclear ribonucleoprotein F	SNRPF	48.8	9.7251	86	1.0528	9	0.94376	9
P62258;P62258-2;K7EM20;B4DJF2;I3L3T1;K7EIT4;I3L0W5	10;9;5;3;3;3;1	14-3-3 protein epsilon	YWHAE	40.8	29.174	255	1.0523	9	1.0447	9
Q99733;Q99733-2;E9PKT8;C9J6D1;C9JZI7;E9PNW0;E9PJJ2;E9PS34;E9PNJ7;A8MXH2;H0YCI4;E9PKI2;C9J1B1;E9PP22	5;5;4;4;4;3;3;3;3;3;2;1;1;1	Nucleosome assembly protein 1-like 4	NAP1L4	17.3	42.823	375	1.0522	6	1.0671	6
O00170;E9PMH2;V9GYQ3	4;3;1	AH receptor-interacting protein;Peptidyl-prolyl cis-trans isomerase	AIP	13.9	37.636	330	1.052	4	1.1349	4
Q9UDW1;Q9UDW1-2;Q9NZY4	2;1;1	Cytochrome b-c1 complex subunit 9	UQCR10	38.1	7.3084	63	1.052	2	1.0487	2
P00441;H7BYH4	2;1	Superoxide dismutase [Cu-Zn]	SOD1	16.9	15.936	154	1.0517	3	1.1167	3
Q12874	2	Splicing factor 3A subunit 3	SF3A3	5	58.848	501	1.0515	3	1.4601	3
O95197-3;O95197-4;O95197-7;O95197-2;O95197;O95197-5	2;2;2;2;2;1	Reticulon-3	RTN3	9.7	25.609	236	1.0513	3	1.0896	3
Q9NTJ3-2;E9PD53;Q9NTJ3;C9JR83;C9JVD8;C9J578;C9J9E4	12;12;12;2;1;1;1	Structural maintenance of chromosomes protein 4;Structural maintenance of chromosomes protein	SMC4	10.3	140.28	1230	1.0513	11	1.0719	11
P51398-2;P51398-3;P51398;V9GYA7;V9GZ61;V9GYC9;V9GYW1;V9GZ03;V9GYJ9;V9GYL9;V9GYF7;V9GY11	5;5;5;3;2;2;2;2;2;2;1;1	28S ribosomal protein S29, mitochondrial	DAP3	19.6	41.044	357	1.0512	7	0.75815	7
Q9NYL4-2;F8VU90;Q9NYL4;H0YHM7	2;2;2;1	Peptidyl-prolyl cis-trans isomerase FKBP11;Peptidyl-prolyl cis-trans isomerase	FKBP11	12.3	15.769	146	1.051	2	1.0064	2
Q8N7H5-3;Q8N7H5;Q8N7H5-2;B4DGJ5	8;8;7;5	RNA polymerase II-associated factor 1 homolog	PAF1	18.8	55.472	485	1.0501	13	0.91764	13
P56134-4;C9JJT5;P56134-3;P56134-2;P56134;C9JU26;G3V325	2;2;2;2;2;2;2	ATP synthase subunit f, mitochondrial	ATP5J2;PTCD1;ATP5J2-PTCD1	49	5.7407	49	1.0495	4	1.1051	4
Q9UHX1-4;A0A0J9YYL3;Q9UHX1-6;Q9UHX1-3;A0A0J9YXJ8;Q9UHX1-5;A0A0J9YVP6;Q9UHX1-2;A0A0J9YXX5;Q9UHX1;A0A0J9YVR6;E9PQ56;A0A0J9YWM1;H0YEM1;E9PN18;E9PMU7;E9PL19;H0YCP8	11;11;11;11;11;11;11;11;11;11;7;7;7;7;6;5;3;2	Poly(U)-binding-splicing factor PUF60	PUF60	27.1	54.024	499	1.0495	13	0.81944	13
P63172;Q5VTU3	3;1	Dynein light chain Tctex-type 1	DYNLT1	44.2	12.452	113	1.0485	5	1.0632	5
P31689-2;P31689	4;4	DnaJ homolog subfamily A member 1	DNAJA1	13.9	37.044	331	1.0484	7	0.94026	7
P08579	7	U2 small nuclear ribonucleoprotein B	SNRPB2	36	25.486	225	1.0483	14	0.89895	14
Q5VTE0;P68104;P68104-2;A0A087WVQ9;A0A087WV01;Q05639;A6PW80;Q5JR01	18;18;15;15;12;8;4;4	Putative elongation factor 1-alpha-like 3;Elongation factor 1-alpha 1	EEF1A1P5;EEF1A1	40.7	50.184	462	1.048	76	1.0263	76
P52294;Q5TFJ7;C9JYI4;H0Y3K0;C9J352;C9JWD9;F2Z3G4;C9J4U1	4;2;2;1;1;1;1;1	Importin subunit alpha-5	KPNA1;KPNA6	9.3	60.221	538	1.048	2	0.97055	2
F8VVM2;Q00325-2;Q00325;F8VWQ0;F8VZL5;F8VWR4	7;7;6;4;3;3	Phosphate carrier protein, mitochondrial	SLC25A3	32.1	36.161	324	1.0477	16	1.0768	16
Q93099;C9JTX9;H7C5G7;H7C576;H7C4R8	9;5;2;2;1	Homogentisate 1,2-dioxygenase	HGD	23.6	49.963	445	1.0469	9	1.0631	9
Q96IX5	2	Up-regulated during skeletal muscle growth protein 5	USMG5	43.1	6.4575	58	1.0467	2	1.1168	2
Q13409-6;Q13409-3;Q13409-7;Q13409-2;Q13409-5;Q13409;E7EV09;E7EQL5;E9PGG1;E7EUM4;E7ERR6;E7ERH4;E7ET01;E7ETL8;E7EQU2;E7ESD3;E7EMU4;E7EU01	5;5;5;5;5;5;3;3;2;2;2;2;2;2;2;2;2;1	Cytoplasmic dynein 1 intermediate chain 2	DYNC1I2	11.8	68.297	611	1.0466	6	0.9886	6
P42285;H0YAC4;H0Y8U3	5;2;1	Superkiller viralicidic activity 2-like 2	SKIV2L2	5	117.8	1042	1.0466	4	0.97986	4
P11142;E9PKE3;P11142-2;E9PNE6;E9PN89;A8K7Q2;E9PLF4;E9PQQ4;E9PQK7;E9PK54;P54652;E9PPY6;E9PS65;E9PI65;E9PN25;E9PM13	33;32;25;23;18;18;13;12;12;12;11;10;10;9;8;7	Heat shock cognate 71 kDa protein	HSPA8	59.3	70.897	646	1.0461	99	1.0253	99
P25786;P25786-2;B4DEV8;F5GX11	3;3;2;2	Proteasome subunit alpha type-1;Proteasome subunit alpha type	PSMA1	13.7	29.555	263	1.046	3	1.1123	3
H7C4M9;C9JZG9;C9JZY6;P62256-2;P62256;C9J8Q9	3;3;3;3;3;1	Ubiquitin-conjugating enzyme E2 H	UBE2H	64.5	7.0801	62	1.046	3	1.0771	3
E7EU96;P68400;Q5U5J2;Q8NEV1;P68400-2;A0A087WY74	7;7;7;6;3;2	Casein kinase II subunit alpha;Casein kinase II subunit alpha 3	CSNK2A1;CSNK2A3	22.9	45.31	385	1.045	10	0.92707	10
P35998;P35998-2;C9JLS9	17;10;7	26S protease regulatory subunit 7	PSMC2	42.7	48.633	433	1.0445	16	1.0071	16
P52907;C9JUG7;P47755-2;F8W9N7;A0A0D9SET8	5;1;1;1;1	F-actin-capping protein subunit alpha-1	CAPZA1	25.9	32.922	286	1.0444	3	1.2169	3
H0YL55;H7BXE3;Q9NWH9;H0YLW7;H0YMW8;H0YNF3;H0YMR6;H0YLE6;H0YKU6	2;2;2;1;1;1;1;1;1	SAFB-like transcription modulator	SLTM	12.7	25.168	229	1.0419	3	1.101	3
P55884;P55884-2;C9JZG1;C9JQN7	25;25;12;8	Eukaryotic translation initiation factor 3 subunit B	EIF3B	33.3	92.48	814	1.0418	56	1.0096	56
O43395-3;O43395	2;2	U4/U6 small nuclear ribonucleoprotein Prp3	PRPF3	6	31.888	281	1.0418	5	0.92443	5
Q9GZS1-2;Q9GZS1	3;3	DNA-directed RNA polymerase I subunit RPA49	POLR1E	7.4	47.26	419	1.0417	3	0.959	3
P09382;F8WEI7	8;2	Galectin-1	LGALS1	71.9	14.716	135	1.0412	17	1.0764	17
A6ND22;Q9Y3D3-2;Q9Y3D3	3;3;3	28S ribosomal protein S16, mitochondrial	MRPS16	39.4	11.15	99	1.041	6	0.8722	6
Q10567-4;Q10567-3;Q10567-2;Q10567	10;10;10;10	AP-1 complex subunit beta-1	AP1B1	12.7	101.35	919	1.0408	2	1.1565	2
Q8N163-2;Q8N163;H0YC69;E5RGU7;E5RFJ3;H0YC58;G3V119;H0YB24;A0A087X2B6;E5RHJ4	7;7;3;3;3;3;3;3;2;1	DBIRD complex subunit KIAA1967	KIAA1967	8.8	103.14	923	1.0408	11	1.0861	11
P62314;J3QLI9;J3QLR7	3;2;1	Small nuclear ribonucleoprotein Sm D1	SNRPD1	20.2	13.281	119	1.0406	13	0.97748	13
Q9BYN0	2	Sulfiredoxin-1	SRXN1	13.9	14.259	137	1.0404	5	0.91178	5
P62333;A0A087X2I1;H0YJC0;H0YJS8;H0YJX2;H0YJE9;H0YJT1	6;6;3;2;1;1;1	26S protease regulatory subunit 10B	PSMC6	17.7	44.172	389	1.0403	9	0.96721	9
Q96EL2;F8VYR5	2;1	28S ribosomal protein S24, mitochondrial	MRPS24	10.2	19.015	167	1.0403	2	0.92168	2
Q15424-2;Q15424;Q15424-4;Q15424-3;Q14151	2;2;2;2;2	Scaffold attachment factor B1;Scaffold attachment factor B2	SAFB;SAFB2	2.2	95.18	848	1.04	2	1.0313	2
P62191;P62191-2;G3V4X1	12;10;1	26S protease regulatory subunit 4	PSMC1	32.5	49.184	440	1.0399	12	1.0195	12
P00167-2;P00167;P00167-3;J3KNC7	3;3;2;1	Cytochrome b5	CYB5A	44.9	11.268	98	1.0397	3	1.11	3
P20290-2;P20290;H0Y9Y1;D6RDG3	4;4;3;3	Transcription factor BTF3	BTF3	34	17.699	162	1.0395	6	1.1031	6
P30084	6	Enoyl-CoA hydratase, mitochondrial	ECHS1	30	31.387	290	1.0393	7	1.0277	7
Q9BQC6	1	Ribosomal protein 63, mitochondrial	MRP63	12.7	12.266	102	1.0388	3	0.91882	3
Q03252;J9JID7	5;5	Lamin-B2	LMNB2	8.1	69.948	620	1.0386	3	0.86332	3
P05362;E7ESS4	2;1	Intercellular adhesion molecule 1	ICAM1	4.3	57.825	532	1.0382	3	1.2238	3
P63010-3;P63010;P63010-2;A0A087WU93;A0A087WZQ6;C9J1E7;A0A087X253;A0A087WYD1;K7ERB2;K7EJ01;H7C034;K7EN71	10;10;10;9;9;8;8;7;2;2;2;1	AP-2 complex subunit beta	AP2B1;AP1B1	12.2	98.117	880	1.0379	12	1.049	12
Q96EY7;Q96EY7-2;B8ZZQ4	7;2;1	Pentatricopeptide repeat domain-containing protein 3, mitochondrial	PTCD3	13.6	78.549	689	1.0377	7	0.87728	7
P53992;G5EA31;P53992-2	14;13;5	Protein transport protein Sec24C	SEC24C	14.8	118.32	1094	1.0375	23	1.0268	23
Q9H1A7;Q9GZM3;A0A0B4J2F8;P52435;F8WF84;F6S314;E2QRJ6;A6NFM0	1;1;1;1;1;1;1;1	DNA-directed RNA polymerase II subunit RPB11-b2;DNA-directed RNA polymerase II subunit RPB11-b1;DNA-directed RNA polymerase II subunit RPB11-a	POLR2J3;POLR2J2;POLR2J	8.7	13.092	115	1.037	2	0.94028	2
P84103-2;P84103;A0A087X2D0	8;8;5	Serine/arginine-rich splicing factor 3	SRSF3	54.8	14.203	124	1.0367	23	0.94169	24
Q7KZF4;H7C597	34;7	Staphylococcal nuclease domain-containing protein 1	SND1	44	102	910	1.0362	68	1.0575	67
P30086	8	Phosphatidylethanolamine-binding protein 1;Hippocampal cholinergic neurostimulating peptide	PEBP1	56.1	21.057	187	1.036	15	0.98366	15
Q06830;A0A0A0MSI0;A0A0A0MRQ5	18;14;9	Peroxiredoxin-1	PRDX1	77.4	22.11	199	1.0359	43	1.0922	43
Q7Z478;A0A087WYN9	2;2	ATP-dependent RNA helicase DHX29	DHX29	1.3	155.23	1369	1.0359	3	1.0163	3
P25705;P25705-2;P25705-3;K7ERX7;K7EK77;K7EJP1;K7ENJ4;K7EQH4;K7ESA0	16;15;14;7;7;5;5;4;2	ATP synthase subunit alpha, mitochondrial	ATP5A1	34.9	59.75	553	1.0359	31	1.01	31
P20839-3;P20839-7;P20839-5;P20839-6;C9K0R9;P20839-2;P20839-4;C9J381;P20839;F8WDE9;C9J029	4;4;4;4;3;3;3;3;3;1;1	Inosine-5-monophosphate dehydrogenase 1;Inosine-5-monophosphate dehydrogenase	IMPDH1	10.1	60.437	563	1.0359	3	0.97695	3
P51991;H7C1J8	19;1	Heterogeneous nuclear ribonucleoprotein A3	HNRNPA3	43.1	39.594	378	1.0356	43	1.0862	43
P50991;P50991-2	15;14	T-complex protein 1 subunit delta	CCT4	33	57.924	539	1.0354	33	1.0723	33
P58546;C9JL85	3;1	Myotrophin	MTPN	38.1	12.895	118	1.0354	3	0.97132	3
G3V198;Q12769;E9PR16	3;3;2	Nuclear pore complex protein Nup160	NUP160	2.7	148.86	1314	1.0354	3	0.92536	3
O14745;O14745-2;J3QRP6	4;2;2	Na(+)/H(+) exchange regulatory cofactor NHE-RF1	SLC9A3R1	13.1	38.868	358	1.0353	4	1.0406	4
Q96DI7;Q96DI7-2;Q9NSS8	2;2;1	U5 small nuclear ribonucleoprotein 40 kDa protein	SNRNP40;DKFZp434D199	6.2	39.31	357	1.0352	3	1.1017	3
P41091;Q2VIR3;Q2VIR3-2;F8W810;H7BZU1	16;12;9;9;6	Eukaryotic translation initiation factor 2 subunit 3;Putative eukaryotic translation initiation factor 2 subunit 3-like protein	EIF2S3;EIF2S3L	41.1	51.109	472	1.0352	18	0.97482	18
Q6S8J3;P0CG38;P0CG39;Q9BYX7	9;7;5;4	POTE ankyrin domain family member E;POTE ankyrin domain family member I;POTE ankyrin domain family member J	POTEE;POTEI;POTEJ	10.1	121.36	1075	1.0351	2	0.90764	2
R4GMT0;P61163;P42025	2;2;1	Alpha-centractin;Beta-centractin	ACTR1A;ACTR1B	7.8	37.433	332	1.0349	3	1.1991	3
F8W7Q4;Q96A26	1;1	Protein FAM162A	FAM162A	7.6	16.515	144	1.0349	2	1.0396	2
Q15437;Q5QPE2;Q5QPE1	13;7;4	Protein transport protein Sec23B	SEC23B	21.8	86.478	767	1.0349	24	1.0033	24
P51659;E7ER27;E7EWE5;P51659-3;P51659-2;G5E9S2;E7ET17;E7EPL9	11;10;9;9;9;5;5;4	Peroxisomal multifunctional enzyme type 2;(3R)-hydroxyacyl-CoA dehydrogenase;Enoyl-CoA hydratase 2	HSD17B4	19.6	79.685	736	1.0344	17	1.1243	17
Q9Y230;Q9Y230-2;M0R0Y3;X6R2L4;M0QXI6;M0R0Z0	11;10;7;3;2;1	RuvB-like 2	RUVBL2	28.7	51.156	463	1.0342	9	0.94947	9
P20042	10	Eukaryotic translation initiation factor 2 subunit 2	EIF2S2	32.1	38.388	333	1.0341	13	1.0677	13
P49368;P49368-2;B4DUR8;E9PRC8;Q5SZX6;Q5SZX9;E9PM09;E9PQ35;Q5SZW8	22;21;19;6;5;4;3;2;2	T-complex protein 1 subunit gamma	CCT3	45	60.533	545	1.0327	33	1.0991	33
O15371-2;O15371-3;O15371;B0QYA5;B0QYA4;B0QYA8;B0QYA6	6;6;6;2;1;1;1	Eukaryotic translation initiation factor 3 subunit D	EIF3D	13.4	58.14	499	1.0327	12	1.0914	12
Q14204;H0YJ21	178;8	Cytoplasmic dynein 1 heavy chain 1	DYNC1H1	43.3	532.4	4646	1.0327	189	1.0132	189
P08195-2;P08195-3;F5GZS6;P08195;J3KPF3;P08195-4;H0YFS2;F5H0E2;F5GZI0;H0YFX4;F5H867	11;11;11;11;11;11;4;3;3;2;1	4F2 cell-surface antigen heavy chain	SLC3A2	23.6	57.944	529	1.0326	18	1.0744	18
Q96CT7;M0R2F5	8;4	Coiled-coil domain-containing protein 124	CCDC124	33.2	25.835	223	1.0325	12	1.1133	12
P04080	4	Cystatin-B	CSTB	55.1	11.139	98	1.0322	10	1.0944	10
Q9NYU2-2;Q9NYU2;F8WCI2;F8WCE6	11;11;1;1	UDP-glucose:glycoprotein glucosyltransferase 1	UGGT1	8	174.97	1531	1.0322	12	0.93918	12
O15144;H7C3F9;G5E9S7;C9JTV5;G5E9J0	3;2;1;1;1	Actin-related protein 2/3 complex subunit 2	ARPC2	11	34.333	300	1.0321	3	1.0826	3
P23246;P23246-2;H0Y9K7	12;11;1	Splicing factor, proline- and glutamine-rich	SFPQ	18.7	76.149	707	1.0318	22	0.9803	22
Q9H0D6-2;Q9H0D6	5;5	5-3 exoribonuclease 2	XRN2	6.6	99.96	874	1.0315	5	1.0552	5
P62318-2;P62318;H3BT13	4;4;2	Small nuclear ribonucleoprotein Sm D3	SNRPD3	39.2	13.291	120	1.0315	14	0.91231	14
P60953;P60953-1;Q5JYX0;F8WET9;B1AH79;G3V4H1;G3V476;P84095;Q9H4E5-2;P17081;A0A0C4DH03;Q9H4E5	4;3;2;1;1;1;1;1;1;1;1;1	Cell division control protein 42 homolog	CDC42	22.5	21.258	191	1.0308	3	1.0715	3
Q15024	3	Exosome complex component RRP42	EXOSC7	13.1	31.821	291	1.0305	3	1.2455	3
P12081-3;P12081-2;P12081-4;P12081;B4E1C5;B4DDD8;B3KWE1;E7ETE2;D6RF05	10;10;10;10;8;8;8;7;2	Histidine--tRNA ligase, cytoplasmic	HARS	22.3	50.156	449	1.0303	7	0.91971	7
P35606-2;P35606;H0YAC7;D6RBT6;D6R997	12;12;2;1;1	Coatomer subunit beta	COPB2	16.9	99.045	877	1.0302	12	0.98731	12
O94906;O94906-2	5;4	Pre-mRNA-processing factor 6	PRPF6	5.8	106.92	941	1.0302	6	0.73791	6
Q07666-2;Q07666;Q07666-3	3;3;2	KH domain-containing, RNA-binding, signal transduction-associated protein 1	KHDRBS1	9.1	45.86	418	1.0297	5	1.0306	5
Q15417-3;Q15417;E9PDU6;Q15417-2	2;2;1;1	Calponin-3	CNN3	7.8	31.38	283	1.0295	2	1.1456	2
Q7L576;Q7L576-2;Q7L576-3;A0A0G2JR96;A0A0G2JQT1;H7C229;E7EVJ5;Q96F07-2;Q96F07;E7EW33;A0A0G2JRX2;A0A087WU52;A0A0G2JRV9;A0A087WWL1;H0YL50;A0A087WVE1;A0A087WTQ3;A0A087WWZ1;A0A087WV63;A0A0G2JRF5;A0A087WWY5;A0A0G2JQH3;A0A087WVZ5	12;8;7;5;5;5;5;5;5;4;2;2;2;2;2;2;2;2;1;1;1;1;1	Cytoplasmic FMR1-interacting protein 1	CYFIP1	10.5	145.18	1253	1.0295	9	1.07	9
O00442;O00442-2	5;5	RNA 3-terminal phosphate cyclase	RTCA	14.2	39.336	366	1.0295	9	0.82019	9
Q96QK1	7	Vacuolar protein sorting-associated protein 35	VPS35	9.8	91.706	796	1.0275	10	1.0309	10
P12814-2;P12814;P12814-3;P12814-4;H9KV75;P35609-2;P35609;G3V2W4;G3V2N5;H7C5W8;Q08043;G3V2X9;A0A087WSZ2;H0YJ11;F6THM6;H0YJW3;G3V2E8;G3V5M4;D6RH00	26;26;26;26;23;11;11;9;9;9;9;7;6;5;5;4;3;3;1	Alpha-actinin-1	ACTN1	32	102.71	887	1.0273	8	1.1865	8
P62942;Q5W0X3;A0A087WZM5;Q1JUQ3;Q1JUQ5;A0A087WTS4;A0A087WV48	3;2;2;1;1;1;1	Peptidyl-prolyl cis-trans isomerase FKBP1A;Peptidyl-prolyl cis-trans isomerase	FKBP1A	41.7	11.951	108	1.0272	7	1.2453	7
P61604;B8ZZL8;B8ZZ54;S4R3N1	9;7;4;4	10 kDa heat shock protein, mitochondrial	HSPE1	69.6	10.932	102	1.027	17	1.1066	17
U3KQ55;K7ES38;K7EPL2;Q9UBT2	1;1;1;1	SUMO-activating enzyme subunit 2	UBA2	27.8	5.5314	54	1.0263	2	0.98427	2
Q9Y4Z0;V9GZ56;M0QXB0;U3KQS7;U3KQK1	3;3;2;2;1	U6 snRNA-associated Sm-like protein LSm4	LSM4	21.6	15.35	139	1.026	5	0.96456	5
Q15365;F8VTZ0	6;1	Poly(rC)-binding protein 1	PCBP1	20.8	37.497	356	1.0258	16	1.0309	16
P14735;P14735-2	3;1	Insulin-degrading enzyme	IDE	3.4	117.97	1019	1.0258	3	1.0077	3
P08238;Q58FF7;Q58FG1	40;17;1	Heat shock protein HSP 90-beta	HSP90AB1	49.2	83.263	724	1.0256	138	1.0675	138
Q5QNZ2;P24539	4;4	ATP synthase subunit b, mitochondrial	ATP5F1	23.6	22.275	195	1.0254	7	0.92657	7
Q9UNF0-2;Q9UNF0;B0QYG7;B0QYG8	3;3;1;1	Protein kinase C and casein kinase substrate in neurons protein 2	PACSIN2	6.5	51.353	445	1.0253	3	1.2707	3
D6RAN8;H7C5U8;Q9P0M9	4;3;3	39S ribosomal protein L27, mitochondrial	MRPL27	54.8	10.474	93	1.0251	5	0.91475	5
O14617;O14617-5;O14617-4;O14617-3;O14617-2;A0A087WYN6;K7ELX8;K7ERW8	16;16;15;13;13;3;2;1	AP-3 complex subunit delta-1	AP3D1	15	130.16	1153	1.025	21	0.93624	21
E9PLD0;Q9H0U4;P62820;P62820-2;E7END7;A0A087WTI1;Q92928;H0YMN7;P62820-3;H0YNE9;Q92930;P61006-2;P61006;H0YLJ8;H0YL94;P51153;P59190-2;P59190	7;7;5;4;4;3;3;2;2;2;2;2;2;1;1;1;1;1	Ras-related protein Rab-1B;Ras-related protein Rab-1A	RAB1B;RAB1A	44.4	18.483	169	1.0248	15	1.0272	15
Q9BUJ2-4;A0A0A0MRA5;B7Z4B8;Q9BUJ2-2;Q9BUJ2;Q9BUJ2-3;M0R3F1;M0QYZ0;M0R203;M0QZV6;M0R0K8;M0QYI8;M0QYM5	13;13;13;13;13;11;10;9;3;3;3;2;1	Heterogeneous nuclear ribonucleoprotein U-like protein 1	HNRNPUL1	22.4	84.793	756	1.0248	31	0.89039	31
P78371;F5GWF6;P78371-2;F8VQ14	20;19;18;17	T-complex protein 1 subunit beta	CCT2	46.4	57.488	535	1.0245	40	1.0405	40
P11498;P11498-2;E9PRE7;E9PS68	29;12;10;8	Pyruvate carboxylase, mitochondrial	PC	29.5	129.63	1178	1.0245	37	0.99074	37
Q02978-2;I3L1P8;Q02978	1;1;1	Mitochondrial 2-oxoglutarate/malate carrier protein	SLC25A11	3.8	28.494	263	1.0242	2	1.138	2
Q14678-2;Q14678	2;2	KN motif and ankyrin repeat domain-containing protein 1	KANK1	1.7	129.78	1194	1.0231	2	1.1413	2
F1T0B3;A0A087X2G1;Q92499;Q92499-3;Q92499-2	9;9;9;8;4	ATP-dependent RNA helicase DDX1	DDX1	17.1	73.915	659	1.0228	17	1.0364	17
E9PCY7;P31943;G8JLB6;E5RGV0;D6RIU0;D6RBM0;H0YB39;P55795;E5RGH4;E7EQJ0;D6RAM1;D6R9T0;D6RFM3;D6RIT2;E7EN40;D6RDU3;D6RJ04;D6RIH9;H0YBG7;H0YBD7;D6R9D3;D6RF17;D6RDL0;H0YAQ2	5;5;5;3;3;3;3;3;2;2;2;2;2;2;2;2;2;2;2;2;1;1;1;1	Heterogeneous nuclear ribonucleoprotein H;Heterogeneous nuclear ribonucleoprotein H, N-terminally processed;Heterogeneous nuclear ribonucleoprotein H2;Heterogeneous nuclear ribonucleoprotein H2, N-terminally processed	HNRNPH1;HNRNPH2	17	47.087	429	1.0223	26	1.0617	26
E5RHG8;Q15369-2;Q15369;R4GMY8	3;3;3;2	Transcription elongation factor B polypeptide 1	TCEB1	34.8	9.9601	89	1.0221	8	1.1215	8
Q96I59;E9PRK2;Q96I59-2;H0YEL9;H0YE96	6;3;3;2;1	Probable asparagine--tRNA ligase, mitochondrial	NARS2	15.7	54.089	477	1.0221	8	0.89969	8
P08243-2;P08243;P08243-3;C9JLN6;C9JM09;C9JT45;C9J057;F8WEJ5	3;3;2;1;1;1;1;1	Asparagine synthetase [glutamine-hydrolyzing]	ASNS	6.1	62.168	540	1.0216	5	1.0938	5
Q99832-3;Q99832;Q99832-4;Q99832-2;F8WAM2	14;14;12;9;4	T-complex protein 1 subunit eta	CCT7	33.7	54.804	499	1.0215	26	1.0191	26
P05141;Q9H0C2	10;3	ADP/ATP translocase 2;ADP/ATP translocase 2, N-terminally processed	SLC25A5	32.6	32.852	298	1.021	29	0.98117	29
Q8NBS9-2;Q86UY0;Q8NBS9	5;5;5	Thioredoxin domain-containing protein 5	TXNDC5	16.4	36.177	324	1.0208	5	1.011	5
E7ES33;Q16181-2;Q16181;E7EPK1;G3V1Q4;H0Y3Y4;Q5JXL7;Q6ZU15	6;6;6;6;5;4;2;1	Septin-7	2016-09-07	16.3	48.715	417	1.0205	6	0.99769	6
E9PDM8;O94855;O94855-2;E9PC44	6;6;6;5	Protein transport protein Sec24D	SEC24D	11.3	74.953	663	1.0204	9	1.0758	9
O76003	2	Glutaredoxin-3	GLRX3	7.2	37.432	335	1.0197	3	1.1927	3
P55072;C9IZA5;C9JUP7	40;7;6	Transitional endoplasmic reticulum ATPase	VCP	58.8	89.321	806	1.0196	77	1.0344	77
Q9Y2T2	5	AP-3 complex subunit mu-1	AP3M1	16.3	46.939	418	1.0192	4	0.93112	4
Q5HY54;P21333-2;P21333;Q60FE5;A0A087WWY3;F8WE98;H0Y5C6;H0Y5F3;H7C2E7	92;92;92;91;79;22;9;4;1	Filamin-A	FLNA	45.9	276.55	2607	1.0188	100	1.0539	101
P46060;H0Y4Q3;B0QYT5;B0QYT4;B0QYT6	7;4;2;2;1	Ran GTPase-activating protein 1	RANGAP1	14.5	63.541	587	1.0187	5	1.0477	5
Q01518-2;Q01518;Q5T0R7;Q5T0R6;Q5T0R5;Q5T0R4;Q5T0R3;Q5T0R2;Q5T0R1;Q5T0R9;P40123-3;B7Z385;A0A087X0J3;A0A087WZ15;P40123-2;E9PDI2;P40123	8;8;3;3;3;3;3;3;3;3;1;1;1;1;1;1;1	Adenylyl cyclase-associated protein 1	CAP1	18.4	51.83	474	1.0186	14	1.0382	14
P09327;P09327-2;B4DV78;H7C0B6;C9J2B5;O75366-2;O75366	20;10;10;5;3;1;1	Villin-1	VIL1	29.6	92.694	827	1.0182	28	0.88445	28
P31948;P31948-2;P31948-3;F5GXD8;F5H783;H0YGI8	17;17;14;7;7;3	Stress-induced-phosphoprotein 1	STIP1	30	62.639	543	1.018	16	1.0428	16
P35579;P35579-2;Q5BKV1;A0A0C4DFM8;B1AH99;A1L2Z2;E7ERA5;REV__S4R3H4;REV__E7EQT4;REV__Q9UKV3-5;REV__Q9UKV3;P12883;P13535;Q9UKX3;Q9Y623;P13533;P12882;P11055;Q9UKX2;A7E2Y1;A0A087X0T3	61;41;4;3;2;2;1;1;1;1;1;1;1;1;1;1;1;1;1;1;1	Myosin-9	MYH9	34.3	226.53	1960	1.0176	64	0.95432	64
Q5JPE7-2;Q15155;P69849;Q5JPE7;J3KN36;A0A0G2JN29;A0A087X117;Q5JPE7-3;A0A0G2JP90;A0A087WW46;H3BUC9;A0A087WTD5	8;8;8;8;8;8;8;7;7;7;1;1	Nodal modulator 2;Nodal modulator 1;Nodal modulator 3	NOMO2;NOMO1;NOMO3	6.7	134.19	1222	1.0173	5	1.0973	5
O75400-2;O75400-3;O75400;H0YG38;F5H578	5;5;5;1;1	Pre-mRNA-processing factor 40 homolog A	PRPF40A	5.4	105.93	930	1.0173	4	0.91162	4
P07737;K7EJ44;CON__P02584;I3L3D5	10;8;4;3	Profilin-1	PFN1	70	15.054	140	1.0172	33	1.0909	33
P46939;P46939-2;P46939-4;Q5T097;H0Y337;P46939-3	19;19;5;2;1;1	Utrophin	UTRN	6.1	394.46	3433	1.0171	18	0.99191	18
O14980;C9IZS4;C9JQ02;C9JV99;C9J673;C9JKM9;C9JF49;C9IYM2;H7BZC5;F8WF71	6;2;2;2;2;2;1;1;1;1	Exportin-1	XPO1	5.2	123.38	1071	1.0168	10	1.195	10
Q9BQ52-4;Q9BQ52;G5E9D5;E7ES68;Q9BQ52-3;Q9BQ52-2;V9GZ72;V9GYS7;H7C2I4;J3QRS2;V9GYU5;J3QL08;J3QLK4	7;7;6;5;4;3;2;2;2;1;1;1;1	Zinc phosphodiesterase ELAC protein 2	ELAC2	8.8	87.563	786	1.0165	9	0.94296	9
A0A087WTT1;P11940-2;P11940;E7EQV3;E7ERJ7;Q9H361;H0YAR2;H0YBN4;E5RGH3;E5RJB9;E5RH24;Q4VXU2;H0YAP2;H0YB86;E5RHG7;H0YEQ8;Q4VXU2-2;H0YC10;E5RGC4;E5RFD8;H0YAS7;H0YAS6;H0YB75;Q5JQF8;Q96DU9-2;Q96DU9	14;14;14;13;12;8;7;6;5;5;4;4;3;3;2;2;2;1;1;1;1;1;1;1;1;1	Polyadenylate-binding protein 1;Polyadenylate-binding protein 3	PABPC1;PABPC3	30.8	58.535	522	1.0164	31	0.89927	31
P02545;P02545-6;P02545-3;P02545-5;P02545-4;H0YAB0;A0A0C4DGC5	35;34;34;27;27;14;7	Prelamin-A/C;Lamin-A/C	LMNA	52.6	74.139	664	1.0162	63	0.98203	63
Q14683;G8JLG1;V9GY57;V9GYN9;H0Y7K8	6;5;2;1;1	Structural maintenance of chromosomes protein 1A	SMC1A	5.1	143.23	1233	1.0161	4	1.0551	4
Q9Y4C2-2;Q9Y4C2	4;4	Protein FAM115A	FAM115A	4.6	101.89	919	1.0155	3	1.2792	3
A0A0G2JLD8;E7EUY5;Q04837;C9K0U8	5;5;5;4	Single-stranded DNA-binding protein, mitochondrial	SSBP1	36.6	15.598	134	1.0155	9	1.0392	9
Q9NTK5;J3KQ32;Q9NTK5-3;Q9NTK5-2;C9JTK6;C9JCJ9	27;27;18;16;8;7	Obg-like ATPase 1	OLA1	68.2	44.743	396	1.0155	55	0.85823	55
K7EL96;O60664-4;O60664-3;O60664;K7ER39;K7ERZ3	2;2;2;2;1;1	Perilipin-3	PLIN3	18	17.962	172	1.0153	2	1.0672	2
Q86VP6;Q86VP6-2;A0A0C4DGH5;Q86VP6-3;H0YH27	18;16;12;5;5	Cullin-associated NEDD8-dissociated protein 1	CAND1	17.2	136.37	1230	1.0151	25	1.1877	25
P19784;H3BNI9;H3BSA1;H3BV19	3;2;2;1	Casein kinase II subunit alpha	CSNK2A2	11.1	41.213	350	1.0151	3	1.0334	3
X1WI22;D6RAA2;Q5SQT8;D6RDB2;D6RD69;Q9Y6B6;Q9NR31	1;1;1;1;1;1;1	GTP-binding protein SAR1b;GTP-binding protein SAR1a	SAR1B;SAR1A	22	5.7567	50	1.0151	2	1.0009	2
J3KTF8;P52565;J3QQX2;J3KRE2;P52565-2;J3KRY1;J3KS60	3;3;3;2;2;2;1	Rho GDP-dissociation inhibitor 1	ARHGDIA	20.2	21.517	193	1.015	3	1.1668	3
Q99613-2;Q99613;B5ME19;H3BPE3;H3BPE4;H3BTY8	23;23;22;2;2;1	Eukaryotic translation initiation factor 3 subunit C;Eukaryotic translation initiation factor 3 subunit C-like protein	EIF3C;EIF3CL	23.5	104.1	903	1.0148	63	0.95498	63
P50395;P50395-2;Q5SX87;Q5SX91;V9GYF8;Q5SX90;Q5SX86;V9GYJ7;P31150;G5E9U5	13;12;6;4;3;3;3;2;2;1	Rab GDP dissociation inhibitor beta	GDI2	38	50.663	445	1.0147	16	1.071	16
H3BUX2;O43169;J3KNF8;D6RFH4;J3QR91	3;3;3;2;1	Cytochrome b5 type B	CYB5B	28.6	15.716	140	1.0144	4	0.99642	4
O43707;O43707-2;O43707-3;F5GXS2;H7C144;K7EJH8;K7EP19	55;36;30;30;17;8;7	Alpha-actinin-4	ACTN4	63.2	104.85	911	1.0143	132	1.0077	132
C9JFR7;P99999;CON__P62894	5;5;1	Cytochrome c	CYCS	40.6	11.333	101	1.014	11	0.98951	11
P04843;B7Z4L4;F8WF32	24;17;5	Dolichyl-diphosphooligosaccharide--protein glycosyltransferase subunit 1	RPN1	45.8	68.569	607	1.0137	27	1.0689	27
P04844-2;P04844;Q5JYR4;Q5JYR7;H0Y5M1;F2Z3K5;Q5JYR3	12;12;4;4;2;2;1	Dolichyl-diphosphooligosaccharide--protein glycosyltransferase subunit 2	RPN2	30.2	67.723	615	1.0136	16	1.0316	16
Q8NE71-2;Q8NE71;H0YGW7;A0A0G2JIC2;F5GYK6;Q5STZ8	5;5;4;2;1;1	ATP-binding cassette sub-family F member 1	ABCF1	6.7	91.679	807	1.0131	5	1.1599	5
Q9ULV4;Q9ULV4-2;Q9ULV4-3;B4E3S0;H0YHL7;F8W1H8;F8VUX3;F8VSA4;F8VRE9;F8VTT6;F8VVB7;F8VV53	5;5;5;4;3;2;2;2;2;2;2;1	Coronin-1C;Coronin	CORO1C	9.1	53.248	474	1.0131	5	1.0017	5
P15311;E7EQR4;E9PQ82	19;19;3	Ezrin	EZR	34.5	69.412	586	1.0129	27	1.0983	27
Q9UPN3;H3BPE1;H3BQK9;H0Y390;Q9UPN3-4;Q9UPN3-3;Q9UPN3-2;Q9UPN3-5;H0YD69;E9PNZ4	7;7;7;6;6;6;6;6;2;1	Microtubule-actin cross-linking factor 1, isoforms 1/2/3/5	MACF1	1.1	838.3	7388	1.0129	6	0.92583	6
Q9NXG2;H3BNW0	8;2	THUMP domain-containing protein 1	THUMPD1	24.9	39.315	353	1.0127	9	1.0515	9
Q15029-2;Q15029;Q15029-3;K7EP67;K7EJ74	16;16;15;7;5	116 kDa U5 small nuclear ribonucleoprotein component	EFTUD2	21.5	105.38	937	1.0126	28	0.93548	28
A0A0C4DGS1;P39656;P39656-3;P39656-2;U3KQ84	9;9;8;7;5	Dolichyl-diphosphooligosaccharide--protein glycosyltransferase 48 kDa subunit	DDOST	21.2	48.799	439	1.0124	16	1.0384	16
H7C3I1;Q8IZP2;A0A087X1H6;P50502;F6VDH7;Q3KNR6;Q8NFI4	5;5;5;5;4;4;2	Putative protein FAM10A4;Hsc70-interacting protein	ST13;ST13P4	43.2	16.219	146	1.0122	6	1.0619	6
Q86SW4;P36957;H0YJF9;G3V5M3;G3V3F0;P36957-2	2;2;1;1;1;1	Dihydrolipoyllysine-residue succinyltransferase component of 2-oxoglutarate dehydrogenase complex, mitochondrial	DLST	9.7	29.625	279	1.0122	3	0.87854	3
Q15185-4;Q15185;A0A087WYT3;Q15185-3;B4DDC6;Q15185-2	7;7;7;6;4;2	Prostaglandin E synthase 3	PTGES3	48.2	16.476	139	1.0115	12	1.0937	12
Q9H0U6	2	39S ribosomal protein L18, mitochondrial	MRPL18	10.6	20.576	180	1.0114	3	1.007	3
P84077;P61204;P61204-2;F5H423;F5H0C7;F5H1V1;F5H6T5;F8WDB3;H0YGG7	5;5;4;4;2;1;1;1;1	ADP-ribosylation factor 1;ADP-ribosylation factor 3	ARF1;ARF3	32	20.697	181	1.0113	5	1.0433	5
P84090;G3V279	4;3	Enhancer of rudimentary homolog	ERH	44.2	12.259	104	1.0109	7	1.0221	7
Q13868-3;Q13868;A3KFL5;Q13868-2;A3KFL2;A3KFL1	5;5;4;4;4;2	Exosome complex component RRP4	EXOSC2	25.5	29.408	263	1.0108	5	0.98311	5
K7ER96;O43396;K7EML9	3;3;2	Thioredoxin-like protein 1	TXNL1	13.9	31.355	281	1.0106	3	1.1132	3
H0YHC3;F8W020;F8W118;F8VY35;F8VV59;B7Z9C2;P55209-2;F8W0J6;F5H4R6;H0YIV4;P55209;F8VRJ2;H0YH88;F8VXI6;F8VUX1;P55209-3;F8W543;F8VVB5	6;6;6;6;6;6;6;6;6;6;6;5;5;5;5;5;5;4	Nucleosome assembly protein 1-like 1	NAP1L1	25.8	23.417	198	1.0105	18	1.0119	18
Q13085-3;Q13085-2;Q13085;Q13085-4;Q59FY4;O00763-3;O00763-2;O00763;A0A087X0W4;S4R3S7;A0A087WVR6;A0A087WWN5;A0A0C4DGT1;F8W8T8;H0YGH5	14;14;14;14;8;3;3;3;2;2;1;1;1;1;1	Acetyl-CoA carboxylase 1;Biotin carboxylase	ACACA	6.9	257.24	2268	1.0104	15	1.0339	15
P22307-6;P22307-2;P22307-4;P22307-7;P22307-8;P22307;H0YF61	5;5;5;5;5;5;3	Non-specific lipid-transfer protein	SCP2	36.4	15.079	140	1.0103	7	0.96967	7
P62316;P62316-2;K7ERG4;K7EJB5	9;7;5;3	Small nuclear ribonucleoprotein Sm D2	SNRPD2	67.8	13.527	118	1.0103	24	0.92296	24
P0DMV9;P0DMV8;A0A0G2JIW1;P0DMV8-2;V9GZ37	19;19;19;18;14			35.7	70.051	641	1.0102	17	1.0992	17
Q13151	13	Heterogeneous nuclear ribonucleoprotein A0	HNRNPA0	44.6	30.84	305	1.0101	36	1.0595	36
E9PC52;Q16576;Q16576-2;H0YF10;H0YEU5;Q5JP02;H0YCT5;H0YDK2;Q5JP01;C9J7L0;Q5JNZ6	5;5;5;3;2;2;2;2;2;1;1	Histone-binding protein RBBP7	RBBP7;RBBP4	16.6	46.938	416	1.01	2	1.2223	2
Q9Y3B7-2;Q9Y3B7;Q9Y3B7-3;H0YCD5;E9PQB6	6;6;4;1;1	39S ribosomal protein L11, mitochondrial	MRPL11	42.8	18.205	166	1.01	12	0.9383	12
P37837;F2Z393	11;10	Transaldolase	TALDO1	32	37.54	337	1.0098	15	1.1033	15
P48444;B0YIW6;Q6P1Q5;P48444-2;E9PK34	6;5;4;3;2	Coatomer subunit delta	ARCN1	12.3	57.21	511	1.0098	10	1.0595	10
X6RDA4;Q8WXF1-2;Q8WXF1	5;5;5	Paraspeckle component 1	PSPC1	24.2	27.274	248	1.0097	5	1.083	5
Q9Y678;Q9UBF2-2;Q9UBF2;H0Y8X7;H0Y8G2	21;4;4;3;1	Coatomer subunit gamma-1	COPG1	28.7	97.717	874	1.0094	25	0.96473	25
P50570-3;P50570-2;P50570-5;P50570-4;P50570;A0A0D9SFB1;Q05193-5;Q05193-3;Q05193-2;Q05193;A0A0D9SFE4;K7EMQ3;Q9UQ16-5;E5RHK8;Q9UQ16-2;Q9UQ16-3;Q9UQ16;Q9UQ16-4;E5RIK2;H7C5U0	10;10;10;10;10;4;4;4;4;4;4;3;3;3;3;3;3;3;2;1	Dynamin-2	DNM2	12.6	97.553	866	1.009	7	1.078	7
P78344-2;H0Y3P2;P78344;D3DQV9;E9PKF8	3;3;3;3;2	Eukaryotic translation initiation factor 4 gamma 2	EIF4G2	3.1	98.149	869	1.0086	3	1.2067	3
A0A087WZZ5;E9PPJ0;Q13435;E9PJT3;E9PJ04;H0YCG1;H0YEX5;E9PIL8	6;6;6;3;3;3;2;1	Splicing factor 3B subunit 2	SF3B2	7.7	97.584	871	1.0079	10	0.93787	10
P31946-2;P31946;Q4VY20;Q4VY19;A0A0J9YWE8;A0A0J9YWZ2	8;8;3;3;3;2	14-3-3 protein beta/alpha;14-3-3 protein beta/alpha, N-terminally processed	YWHAB	41.8	27.85	244	1.0077	6	1.0365	6
Q07955;J3KTL2;Q07955-3;Q07955-2;J3KSR8;J3QQV5;J3KSW7	13;13;12;12;5;4;4	Serine/arginine-rich splicing factor 1	SRSF1	47.2	27.744	248	1.0077	17	0.9709	17
Q6P1L8	2	39S ribosomal protein L14, mitochondrial	MRPL14	16.6	15.947	145	1.0076	2	0.92163	2
E5RIZ4;Q9P015;E5RHF4	3;3;2	39S ribosomal protein L15, mitochondrial	MRPL15	14.8	27.236	237	1.0072	3	0.91721	3
H0YCY8;P53634	1;1	Dipeptidyl peptidase 1;Dipeptidyl peptidase 1 exclusion domain chain;Dipeptidyl peptidase 1 heavy chain;Dipeptidyl peptidase 1 light chain	CTSC	4.9	27.725	244	1.0071	2	1.0913	2
C9IZG4;O60888-3;O60888;O60888-2	1;1;1;1	Protein CutA	CUTA	10.4	14.401	135	1.007	2	1.3426	2
P61981	8	14-3-3 protein gamma;14-3-3 protein gamma, N-terminally processed	YWHAG	36	28.302	247	1.0068	7	1.0557	7
P54886-2;P54886	4;4	Delta-1-pyrroline-5-carboxylate synthase;Glutamate 5-kinase;Gamma-glutamyl phosphate reductase	ALDH18A1	5.8	87.088	793	1.0068	6	0.97129	6
P10620;F5H7F6;F5H6X2;P10620-2;F5GX73;F5H613;F5H760	4;3;3;3;1;1;1	Microsomal glutathione S-transferase 1	MGST1	27.1	17.598	155	1.0067	11	1.0943	11
Q14914-2;Q14914;F2Z3J9;Q5JVP2;F6XGT7	7;7;4;2;1	Prostaglandin reductase 1	PTGR1	32.9	32.895	301	1.0066	8	1.113	8
F8VZJ2;H0YHX9;Q13765;E9PAV3-2;E9PAV3;F8W0W4;F8W1N5;F8VNW4;F8VZ58;Q9BZK3	5;5;5;5;5;4;3;3;1;1	Nascent polypeptide-associated complex subunit alpha	NACA	51.5	15.016	136	1.0065	14	1.0532	14
K7EQ03;Q9BTD8-4;Q9BTD8-2;Q9BTD8-3;K7EP90;Q9BTD8;K7EML2	2;2;2;2;2;2;1	RNA-binding protein 42	RBM42	5.9	44.638	426	1.0064	4	0.73463	4
P28482;P28482-2;H0YDH9;K7ELV1;B3KR49;K7EN18;E9PBK7;E9PJF0;P27361-2;E9PQW4;P27361-3;P27361;P31152;Q16659	7;5;1;1;1;1;1;1;1;1;1;1;1;1	Mitogen-activated protein kinase 1	MAPK1	20.6	41.389	360	1.0062	10	1.0819	10
A5YKK6-2;A5YKK6;A5YKK6-3;A5YKK6-4;B5MDN3;H3BMZ2	4;4;3;2;1;1	CCR4-NOT transcription complex subunit 1	CNOT1	1.8	266.38	2371	1.006	2	1.18	2
Q9Y2R0;K7EPV0	3;2	Cytochrome c oxidase assembly protein 3 homolog, mitochondrial	COA3	26.4	11.731	106	1.006	4	1.1406	4
B1AK87;P47756-2;B1AK88;P47756;B1AK85	7;7;7;5;4	F-actin-capping protein subunit beta	CAPZB	29.6	29.295	260	1.006	6	1.1344	6
P17096;P17096-3	3;3	High mobility group protein HMG-I/HMG-Y	HMGA1	23.4	11.676	107	1.006	7	1.0084	7
M0R080;P25685-2;P25685;M0R1D6;M0QZD0;M0QYT3;M0QXK0;Q9UDY4	3;3;3;1;1;1;1;1	DnaJ homolog subfamily B member 1	DNAJB1	25.1	20.497	183	1.0057	4	0.97915	4
H0Y6I0;Q13439-3;Q13439-4;Q13439;Q13439-5;C9JHJ5;A0A087WTW2;E7EVX2	6;6;6;6;6;2;1;1	Golgin subfamily A member 4	GOLGA4	3	246.6	2099	1.0051	6	0.9985	6
P41567;K7EM18;O60739	3;3;2	Eukaryotic translation initiation factor 1;Eukaryotic translation initiation factor 1b	EIF1;EIF1B	41.6	12.732	113	1.0049	5	0.97944	5
P09661;H0YKK0;H0YMA0;H0YLR3	10;6;5;4	U2 small nuclear ribonucleoprotein A	SNRPA1	39.2	28.415	255	1.0049	12	0.86748	12
H3BPZ1;Q9P035;H3BS72;H3BMZ1;H3BRL8;Q9P035-2	2;2;2;1;1;1	Very-long-chain (3R)-3-hydroxyacyl-[acyl-carrier protein] dehydratase 3	PTPLAD1	7.4	40.069	337	1.0048	5	1.0656	5
Q9Y5B9;G3V5A4;G3V401;G3V2X0	11;1;1;1	FACT complex subunit SPT16	SUPT16H	10.8	119.91	1047	1.0046	15	1.0873	15
H3BRU6;Q15366-7;F8VZX2;Q15366-8;Q15366-4;Q15366-5;Q15366-6;Q15366-3;Q15366;Q15366-2;F8VXH9;F8W0G4;F8W1G6;F8VRH0;J3QT27;P57721-2;P57721-3;P57721-5;E9PFP8;P57721-4;P57721;H3BND9;H3BSS4	5;5;5;5;5;5;5;5;5;5;4;3;3;2;2;2;2;2;2;2;2;1;1	Poly(rC)-binding protein 2	PCBP2	21.6	31.6	301	1.0046	9	1.0521	9
O75394	2	39S ribosomal protein L33, mitochondrial	MRPL33	38.5	7.6191	65	1.003	4	0.90711	4
Q9Y490;Q9Y4G6;H0YMT1	79;9;6	Talin-1	TLN1	40.4	269.76	2541	1.0026	105	1.0787	105
E9PEX6;P09622;P09622-2;P09622-3;F8WDM5;F2Z2E3	8;8;7;7;1;1	Dihydrolipoyl dehydrogenase, mitochondrial	DLD	20.2	51.815	486	1.0025	8	0.99737	8
P55145;A8K878	2;2	Mesencephalic astrocyte-derived neurotrophic factor	MANF	9.9	20.7	182	1.0025	2	0.99424	2
Q9Y2X3;H7BZ72;F8WED0	7;3;1	Nucleolar protein 58	NOP58	16.1	59.578	529	1.0025	11	0.92086	11
B9A041;P40925-2;P40925;P40925-3;B8ZZ51;C9JRL4;C9JF79	3;3;3;3;2;1;1	Malate dehydrogenase, cytoplasmic	MDH1	20	23.038	210	1.0024	3	1.2652	3
P11021	27	78 kDa glucose-regulated protein	HSPA5	45.4	72.332	654	1.0022	45	1.0099	45
P28838-2;P28838;H0Y9Q1	8;8;3	Cytosol aminopeptidase	LAP3	22.1	52.771	488	1.0019	8	1.0167	8
P63167;F8VXL2;F8VRV5;F8VXI7	5;2;2;1	Dynein light chain 1, cytoplasmic	DYNLL1	58.4	10.366	89	1.0019	11	0.98328	11
Q92945;A0A087WTP3;M0R0I5;M0QXW7;M0QYH3;C9JSZ1;Q96I24-2;M0R3J3;Q96I24	9;9;6;3;3;1;1;1;1	Far upstream element-binding protein 2	KHSRP	13.5	73.114	711	1.0018	11	1.0819	11
P35573;P35573-2;P35573-3	5;4;4	Glycogen debranching enzyme;4-alpha-glucanotransferase;Amylo-alpha-1,6-glucosidase	AGL	3.2	174.76	1532	1.0017	5	0.9216	5
Q9Y3E5;J3KQ48	5;5	Peptidyl-tRNA hydrolase 2, mitochondrial	PTRH2	44.7	19.193	179	1.0013	13	0.85755	13
P22087;M0R0P1;M0R299;M0QXL5;M0R2Q4;M0R2U2;M0R1H0;M0R2B0;A6NHQ2	7;6;6;6;6;4;4;4;1	rRNA 2-O-methyltransferase fibrillarin	FBL	25.2	33.784	321	1.0011	13	0.91284	13
Q06210-2;Q06210;O94808;E5RJP4	12;12;3;2	Glutamine--fructose-6-phosphate aminotransferase [isomerizing] 1	GFPT1	21.1	76.758	681	1.0002	12	1.051	12
Q9UBQ0;Q9UBQ0-2;F8VXU5	3;3;3	Vacuolar protein sorting-associated protein 29	VPS29	17	20.505	182	1.0001	3	1.1413	3
Q15393;Q15393-2;Q15393-3;J3QL37;J3QRB2;I3L4G7	17;7;6;3;2;2	Splicing factor 3B subunit 3	SF3B3	16.3	135.58	1217	0.9995	32	0.85086	32
O94979-6;O94979-3;O94979-10;O94979-4;O94979-9;O94979-2;O94979;O94979-8;D6REX3;D6RHZ5;O94979-7;H7BXG7;O94979-5;D6RE64;D6RCQ9;H0Y9T9;D6RBT0;D6RHE8;H0YAF5;H0Y8W8	12;12;12;12;12;12;12;12;12;11;9;9;7;2;2;2;1;1;1;1	Protein transport protein Sec31A	SEC31A	12.2	117.67	1067	0.99944	20	1.0919	20
Q5T7C4;P09429;B2RPK0;P23497	9;9;5;1	High mobility group protein B1;Putative high mobility group protein B1-like 1	HMGB1;HMGB1P1	47.5	18.311	158	0.99935	10	1.0501	10
Q8N1G4	6	Leucine-rich repeat-containing protein 47	LRRC47	12.5	63.472	583	0.9992	5	1.0347	5
Q9NZI8;Q9NZI8-2	21;14	Insulin-like growth factor 2 mRNA-binding protein 1	IGF2BP1	44	63.48	577	0.99904	38	0.75811	38
J3KP15;Q01130;J3QL05;Q01130-2;Q9BRL6-2;Q9BRL6	6;6;5;5;2;2	Serine/arginine-rich splicing factor 2	SRSF2	50.4	15.371	133	0.99877	21	0.93609	21
P68363;P68363-2;F8VVB9;F8VQQ4;F8VRZ4;F8VS66;F8VX09;F8VWV9;F8VRK0;F8VXZ7;F8W0F6	20;15;11;9;5;5;4;4;2;1;1	Tubulin alpha-1B chain	TUBA1B	53.7	50.151	451	0.99866	95	1.0434	95
P49588;P49588-2;H3BPK7	22;21;8	Alanine--tRNA ligase, cytoplasmic	AARS	27.3	106.81	968	0.99859	36	1.0497	36
P12956;B1AHC9;P12956-2	27;26;23	X-ray repair cross-complementing protein 6	XRCC6	47.1	69.842	609	0.99848	35	1.0186	35
P61158;B4DXW1;F8WEW2;F8WE84;F8WDR7;Q9P1U1-2;Q9P1U1	4;3;1;1;1;1;1	Actin-related protein 3	ACTR3	13.2	47.371	418	0.99845	3	1.0442	3
P49755;G3V2K7	2;1	Transmembrane emp24 domain-containing protein 10	TMED10	9.1	24.976	219	0.99798	3	1.0667	3
P51532-5;P51532-2;P51532-3;P51532-4;P51532;Q9HBD4;A0A0A0MT49;P51531-2;P51531;K7EP28;F6XE55;A0A0A0MSS5;F6UH26;B1ALG1;F6T8Q0;B1ALG2;F6XG14;B1ALF6;F6VDE0	15;15;15;15;15;15;15;6;6;3;1;1;1;1;1;1;1;1;1	Transcription activator BRG1	SMARCA4	10.8	181.26	1613	0.99782	25	0.99604	25
P46940;H0YLE8;A0A0J9YXZ5;A0A087WWP1;F2Z2E2;Q86VI3	19;15;13;1;1;1	Ras GTPase-activating-like protein IQGAP1	IQGAP1	12.5	189.25	1657	0.99748	25	1.0136	25
Q58FF8	8	Putative heat shock protein HSP 90-beta 2	HSP90AB2P	18.4	44.348	381	0.99747	3	1.0147	3
Q99584	4	Protein S100-A13	S100A13	29.6	11.471	98	0.99732	4	1.0512	4
Q9BWF3-3;E9PLB0;E9PM61;D6R9K7;U3KQD5;J3QRR5;Q9BWF3-4;Q9BWF3-2;E9PB51;Q9BQ04;Q9BWF3	3;3;3;3;3;3;3;3;3;3;3	RNA-binding protein 4;RNA-binding protein 4B	RBM4;RBM4B	17.5	16.173	143	0.9973	3	0.78503	3
P61221;D6R9I9;D6RGF4;H0Y990	15;12;6;3	ATP-binding cassette sub-family E member 1	ABCE1	29.5	67.314	599	0.99728	12	1.0234	12
Q9BUQ8;H0YI52	13;2	Probable ATP-dependent RNA helicase DDX23	DDX23	17.1	95.581	820	0.99679	12	1.0152	12
Q3ZCQ8;Q3ZCQ8-2;M0R0C3;M0R2F8;Q3ZCQ8-3;M0R047;M0R003	4;4;3;3;3;1;1	Mitochondrial import inner membrane translocase subunit TIM50	TIMM50	15.3	39.646	353	0.99677	3	1.1239	3
Q9H1Z9;A0A087X235;A0A087WWT4	1;1;1	Tetraspanin-10	TSPAN10	2.3	36.498	355	0.99656	3	0.79188	3
P61224-2;P61224-3;P61224;P61224-4;E7ESV4;A0A0J9YXB3;F5H7Y6;A6NIZ1;P62834;F5H4H0;F5GYH7;F5H077;F5GWU8;F5H491;F5H0B7;F5H500;F5H823;B7ZB78;F5GZG1;F5H6R7;F5H004;A0A075B6Q0;F5GYB5;F5GX62;F8WBC0	4;4;4;3;3;3;3;3;3;2;2;2;2;2;2;2;2;2;2;2;2;2;2;2;1	Ras-related protein Rap-1b;Ras-related protein Rap-1b-like protein;Ras-related protein Rap-1A	RAP1B;RAP1A	33.6	15.356	137	0.99645	6	1.1005	6
Q9BSJ8;Q9BSJ8-2;F8VZB1	12;12;4	Extended synaptotagmin-1	ESYT1	14.3	122.85	1104	0.99632	20	1.0793	20
F5H702;Q96GC5-3;Q96GC5;F5H8D0	6;6;6;3	39S ribosomal protein L48, mitochondrial	MRPL48	49.6	12.77	113	0.99609	7	0.95343	7
P68366-2;P68366;C9JDS9;C9JEV8;C9JQ00;C9JJQ8;C9JDL2;C9K0S6;Q9H853	19;19;7;6;6;6;4;2;2	Tubulin alpha-4A chain	TUBA4A	51	48.328	433	0.9957	3	1.1128	3
B4DIH5;P61201;P61201-2;H0YKU5;H0YMC2;H0YM03	6;6;6;2;1;1	COP9 signalosome complex subunit 2	COPS2	19	44.228	379	0.9956	5	1.0725	5
P67870;Q5SRQ6;Q5SRQ3;N0E472;A0A0G2JM12;N0E644;A0A0G2JM58	4;4;3;3;3;2;2	Casein kinase II subunit beta	CSNK2B;CSNK2B-LY6G5B-1181;CSNK2B-LY6G5B--991;CSNK2B-LY6G5B-562	23.3	24.942	215	0.99534	8	0.94011	8
O75821;K7EP16;K7ER90;K7EL20;K7ENA8	7;5;5;5;4	Eukaryotic translation initiation factor 3 subunit G	EIF3G	19.7	35.611	320	0.99504	11	0.91871	11
O95486;O95486-2	8;3	Protein transport protein Sec24A	SEC24A	8.7	119.75	1093	0.99455	10	0.9773	10
P04406;P04406-2;E7EUT5;O14556	14;13;11;1	Glyceraldehyde-3-phosphate dehydrogenase	GAPDH	49.6	36.053	335	0.99399	39	1.0375	39
P35232;C9JW96;C9JZ20;E7ESE2;E9PCW0;P35232-2;D6RBK0	9;7;5;5;5;4;3	Prohibitin	PHB	42.6	29.804	272	0.99339	8	1.0345	8
Q9NUQ6;Q9NUQ6-4;Q9NUQ6-3;A0A0A0MSG5;B8ZZZ7	9;8;8;7;7	SPATS2-like protein	SPATS2L	23.3	61.728	558	0.99318	17	0.90469	17
Q13813;Q13813-2;A0A0D9SGF6	95;94;94	Spectrin alpha chain, non-erythrocytic 1	SPTAN1	43.4	284.54	2472	0.99314	162	0.94489	162
P06576;H0YH81;F8W079;F8W0P7;H0YI37	17;14;10;5;3	ATP synthase subunit beta, mitochondrial;ATP synthase subunit beta	ATP5B	40.3	56.559	529	0.99284	28	0.9918	28
Q9UQE7	6	Structural maintenance of chromosomes protein 3	SMC3	5.3	141.54	1217	0.99271	5	1.0588	5
P13073;H3BPG0;H3BN72;H3BNV9;Q86WV2;H3BNI5	6;4;4;4;3;1	Cytochrome c oxidase subunit 4 isoform 1, mitochondrial	COX4I1	38.5	19.576	169	0.9927	7	1.0822	7
P26639;P26639-2;A2RTX5-2;B7ZLP8;A2RTX5;D6RCA5;D6R9F8;D6RDJ6	14;14;2;2;2;1;1;1	Threonine--tRNA ligase, cytoplasmic	TARS	21	83.434	723	0.99259	21	1.0149	21
D6REM4;P48729-3;P48729;U3KPX3;H0Y9X2;U3KQK7;E7ETM0;Q8N752;P48729-2	2;2;2;1;1;1;1;1;1	Casein kinase I isoform alpha;Casein kinase I isoform alpha-like	CSNK1A1;CSNK1A1L	8.1	27.741	236	0.99232	2	1.0819	2
P52758;H0YBX3;H0YB34	2;1;1	Ribonuclease UK114	HRSP12	19.7	14.494	137	0.99117	3	1.2156	3
Q71UI9-2;C9J0D1;Q71UI9;P0C0S5;C9J386;Q71UI9-3;Q71UI9-4	3;3;3;3;2;2;2	Histone H2A.V;Histone H2A;Histone H2A.Z	H2AFV;H2AFZ	22.8	12.146	114	0.99114	2	0.93195	2
P38646;D6RJI2;D6RA73;H0Y8S0;H0YBG6	28;5;3;3;2	Stress-70 protein, mitochondrial	HSPA9	47.4	73.68	679	0.99102	43	1.0121	43
Q9BS26	3	Endoplasmic reticulum resident protein 44	ERP44	6.7	46.971	406	0.99077	2	1.4957	2
P68371;Q3ZCM7;M0R2D3;M0QY85;M0QZL7;M0R0X0;M0QY37;M0QX14;M0R2T4;A0A075B724	18;7;4;3;3;2;2;2;1;1	Tubulin beta-4B chain	TUBB4B	55.1	49.83	445	0.99038	16	1.0485	16
P24666;G5E9R5;P24666-4;F2Z2Q9;P24666-3;P24666-2;D3YTI2	4;3;3;2;2;2;1	Low molecular weight phosphotyrosine protein phosphatase	ACP1	26.6	18.042	158	0.99013	3	1.2103	3
O00299	9	Chloride intracellular channel protein 1	CLIC1	45.6	26.922	241	0.98944	10	1.0091	10
P07237;H7BZ94;I3L398;H0Y3Z3;I3L312;I3NI03;I3L3U6;I3L4M2;I3L0S0;I3L514;I3L3P5;I3L1Y5	21;20;10;10;9;8;7;6;5;4;3;2	Protein disulfide-isomerase	P4HB	39.6	57.116	508	0.98937	49	1.0258	49
P23528;G3V1A4;E9PK25;E9PP50;E9PLJ3;E9PS23;E9PQB7;Q9Y281-3;Q9Y281	12;11;11;10;7;7;7;1;1	Cofilin-1	CFL1	59.6	18.502	166	0.98904	23	1.0417	23
P63104;E7EX29;B0AZS6;B7Z2E6;H0YB80;E7ESK7;P63104-2;E9PD24;E7EVZ2;E5RGE1;E5RIR4	10;9;7;5;5;5;5;4;4;3;3	14-3-3 protein zeta/delta	YWHAZ	44.9	27.745	245	0.98882	15	1.0348	15
Q13247-3;Q13247;Q13247-2	7;7;3	Serine/arginine-rich splicing factor 6	SRSF6	18.8	38.418	335	0.98804	21	0.99744	21
P17858;P17858-2	3;3	6-phosphofructokinase, liver type	PFKL	4.6	85.018	780	0.9876	3	1.0577	3
P82663;E7EPW2;P82663-3;P82663-2	3;2;2;2	28S ribosomal protein S25, mitochondrial	MRPS25	22	20.116	173	0.98753	5	0.89249	5
Q15691	4	Microtubule-associated protein RP/EB family member 1	MAPRE1	19.4	29.999	268	0.98733	6	1.0495	6
P13674-2;P13674;P13674-3	11;11;10	Prolyl 4-hydroxylase subunit alpha-1	P4HA1	24.7	60.966	534	0.9869	16	0.89927	16
P23368;P23368-2	2;1	NAD-dependent malic enzyme, mitochondrial	ME2	4.3	65.443	584	0.98664	3	0.77678	3
P30041	9	Peroxiredoxin-6	PRDX6	44.6	25.035	224	0.98649	12	1.049	12
C9JTY3;C9JUE0;C9JJP5;Q92734-4;Q92734-3;Q05BK6;Q92734-2;Q92734	3;3;3;3;3;3;3;3	Protein TFG	TFG	14.8	14.759	128	0.98644	7	1.1093	7
Q7Z4S6-6;Q7Z4S6-3;Q7Z4S6-5;Q7Z4S6-2;Q7Z4S6;Q7Z4S6-4;H0YIM7;H0YHT2	3;3;3;3;3;3;1;1	Kinesin-like protein KIF21A	KIF21A	2.3	180.74	1621	0.9861	3	0.54094	2
P17066;P48741	8;5	Heat shock 70 kDa protein 6;Putative heat shock 70 kDa protein 7	HSPA6;HSPA7	13.1	71.027	643	0.98572	5	0.99102	5
P06744;P06744-2;A0A0A0MTS2;K7EQ48;A0A0J9YXP8;A0A0J9YX90;A0A0J9YYH3;K7EPY4;K7EP41;K7ELR7;K7ENA0;CON__Q3ZBD7;K7ERK8;K7ERC6;K7EIL4;Q8N196	12;12;12;11;9;9;9;5;4;3;3;3;2;2;1;1	Glucose-6-phosphate isomerase	GPI	24.2	63.146	558	0.98475	25	0.98961	25
Q15291-2;Q15291	2;2	Retinoblastoma-binding protein 5	RBBP5	4	55.071	500	0.98452	2	0.99846	2
O43776;K7EQ35;K7EMQ6;K7EIU7;K7EPK2;O43776-2;K7EJ19	11;3;2;2;2;2;1	Asparagine--tRNA ligase, cytoplasmic	NARS	22.3	62.942	548	0.98445	8	1.0435	8
Q8WTS6;D6RJA0	2;1	Histone-lysine N-methyltransferase SETD7	SETD7	6.3	40.72	366	0.98426	2	0.92523	2
P04075;J3KPS3;P04075-2;H3BQN4;H3BPS8;H3BUH7;H3BR04;H3BMQ8;H3BR68;H3BU78;A0A087WXX2;P05062	22;21;21;20;14;11;11;10;7;7;1;1	Fructose-bisphosphate aldolase A;Fructose-bisphosphate aldolase	ALDOA	68.4	39.42	364	0.98421	58	1.0749	58
P18206-2;P18206;Q5JQ13;P18206-3	26;26;19;5	Vinculin	VCL	27.9	116.72	1066	0.98374	35	1.0426	35
O43852-5;O43852;O43852-3;O43852-13;O43852-14;O43852-9;O43852-11;O43852-10;O43852-6;O43852-2;O43852-4;H0Y875;O43852-15;O43852-12;O43852-7;O43852-8	5;5;5;3;3;3;3;3;3;3;3;2;2;1;1;1	Calumenin	CALU	32.3	26.891	229	0.98353	6	1.1714	6
P62937;F8WE65;C9J5S7;Q9Y536;P0DN26;F5H284;A0A0H2UH34;A0A0B4J2A2;A0A075B767;A0A075B759	11;6;6;2;2;2;2;2;2;2	Peptidyl-prolyl cis-trans isomerase A;Peptidyl-prolyl cis-trans isomerase A, N-terminally processed;Peptidyl-prolyl cis-trans isomerase	PPIA	60	18.012	165	0.98346	24	1.0557	24
P22234;E9PBS1;P22234-2;D6RF62	8;7;7;5	Multifunctional protein ADE2;Phosphoribosylaminoimidazole-succinocarboxamide synthase;Phosphoribosylaminoimidazole carboxylase	PAICS	20.7	47.079	425	0.9833	5	0.99732	5
Q6P161	1	39S ribosomal protein L54, mitochondrial	MRPL54	7.2	15.819	138	0.98265	2	0.99302	2
P29144;Q5VZU9	13;13	Tripeptidyl-peptidase 2	TPP2	12.4	138.35	1249	0.98179	11	0.86679	11
Q8WVM8-2;Q8WVM8-3;Q8WVM8;H0YJY1	3;3;3;1	Sec1 family domain-containing protein 1	SCFD1	7.6	62.259	550	0.98137	3	1.1311	3
Q9UBQ5-2;Q9UBQ5;K7EQM4;A0A087WVB9;B4DQ48;K7EK53;K7ES31;K7ERF1	4;4;3;3;2;2;2;2	Eukaryotic translation initiation factor 3 subunit K	EIF3K	26.5	24.484	211	0.98105	4	1.1168	4
Q9UMS4;F5GY56;F5H2I0;H0YGF3	8;4;2;1	Pre-mRNA-processing factor 19	PRPF19	24.6	55.18	504	0.98087	15	0.94279	15
Q9H9J2	2	39S ribosomal protein L44, mitochondrial	MRPL44	8.4	37.535	332	0.98083	2	0.8504	2
Q9BQE3;F5H5D3	20;20	Tubulin alpha-1C chain	TUBA1C	53.5	49.895	449	0.98064	6	1.065	6
P31939;P31939-2;H7C1S2;C9JLK0;F8WEF0	16;15;6;4;3	Bifunctional purine biosynthesis protein PURH;Phosphoribosylaminoimidazolecarboxamide formyltransferase;IMP cyclohydrolase	ATIC	30.7	64.615	592	0.97978	13	1.1247	13
P35613-3;A0A087WUV8;P35613-4;A0A087X2B5;P35613-2;P35613;R4GN83;R4GMX5;I3L192	2;2;2;2;2;2;1;1;1	Basigin	BSG	13.6	19.438	176	0.97965	3	1.05	3
O43143	19	Putative pre-mRNA-splicing factor ATP-dependent RNA helicase DHX15	DHX15	26.7	90.932	795	0.97934	32	0.8626	32
Q5JP53;P07437;Q5ST81	18;18;16	Tubulin beta chain	TUBB	57.5	47.766	426	0.97924	99	1.0557	99
O75822-2;O75822-3;O75822;H0YGJ7;H0YLP3	4;4;4;1;1	Eukaryotic translation initiation factor 3 subunit J	EIF3J	17.6	22.941	204	0.97924	5	0.99063	5
O43172-2;O43172	10;10	U4/U6 small nuclear ribonucleoprotein Prp4	PRPF4	23.8	58.32	521	0.97909	17	0.87996	17
Q9UJA5;Q9UJA5-4;Q9UJA5-2;Q9UJA5-3	4;3;3;2	tRNA (adenine(58)-N(1))-methyltransferase non-catalytic subunit TRM6	TRMT6	7.4	55.799	497	0.97877	4	0.8207	4
A0A087WYK8;O43847;O43847-2;B1AKJ5;G3V1R5;F5H7V1;H0Y5G9	17;17;17;17;16;13;8	Nardilysin	NRD1	16	131.14	1148	0.97861	18	1.0002	18
O94776;O94776-2;F8VSM3;E9PCS8;Q13330-2;H0Y4T7;E7EQY4;Q9BTC8-2;D6W5A2;E7EV10;Q9BTC8;Q13330-3;E7ESY4;Q13330	5;3;1;1;1;1;1;1;1;1;1;1;1;1	Metastasis-associated protein MTA2	MTA2	7.5	75.022	668	0.97836	4	0.96915	4
Q9H2W6;A0A087WT90	2;1	39S ribosomal protein L46, mitochondrial	MRPL46	8.2	31.705	279	0.97823	2	1.2088	2
P68402;P68402-3;P68402-2;J3KNE3;P68402-4	2;1;1;1;1	Platelet-activating factor acetylhydrolase IB subunit beta	PAFAH1B2	12.2	25.569	229	0.97797	2	1.0405	2
Q9NSD9;Q9NSD9-2	7;5	Phenylalanine--tRNA ligase beta subunit	FARSB	12.6	66.115	589	0.97792	7	1.198	7
O00151	3	PDZ and LIM domain protein 1	PDLIM1	9.4	36.071	329	0.97762	5	1.0405	5
P55786-2;E9PLK3;P55786;E9PJF9;E9PJY4;E9PPD4;A6NEC2-3;H0YDG0;E9PPZ2;E9PP11;A6NEC2	4;4;4;1;1;1;1;1;1;1;1	Puromycin-sensitive aminopeptidase	NPEPPS	5	94.515	839	0.97755	4	1.073	4
Q14566	21	DNA replication licensing factor MCM6	MCM6	28.5	92.888	821	0.97733	20	0.99094	20
O00203-3;O00203;Q13367;Q13367-4;Q13367-3;H0YBD0;F5GWU4;F5GYB0	28;28;5;5;4;3;2;1	AP-3 complex subunit beta-1	AP3B1	28.7	116.19	1045	0.97721	50	0.93412	50
P53999;D6RC37;D6R970	6;1;1	Activated RNA polymerase II transcriptional coactivator p15	SUB1	44.9	14.395	127	0.9771	16	0.93099	16
C9JBI3;P78330	4;4	Phosphoserine phosphatase	PSPH	24.6	20.745	187	0.97669	5	1.013	5
O60493;O60493-3;O60493-4;O60493-2;Q9UMY4-2;Q9UMY4;A0A087X0R6	3;2;2;1;1;1;1	Sorting nexin-3	SNX3	14.8	18.762	162	0.97625	3	1.1511	3
P25205;P25205-2;J3KQ69	8;8;7	DNA replication licensing factor MCM3	MCM3	11	90.98	808	0.97606	9	1.0797	9
Q14152;Q14152-2	40;37	Eukaryotic translation initiation factor 3 subunit A	EIF3A	28.7	166.57	1382	0.97597	82	0.97783	83
F5H6T1;P61160;P61160-2	1;1;1	Actin-related protein 2	ACTR2	4.1	38.841	339	0.97573	2	0.81975	2
F8VR50;C9JZD1;O15145	2;2;2	Actin-related protein 2/3 complex subunit 3	ARPC3	28.6	9.7261	84	0.97516	2	1.0179	2
Q9UMX0-2;Q9UMX0;Q9UMX0-4;H0YDS0;Q9UMX0-3;Q9NRR5;Q9UHD9	3;3;2;1;1;1;1	Ubiquilin-1	UBQLN1	8.2	59.219	561	0.97492	2	1.201	2
F8WBN3;B9A031;P84101-4;P84101;C9JQZ0;B8ZZY7;F8WBV6;P84101-3;P84101-2	2;2;2;2;2;2;2;2;2	Small EDRK-rich factor 2	SERF2	25	4.5792	40	0.9749	2	1.0589	2
O75607	3	Nucleoplasmin-3	NPM3	23.6	19.343	178	0.97464	5	1.0204	5
A0A087X054;Q9Y4L1;E9PJ21;A0A087WWI4;K7EQK2;Q9Y4L1-2;J3QL06;J3KTF1;Q9BST8;J3QQH7;J3QLE9;A0A087X214;A0A087WW13;Q9BXT5	20;20;13;13;13;10;8;8;6;6;6;3;3;1	Hypoxia up-regulated protein 1	HYOU1	25.1	104.78	937	0.97461	23	1.0429	23
Q9GZT3-2;Q9GZT3;A0A087WUN7;H0YJ40;G3V4X6;G3V2S9;H0YJW7;H0YJ07;H0YJU7;H0YJI1	7;7;6;6;6;6;5;3;3;1	SRA stem-loop-interacting RNA-binding protein, mitochondrial	SLIRP	57.9	12.122	107	0.97424	9	1.0851	9
P54577;A0A0C4DGZ5	9;8	Tyrosine--tRNA ligase, cytoplasmic;Tyrosine--tRNA ligase, cytoplasmic, N-terminally processed	YARS	15.7	59.143	528	0.97419	7	1.0225	7
P09972;K7EKH5;J3KSV6;J3QKP5;A8MVZ9;C9J8F3	6;3;3;3;3;2	Fructose-bisphosphate aldolase C;Fructose-bisphosphate aldolase	ALDOC	24.2	39.455	364	0.97398	4	1.0398	4
Q9BPW8;H7C2U6;F8WCR5;C9JDV8	4;3;2;1	Protein NipSnap homolog 1	NIPSNAP1	14.4	33.31	284	0.97397	4	1.0314	4
P62308;A8MWD9;Q49AN9;F5H013;C9JVQ0	3;3;2;2;2	Small nuclear ribonucleoprotein G;Small nuclear ribonucleoprotein G-like protein	SNRPG	34.2	8.496	76	0.97392	6	0.8766	6
P10809;E7ESH4;E7EXB4;P10809-2;C9JL25;C9J0S9;C9JL19;C9JCQ4	24;6;5;2;2;1;1;1	60 kDa heat shock protein, mitochondrial	HSPD1	48.5	61.054	573	0.97381	46	1.0694	46
P46821;D6RA32;D6RGJ3;D6RA40;D6RCL2	11;6;3;3;2	Microtubule-associated protein 1B;MAP1B heavy chain;MAP1 light chain LC1	MAP1B	5.1	270.63	2468	0.97373	9	1.0203	9
J3QRD1;P51648;P51648-2;J3QKK9;J3QS00;J3KTG1;I3L1M4;C9JGJ2;I3L0X1;K7EN73;E9PJV0;C9JKT2;C9JMC5;I3L3I9;P48448;A8MYB8;E9PNN6;P43353-2;P30838;P43353	7;7;7;3;3;3;3;3;3;2;1;1;1;1;1;1;1;1;1;1	Fatty aldehyde dehydrogenase	ALDH3A2	17.3	44.648	393	0.97314	6	0.99933	6
P12270;P12270-2;Q5SWX9	38;16;1	Nucleoprotein TPR	TPR	17.7	267.29	2363	0.97294	33	0.93386	33
A6NLN1;P26599;P26599-2;P26599-3;A0A0D9SF20;K7EKJ7;K7EK45;A0A087WUW5;K7ELW5;K7ES59;A0A087WU68;O95758-1;O95758-6;O95758-2;O95758;O95758-5;O95758-4;X6R242;O95758-7	10;10;10;10;4;4;4;3;3;3;2;2;2;2;2;2;2;1;1	Polypyrimidine tract-binding protein 1	PTBP1	26	56.51	527	0.97287	34	0.99041	34
P62136;P62136-2;E9PMD7;P62136-3;F5H1L6;F5H037	13;12;11;9;3;3	Serine/threonine-protein phosphatase PP1-alpha catalytic subunit;Serine/threonine-protein phosphatase	PPP1CA	46.7	37.512	330	0.97269	14	0.99129	14
F6T1Q0;Q6L8Q7-2;Q6L8Q7	4;4;4	2,5-phosphodiesterase 12	PDE12	9.7	52.175	472	0.97223	4	1.033	4
P13804;H0YL12;P13804-2;H0YKF0;H0YLU7;H0YK49;H0YNX6;J3KN60	6;5;5;5;5;4;4;1	Electron transfer flavoprotein subunit alpha, mitochondrial	ETFA	25.5	35.079	333	0.97219	6	1.0389	6
P82673;H0YG82;P82673-2	2;1;1	28S ribosomal protein S35, mitochondrial	MRPS35	7.1	36.844	323	0.97198	3	0.80333	3
Q9Y676;A0A0G2JIC6	3;1	28S ribosomal protein S18b, mitochondrial	MRPS18B	13.6	29.395	258	0.97168	3	0.84005	3
P04114;A0A087WTM7	3;2	Apolipoprotein B-100;Apolipoprotein B-48	APOB	0.6	515.6	4563	0.97137	4	0.96356	4
Q9NR30-2;Q9NR30;A0A087WVC1;Q9BQ39	21;21;2;2	Nucleolar RNA helicase 2	DDX21	35.8	79.656	715	0.97094	36	0.81501	35
B4DJV2;O75390;A0A0C4DGI3;H0YIC4	4;4;3;2	Citrate synthase;Citrate synthase, mitochondrial	CS	9.1	50.431	453	0.97064	3	1.0675	3
P53621;P53621-2	40;39	Coatomer subunit alpha;Xenin;Proxenin	COPA	35.2	138.34	1224	0.97062	43	1.0157	43
B1ANR0;Q13310-2;Q13310;Q13310-3;H0Y5F5;H0YEU6;B1ANR1;H0YCC8;H0YER0;H0Y6X6;P0CB38	13;13;13;13;10;5;4;3;1;1;1	Polyadenylate-binding protein 4	PABPC4	26.2	67.97	615	0.97044	9	0.91472	9
P55157;E9PBP6;A0A087WZS2;P55157-2;D6REL9	15;15;10;2;2	Microsomal triglyceride transfer protein large subunit	MTTP	20.9	99.35	894	0.97002	18	1.0717	18
Q96BP2;A6NJX6	2;1	Coiled-coil-helix-coiled-coil-helix domain-containing protein 1	CHCHD1	22.9	13.475	118	0.97	4	0.78023	4
P34932;A0A087WYC1;A0A087WTS8;P34932-2	15;12;10;3	Heat shock 70 kDa protein 4	HSPA4	23.2	94.33	840	0.96988	19	1.0672	19
Q9UDY2-5;Q9UDY2-4;Q9UDY2-2;Q9UDY2-6;Q9UDY2-3;Q9UDY2;Q9UDY2-7	3;3;3;3;3;3;3	Tight junction protein ZO-2	TJP2	3.3	111.66	993	0.96983	4	0.90422	4
Q16555-2;Q16555;E9PD68;Q14194;Q14194-2;E5RFU4;H0YBT4;Q14195;Q14195-2	11;11;2;2;2;1;1;1;1	Dihydropyrimidinase-related protein 2	DPYSL2	31.5	58.162	536	0.96956	12	1.1033	12
P11387;E5RIC7;Q969P6-2;Q969P6	17;2;2;2	DNA topoisomerase 1	TOP1	25.1	90.725	765	0.96942	23	0.80961	23
P05023-4;P05023;P05023-3;P05023-2;M0R116;P13637;P13637-2;P13637-3;A0A0A0MT26;B1AKY9;P50993;H0Y7C1;Q5TC01;Q13733;Q5TC02;M0QXF2;P20648;P54707;P54707-2;E9PRA5	19;19;18;13;7;7;7;7;7;6;6;4;3;3;2;2;2;2;2;1	Sodium/potassium-transporting ATPase subunit alpha-1	ATP1A1	22.4	113	1023	0.96937	24	1.0174	24
Q9UKE5-8;Q9UKE5-5;Q9UKE5-7;Q9UKE5-3;Q9UKE5-6;Q9UKE5-2;Q9UKE5-4;Q9UKE5	3;3;3;3;3;3;3;3	TRAF2 and NCK-interacting protein kinase	TNIK	2	144.25	1268	0.96912	3	1.0717	3
O95831-3;O95831;O95831-2;O95831-5;E9PMA0;O95831-6;O95831-4	7;7;5;4;4;2;2	Apoptosis-inducing factor 1, mitochondrial	AIFM1	13	66.294	609	0.96902	7	1.0597	7
P61088;F8VQQ8;F8VSD4;F8VV71;Q5JXB2;F8VZ29	5;3;3;3;3;2	Ubiquitin-conjugating enzyme E2 N;Putative ubiquitin-conjugating enzyme E2 N-like	UBE2N;UBE2NL	34.9	17.138	152	0.96895	7	0.99466	7
Q04828;A0A0A0MT30;H0Y804;A6NHU4;S4R3Z2;P42330;A0A0A0MSS8;P42330-2;P17516;S4R3D5	18;17;13;7;7;7;7;4;4;3	Aldo-keto reductase family 1 member C1	AKR1C1	72.1	36.788	323	0.96877	33	0.99343	33
P17844;J3KTA4;P17844-2;J3KRZ1;J3QRQ7;J3QSF1;J3QR02;J3KRX8;X6RLV5;J3QRN5	22;22;21;7;7;6;4;4;2;1	Probable ATP-dependent RNA helicase DDX5	DDX5	36.5	69.147	614	0.96831	37	0.87974	37
O43491-3;O43491-4;E9PHY5;O43491;I6L9B1;O43491-2;E9PII3;E9PK52;E9PQD2;E9PJP4;E9PQN0;E9PRG1;E9PIG0;J3QS55;Q6ZSX4;E9PN54;H0Y5B0;Q6R5J7	18;18;18;18;17;17;17;17;4;3;3;3;3;1;1;1;1;1	Band 4.1-like protein 2	EPB41L2	25.8	83.801	747	0.96793	41	0.92301	41
P12955-3;P12955;P12955-2;V9GYE4	5;5;4;1	Xaa-Pro dipeptidase	PEPD	14.7	47.261	429	0.96779	4	1.073	4
Q9NVP1;H7C452	9;4	ATP-dependent RNA helicase DDX18	DDX18	16.4	75.406	670	0.96775	8	0.79309	8
O60885;M0QZD9;O60885-2;O60885-3;Q15059-2;Q15059	3;2;2;2;1;1	Bromodomain-containing protein 4	BRD4	2.4	152.22	1362	0.96752	6	0.94104	6
P14625;Q96GW1;H0YIV0;Q58FF3;F8W026;F8VPC7	28;11;4;4;3;1	Endoplasmin	HSP90B1	33.1	92.468	803	0.96744	51	1.0484	51
P07108;P07108-3;B8ZWD1;P07108-2;P07108-4;A0A0A0MTI5;P07108-5;P07108-6	6;6;6;6;6;6;6;1	Acyl-CoA-binding protein	DBI	52.9	10.044	87	0.96728	9	1.0014	9
Q13405;H0YDP7;E9PNF1;E9PI78	5;3;2;1	39S ribosomal protein L49, mitochondrial	MRPL49	36.7	19.198	166	0.96722	6	0.8844	6
E7ETU9;O00469;O00469-2;C9JXZ0;O00469-3	9;9;9;4;4	Procollagen-lysine,2-oxoglutarate 5-dioxygenase 2	PLOD2	16.8	81.169	703	0.9672	9	1.0044	9
P35659;D6RDA2;P35659-2;B4DFG0;D6R9L5;H0Y8X0;H0Y993	7;6;6;6;3;3;1	Protein DEK	DEK	18.7	42.674	375	0.96705	7	1.0631	7
Q8TAT6;Q8TAT6-2;A0A0D9SFI9;I3L4U9	2;2;1;1	Nuclear protein localization protein 4 homolog	NPLOC4	4.6	68.119	608	0.96698	2	0.9498	2
O43747;O43747-2	4;4	AP-1 complex subunit gamma-1	AP1G1	5.2	91.35	822	0.96683	5	1.3054	5
Q12768;E7EQI7	2;1	WASH complex subunit strumpellin	KIAA0196	2	134.28	1159	0.9666	2	0.78322	2
Q5BJH1;P07602;P07602-2;P07602-3;C9JIZ6	2;2;2;2;2	Proactivator polypeptide;Saposin-A;Saposin-B-Val;Saposin-B;Saposin-C;Saposin-D	PSAP	8.3	26.308	240	0.96643	2	1.0005	2
Q01082;A0A087WUZ3;Q01082-3;Q01082-2;F8W6C1;P11277-3;P11277;P11277-2;E9PJZ2	99;99;92;92;29;5;5;5;1	Spectrin beta chain, non-erythrocytic 1	SPTBN1	50.2	274.61	2364	0.96632	115	0.91999	115
P14927;P14927-2;B7Z2R2	2;1;1	Cytochrome b-c1 complex subunit 7	UQCRB	20.7	13.53	111	0.96621	3	0.94458	3
P15170-2;P15170-3;H3BR35;P15170;Q8IYD1	6;6;5;5;5	Eukaryotic peptide chain release factor GTP-binding subunit ERF3A;Eukaryotic peptide chain release factor GTP-binding subunit ERF3B	GSPT1;GSPT2	9.7	68.6	636	0.96584	5	0.97818	5
P62699	2	Protein yippee-like 5	YPEL5	18.2	13.841	121	0.96583	2	0.88729	2
P00367;P00367-3;P00367-2;P49448	11;9;8;8	Glutamate dehydrogenase 1, mitochondrial;Glutamate dehydrogenase 2, mitochondrial	GLUD1;GLUD2	22.9	61.397	558	0.9657	17	1.0542	17
Q9UNZ2;Q9UNZ2-5;F2Z2K0;Q9UNZ2-4;Q9UNZ2-6;R4GNE6	4;4;3;3;2;1	NSFL1 cofactor p47	NSFL1C	13.8	40.572	370	0.96565	6	1.0715	6
O00429-7;O00429-4;O00429-5;O00429-3;G8JLD5;O00429-2;O00429;O00429-8;O00429-6	3;3;3;3;3;3;3;3;3	Dynamin-1-like protein	DNM1L	5.8	60.008	533	0.96528	3	0.87432	3
P07339;F8WD96;C9JH19;F8W787;H7C1V0;H7C469	4;3;3;2;1;1	Cathepsin D;Cathepsin D light chain;Cathepsin D heavy chain	CTSD	10.2	44.552	412	0.9651	4	1.0535	4
P14618;P14618-3;P14618-2;B4DNK4;H3BTN5;H3BR70;H3BQ34;H3BUW1;H3BTJ2;H3BT25;H3BU13;H3BN34;H3BQZ3;P30613-2;P30613	33;30;29;27;24;17;16;10;10;9;2;1;1;1;1	Pyruvate kinase PKM;Pyruvate kinase	PKM	68	57.936	531	0.9649	95	1.0525	95
P49411;H3BNU3	27;1	Elongation factor Tu, mitochondrial	TUFM	64.4	49.541	452	0.96458	81	0.83362	81
Q8TBX8-3;Q8TBX8;Q8TBX8-2;H0YIJ6;F8VNT5;F8VU68	5;5;3;2;2;2	Phosphatidylinositol 5-phosphate 4-kinase type-2 gamma	PIP4K2C	15.1	45.053	403	0.96418	5	0.99837	5
P60174-1;P60174;P60174-4;U3KPZ0;U3KQF3;U3KPS5	14;14;9;6;5;3	Triosephosphate isomerase	TPI1	75.9	26.669	249	0.96341	24	1.0054	24
P62979;J3QS39;J3QTR3;F5H6Q2;P62987;F5GYU3;F5H2Z3;F5H265;B4DV12;F5H388;F5H747;F5GXK7;J3QKN0;Q5PY61;P0CG47;Q96C32;P0CG48;M0R1V7;M0R1M6;M0R2S1;J3QSA3;F5GZ39	7;5;5;5;5;5;5;5;5;5;5;5;5;5;5;5;5;4;4;4;3;3	Ubiquitin-40S ribosomal protein S27a;Ubiquitin;40S ribosomal protein S27a;Ubiquitin-60S ribosomal protein L40;Ubiquitin;60S ribosomal protein L40;Polyubiquitin-B;Ubiquitin;Polyubiquitin-C;Ubiquitin	RPS27A;UBB;UBC;UBA52	50.6	17.965	156	0.96334	40	0.92159	40
P40926;P40926-2;G3XAL0	11;9;7	Malate dehydrogenase, mitochondrial;Malate dehydrogenase	MDH2	45	35.503	338	0.96291	12	0.98962	12
Q92878-3;Q92878;Q92878-2;E7EN38;H7C0P8;E7ESD9	3;3;3;2;1;1	DNA repair protein RAD50	RAD50	3.4	138.43	1173	0.96281	3	0.96164	3
P27824;P27824-2;P27824-3;D6RGY2;H0Y9Q7;D6RFL1;D6RB85;D6RDP7;H0Y9H1;D6RAQ8;D6RAU8;D6RHJ3;D6RD16	16;16;13;8;5;4;4;4;4;3;3;1;1	Calnexin	CANX	26.7	67.567	592	0.96266	26	1.0778	26
P13010;C9JZ81	17;1	X-ray repair cross-complementing protein 5	XRCC5	24.7	82.704	732	0.96255	30	1.0068	30
P35637-2;P35637;H3BPE7;A0A075B7D9;Q92804-2;Q92804	2;2;2;1;1;1	RNA-binding protein FUS;TATA-binding protein-associated factor 2N	FUS;TAF15	4.8	53.354	525	0.96254	5	1.0186	5
Q14011;K7ENX8;K7ELV6;K7EJV5;K7ELT6;K7EJV1;K7EMY9;K7EPM4;K7ER40;K7EQR7;Q14011-2;D6W5Y5	3;2;2;2;2;2;2;2;2;2;2;2	Cold-inducible RNA-binding protein	CIRBP	20.9	18.648	172	0.96225	2	1.1696	2
P61978-3;P61978;P61978-2;Q5T6W2;S4R359;S4R457	14;14;14;11;3;1	Heterogeneous nuclear ribonucleoprotein K	HNRNPK	41.4	48.562	440	0.96184	43	1.0444	43
Q9NPJ3-2;Q9NPJ3	2;2	Acyl-coenzyme A thioesterase 13	ACOT13	18.8	12.366	117	0.96125	2	1.0715	2
O15260-3;O15260-2;Q5T8U5;O15260	2;2;2;2	Surfeit locus protein 4	SURF4	16.4	14.854	128	0.96124	3	1.0691	3
C9IZK7;Q15061;C9JEE7	2;2;1	WD repeat-containing protein 43	WDR43	8	20.925	187	0.96104	2	0.95248	2
Q96BJ3	1	Axin interactor, dorsalization-associated protein	AIDA	2.6	35.023	306	0.96082	2	0.90446	2
O95059	1	Ribonuclease P protein subunit p14	RPP14	7.3	13.693	124	0.9607	2	0.9412	2
P09874	11	Poly [ADP-ribose] polymerase 1	PARP1	13.6	113.08	1014	0.96063	18	1.0715	18
P27695;G3V5Q1;G3V3M6;G3V5D9;A0A0C4DGK8;H7C4A8;G3V5M0;G3V359;G3V3C7	5;4;4;2;2;2;2;2;2	DNA-(apurinic or apyrimidinic site) lyase;DNA-(apurinic or apyrimidinic site) lyase, mitochondrial	APEX1	23	35.554	318	0.9605	4	1.0363	4
Q09028-3;Q09028;Q09028-4;Q09028-2;E9PNS2;E9PIC4;C9JPP3;E9PNS6	6;6;5;5;1;1;1;1	Histone-binding protein RBBP4	RBBP4	17.3	46.158	410	0.96033	6	1.0397	6
A0A0B4J220;E9PLD3;E9PRG8	2;1;1		C11orf48	21.1	14.234	123	0.96023	4	1.1202	4
P13489;E9PMJ3;E9PLZ3;E9PIM9;E9PMA9;E9PMN0;E9PIK5;H0YCR7;E9PR82;E9PMI1	8;4;4;4;3;3;3;3;1;1	Ribonuclease inhibitor	RNH1	21.5	49.973	461	0.95994	7	1.0624	7
P60228;E5RGA2;E5RHS5;H0YBR5;H0YAW4;E5RIT4;E5RIP5;E5RJ25;E5RII3;H0YBP5	14;10;7;5;4;3;2;2;2;1	Eukaryotic translation initiation factor 3 subunit E	EIF3E	34.8	52.22	445	0.9599	19	0.98795	19
O14776-2;O14776;G3V220	4;4;3	Transcription elongation regulator 1	TCERG1	3.8	121.69	1077	0.95956	4	1.1064	4
Q00839;Q00839-2;Q5RI18	24;22;6	Heterogeneous nuclear ribonucleoprotein U	HNRNPU	29.3	90.583	825	0.95946	104	0.97204	104
Q5JTH9-2;Q5JTH9-3;Q5JTH9	3;3;3	RRP12-like protein	RRP12	2.7	132.71	1197	0.95941	2	1.0276	2
K7ELW0;Q99497;K7EN27	6;6;4	Protein DJ-1	PARK7	27.2	17.91	169	0.95921	8	0.97563	8
O60218	19	Aldo-keto reductase family 1 member B10	AKR1B10	69.6	36.019	316	0.95884	33	1.0118	33
Q8WVC0;Q8WVC0-2	6;5	RNA polymerase-associated protein LEO1	LEO1	10.4	75.403	666	0.95854	9	0.84816	9
A0A087WUA5;Q9H223;C9JDQ8;C9J2Z4;C9JC03;Q9H4M9;Q9NZN3;A0A0C4DH83;A0A024R571	2;2;1;1;1;1;1;1;1	EH domain-containing protein 4;EH domain-containing protein 1;EH domain-containing protein 3	EHD4;EHD1;EHD3	3.3	61.113	540	0.95847	2	0.98414	2
P11177-3;P11177-2;P11177;F8WF02;C9J634	6;6;6;3;3	Pyruvate dehydrogenase E1 component subunit beta, mitochondrial	PDHB	20.2	37.514	341	0.95806	6	0.99564	6
O00479	2	High mobility group nucleosome-binding domain-containing protein 4	HMGN4	20	9.5388	90	0.95801	2	1.0482	2
Q9UHY1;F8W6G1	2;2	Nuclear receptor-binding protein	NRBP1	4.9	59.844	535	0.95752	2	1.1146	2
O75533;H7C341;O75533-2;B4DGZ4;F8WC19	24;4;2;2;1	Splicing factor 3B subunit 1	SF3B1	21.9	145.83	1304	0.95727	27	0.87723	27
P33991;E5RG31;E5RFJ8	14;5;1	DNA replication licensing factor MCM4	MCM4	20	96.557	863	0.95716	12	0.96321	12
P30040;F8VY02;P30040-2;F8W1G0	7;5;1;1	Endoplasmic reticulum resident protein 29	ERP29	28.4	28.993	261	0.95713	7	0.99525	7
Q9Y4B6-3;Q9Y4B6-2;Q9Y4B6	4;4;4	Protein VPRBP	VPRBP	4.3	118.23	1058	0.95706	3	0.76925	3
P62495-2;B7Z7P8;P62495;I3L492;D6RCB3;D6RJE8	4;4;4;2;1;1	Eukaryotic peptide chain release factor subunit 1	ETF1	10.1	45.462	404	0.95686	3	1.0319	3
P14174	2	Macrophage migration inhibitory factor	MIF	17.4	12.476	115	0.95621	7	1.054	7
P38919;I3L3H2	7;3	Eukaryotic initiation factor 4A-III;Eukaryotic initiation factor 4A-III, N-terminally processed	EIF4A3	19.7	46.871	411	0.95609	6	0.92161	6
P31040-2;P31040;P31040-3;A0A087X1I3;D6RFM5;H0Y8X1	3;3;2;2;2;1	Succinate dehydrogenase [ubiquinone] flavoprotein subunit, mitochondrial	SDHA	5.8	67.299	616	0.95607	3	1.0533	3
P09936;D6RE83;D6R956;D6R974;D6RF53	8;7;7;6;1	Ubiquitin carboxyl-terminal hydrolase isozyme L1	UCHL1	46.6	24.824	223	0.95546	16	1.0454	16
P49736;H0Y8E6	9;8	DNA replication licensing factor MCM2	MCM2	11.7	101.89	904	0.9554	13	0.96566	13
P50454;E9PQ34;E9PJH8;E9PIG2;E9PRS3;E9PNX1;E9PK86;E9PMI5;E9PR70;E9PPV6;E9PKH2	3;2;2;2;2;2;2;2;2;2;1	Serpin H1	SERPINH1	9.3	46.44	418	0.95529	4	0.96231	4
Q6P1J9	2	Parafibromin	CDC73	4	60.576	531	0.95521	3	0.91618	3
O43719;Q5H919;Q5H918	2;1;1	HIV Tat-specific factor 1	HTATSF1	2.8	85.852	755	0.95503	3	1.0191	3
F5H1S9;G8JLB3;Q9Y606-2;Q9Y606;F5GY32;F5GXL3;F5H168;F8W9U5;F5H1B2	7;7;7;7;2;2;1;1;1	tRNA pseudouridine synthase;tRNA pseudouridine synthase A, mitochondrial	PUS1	20.3	41.729	374	0.95489	11	0.95077	11
P54709;C9J6S2;C9JXZ1;C9JA36;P54709-2	2;1;1;1;1	Sodium/potassium-transporting ATPase subunit beta-3	ATP1B3	8.6	31.512	279	0.95487	3	1.15	3
P28288;P28288-2	5;3	ATP-binding cassette sub-family D member 3	ABCD3	7.3	75.475	659	0.95487	5	0.98912	5
J3QLE5;P14678-2;P63162;P14678;P63162-2;A8MT02;P14678-3;J3KRY3;S4R3P3	8;8;8;8;8;8;8;5;5	Small nuclear ribonucleoprotein-associated proteins B and B;Small nuclear ribonucleoprotein-associated protein N	SNRPN;SNRPB	35.5	17.546	169	0.95475	16	0.92846	16
P35580;P35580-5;P35580-2;P35580-3;P35580-4	15;15;15;15;15	Myosin-10	MYH10	7.2	229	1976	0.95456	5	0.93126	5
P23526;P23526-2	15;12	Adenosylhomocysteinase	AHCY	34	47.716	432	0.95402	19	0.97181	19
Q00610-2;Q00610;A0A087WVQ6;J3KS13;A0A087WX41;P53675-2;P53675;K7EJJ5;J3KSQ2;J3KRF5;J3QL20;F5H5N6	54;54;54;15;15;15;15;5;3;3;1;1	Clathrin heavy chain 1	CLTC	36.4	187.89	1639	0.95375	100	0.96208	100
O00483	3	NADH dehydrogenase [ubiquinone] 1 alpha subcomplex subunit 4	NDUFA4	37	9.3697	81	0.9537	3	1.1025	3
O00505;H0Y4S9	9;2	Importin subunit alpha-4	KPNA3	18.8	57.81	521	0.95311	6	0.95331	6
P07195;A8MW50;C9J7H8;F5H793	10;6;5;4	L-lactate dehydrogenase B chain;L-lactate dehydrogenase	LDHB	34.1	36.638	334	0.95274	12	1.0771	12
Q32MZ4-3;Q32MZ4-2;Q32MZ4	7;7;7	Leucine-rich repeat flightless-interacting protein 1	LRRFIP1	12.5	82.688	752	0.95259	8	0.99001	8
Q8WUM4;Q8WUM4-2;Q8WUM4-3;C9IZF9;F8WDK9;F8WEQ7;F8WBR8	18;17;6;4;3;2;2	Programmed cell death 6-interacting protein	PDCD6IP	21.5	96.022	868	0.95229	17	0.98512	17
Q9BZL1	2	Ubiquitin-like protein 5	UBL5	28.8	8.5468	73	0.9522	2	1.0942	2
P08237;P08237-3;P08237-2;F8VP00;F8VX13;F8VNX2;F8VZQ1	5;5;4;2;1;1;1	6-phosphofructokinase, muscle type	PFKM	6.8	85.182	780	0.952	9	1.1398	9
D6R9A6;P26583	7;7	High mobility group protein B2	HMGB2	42.5	15.404	134	0.95192	6	0.99852	6
F5GXX5;P61803;F5H895;A0A0B4J239	4;4;2;2	Dolichyl-diphosphooligosaccharide--protein glycosyltransferase subunit DAD1	DAD1	47.1	9.5541	85	0.95188	5	1.0775	5
Q5QPL9;Q9UKM9-2;Q9UKM9;Q5QPM0;Q5QPM2;Q5QPM1	7;7;7;5;4;4	RNA-binding protein Raly	RALY	28.3	24.665	237	0.95184	10	0.87357	10
Q14103-3;Q14103;H0Y8G5;H0YA96;Q14103-4;Q14103-2;D6RAF8;D6RF44;D6RD83;D6RBQ9	16;16;15;14;14;14;10;7;6;6	Heterogeneous nuclear ribonucleoprotein D0	HNRNPD	45.8	32.834	306	0.95037	45	0.95173	45
O60832;O60832-2;C9IYT0;H7C0M1;H7BZF2;H7C2Q9;H7C2Q2	7;6;5;4;2;2;1	H/ACA ribonucleoprotein complex subunit 4	DKC1	19.1	57.673	514	0.95005	6	0.93187	6
B5MCF9;O00541-2;O00541;B3KXD6;H7BYY8;H7C267	8;8;8;4;1;1	Pescadillo homolog	PES1	14.5	66.077	571	0.94997	6	0.87454	6
F8W031;F8VXJ7;Q9Y2B0;F8W1K5;H0YI18;F8VP03;F8W0J2;F8W1U5;Q9Y2B0-2;F8VWQ5;F8VU34;F8VR34;F8VTT8;F8W4S1	6;5;5;4;2;2;1;1;1;1;1;1;1;1	Protein canopy homolog 2	CNPY2	27.8	29.224	263	0.9497	6	1.0536	6
A0A087X271;B4DDF4;Q99439;B4DUT8;K7ES69;Q99439-2;A0A087X1X5;H3BVI6	3;3;3;3;2;2;1;1	Calponin-2	CNN2	21.8	19.757	179	0.94965	3	0.94085	3
Q00059;H7BYN3;Q00059-2	7;6;5	Transcription factor A, mitochondrial	TFAM	24	29.096	246	0.94953	9	0.97109	9
Q9HDC9-2;Q9HDC9;H0Y512	4;4;3	Adipocyte plasma membrane-associated protein	APMAP	18.7	32.161	289	0.94922	4	1.1362	4
G3V4W0;B4DY08;B2R5W2;G3V4C1;P07910-2;G3V2Q1;P07910;G3V576;P07910-4;G3V555;G3V575;P07910-3;G3V5X6;G3V3K6;G3V251;B4DSU6;G3V5V7;G3V2D6;P0DMR1;O60812;B7ZW38;B2RXH8;A0A0G2JPF8;A0A0G2JNQ3;G3V4M8;G3V2H6;E5RG71;B3KT61;Q86SE5;Q86SE5-3	12;12;12;12;12;12;12;11;10;7;7;7;6;6;6;6;6;6;6;6;6;6;6;6;5;4;1;1;1;1	Heterogeneous nuclear ribonucleoproteins C1/C2;Heterogeneous nuclear ribonucleoprotein C-like 1	HNRNPC;HNRNPCL1;LOC649330;LOC440563	39.3	28.916	262	0.94911	34	0.84166	34
P62851	4	40S ribosomal protein S25	RPS25	24	13.742	125	0.94891	13	0.73321	13
P26038;V9GZ54	14;5	Moesin	MSN	22	67.819	577	0.94882	4	1.1614	4
Q5BKZ1-3;A0A0A0MRN4;Q5BKZ1	2;2;2	DBIRD complex subunit ZNF326	ZNF326	7.2	43.1	376	0.94874	4	0.84895	4
P22314-2;P22314;Q5JRR6;Q5JRR9;Q5JRS0;Q5JRS2;Q5JRS1;Q5JRS3	19;19;8;3;3;2;1;1	Ubiquitin-like modifier-activating enzyme 1	UBA1	23.9	113.8	1018	0.94868	38	1.0168	38
P08670;B0YJC4;B0YJC5;Q5JVS8;P17661;P14136-3;P14136;P14136-2;K7EKH6	18;17;11;7;3;2;2;2;1	Vimentin	VIM	37.6	53.651	466	0.94842	24	0.75191	24
Q9NXF7	2	DDB1- and CUL4-associated factor 16	DCAF16	10.2	24.193	216	0.94835	2	1.0296	1
Q92541;H0YKX1	5;1	RNA polymerase-associated protein RTF1 homolog	RTF1	8	80.313	710	0.94828	7	0.87157	7
P11586;F5H2F4;V9GYY3	8;8;2	C-1-tetrahydrofolate synthase, cytoplasmic;Methylenetetrahydrofolate dehydrogenase;Methenyltetrahydrofolate cyclohydrolase;Formyltetrahydrofolate synthetase;C-1-tetrahydrofolate synthase, cytoplasmic, N-terminally processed	MTHFD1	10.5	101.56	935	0.94789	7	1.0515	7
Q12765-3;Q12765;Q12765-2	2;2;2	Secernin-1	SCRN1	6.9	38.863	346	0.94786	2	0.9514	2
O15067;J3KTQ5	3;1	Phosphoribosylformylglycinamidine synthase	PFAS	2.4	144.73	1338	0.94763	2	1.1123	2
Q14697;F5H6X6	26;23	Neutral alpha-glucosidase AB	GANAB	28.4	106.87	944	0.94738	48	1.0352	48
O00267-2;O00267;M0QYL9	17;17;1	Transcription elongation factor SPT5	SUPT5H	16.8	120.5	1083	0.94703	30	0.89215	30
D6RIY6;Q06265;Q06265-2;D6R905;Q06265-3;Q06265-4;D6RAP4;H0Y9L5;D6RA17	3;3;3;2;2;2;1;1;1	Exosome complex component RRP45	EXOSC9	8	46.977	423	0.94648	3	0.92784	3
Q13907;Q13907-2;C9JD53;C9JKM8	3;3;1;1	Isopentenyl-diphosphate Delta-isomerase 1	IDI1	18.1	26.319	227	0.9464	3	0.90229	3
P42677;Q5T4L4;C9J1C5	5;4;1	40S ribosomal protein S27	RPS27	40.5	9.461	84	0.94639	11	0.83254	11
Q9H814	2	Phosphorylated adapter RNA export protein	PHAX	4.8	44.402	394	0.94637	4	0.92201	4
R4GN98;P06703	2;2	Protein S100-A6	S100A6	17.6	9.681	85	0.94608	2	1.0337	2
Q96B26	2	Exosome complex component RRP43	EXOSC8	7.2	30.039	276	0.94596	2	1.1364	2
O75643;B4E0P5;O75643-2	68;18;15	U5 small nuclear ribonucleoprotein 200 kDa helicase	SNRNP200	37.5	244.5	2136	0.94586	77	0.92607	77
Q07021;I3L3Q7;I3L3B0	6;4;4	Complement component 1 Q subcomponent-binding protein, mitochondrial	C1QBP	31.6	31.362	282	0.9455	10	0.95683	10
P06493;A0A024QZP7;E5RIU6;A0A087WZZ9;P06493-2;K7ELV5;E7ESI2;P24941-2;P24941;Q00526;G3V5T9;G3V317;F8VXD2;F8VYH9;P11802-2;F8VZZ0;F8VTV8;F8VWX7;F8VZ51;K7EJ83;Q00535-2;H0YAZ9;P11802;Q9BVE2;Q00534;E7EUK8;Q96Q40-2;P50750;Q96Q40-4;E5RGN0;Q96Q40-3;A0A087X209;O94921-3;Q96Q40-5;Q96Q40;A0A087WZU2;O94921-2;O94921;F5H6Z0;P50750-2;Q00536;Q00536-3;Q00537-2;Q00537;Q00536-2;J3QSD7;Q9NYV4-3;Q14004-2;Q9NYV4-2;Q9NYV4…	4;4;3;3;3;2;2;2;2;2;2;1;1;1;1;1;1;1;1;1;1;1;1;1;1;1;1;1;1;1;1;1;1;1;1;1;1;1;1;1;1;1;1;1;1;1;1;1;1;1;1	Cyclin-dependent kinase 1;Cyclin-dependent kinase 2;Cyclin-dependent kinase 3	CDK1;CDK3;CDK2	13.8	34.095	297	0.9454	5	1.0554	5
P60842;J3KT12;P60842-2;J3KTB5;J3QS69;J3QL43;J3QR64;J3QKZ9;J3QLN6;J3KS25;J3KSZ0;E7EQG2;Q14240;Q14240-2;J3KTN0;J3KSN7;J3KT04;J3KS93;E7EMV8;J3QL52;J3QQP0;E9PBH4;F8WE11	11;10;10;9;9;8;7;6;6;6;6;6;6;6;4;3;2;2;2;1;1;1;1	Eukaryotic initiation factor 4A-I;Eukaryotic initiation factor 4A-II	EIF4A1;EIF4A2	27.1	46.153	406	0.94515	15	0.99512	15
E9PIR7;F8W809;Q16881-5;Q16881-2;A0A087WSW9;Q16881-4;E9PNQ6;Q16881-3;Q16881-6;A0A087WSY9;Q16881;E2QRB9;Q16881-7;E9PKD3;E9PLT3;E9PKI4;A0A0B4J225;E9PIZ5;E9PRI8;E9PQI3	8;8;8;8;8;8;8;8;8;8;8;7;7;4;2;2;2;2;1;1	Thioredoxin reductase 1, cytoplasmic	TXNRD1	22.8	53.166	482	0.94492	12	0.93509	12
Q9Y2A7;Q9Y2A7-2	3;3	Nck-associated protein 1	NCKAP1	2.9	128.79	1128	0.94322	3	1.0727	3
Q01469;I6L8B7;A8MUU1	7;5;1	Fatty acid-binding protein, epidermal	FABP5	65.9	15.164	135	0.94298	11	0.99414	11
Q9Y617;Q9Y617-2	11;10	Phosphoserine aminotransferase	PSAT1	31.1	40.422	370	0.94234	16	1.0891	16
Q5TA02;P78417-3;P78417;Q5TA01;P78417-2	6;6;6;3;3	Glutathione S-transferase omega-1	GSTO1	31.5	23.341	200	0.94204	7	1.0064	7
Q9NYK5;Q9NYK5-2;C9JG87	5;5;4	39S ribosomal protein L39, mitochondrial	MRPL39	13.6	38.711	338	0.94177	4	1.1239	4
P48426-2;P48426;H7BXS3;S4R320;P78356	4;4;2;1;1	Phosphatidylinositol 5-phosphate 4-kinase type-2 alpha	PIP4K2A	11.8	39.802	347	0.94068	3	1.0828	3
O00303;H0YDT6;E9PQV8;A0A0D9SEZ9	9;3;1;1	Eukaryotic translation initiation factor 3 subunit F	EIF3F	28.9	37.563	357	0.94028	14	0.95679	14
I3L397;P63241;P63241-2;I3L504;F8WCJ1;C9J7B5;C9J4W5;Q9GZV4	7;7;7;7;3;3;3;3	Eukaryotic translation initiation factor 5A-1	EIF5A	32.2	16.019	146	0.9401	13	1.0378	13
Q9Y262;B0QY89;Q9Y262-2;B0QY90;C9JHP4;C9K0Q7;H7C3A0;H0Y7E6	24;24;23;18;7;7;5;2	Eukaryotic translation initiation factor 3 subunit L	EIF3L	44.3	66.726	564	0.93948	39	0.98761	39
P04083;Q5T3N1;Q5T3N0	14;6;3	Annexin A1	ANXA1	46	38.714	346	0.93942	20	1.1512	20
B2RB02;Q9Y2J2-3;A8K968;Q9Y2J2-2;Q9Y2J2-4;A0A0A0MRA8;Q9Y2J2;J3KT37;A0A0J9YW26;P11171-6;P11171-4;Q4VB86;P11171-3;P11171-7;P11171-5;P11171-2;P11171	4;4;4;4;4;4;3;2;1;1;1;1;1;1;1;1;1	Band 4.1-like protein 3;Band 4.1-like protein 3, N-terminally processed	EPB41L3	8.5	57.718	503	0.9392	2	0.99712	2
E9PGT1;Q15631;Q15631-2;H7C1D4;A0A0J9YVW2	3;3;2;2;1	Translin	TSN	20.6	25.572	223	0.93896	3	0.95219	3
A0A0D9SFB3;O00571-2;A0A0D9SG12;O00571;A0A0D9SF53;O15523-2;O15523;O15523-3;A0A0J9YVQ7;C9J8G5;C9J081;A0A087WVZ1;A0A0J9YYH6;B4DLA0;D6RCM4;Q9NQI0-3;Q9NQI0-2;Q9NQI0-4;Q9NQI0	19;19;19;19;19;15;15;5;4;3;3;2;2;1;1;1;1;1;1	ATP-dependent RNA helicase DDX3X;ATP-dependent RNA helicase DDX3Y	DDX3X;DDX3Y	33.8	70.839	640	0.93889	29	1.0349	29
Q9Y295	1	Developmentally-regulated GTP-binding protein 1	DRG1	3.8	40.542	367	0.93888	2	1.0872	2
C9J813;Q05682-5;E9PGZ1;Q05682-4;E7EX44;Q05682-3;Q05682-6;Q05682-2;Q05682	3;3;3;3;3;3;3;3;3	Caldesmon	CALD1	6.8	54.158	459	0.93859	3	1.1921	3
A0A087WZH7;P29966	5;5	Myristoylated alanine-rich C-kinase substrate	MARCKS	24.2	31.595	330	0.93816	11	1.1447	11
Q06323;H0YKK6;Q06323-3;Q06323-2	2;1;1;1	Proteasome activator complex subunit 1	PSME1	9.2	28.723	249	0.93763	2	1.1271	2
G3XAM7;P35221;P35221-2;P35221-3;P26232-4;A0A0A0MRI5;P26232-6;E5RGY6;E5RG03;E5RIB1;A0A0A0MTJ6;E5RJZ2;E5RIT8;E5RFM3;E5RJL0;E5RIE0;E5RHV7;H0YBB8;E5RJ41	7;7;7;4;3;3;3;2;2;2;2;1;1;1;1;1;1;1;1	Catenin alpha-1	CTNNA1	9.4	92.721	841	0.93742	8	0.98636	8
O00232;O00232-2	4;3	26S proteasome non-ATPase regulatory subunit 12	PSMD12	12.7	52.904	456	0.93729	4	1.109	4
Q8N983-4;Q8N983-3;H0Y6Y8;B1AL05;Q8N983-2;Q8N983;Q8N983-6;Q8N983-7;M0R051	4;3;3;3;3;3;3;3;1	39S ribosomal protein L43, mitochondrial	MRPL43	26.4	17.853	159	0.93709	4	0.96731	4
Q9BWD1;Q9BWD1-2	4;4	Acetyl-CoA acetyltransferase, cytosolic	ACAT2	14.1	41.35	397	0.93692	9	1.06	9
P49406;S4R3W9;A0A0A0MRF4;S4R455	4;3;3;1	39S ribosomal protein L19, mitochondrial	MRPL19	14	33.535	292	0.93574	3	0.83538	3
H0Y4R1;P12268;E7ETK5	11;11;4	Inosine-5-monophosphate dehydrogenase 2	IMPDH2	28.7	50.957	470	0.93569	15	0.9355	15
Q3LIE7;Q15392-2;Q15392;H7C4B7	2;2;2;1	Delta(24)-sterol reductase	Nbla03646;DHCR24	5.2	49.436	427	0.93542	2	1.0397	2
P48681	17	Nestin	NES	12.6	177.44	1621	0.93428	30	0.77847	30
E7ENJ6;Q9BXS5;Q9BXS5-2;K7ENA7;K7EJL1;K7EK69;K7ERH5;K7EL08;Q9Y6Q5;Q9Y6Q5-2	5;5;5;3;3;1;1;1;1;1	AP-1 complex subunit mu-1	AP1M1	14.6	42.636	370	0.934	4	1.0972	4
Q99459	5	Cell division cycle 5-like protein	CDC5L	8.5	92.25	802	0.93395	5	0.90323	5
Q9BYD1;H0YAX3;E5RJI7;E5RFI2	6;3;3;2	39S ribosomal protein L13, mitochondrial	MRPL13	34.8	20.692	178	0.93249	7	0.98267	7
O75083;D6RD66;O75083-3	7;5;3	WD repeat-containing protein 1	WDR1	14.7	66.193	606	0.93221	10	0.95561	10
Q13263-2;Q13263;M0R2I3;M0R3C0;M0R0K9	5;5;2;2;2	Transcription intermediary factor 1-beta	TRIM28	7.2	79.473	753	0.93195	3	1.0256	3
Q8WVC2;P63220;Q9BYK1;Q9BYK2	6;6;4;1	40S ribosomal protein S21	RPS21	65.4	8.85	81	0.93186	14	0.73462	14
Q15084-3;Q15084;Q15084-4;Q15084-5;Q15084-2	7;7;7;7;7	Protein disulfide-isomerase A6	PDIA6	20.4	47.837	437	0.93178	10	0.9566	10
H7C3S9;Q99627-2;E9PGT6;Q99627	3;3;3;3	COP9 signalosome complex subunit 8	COPS8	57.8	8.9341	83	0.93048	3	0.9261	3
P18669;P15259	4;1	Phosphoglycerate mutase 1	PGAM1	22	28.804	254	0.93015	6	1.0273	6
P61970;H3BRV9	3;2	Nuclear transport factor 2	NUTF2	24.4	14.478	127	0.93004	3	1.1453	3
P38606-2;P38606;C9JA17;C9JVW8	5;5;2;2	V-type proton ATPase catalytic subunit A	ATP6V1A	11	64.735	584	0.92992	5	0.98637	5
Q13501-2;Q13501;E7EMC7;E9PFW8;C9JRJ8;E3W990	5;5;4;3;2;1	Sequestosome-1	SQSTM1	22.5	38.629	356	0.92987	8	0.92463	8
P62273;A0A087WTT6;P62273-2	3;2;2	40S ribosomal protein S29	RPS29	46.4	6.6767	56	0.92963	5	0.78718	5
Q15233-2;Q15233;C9IZL7;H7C367;C9JYS8;C9J4X2	6;6;4;4;4;1	Non-POU domain-containing octamer-binding protein	NONO	16	43.866	382	0.92962	6	1.0104	6
P16435;E7EMD0;H0Y4R2	6;5;5	NADPH--cytochrome P450 reductase	POR	10.6	76.689	677	0.92905	6	1.0243	6
P16615-5;P16615-2;P16615-3;P16615;P16615-4;H7C5W9;O14983-2;O14983;O14983-3;H3BVB2;Q93084-4;Q93084-2;Q93084-3;Q93084-7;Q93084;Q93084-6;Q93084-5	8;8;8;8;6;5;3;3;2;1;1;1;1;1;1;1;1	Sarcoplasmic/endoplasmic reticulum calcium ATPase 2	ATP2A2	10.5	109.73	997	0.9288	10	0.96659	10
O00425;O00425-2;F8WD15	21;9;6	Insulin-like growth factor 2 mRNA-binding protein 3	IGF2BP3	43.2	63.704	579	0.92842	35	0.72907	35
Q96PZ0;E7EUH7	5;3	Pseudouridylate synthase 7 homolog	PUS7	9.4	75.035	661	0.92839	6	0.96111	6
P00390-2;P00390-3;P00390;P00390-5;P00390-4;E5RI06;H0YC68	7;7;7;6;6;2;1	Glutathione reductase, mitochondrial	GSR	21.7	51.7	479	0.92829	9	1.1813	9
P00352;Q5SYQ9;Q5SYQ8;Q5SYQ7;H0Y2X5;O94788-4;O94788-2;H0YMG7;O94788-3;P47895;P30837;O94788	27;11;11;10;1;1;1;1;1;1;1;1	Retinal dehydrogenase 1	ALDH1A1	58.3	54.861	501	0.92811	54	1.0621	54
P25398	7	40S ribosomal protein S12	RPS12	53.8	14.515	132	0.92797	23	0.74532	23
P78362;P78362-2;H7C521;H7C5L6;F8WBW4;C9J2M4;C9JWF7	11;11;5;4;3;2;2	SRSF protein kinase 2;SRSF protein kinase 2 N-terminal;SRSF protein kinase 2 C-terminal	SRPK2	18.2	77.526	688	0.92795	16	0.81072	16
P52209-2;P52209;K7EM49;K7EMN2;K7EPF6;K7ELN9	11;11;6;5;5;2	6-phosphogluconate dehydrogenase, decarboxylating	PGD	31.1	51.872	470	0.92786	13	1.0067	13
Q96FQ6	3	Protein S100-A16	S100A16	33	11.801	103	0.92778	2	1.0988	2
P20700;E9PBF6;A0A0D9SFE5;A0A0D9SFY5	14;12;11;7	Lamin-B1	LMNB1	22.7	66.408	586	0.92768	12	0.98312	12
U3KQC1;K7EIR0;A0A0A0MQU0;Q9BV38;K7EML4	2;2;2;2;1	WD repeat-containing protein 18	WDR18	4.8	43.237	394	0.92662	2	0.91817	2
Q9H074-3;Q9H074-2;Q9H074;D6REB4;H0YA44;D6RJF2	4;4;4;3;1;1	Polyadenylate-binding protein-interacting protein 1	PAIP1	10.6	42.006	367	0.92611	6	0.92332	6
B1AHB1;P33992	3;3	DNA replication licensing factor MCM5	MCM5	5.4	77.592	691	0.92593	6	1.1379	6
Q9BYC9;I3L2X1;Q9BYC9-2	3;1;1	39S ribosomal protein L20, mitochondrial	MRPL20	20.1	17.442	149	0.9257	3	1.0184	3
P52272-2;P52272;A0A087X0X3;M0R019;M0R2T0;M0R0N3;M0QYQ7;M0R0Y6;M0QYL3;M0QY96;M0R2I7;M0QZM1	9;9;8;7;6;5;3;2;1;1;1;1	Heterogeneous nuclear ribonucleoprotein M	HNRNPM	17.1	73.62	691	0.92565	19	1.01	19
Q9NX24;H0YC83;D6RC52;D6RCB9	2;1;1;1	H/ACA ribonucleoprotein complex subunit 2	NHP2	13.1	17.201	153	0.92519	2	0.87051	2
P39019;M0R2L9;M0QXK4;M0QYF7;M0R140;A0A075B6E2	11;6;6;6;6;4	40S ribosomal protein S19	RPS19	50.3	16.06	145	0.92498	27	0.73083	27
Q16401-2;Q16401;F2Z3J2	8;8;3	26S proteasome non-ATPase regulatory subunit 5	PSMD5	20.6	51.311	461	0.92448	7	0.93109	7
Q7Z7F7;Q7Z7F7-2;X6R631;X6RIW1	2;2;1;1	39S ribosomal protein L55, mitochondrial	MRPL55	18.8	15.128	128	0.92424	6	0.92248	6
P67775-2;P67775;P62714;H0YBN9;E5RI56;H0YC23	3;3;2;1;1;1	Serine/threonine-protein phosphatase 2A catalytic subunit alpha isoform;Serine/threonine-protein phosphatase 2A catalytic subunit beta isoform	PPP2CA;PPP2CB	14.9	29.734	255	0.924	3	0.9773	3
O00178	2	GTP-binding protein 1	GTPBP1	4.2	72.453	669	0.92376	2	1.0014	2
P62857	3	40S ribosomal protein S28	RPS28	46.4	7.8409	69	0.92279	9	0.71302	9
P52815;B4DLN1;F6QW41	4;4;1	39S ribosomal protein L12, mitochondrial	MRPL12;SLC25A10	16.2	21.348	198	0.92259	6	0.88113	6
P00558;P00558-2;P07205	13;12;3	Phosphoglycerate kinase 1	PGK1	36.5	44.614	417	0.92174	14	1.0237	14
Q9H3K6;Q9H3K6-2;H3BV85;H3BTW0;A0A0B4J295;H3BVE0	2;1;1;1;1;1	BolA-like protein 2	BOLA2;BOLA2B;LOC101060252	29.1	10.116	86	0.92163	2	0.98636	2
P57772-2;P57772;C9J8T0	2;2;1	Selenocysteine-specific elongation factor	EEFSEC	6	62.578	569	0.92135	2	0.94707	2
Q7Z6Z7-2;Q7Z6Z7-3;Q7Z6Z7;H0Y659;A0A087X146;A0A0K0K1E0	52;52;52;12;3;2	E3 ubiquitin-protein ligase HUWE1	HUWE1	14.8	480.19	4358	0.9212	58	0.9991	58
E5RIW3;O75347;E5RJD8;O75347-2;E5RHG6;E5RIX8	5;5;5;4;4;1	Tubulin-specific chaperone A	TBCA	53.6	10.08	84	0.92115	7	1.0901	7
P19338;H7BY16;C9JYW2;C9JLB1;C9J1H7;C9JWL1	31;18;4;4;4;4	Nucleolin	NCL	35.4	76.613	710	0.92115	149	0.86936	149
Q9HD33-2;Q9HD33;Q9HD33-3	2;2;1	39S ribosomal protein L47, mitochondrial	MRPL47	10	27.085	230	0.92111	2	0.9773	2
P31930	3	Cytochrome b-c1 complex subunit 1, mitochondrial	UQCRC1	9	52.645	480	0.92098	3	0.99194	3
P13797-3;P13797-2;A0A0A0MSQ0;P13797;H7C4N2;P13796;Q14651;U3KQI3;Q5TBN3;C9JAM8	9;9;9;9;4;3;3;2;2;2	Plastin-3	PLS3	16.6	65.632	585	0.92094	8	0.9195	8
C9JFE4;A0A096LP07;Q13098-5;A0A096LPJ3;Q13098;A8K070;Q13098-7;Q13098-6;J3QS84;J3QS88;J3KTB0;J3QLE8;J3QLT0;J3QL53;J3KRE8;J3KSA5;J3KRJ4	3;3;3;3;3;3;3;2;1;1;1;1;1;1;1;1;1	COP9 signalosome complex subunit 1	GPS1	7	53.371	471	0.92089	5	1.2125	5
Q7Z4V5;Q7Z4V5-2;Q7Z4V5-3;Q7Z4V5-4;K7EPS6;K7ERA4;A0A087WX58;A0A087WZ99;M0R0J3;A0A087WT54	9;8;8;7;5;3;2;1;1;1	Hepatoma-derived growth factor-related protein 2	HDGFRP2	15.5	74.316	671	0.92066	19	0.82857	19
Q6P2Q9;I3L0J9;I3L3Z8;I3L1T8	68;24;9;1	Pre-mRNA-processing-splicing factor 8	PRPF8	32	273.6	2335	0.92064	69	0.91317	69
P14324-2;P14324;A0A087X090;A0A087X1D8;A0A087WVN4	4;4;3;1;1	Farnesyl pyrophosphate synthase	FDPS	12.2	40.532	353	0.92038	4	1.0558	4
F2Z2V0;Q99829;B0QZ18;E7ENH5;A6PVH9;Q5JX56;Q5JX58;H0Y524;Q5JX59;Q5JX60;Q5JX44;Q5JX45;Q5JX54;Q5JX55;Q5JX61;Q5JX52	4;4;4;3;3;2;2;2;2;2;2;2;1;1;1;1	Copine-1	CPNE1	8.4	58.634	533	0.92032	6	0.98793	6
Q5TEE2;Q13547	2;2	Histone deacetylase 1	HDAC1	9.5	24.544	211	0.92028	3	0.93367	3
P45974-2;P45974	4;4	Ubiquitin carboxyl-terminal hydrolase 5	USP5	5	93.307	835	0.92021	3	1.0416	3
Q13243;Q13243-3;B4DJK0;B4DUA4;G3V5K8;Q13243-2	7;6;4;4;3;3	Serine/arginine-rich splicing factor 5	SRSF5	27.6	31.263	272	0.9199	15	0.9267	15
Q15274;C9JCJ5	4;3	Nicotinate-nucleotide pyrophosphorylase [carboxylating]	QPRT	14.8	30.845	297	0.91946	3	1.0915	3
P00505-2;P00505	3;3	Aspartate aminotransferase, mitochondrial	GOT2	8.8	43.029	387	0.91913	5	1.0004	5
P42704;B8ZZ38;A0A0C4DG06;C9JCA9;A0A0C4DG51;Q9NP80-3;Q9NP80-2;Q9NP80	28;8;8;7;1;1;1;1	Leucine-rich PPR motif-containing protein, mitochondrial	LRPPRC	21	157.9	1394	0.91898	36	1.1022	36
Q15125;C9J719;C9JJ78	3;2;2	3-beta-hydroxysteroid-Delta(8),Delta(7)-isomerase	EBP	16.5	26.352	230	0.91873	11	1.0694	11
Q12797-10;Q12797;E5RHJ2;E5RHK2;G3XAN5;E5RG29;Q12797-7;Q12797-4;Q12797-3;Q12797-9;Q12797-6;A0A0A0MSK8;Q12797-5;Q12797-8;Q12797-2;E5RG56	4;4;1;1;1;1;1;1;1;1;1;1;1;1;1;1	Aspartyl/asparaginyl beta-hydroxylase	ASPH	7.4	83.267	729	0.91836	4	0.88953	4
Q9NPD3;E9PI41;E9PPI9	5;4;1	Exosome complex component RRP41	EXOSC4	21.2	26.383	245	0.91745	4	1.0039	4
Q16543;K7EL68;K7EQA9;K7EIU0;K7EKQ2	6;3;3;2;2	Hsp90 co-chaperone Cdc37;Hsp90 co-chaperone Cdc37, N-terminally processed	CDC37	20.9	44.468	378	0.91741	5	0.89224	5
Q96EL3	4	39S ribosomal protein L53, mitochondrial	MRPL53	49.1	12.107	112	0.91739	7	0.96236	7
P54727;Q5W0S5;K7ENJ0;K7ELW1;P54725-2;P54727-2;P54725-3;P54725	3;2;1;1;1;1;1;1	UV excision repair protein RAD23 homolog B	RAD23B	9	43.171	409	0.91726	4	0.97653	4
Q9BRJ2;A0A087X2D5	1;1	39S ribosomal protein L45, mitochondrial	MRPL45	5.2	35.351	306	0.91718	2	0.83439	2
Q13428-3;Q13428-8;Q13428;Q13428-4;Q13428-2;Q13428-7;E7ETY2;J3KQ96;Q13428-6;Q13428-5;H0YA99	33;32;32;32;31;30;30;29;29;21;5	Treacle protein	TCOF1	24	152.2	1489	0.91693	71	0.83598	71
Q6PD62;H0YCE8	15;3	RNA polymerase-associated protein CTR9 homolog	CTR9	14.4	133.5	1173	0.91652	13	0.91722	13
Q92922	4	SWI/SNF complex subunit SMARCC1	SMARCC1	4.1	122.87	1105	0.91641	5	1.0815	5
P06733;P06733-2;K7EM90;F5H1C3;E5RI09;E5RG95;K7EPM1;K7EKN2;E5RGZ4;F5H0C8;P13929-3;P09104-2;P13929-2;P13929;P09104	18;11;9;1;1;1;1;1;1;1;1;1;1;1;1	Alpha-enolase;Enolase	ENO1	49.8	47.168	434	0.91606	45	1.0126	45
Q13838;Q13838-2;A0A0G2JJZ9;Q5STU3;H0Y400;F6WLT2;F6S4E6;A0A0A0MT12;F6TRA5;F6UJC5;F6QYI9;A0A0G2JJL7;F6R6M7;K7ENP6;A0A0G2JHN7;K7EL56;K7EIL8;F6U6E2;K7EN69;F6S2B7;F6SXL5;H0YCC6;K7EPJ3	9;9;7;7;5;5;4;4;4;4;3;3;3;2;2;2;2;2;2;2;2;2;2	Spliceosome RNA helicase DDX39B	DDX39B	24.3	48.991	428	0.91506	9	0.9335	9
P27797;K7EJB9;K7EL50	13;9;2	Calreticulin	CALR	40.5	48.141	417	0.91458	33	1.0025	33
H7BZJ3	5	Thioredoxin	PDIA3	48	13.519	123	0.91413	2	1.0563	2
Q9H6F5-2;Q9H6F5	2;2	Coiled-coil domain-containing protein 86	CCDC86	16.3	12.743	104	0.91391	4	0.80401	4
F5GY37;J3KPX7;Q99623;Q99623-2;F5H3X6;F5GWA7;F5H0C5;F5H2D2	8;8;8;7;6;5;3;2	Prohibitin-2	PHB2	34.5	29.723	267	0.91388	7	0.97249	7
Q9BY44-3;Q9BY44;Q9BY44-4;F8WAE5;C9IZE1;H7C5Q3;Q9BY44-2;H7C5R5;F8WF18;F8WAT3	8;8;7;7;5;3;3;2;1;1	Eukaryotic translation initiation factor 2A	EIF2A	18.2	62.288	560	0.91349	9	1.0618	9
Q9BXP5-5;Q9BXP5-4;Q9BXP5-2;Q9BXP5-3;Q9BXP5;H7C3A1;A0A0A0MSP6	7;7;7;7;7;6;1	Serrate RNA effector molecule homolog	SRRT	9.9	96.221	839	0.91345	10	1.0262	10
A0A0R4J2F3;Q9Y2S0	1;1	DNA-directed RNA polymerases I and III subunit RPAC2	POLR1D	15.5	13.262	116	0.9127	2	0.82293	2
Q13045-2;Q13045-3;Q13045	3;3;3	Protein flightless-1 homolog	FLII	2.1	138.49	1214	0.91256	4	0.93157	4
F5H6I7;Q6DD88;F5GWF8	6;6;2	Atlastin-3	ATL3	12	58.772	523	0.91246	8	0.96296	8
O14579-3;O14579-2;O14579;M0QXB4;M0R061;A0A087X0I4	3;3;3;3;2;2	Coatomer subunit epsilon	COPE	19.9	28.772	256	0.91238	2	1.0329	2
Q92769-3;Q92769	2;2	Histone deacetylase 2	HDAC2	4.6	51.998	458	0.91226	2	0.99292	2
E9PCY5;Q02880-2;Q02880;J3KTB7	11;11;11;1	DNA topoisomerase 2;DNA topoisomerase 2-beta	TOP2B	10.2	130.48	1150	0.91225	16	1.0451	16
Q9BRX2	4	Protein pelota homolog	PELO	10.4	43.359	385	0.9118	3	0.90472	3
Q9NRX4-2;Q9NRX4	1;1	14 kDa phosphohistidine phosphatase	PHPT1	9.7	13.671	124	0.91175	2	0.9375	2
Q93009-3;Q93009;F5H2X1;H3BND8	4;4;1;1	Ubiquitin carboxyl-terminal hydrolase 7	USP7	3.4	126.27	1086	0.91173	4	0.93529	4
O75874;C9J4N6;C9JJE5;C9JLU6	15;8;2;2	Isocitrate dehydrogenase [NADP] cytoplasmic	IDH1	35.3	46.659	414	0.91138	16	1.0122	16
P12429;D6RAZ8;D6RCA8;D6RFG5;D6RA82	2;1;1;1;1	Annexin A3;Annexin	ANXA3	5.3	36.375	323	0.91137	3	1.1804	3
P14314-2;P14314;K7ELL7;A0A0C4DGP4;K7EPW7;K7EKX1;K7EJ70	10;10;10;4;2;1;1	Glucosidase 2 subunit beta	PRKCSH	22.3	59.177	525	0.91133	16	1.0036	16
P11717;S4R328	19;2	Cation-independent mannose-6-phosphate receptor	IGF2R	8.6	274.37	2491	0.91109	16	1.0206	16
E5RIF1;D6RG00;Q13404-8;Q15819;Q13404;H0YBX6;Q13404-7;Q13404-2;Q13404-1;I3L0A0;G3V2F7;G3V113	2;2;2;2;2;2;2;2;2;2;1;1	Ubiquitin-conjugating enzyme E2 variant 1;Ubiquitin-conjugating enzyme E2 variant 2	UBE2V2;UBE2V1;TMEM189	38.5	5.7715	52	0.91094	2	1.006	2
F5GY55;Q16531;F5GWI0;F5GZY8;F5H2L3;F5GYG8;Q16531-2;F5H198	22;22;8;8;8;5;4;2	DNA damage-binding protein 1	DDB1	20	121.71	1092	0.91052	38	0.89581	38
P05386	2	60S acidic ribosomal protein P1	RPLP1	51.8	11.514	114	0.91019	4	0.82437	4
P51858;P51858-2;P51858-3	4;3;3	Hepatoma-derived growth factor	HDGF	21.7	26.788	240	0.91005	7	1.0341	7
Q01105-2;Q01105-3;A0A0C4DFV9;Q01105-4;Q01105;A0A087X027;P0DME0	10;8;8;8;8;5;5	Protein SET	SET	33.9	32.103	277	0.91	21	0.96603	21
E7EVG2;Q86U86-5;Q86U86-7;Q86U86-3;Q86U86-2;Q86U86-8;Q86U86;Q86U86-4;Q86U86-9;H0Y5B5;Q86U86-6	4;4;4;4;4;4;4;3;3;2;1	Protein polybromo-1	PBRM1	2.7	168.45	1460	0.91	3	0.878	3
Q9NQ50	3	39S ribosomal protein L40, mitochondrial	MRPL40	20.4	24.49	206	0.90988	4	0.87353	4
A2IDC6;Q13084;A2IDC7;Q4TT37	2;2;1;1	39S ribosomal protein L28, mitochondrial	MRPL28	10.4	28.506	240	0.9098	2	0.87701	2
Q9UNF1-2;Q5H909;Q9UNF1;Q5H907;Q9Y5V3;Q9Y5V3-2	4;4;4;3;1;1	Melanoma-associated antigen D2	MAGED2	6.6	63.167	588	0.90975	3	1.2996	3
O00743-2;O00743;O00743-3	4;4;4	Serine/threonine-protein phosphatase 6 catalytic subunit	PPP6C	16.3	32.532	283	0.90971	5	0.92694	5
Q9Y266;A0A0A0MSS4;A0A0A0MSU9	3;2;2	Nuclear migration protein nudC	NUDC	10.6	38.242	331	0.90947	3	1.0479	4
Q9UHR5-2;Q9UHR5;J3QQJ0;J3KS14;F5H478;J3KRU5;X6R3T8;J3QLH3	2;2;2;1;1;1;1;1	SAP30-binding protein	SAP30BP	9.2	32.068	292	0.90944	2	1.008	2
Q9H7E9;Q9H7E9-2	2;2	UPF0488 protein C8orf33	C8orf33	9.6	24.992	229	0.90942	2	0.92467	2
Q5VU11;P78346;P78346-2;Q5VU10	3;3;3;1	Ribonuclease P protein subunit p30	RPP30	13.4	28.112	254	0.90911	3	0.82983	3
P27816;E7EVA0;P27816-6;P27816-2;P27816-4;H0Y2V1;H7C4C5;P27816-5;F8W9U4;B5MEG9	17;17;16;14;11;8;8;8;8;7	Microtubule-associated protein 4;Microtubule-associated protein	MAP4	18.5	121	1152	0.90896	19	0.95899	19
F8VPD4;P27708;H7C3Z5;H7BZB3;H7C2E4;P31327-2;P31327;P31327-3	18;18;2;1;1;1;1;1	CAD protein;Glutamine-dependent carbamoyl-phosphate synthase;Aspartate carbamoyltransferase;Dihydroorotase	CAD	8.6	236.02	2162	0.90854	19	1.0795	19
P08708;H0YN88;A0A075B716;H0YN73;H3BNC9	7;6;6;5;2	40S ribosomal protein S17	RPS17;RPS17L	40	15.55	135	0.90839	16	0.71475	16
F8VUA7;F8VQX7;Q9BZF1-3;Q9BZF1-2;Q9BZF1	1;1;1;1;1	Oxysterol-binding protein;Oxysterol-binding protein-related protein 8	OSBPL8	1.6	79.052	694	0.90774	2	0.87294	2
P24928;A0A0C4DGZ0;A0A087WWE2;P24928-2	21;21;19;6	DNA-directed RNA polymerase II subunit RPB1	POLR2A	13.1	217.17	1970	0.90762	20	0.89825	20
P36915;P36915-2;A2AB27	10;8;3	Guanine nucleotide-binding protein-like 1	GNL1	19.9	68.66	607	0.90738	10	1.012	10
P62913;P62913-2;Q5VVC8;Q5VVC9	9;8;7;5	60S ribosomal protein L11	RPL11	44.4	20.252	178	0.90709	22	0.70535	22
Q96K17-2;E9PL10;Q96K17	2;2;2	Transcription factor BTF3 homolog 4	BTF3L4	20	10.905	100	0.90694	2	0.97004	3
P30101	16	Protein disulfide-isomerase A3	PDIA3	37.4	56.782	505	0.90629	31	0.95507	31
Q09666;Q8IVF2-3;Q8IVF2	94;1;1	Neuroblast differentiation-associated protein AHNAK	AHNAK	36.7	629.09	5890	0.90569	119	0.97065	119
P49756;P49756-2;P49756-3;H0YE46;E9PQU5	3;2;2;1;1	RNA-binding protein 25	RBM25	4.6	100.18	843	0.90555	3	0.87914	3
P62269;J3JS69;A0A0G2JQH2;Q5GGW2	13;3;2;2	40S ribosomal protein S18	RPS18	53.9	17.718	152	0.90537	25	0.72827	25
E9PKV2;Q9NRX2	2;2	39S ribosomal protein L17, mitochondrial	MRPL17	11.3	16.371	142	0.9045	4	0.92218	4
O94903;E5RFX7;E5RG77	2;1;1	Proline synthase co-transcribed bacterial homolog protein	PROSC	8	30.344	275	0.90446	2	1.115	2
F5H365;Q15436;Q15436-2;G3V4V1;G3V1W4;G3V3G5;G3V2R6;G3V5X8;G3V4Q2;G3V5K1	11;11;6;5;5;5;5;4;4;2	Protein transport protein Sec23A	SEC23A	19.2	82.968	736	0.90394	9	0.93493	9
P07741-2;H3BQF1;P07741;H3BSW3;H3BQZ9;H3BQB1	6;6;6;5;5;4	Adenine phosphoribosyltransferase	APRT	41.8	14.557	134	0.90381	4	1.0632	4
P49327;J3KTF0	102;1	Fatty acid synthase;[Acyl-carrier-protein] S-acetyltransferase;[Acyl-carrier-protein] S-malonyltransferase;3-oxoacyl-[acyl-carrier-protein] synthase;3-oxoacyl-[acyl-carrier-protein] reductase;3-hydroxyacyl-[acyl-carrier-protein] dehydratase;Enoyl-[acyl-carrier-protein] reductase;Oleoyl-[acyl-carrier-protein] hydrolase	FASN	51.8	273.42	2511	0.90337	166	1.0125	166
O60684;O15131	4;3	Importin subunit alpha-7;Importin subunit alpha-6	KPNA6;KPNA5	10.8	60.029	536	0.90264	6	0.86735	6
P78347-2;P78347-4;P78347-3;P78347;P78347-5	5;5;5;5;2	General transcription factor II-I	GTF2I	5.1	107.97	957	0.90213	5	1.1191	5
P08758;D6RBL5;D6RBE9;E9PHT9;D6RCN3	14;9;8;7;1	Annexin A5;Annexin	ANXA5	47.5	35.936	320	0.90207	15	0.98257	15
K7ENK9;K7EKX0;Q15836;J3QRU4;P63027;F8WCA0;L7N2F9	1;1;1;1;1;1;1	Vesicle-associated membrane protein 3;Vesicle-associated membrane protein 2	VAMP2;VAMP3	25	7.7752	68	0.90169	2	0.84093	2
Q71UM5;H0YMV8;C9JLI6	4;4;3	40S ribosomal protein S27-like;40S ribosomal protein S27	RPS27L	39.3	9.4771	84	0.90153	5	0.84641	5
P13667	20	Protein disulfide-isomerase A4	PDIA4	36.7	72.932	645	0.90148	29	1.0196	29
P41250;H7C443	12;1	Glycine--tRNA ligase	GARS	20.8	83.165	739	0.9012	16	1.042	16
H7C2P7;Q16540;A6NJD9;A8MVT4;A8MYK1	3;3;3;3;3	39S ribosomal protein L23, mitochondrial	MRPL23	31.4	13.669	118	0.90113	3	0.75701	3
Q7L2E3-3;H7BXY3;Q7L2E3;Q7L2E3-2	24;24;24;24	Putative ATP-dependent RNA helicase DHX30	DHX30	23.2	129.44	1155	0.90101	42	0.79165	42
Q5TCU3;P07951-2;P07951;Q5TCU8;CON__Q3SX28;P07951-3	10;9;9;9;8;7	Tropomyosin beta chain	TPM2	28.5	32.814	284	0.901	5	1.0074	5
P33993;P33993-3;P33993-2;C9J8M6	8;7;4;2	DNA replication licensing factor MCM7	MCM7	15.2	81.307	719	0.89965	12	0.93511	12
O96019;H7C5S0;O96019-2;O94805;C9JQT2	3;2;2;2;1	Actin-like protein 6A;Actin-like protein 6B	ACTL6A;ACTL6B	8.4	47.46	429	0.89954	3	1.019	3
P36871-3;P36871;P36871-2	3;3;3	Phosphoglucomutase-1	PGM1	10.4	40.282	365	0.89953	3	0.75111	3
Q9NSE4	2	Isoleucine--tRNA ligase, mitochondrial	IARS2	2.2	113.79	1012	0.89907	2	0.9837	2
Q96DV4;Q96DV4-2	3;1	39S ribosomal protein L38, mitochondrial	MRPL38	7.1	44.596	380	0.89884	3	0.81801	3
O60701;O60701-2;O60701-3;E7ER95;E7ER83;E7ETF4;E7EV97;D6RHF4;E9PBD2	19;18;16;3;3;3;3;1;1	UDP-glucose 6-dehydrogenase	UGDH	48.4	55.023	494	0.89818	28	1.0292	28
P09211;A8MX94;A0A087X2E9;A0A087X243	9;6;4;1	Glutathione S-transferase P	GSTP1	57.1	23.356	210	0.89725	26	1.0765	26
H0YN26;P39687;H7BZ09;O95626;O43423	12;12;2;2;2	Acidic leucine-rich nuclear phosphoprotein 32 family member A	ANP32A	53.1	19.997	177	0.89694	21	0.95743	21
A0A087WX29;Q13148;A0A087WXQ5;K7EJM5;A0A087WV68;K7EN94;B1AKP7;G3V162;Q13148-4;A0A087X260;A0A087WYY0	2;2;1;1;1;1;1;1;1;1;1	TAR DNA-binding protein 43	TARDBP	12.3	26.743	243	0.89669	2	1.0907	2
P20020-5;P20020-2;P20020-6;P20020-3;P20020-4;P20020;E7ERY9;Q16720-8;P23634-5;Q16720-7;P23634-4;Q16720-6;P23634-3;Q16720-3;Q16720-5;P23634-2;Q16720-2;P23634-7;P23634-6;Q16720-4;Q16720;P23634-8;P23634	3;3;3;3;3;3;2;1;1;1;1;1;1;1;1;1;1;1;1;1;1;1;1	Plasma membrane calcium-transporting ATPase 1	ATP2B1	3.8	129.15	1171	0.8966	3	0.7864	3
Q9H501;A0A087WX71	2;1	ESF1 homolog	ESF1	2.1	98.795	851	0.89507	4	0.92816	4
Q07065	24	Cytoskeleton-associated protein 4	CKAP4	44.5	66.022	602	0.89427	24	0.94877	24
A8MW49;P07148;Q9NQV6-6	5;5;1	Fatty acid-binding protein, liver	FABP1	42.7	13.808	124	0.89426	5	0.99572	5
Q9Y2S6	1	Translation machinery-associated protein 7	TMA7	14.1	7.0662	64	0.89358	2	0.88744	2
O00567;Q5JXT2;H0Y653;H0YDU4	13;8;5;5	Nucleolar protein 56	NOP56	23.4	66.049	594	0.89353	14	0.88981	14
Q14980-4;Q14980-3;Q14980-2;Q14980;A0A087WY61;F5H4J1;F5H6Y5;H0YFY6;Q14980-5;K4DIE0;F5H1L0;F5GZW1;F5H2F3;F5H3L6;F5H0Z7;F5H763	14;14;14;14;13;5;4;4;3;2;1;1;1;1;1;1	Nuclear mitotic apparatus protein 1	NUMA1	9.7	200.09	1763	0.89338	15	0.97598	15
P10515;H0YDD4;E9PEJ4	7;6;6	Dihydrolipoyllysine-residue acetyltransferase component of pyruvate dehydrogenase complex, mitochondrial	DLAT	12.2	68.996	647	0.89291	8	0.90814	8
J3KNF4;O14618;E9PP76;E9PK03	3;3;2;1	Copper chaperone for superoxide dismutase;Superoxide dismutase [Cu-Zn]	CCS	11	27.086	255	0.89283	3	0.99139	3
P60866;P60866-2;E5RJX2;E5RIP1;G3XAN0	5;5;3;2;2	40S ribosomal protein S20	RPS20	29.4	13.373	119	0.89282	14	0.69797	14
I3L1L3;Q9BQG0;Q9BQG0-2;I3L2H8	19;19;19;3	Myb-binding protein 1A	MYBBP1A	15.8	140.13	1252	0.89272	17	0.88451	17
P11766;H0YAG8;D6RFE4	4;2;1	Alcohol dehydrogenase class-3	ADH5	16.6	39.724	374	0.89121	4	1.1732	4
P21796;C9JI87	4;2	Voltage-dependent anion-selective channel protein 1	VDAC1	17.3	30.772	283	0.89083	5	1.0636	5
H7C463;C9J406;B9A067;Q16891-3;Q16891-2;Q16891-4;Q16891	3;3;3;3;3;3;3	Mitochondrial inner membrane protein	IMMT	7.7	68.064	613	0.89058	3	0.89177	3
Q9BRA2;I3L0K2;I3L3M7;I3L2R6	5;3;3;3	Thioredoxin domain-containing protein 17	TXNDC17	43.9	13.941	123	0.89042	9	0.98017	9
Q99880;Q99879;Q99877;Q93079;Q5QNW6;P62807;P58876;P57053;O60814;B2R4S9;Q5QNW6-2;U3KQK0;Q8N257;Q16778;P33778;P23527;P06899;Q96A08	5;5;5;5;5;5;5;5;5;5;5;5;3;3;3;3;3;2	Histone H2B type 1-L;Histone H2B type 1-M;Histone H2B type 1-N;Histone H2B type 1-H;Histone H2B type 2-F;Histone H2B type 1-C/E/F/G/I;Histone H2B type 1-D;Histone H2B type F-S;Histone H2B type 1-K;Histone H2B;Histone H2B type 3-B;Histone H2B type 2-E;Histone H2B type 1-B;Histone H2B type 1-O;Histone H2B type 1-J	HIST1H2BL;HIST1H2BM;HIST1H2BN;HIST1H2BH;HIST2H2BF;HIST1H2BC;HIST1H2BD;H2BFS;HIST1H2BK;HIST1H2BI;HIST3H2BB;HIST2H2BE;HIST1H2BB;HIST1H2BO;HIST1H2BJ	35.7	13.952	126	0.89017	16	0.79974	16
Q92614-2;Q92614-3;A0A0D9SFK2;Q92614-4;Q92614;Q92614-5;H0YEV9	5;5;5;5;5;4;1	Unconventional myosin-XVIIIa	MYO18A	3.5	196.44	1723	0.88977	4	0.95602	4
K7EQ02;Q96EP5-2;K7EQ55;K7EK33;Q96EP5	2;2;2;2;2	DAZ-associated protein 1	DAZAP1	9.8	35.02	327	0.88944	4	0.90938	4
P29401;P29401-2;A0A0B4J1R6;E9PFF2;F8W888;F8WAX4	22;22;19;8;3;1	Transketolase	TKT	39.2	67.877	623	0.88884	26	1.0521	26
P26640;P26640-2;A2ABF4;A0A0G2JJT9;H0Y426	28;7;4;4;4	Valine--tRNA ligase	VARS	27.6	140.47	1264	0.88849	33	1.0222	33
O43865-2;Q96HN2-4;Q96HN2-3;H0Y8B3;O43865;Q96HN2-2;Q96HN2	1;1;1;1;1;1;1	Putative adenosylhomocysteinase 2;Putative adenosylhomocysteinase 3;Adenosylhomocysteinase	AHCYL1;AHCYL2	1.7	53.753	483	0.88835	2	0.94956	2
B4DY09;Q12905;X6R6Z1;A0A0A0MRL0	13;13;4;3	Interleukin enhancer-binding factor 2	ILF2	46.6	38.91	352	0.88819	32	0.37112	32
Q92688-2;Q92688	10;10	Acidic leucine-rich nuclear phosphoprotein 32 family member B	ANP32B	45.1	22.276	195	0.88808	15	0.92634	15
P06748-2;P06748;P06748-3;E5RI98;E5RGW4	11;11;10;3;2	Nucleophosmin	NPM1	49.4	29.464	265	0.88769	80	0.87398	80
Q14008-2;Q14008;Q14008-3	1;1;1	Cytoskeleton-associated protein 5	CKAP5	0.8	218.52	1972	0.887	2	0.89964	2
P08621;P08621-2;P08621-3;M0QYR1;P08621-4;M0QX04	13;12;8;7;5;2	U1 small nuclear ribonucleoprotein 70 kDa	SNRNP70	26.5	51.556	437	0.88677	36	0.86923	36
P35241;P35241-5;P35241-4;P35241-2;E9PNV3;P35241-3	17;17;13;6;4;4	Radixin	RDX	27.3	68.563	583	0.88665	9	1.0082	9
O43175;Q5SZU1	7;6	D-3-phosphoglycerate dehydrogenase	PHGDH	15.4	56.65	533	0.88617	11	1.0945	11
O60341;O60341-2;R4GMP9;R4GMQ1	3;3;2;1	Lysine-specific histone demethylase 1A	KDM1A	4.2	92.902	852	0.88492	3	0.72655	3
Q92841-1;Q92841-3;Q92841;H3BLZ8;Q92841-2	16;16;16;16;15	Probable ATP-dependent RNA helicase DDX17	DDX17	28.3	72.371	650	0.88487	12	0.92688	12
Q9H2U1-2;Q9H2U1;Q9H2U1-3;E7EWK3;A0A0G2JQU7;A0A0G2JRP3;H7C5F5;H7C514	14;14;13;11;5;4;2;1	Probable ATP-dependent RNA helicase DHX36	DHX36	17.2	113.15	994	0.88434	24	0.94145	24
Q9C0C9;K7ES11	8;5	Ubiquitin-conjugating enzyme E2 O	UBE2O	7.9	141.29	1292	0.88324	9	0.91845	9
Q9ULK4-4;Q9ULK4-5;Q9ULK4-3;Q9ULK4;Q5JWT2	2;2;2;2;2	Mediator of RNA polymerase II transcription subunit 23	MED23	1.5	155.55	1359	0.88302	2	0.84519	2
F8WAS3;C9IZN5;A0A087X1G1;H7BYD0;Q16718-2;Q16718	1;1;1;1;1;1	NADH dehydrogenase [ubiquinone] 1 alpha subcomplex subunit 5	NDUFA5	14.3	7.8423	70	0.8829	2	1.0428	2
O00625	2	Pirin	PIR	7.2	32.113	290	0.88284	2	0.9314	2
O60488-2;O60488;D6RF95;H0Y9A0	6;6;1;1	Long-chain-fatty-acid--CoA ligase 4	ACSL4	12.8	74.435	670	0.8827	5	0.97831	5
Q9NWU5;E7ESL0;A0A0C4DGX2;J3KQY1;Q9NWU5-2;Q9NWU5-3	5;5;5;5;4;4	39S ribosomal protein L22, mitochondrial	MRPL22	25.7	23.64	206	0.88247	5	0.80023	5
Q96Q11-2;Q96Q11;C9JRS7;Q96Q11-3;F8W8C3	12;12;2;1;1	CCA tRNA nucleotidyltransferase 1, mitochondrial	TRNT1	33.1	47.828	414	0.88159	11	0.89003	11
Q9H0S4-2;Q9H0S4	3;3	Probable ATP-dependent RNA helicase DDX47	DDX47	8.4	45.169	406	0.88123	3	0.94506	3
Q5JR04;Q9HCE1;Q9HCE1-2	2;2;1	Putative helicase MOV-10	MOV10	2.7	107.21	947	0.88104	3	0.76614	3
Q9P0L0;Q9P0L0-2;J3QKM9;E5RK64;O95292-2	5;5;1;1;1	Vesicle-associated membrane protein-associated protein A	VAPA	22.5	27.893	249	0.88076	6	1.0397	6
B8ZZV5;Q8TCC3-3;Q8TCC3;Q8TCC3-2	2;2;2;2	39S ribosomal protein L30, mitochondrial	MRPL30	20.8	11.935	101	0.88067	2	0.92404	2
P62249;M0R210;M0R3H0;A0A087WZ27;M0R1M5;Q6IPX4;M0QX76	9;7;6;6;5;4;3	40S ribosomal protein S16	RPS16	49.3	16.445	146	0.88013	21	0.71223	21
M0R248;Q13011;M0QZW4	4;4;1	Delta(3,5)-Delta(2,4)-dienoyl-CoA isomerase, mitochondrial	ECH1	16.9	29.139	267	0.88002	4	1.1345	4
E9PKG1;Q99873-3;Q99873-2;Q99873-4;Q99873;H7C2I1;E9PIX6;E9PQ98;E9PNR9;H0YDE4;A0A087X1W2;E9PMW9;E9PI83;Q9NR22-2;Q9NR22	12;12;12;12;12;12;9;8;7;7;6;2;2;2;2	Protein arginine N-methyltransferase 1	PRMT1	37.2	37.709	325	0.87928	18	0.78714	18
O43264-2;O43264;F5H3C1	2;2;1	Centromere/kinetochore protein zw10 homolog	ZW10	3.3	76.806	672	0.87901	2	1.0005	2
P51812;B1AXG1;E9PMM7;D6R910;B1AXG2;Q15418-3;B7Z3B5;Q15418-4;E9PGT3;Q15349;Q15418;Q15349-3;Q15418-2;Q9UK32-2;Q9UK32;Q15349-2;F2Z2J1	5;2;1;1;1;1;1;1;1;1;1;1;1;1;1;1;1	Ribosomal protein S6 kinase alpha-3	RPS6KA3	8.4	83.735	740	0.87806	10	1.0003	11
P23396;P23396-2;E9PL09;E9PPU1;F2Z2S8;H0YCJ7;H0YF32;H0YEU2;E9PQ96;E9PJH4;E9PSF4;E9PQX2;H0YES8;E9PJN9	17;15;14;12;11;11;9;9;7;7;4;3;1;1	40S ribosomal protein S3	RPS3	70.4	26.688	243	0.87805	27	0.69395	27
P30044-2;P30044;P30044-3;P30044-4	5;5;4;1	Peroxiredoxin-5, mitochondrial	PRDX5	41.4	17.031	162	0.87717	5	0.91785	5
O15355	9	Protein phosphatase 1G	PPM1G	19.6	59.271	546	0.87694	13	0.93196	13
Q5T0D2;P30085;P30085-2	2;2;1	UMP-CMP kinase	CMPK1	13.6	18.979	169	0.87638	3	1.0876	3
P46783;F6U211;S4R435;Q9NQ39	5;3;3;2	40S ribosomal protein S10	RPS10	29.1	18.898	165	0.87612	16	0.72026	16
P22695;H3BRG4;H3BSJ9;H3BP04;A0A087WVZ4;H3BUE4;H3BUI9	9;8;7;4;1;1;1	Cytochrome b-c1 complex subunit 2, mitochondrial	UQCRC2	25.8	48.442	453	0.87607	7	0.94322	7
Q99878;Q96KK5;Q9BTM1;Q16777;Q93077;Q7L7L0;Q6FI13;P20671;P0C0S8;P04908;H0YFX9;Q96QV6;P16104;Q9BTM1-2;Q71UI9-5;Q8IUE6	3;3;3;3;3;3;3;3;3;3;2;2;2;2;1;1	Histone H2A type 1-J;Histone H2A type 1-H;Histone H2A.J;Histone H2A type 2-C;Histone H2A type 1-C;Histone H2A type 3;Histone H2A type 2-A;Histone H2A type 1-D;Histone H2A type 1;Histone H2A type 1-B/E;Histone H2A;Histone H2A type 1-A;Histone H2A.x	HIST1H2AJ;HIST1H2AH;H2AFJ;HIST2H2AC;HIST1H2AC;HIST3H2A;HIST2H2AA3;HIST1H2AD;HIST1H2AG;HIST1H2AB;HIST1H2AA;H2AFX	27.3	13.936	128	0.87585	5	0.79103	5
O15042-3;O15042-2;O15042;E7ET15;H7C4V2	9;9;9;8;1	U2 snRNP-associated SURP motif-containing protein	U2SURP	16.6	72.523	620	0.87549	14	0.9335	14
P05387;H0YDD8	7;2	60S acidic ribosomal protein P2	RPLP2	77.4	11.665	115	0.87442	19	0.86847	19
P15880;H0YEN5;E9PQD7;E9PMM9;I3L404;E9PPT0;E9PM36;H3BNG3;H0YE27	12;11;8;7;6;6;6;1;1	40S ribosomal protein S2	RPS2	45.4	31.324	293	0.87421	22	0.70886	22
Q6UX04	1	Peptidyl-prolyl cis-trans isomerase CWC27 homolog	CWC27	2.5	53.846	472	0.87409	2	1.1085	2
Q8IZL8;E7EV54;C9JFV4	3;2;2	Proline-, glutamic acid- and leucine-rich protein 1	PELP1	4.5	119.7	1130	0.8733	4	0.85713	4
Q96ST2-2;Q96ST2-3;Q96ST2	2;2;2	Protein IWS1 homolog	IWS1	4.3	56.109	494	0.87323	4	0.82297	4
P22059;H0YCV6	3;1	Oxysterol-binding protein 1	OSBP	4.5	89.42	807	0.87301	3	0.9308	3
Q86VM9-2;Q86VM9;E7ERS3;H3BRN6;H3BP01	4;4;4;1;1	Zinc finger CCCH domain-containing protein 18	ZC3H18	5.8	84.099	757	0.87289	10	0.78704	10
Q9UBS4;H7C2Y5	3;1	DnaJ homolog subfamily B member 11	DNAJB11	9.8	40.513	358	0.87206	3	0.95449	3
P36776-3;K7EJE8;K7EKE6;P36776-2;P36776	2;2;2;2;2	Lon protease homolog, mitochondrial	LONP1	2.8	85.64	763	0.87205	2	0.94623	2
Q5JV98;Q9P289-2;H0Y630;Q8NBY1;B4DR80;Q9P289;Q9Y6E0-2;B4E0Y9;Q9Y6E0;Q5JV99;C9JDH9;C9J6L2;C9JCC0;C9J232;H7C279;O00506-3;O00506-2;Q9P289-3;O00506	2;2;2;2;2;2;2;2;2;1;1;1;1;1;1;1;1;1;1	Serine/threonine-protein kinase MST4;Serine/threonine-protein kinase 24;Serine/threonine-protein kinase 24 36 kDa subunit;Serine/threonine-protein kinase 24 12 kDa subunit;Serine/threonine-protein kinase 25	STK24;MST4;STK25	8.1	23.127	209	0.87178	2	0.84644	2
P10599;P10599-2	7;5	Thioredoxin	TXN	51.4	11.737	105	0.8715	9	1.0453	9
P18583-8;P18583-6;P18583-2;P18583-10;P18583-3;P18583-4;P18583-7;P18583;P18583-5;P18583-9;J3QSZ5	3;3;3;3;3;3;3;3;3;3;1	Protein SON	SON	5.4	73.883	699	0.87136	3	0.71848	3
O95573;F5GWH2	3;1	Long-chain-fatty-acid--CoA ligase 3	ACSL3	6.4	80.419	720	0.87045	3	0.85988	3
E9PRQ6;P24752-2;P24752	1;1;1	Acetyl-CoA acetyltransferase, mitochondrial	ACAT1	12.1	15.159	141	0.86955	2	1.1604	2
Q08257;A6NP24;Q08257-3;C9JH92;Q08257-2	6;5;5;4;2	Quinone oxidoreductase	CRYZ	22.8	35.206	329	0.86919	6	1.0757	6
P48507;P48507-2	3;2	Glutamate--cysteine ligase regulatory subunit	GCLM	14.2	30.727	274	0.86894	3	0.83216	3
P63244;J3KPE3;D6RAC2;H0Y8W2;H0YAF8;H0YAM7;D6REE5;D6RHH4;D6R9Z1;D6R9L0;D6RFX4;D6RF23;H0Y8R5;D6RBD0;D6RAU2;E9PD14;D6RFZ9;H0Y9P0;D6RGK8;D6RHJ5;D6R909;D6RDI0	18;16;14;14;13;13;13;11;10;10;9;7;7;7;6;6;6;5;3;3;3;1	Guanine nucleotide-binding protein subunit beta-2-like 1	GNB2L1	69.1	35.076	317	0.86831	36	0.67189	36
P55084-2;P55084;F5GZQ3;B5MD38;C9JEY0;C9JE81;C9K0M0	7;7;5;4;3;3;2	Trifunctional enzyme subunit beta, mitochondrial;3-ketoacyl-CoA thiolase	HADHB	16.4	48.879	452	0.86728	7	0.96221	7
B4DGU4;P35222;P14923;P35222-2;C9JTX4;C9J826;C9JK18;C9JKY1	4;4;2;1;1;1;1;1	Catenin beta-1;Junction plakoglobin	CTNNB1;JUP	5.2	84.765	774	0.86707	5	1.0964	5
P61956-2;P61956;Q6EEV6;P55854;A8MUA9;P55854-2;A8MU27	2;2;1;1;1;1;1	Small ubiquitin-related modifier 2;Small ubiquitin-related modifier 4;Small ubiquitin-related modifier 3	SUMO2;SUMO4;SUMO3	31	8.1111	71	0.86686	3	1.0429	3
Q8IXM3	4	39S ribosomal protein L41, mitochondrial	MRPL41	27.7	15.383	137	0.86686	3	0.80719	3
Q7KZ85;Q7KZ85-2;Q7KZ85-3	10;2;1	Transcription elongation factor SPT6	SUPT6H	6.8	199.07	1726	0.86618	10	0.91707	10
Q96HR9;A8MXN1;A8MWX0	3;2;2	Receptor expression-enhancing protein 6	REEP6	14.1	20.733	184	0.86604	3	1.1899	3
C9JQV0;Q9BRJ6;H7C0T1;H7C2R9	4;4;2;2	Uncharacterized protein C7orf50	C7orf50	35.9	21.883	192	0.86557	4	0.94339	4
E1CEI4;P48506;H0YAB6;H0Y9I7;A0A0C4DGB2	2;2;1;1;1	Glutamate--cysteine ligase catalytic subunit	GCLC	3	68.629	599	0.86552	2	0.92579	2
P38117;P38117-2;M0QY67	7;7;3	Electron transfer flavoprotein subunit beta	ETFB	32.5	27.843	255	0.86537	7	0.89444	7
P63151;P63151-2;E5RIY1	2;2;1	Serine/threonine-protein phosphatase 2A 55 kDa regulatory subunit B alpha isoform	PPP2R2A	5.1	51.691	447	0.86468	2	1.0958	2
F8W914;Q9NQC3-2;Q9NQC3-5;Q9NQC3;Q9NQC3-3;H7C106;Q9NQC3-4;Q9NQC3-6	5;5;5;5;4;4;4;4	Reticulon-4	RTN4	17.7	37.144	345	0.86466	4	0.9497	4
D6RH20;G5EA06;Q92552;Q92552-2;D6RJC7	2;2;2;2;1	28S ribosomal protein S27, mitochondrial	MRPS27	6.4	34.458	299	0.8645	4	0.74028	4
E9PDE8;O95757;D6RJ96	7;7;4	Heat shock 70 kDa protein 4L	HSPA4L	10.1	91.953	813	0.86398	3	0.99613	3
P05091;P05091-2;F8VP50;S4R3S4	8;6;3;2	Aldehyde dehydrogenase, mitochondrial	ALDH2	18	56.381	517	0.86398	6	0.9894	6
P43243;A8MXP9;D6REM6;D6R991;H0Y8T4;B3KM87;P43243-2;Q68E03;D6RAM9;D6RAY2;D6R8Z5;D6RBI2;D6RE02;D6RIA2;D6RB45;A0A0K0K1G4;D6R9F3;D6RBS2;D6RCM3;D6REK4;D6RBK5	18;18;16;13;8;7;7;3;2;2;2;2;2;2;1;1;1;1;1;1;1	Matrin-3	MATR3	26.4	94.622	847	0.86335	37	0.83045	37
C9J9K3;P08865;A0A0C4DG17;F8WD59	13;13;13;7	40S ribosomal protein SA	RPSA	64.6	29.404	263	0.8632	31	0.6833	31
O15020-2;O15020;A4QPE4	12;12;8	Spectrin beta chain, non-erythrocytic 2	SPTBN2	5	268.31	2365	0.86308	4	0.79071	4
M0R0F0;P46782;M0R0R2;M0QZN2	8;8;8;6	40S ribosomal protein S5;40S ribosomal protein S5, N-terminally processed	RPS5	36.5	22.391	200	0.86303	14	0.6703	14
Q9GZZ1-2;A0A087WWJ2;C9J5D1;E7EQ69;Q9GZZ1;C9J5J3;A0A0D9SF32;B0AZT5;F8WCK0;C9JZU6	3;3;3;3;3;2;2;2;1;1	N-alpha-acetyltransferase 50	NAA50	40.7	9.4647	81	0.86097	3	0.79174	3
P49257	2	Protein ERGIC-53	LMAN1	3.1	57.548	510	0.86015	2	0.91028	2
Q9NY33-4;Q9NY33;G3V1D3;G3V180;E9PQ14;E9PKK8;E9PPK9;Q9NY33-2;E9PQF2;E9PNX5	12;12;12;12;5;4;4;4;2;2	Dipeptidyl peptidase 3	DPP3	22.5	79.306	707	0.85916	17	0.957	17
P48735-2;P48735;H0YL11	3;3;1	Isocitrate dehydrogenase [NADP], mitochondrial	IDH2	6.2	45.179	400	0.85913	2	0.93349	2
Q9BR76;A0A087WW53;F5H390;F5H0D2;A9Z1Z3-3;A9Z1Z3	6;4;4;3;1;1	Coronin-1B;Coronin	CORO1B	11.9	54.234	489	0.85617	7	1.0003	7
Q9BZE1;S4R369;H0Y4J2;A6NHR2	2;2;1;1	39S ribosomal protein L37, mitochondrial	MRPL37	7.3	48.117	423	0.85593	4	0.87289	4
P14854;K7EQD3	2;1	Cytochrome c oxidase subunit 6B1	COX6B1	18.6	10.192	86	0.85464	2	0.98916	2
P16949;A2A2D0;P16949-2	7;5;5	Stathmin	STMN1	47	17.302	149	0.85429	9	0.98722	9
O95218-2;O95218;A0A0C4DGV5	7;7;7	Zinc finger Ran-binding domain-containing protein 2	ZRANB2	23.4	36.318	320	0.85327	17	0.90485	17
Q9ULC4;Q9ULC4-3;Q9ULC4-2	2;2;1	Malignant T-cell-amplified sequence 1	MCTS1	12.2	20.555	181	0.85114	2	1.1129	2
Q9BRP8-2;Q9BRP8	2;2	Partner of Y14 and mago	WIBG	17.2	22.704	203	0.85084	2	0.91801	2
H7BXH2;E9PKF6;Q5H9R7-6;Q5H9R7-2;Q5H9R7;Q5H9R7-5;Q5H9R7-3;Q5H9R7-4;E9PQP7;E9PK08;E9PNN8;H0YEN2;H0YEV0;H0YDW1	8;8;8;8;8;8;7;7;6;4;3;3;1;1	Serine/threonine-protein phosphatase 6 regulatory subunit 3	PPP6R3	11	92.407	827	0.85078	14	0.87484	14
F5H2U8;P52926;F5H2A4;P52926-3;P52926-6;P52926-4;P52926-5;P52926-2;F5H6H0	5;5;5;4;4;4;4;4;4	High mobility group protein HMGI-C	HMGA2	45.5	10.767	99	0.84691	6	0.96276	6
Q00688;G3V5F2	2;1	Peptidyl-prolyl cis-trans isomerase FKBP3	FKBP3	8.5	25.177	224	0.846	2	0.94531	2
Q01780-2;Q01780	5;5	Exosome component 10	EXOSC10	6	98.088	860	0.8454	7	0.95645	7
E7EMW7;O95071-2;O95071	2;2;2	E3 ubiquitin-protein ligase UBR5	UBR5	0.7	308.57	2792	0.84493	2	1.2595	2
P62750;H7BY10;K7EJV9;K7ERT8;A8MUS3;K7EMA7	9;8;8;8;8;5	60S ribosomal protein L23a	RPL23A	42.3	17.695	156	0.84482	25	0.72081	25
Q7L0Y3;C9JVB6	3;1	Mitochondrial ribonuclease P protein 1	TRMT10C	9.7	47.346	403	0.84421	6	0.95387	6
Q6PKG0-3;Q6PKG0;A0A0B4J210;H0YC33;Q659C4-7;Q659C4-6;Q659C4-5;E5RH50;Q659C4-2;Q659C4;Q659C4-9	5;5;3;2;2;2;2;2;2;2;1	La-related protein 1	LARP1	5.1	116.46	1019	0.84355	12	0.89614	12
O95394;O95394-3;O95394-4;A0A087WT27;J3KN95;D6RCD1;H0Y8I3;D6RC77;D6RCQ8;D6RF77;H0Y987	3;3;3;2;2;1;1;1;1;1;1	Phosphoacetylglucosamine mutase	PGM3	6.5	59.851	542	0.84346	3	1.0872	3
Q7Z7K0;H7C3D8	2;1	COX assembly mitochondrial protein homolog	CMC1	18.9	12.49	106	0.84158	4	1.0771	4
K7EM02;K7EIJ8;Q8IYT4-2;Q8IYT4	1;1;1;1	Katanin p60 ATPase-containing subunit A-like 2	KATNAL2	9.4	13.999	128	0.84117	2	0.83375	2
K7ERI7;P35268;K7EJT5;K7EP65;K7EKS7;K7ELC4;K7EMH1	3;3;2;2;2;2;2	60S ribosomal protein L22	RPL22	41.1	11.168	95	0.84086	5	0.71993	5
Q9UNI6;V9GY92;V9GYV5	3;2;1	Dual specificity protein phosphatase 12	DUSP12	11.2	37.687	340	0.8403	4	1.2607	4
Q5RKV6	2	Exosome complex component MTR3	EXOSC6	9.2	28.235	272	0.84002	2	0.94004	2
Q15181;Q5SQT6	4;2	Inorganic pyrophosphatase	PPA1	17	32.66	289	0.83933	3	1.0472	3
P40939;H0YFD6;P40939-2	12;5;2	Trifunctional enzyme subunit alpha, mitochondrial;Long-chain enoyl-CoA hydratase;Long chain 3-hydroxyacyl-CoA dehydrogenase	HADHA	19	82.999	763	0.83819	11	0.98057	11
Q14203-5;Q14203-2;Q14203-3;Q14203-4;E7EX90;Q14203-6;Q14203;E7EWF7;Q6AWB1	7;7;7;7;7;7;7;2;2	Dynactin subunit 1	DCTN1	7.2	126.73	1139	0.83742	6	0.94948	6
P09001;H0Y9G6;E7ETU7;D6RC14;E9PF06;D6RBQ5	3;3;3;2;2;1	39S ribosomal protein L3, mitochondrial	MRPL3	12.1	38.632	348	0.83536	3	0.86585	3
F8WBH5;Q14997	2;2	Proteasome activator complex subunit 4	PSME4	3.2	65.659	571	0.83272	2	0.71487	2
P31153;P31153-2;Q00266	3;2;1	S-adenosylmethionine synthase isoform type-2	MAT2A	8.9	43.66	395	0.83238	3	0.90311	3
P46781;A0A024R4M0;B5MCT8;C9JM19;F2Z3C0;A8MXK4	14;14;10;10;3;3	40S ribosomal protein S9	RPS9	46.4	22.591	194	0.83103	25	0.73391	25
P20962;F5H7R9;F5GXR3	2;1;1	Parathymosin	PTMS	22.5	11.53	102	0.83081	2	0.92542	2
K7EM56;A0A0B4J2B4;S4R417;K7EQJ5;P62841;K7ELC2;S4R456;K7EJ78	3;3;3;3;3;3;2;2	40S ribosomal protein S15	RPS15	23.2	12.99	112	0.83	8	0.74533	8
Q12792-4;F8VS81;Q12792;Q12792-3;D6RG15;Q6IBS0;H0Y858	2;2;2;2;1;1;1	Twinfilin-1;Twinfilin-2	TWF1;TWF2	7.9	28.823	252	0.82962	2	0.99726	2
Q8IYS1	6	Peptidase M20 domain-containing protein 2	PM20D2	15.4	47.776	436	0.82947	6	0.87137	6
P62263;H0YB22;E5RH77	6;5;5	40S ribosomal protein S14	RPS14	37.7	16.273	151	0.82712	14	0.75215	14
Q15427	1	Splicing factor 3B subunit 4	SF3B4	3.3	44.385	424	0.8258	2	0.88958	2
P49590;P49590-2;B4DQ67;D6RJE6;D6RB22	13;12;7;6;2	Probable histidine--tRNA ligase, mitochondrial	HARS2	26.7	56.888	506	0.82558	15	0.75708	15
P05388;P05388-2;F8VWS0;F8VU65;F8VPE8;G3V210;F8VW21;Q8NHW5;F8VQY6;F8VRK7;F8VZS0;F8VS58;F8VWV4;F8W1K8	9;8;8;7;6;6;6;6;5;5;5;4;3;2	60S acidic ribosomal protein P0;60S acidic ribosomal protein P0-like	RPLP0;RPLP0P6	43.2	34.273	317	0.82465	20	0.80727	20
I3L3P7;P62244;I3L246;H3BV27;H3BT37;I3L303;H3BVC7	6;6;4;2;2;2;1	40S ribosomal protein S15a	RPS15A	54	11.477	100	0.8242	14	0.73643	14
P62081;B5MCP9	8;6	40S ribosomal protein S7	RPS7	55.7	22.127	194	0.8238	13	0.665	13
Q9BTT0-3;Q9BTT0;E9PPH5;Q5TB19;E9PLC4;Q9BTT0-2	6;6;4;3;3;1	Acidic leucine-rich nuclear phosphoprotein 32 family member E	ANP32E	28.2	25.125	220	0.82335	9	0.91226	9
P39748;I3L3E9;P39748-2;F5H1Y3	4;3;3;1	Flap endonuclease 1	FEN1	13.9	42.592	380	0.82118	4	0.87067	4
P67809;A0A087X1S2;H0Y449;C9J5V9;Q9Y2T7	12;9;9;6;4	Nuclease-sensitive element-binding protein 1	YBX1	58	35.924	324	0.81991	38	0.62227	38
Q96ST3	5	Paired amphipathic helix protein Sin3a	SIN3A	4.7	145.17	1273	0.81859	4	0.85293	4
Q02539	6	Histone H1.1	HIST1H1A	28.8	21.842	215	0.81799	10	0.79619	10
H7C3U4;O75592-2;O75592	1;1;1	Probable E3 ubiquitin-protein ligase MYCBP2	MYCBP2	1.4	117.79	1061	0.81749	2	0.86441	2
Q9NP92;A0A087WV52	2;1	28S ribosomal protein S30, mitochondrial	MRPS30	6.2	50.364	439	0.81541	2	0.83834	2
P21127-12;P21127-4;P21127-5;P21127-10;P21127-6;P21127-9;J3QR29;P21127-8;A0A0D9SEI3;J3QKR5;P21127-3;P21127-2;B7ZVY7;A0A0D9SER5;A0A0D9SEN2;P21127;J3QR44;Q9UQ88-10;Q5QPR4;Q9UQ88-4;Q9UQ88-3;Q5QPR3;Q9UQ88-2;Q9UQ88;Q9UQ88-5;Q9UQ88-9;Q13882	10;10;10;10;10;10;10;10;10;10;10;10;10;10;10;10;10;9;9;9;9;9;9;9;8;7;1	Cyclin-dependent kinase 11B;Cyclin-dependent kinase 11A	CDK11B;CDC2L1;CDK11A	21.9	49.554	439	0.81441	14	0.83082	14
P34897-3;P34897;P34897-2;H0YIZ0;G3V2Y4;G3V5L0;G3V241;G3V3Y8;G3V4T0;G3V4X0;G3V2W0;G3V2E4;G3V540;G3V4W5	10;10;9;7;5;4;2;2;2;2;2;2;2;2	Serine hydroxymethyltransferase, mitochondrial;Serine hydroxymethyltransferase	SHMT2	23.8	53.454	483	0.81158	13	0.93903	13
P62805	6	Histone H4	HIST1H4A	50.5	11.367	103	0.80939	15	0.71248	15
P62280;M0QZC5;M0R1H6;M0R1H5	12;11;4;3	40S ribosomal protein S11	RPS11	55.1	18.431	158	0.80795	27	0.72525	27
Q9P0V9-3;E7EW69;Q9P0V9;E7EX04;Q9P0V9-2;B5ME97;F5GYV2;F5H1F2	2;2;2;2;2;2;1;1	Septin-10	2016-09-10	4.6	50.065	431	0.80782	2	0.95252	2
P49915;P49915-2	11;10	GMP synthase [glutamine-hydrolyzing]	GMPS	18.2	76.715	693	0.80758	11	1.0007	11
C9J4M6;C9J2Y9;P30876	13;13;13	DNA-directed RNA polymerase;DNA-directed RNA polymerase II subunit RPB2	POLR2B	12.8	125.19	1099	0.8075	14	0.88026	14
H0YLF3;F5H6I0;P61769	2;2;2	Beta-2-microglobulin;Beta-2-microglobulin form pI 5.3	B2M	28.2	8.4984	71	0.80705	5	1.0516	5
Q32P41	3	tRNA (guanine(37)-N1)-methyltransferase	TRMT5	6.7	58.246	509	0.80605	3	0.88478	3
Q96P11;Q96P11-2;Q96P11-4;Q96P11-5;Q63ZY6-4;Q63ZY6-5;Q63ZY6	3;3;3;2;1;1;1	Putative methyltransferase NSUN5	NSUN5	8.2	46.691	429	0.80579	4	0.95079	4
Q9NUQ6-2;F8W6C2;F8VZ02;C9JGM8;F2Z2S1;C9JKE4;F8VT91;C9JW67;C9IZC3;C9J8M7;Q4ZFW0;F8WAV0	9;5;4;4;3;3;3;3;2;2;1;1	SPATS2-like protein	SPATS2L	24.9	54.178	489	0.80117	2	1.0314	2
P31949	3	Protein S100-A11	S100A11	27.6	11.74	105	0.79956	6	1.0044	6
Q9Y2V2	2	Calcium-regulated heat stable protein 1	CARHSP1	18.4	15.892	147	0.79887	2	0.92916	2
P17812;P17812-2	3;1	CTP synthase 1	CTPS1	6.4	66.69	591	0.79826	3	1.0967	3
P62753;A2A3R7;A2A3R5	5;3;3	40S ribosomal protein S6	RPS6	22.9	28.68	249	0.79654	15	0.61736	15
Q15758;Q15758-3;Q15758-2;M0QXM4	2;1;1;1	Neutral amino acid transporter B(0)	SLC1A5	4.3	56.598	541	0.79487	4	1.0432	4
C9JP16;O75718	3;3	Cartilage-associated protein	CRTAP	6.4	41.432	358	0.79452	3	0.93052	3
P04792;F8WE04;C9J3N8	6;2;1	Heat shock protein beta-1	HSPB1	26.8	22.782	205	0.79311	8	0.99852	8
P62861;E9PR30	2;2	40S ribosomal protein S30	FAU	18.6	6.6478	59	0.79265	4	0.72472	4
Q9H3N1;G3V448	2;1	Thioredoxin-related transmembrane protein 1	TMX1	8.9	31.791	280	0.79257	2	1.2676	2
P07355;H0YMD0;H0YMU9;H0YN42;P07355-2;H0YKS4;H0YMM1;A6NMY6;H0YKZ7;H0YLV6;H0YMT9;H0YKX9;H0YKL9;H0YMW4;H0YNP5;H0YM50;H0YKV8;H0YMD9;H0YNB8;H0YKN4;H0YNA0;H0YN28;H0YL33;H0YN52;H0YLE2	13;12;12;12;12;11;10;10;8;8;8;8;7;7;7;7;6;5;4;4;4;4;4;3;2	Annexin A2;Annexin;Putative annexin A2-like protein	ANXA2;ANXA2P2	49.3	38.604	339	0.78929	19	0.88812	19
P10606	2	Cytochrome c oxidase subunit 5B, mitochondrial	COX5B	9.3	13.696	129	0.78852	4	0.99679	4
Q9UJS0;Q9UJS0-2;O75746-2;O75746;R4GN64	9;9;3;3;1	Calcium-binding mitochondrial carrier protein Aralar2	SLC25A13	17.2	74.175	675	0.78617	9	0.92581	9
Q01581;P54868-3;P54868-2;P54868	3;1;1;1	Hydroxymethylglutaryl-CoA synthase, cytoplasmic	HMGCS1	8.1	57.293	520	0.78567	4	0.9572	4
Q969Q0;R4GN19	6;3	60S ribosomal protein L36a-like	RPL36AL;RPL36A	28.3	12.469	106	0.78472	7	0.80438	7
A0A0A0MR02;P45880-2;P45880;P45880-1;A2A3S1;Q5JSD2;Q5JSD1	2;2;2;2;1;1;1	Voltage-dependent anion-selective channel protein 2	VDAC2	6.4	30.348	282	0.78471	4	1.0778	4
D6RG13;P61247;D6RAT0;D6RB09;E9PFI5;H0Y8L7;H0Y9Y4;D6RAS7;D6R9B6;D6RED7;D6RGE0;D6RI02	10;10;9;8;8;7;7;6;6;4;2;2	40S ribosomal protein S3a	RPS3A	48.4	25.608	223	0.78435	22	0.69232	22
H0YGG4;F5H0D0;Q14232-2;Q14232	2;2;2;2	Translation initiation factor eIF-2B subunit alpha	EIF2B1	15.8	16.816	152	0.78427	2	0.97415	2
K7ES61;Q9BYD3;K7EKI4;K7ELF1;K7ELQ0;Q9BYD3-2;X6RAY8	3;3;2;2;2;2;2	39S ribosomal protein L4, mitochondrial	MRPL4	14.7	33.792	300	0.78387	3	0.81346	3
Q9HCM4-2;Q9HCM4-4;Q9HCM4-3;Q9HCM4;Q9H329-2;Q9H329	2;2;2;2;1;1	Band 4.1-like protein 5;Band 4.1-like protein 4B	EPB41L5;EPB41L4B	3.2	57.885	505	0.78343	3	0.67841	3
E5RI99;P62888;E5RJH3;A0A0C4DH44;A0A0B4J213	7;7;3;3;2	60S ribosomal protein L30	RPL30	59.6	12.656	114	0.78326	19	0.79421	19
P00403	1	Cytochrome c oxidase subunit 2	MT-CO2	4.4	25.565	227	0.7819	2	0.87975	2
P62241;Q5JR95	10;9	40S ribosomal protein S8	RPS8	54.8	24.205	208	0.7815	22	0.69946	22
P62266;D6RD47;D6RDJ2;D6RIX0;D6R9I7	5;4;2;2;2	40S ribosomal protein S23	RPS23	29.4	15.807	143	0.78133	11	0.69268	11
O15479;Q9UBF1	3;1	Melanoma-associated antigen B2	MAGEB2	8.2	35.277	319	0.77828	4	1.1335	4
Q86TG7-2;A0A087WZG9;B4DSP0;A0A087WXK2;Q86TG7;A0A087WUL4;A0A087WX23	2;2;2;2;2;2;2	Retrotransposon-derived protein PEG10	PEG10;hCG_1642748	8	36.965	325	0.77781	3	0.71715	3
J3QT28;O43684-2;O43684	2;2;2	Mitotic checkpoint protein BUB3	BUB3	9	31.703	278	0.77745	3	0.79927	3
C9JXB8;C9JNW5;P83731	5;5;5	60S ribosomal protein L24	RPL24	39.7	14.369	121	0.7763	16	0.83604	16
Q86YQ8-2;Q9HCH3-2;Q96FN4-2;O75131;Q96FN4;E7ENV7;Q8IYJ1;Q96A23;O95741;Q9UBL6-2;Q86YQ8;Q96A23-2;Q9HCH3;O95741-2;Q9UBL6	1;1;1;1;1;1;1;1;1;1;1;1;1;1;1	Copine-8;Copine-5;Copine-2;Copine-3;Copine-9;Copine-4;Copine-6;Copine-7	CPNE8;CPNE5;CPNE2;CPNE3;CPNE9;CPNE4;CPNE6;CPNE7	3.9	25.664	233	0.77578	2	0.86615	2
Q9UPY3-2;Q9UPY3	9;9	Endoribonuclease Dicer	DICER1	5.4	208.45	1829	0.77427	13	0.64883	13
Q5F1R6;Q5F1R6-3;Q5F1R6-2	5;5;5	DnaJ homolog subfamily C member 21	DNAJC21	12.8	62.027	531	0.7722	3	0.69835	3
P62854;Q5JNZ5	3;2	40S ribosomal protein S26;Putative 40S ribosomal protein S26-like 1	RPS26;RPS26P11	31.3	13.015	115	0.76845	8	0.71444	8
E9PJA7;E9PK09;Q9NYF8-4;E9PQN2;E9PKI6;Q9NYF8-3;E9PK91;Q9NYF8-2;Q9NYF8;H0YF00	2;2;2;2;2;2;2;2;2;1	Bcl-2-associated transcription factor 1	BCLAF1	4.3	52.917	467	0.76565	5	0.69752	5
P21741-2;E9PPJ5;P21741;E9PLM6	1;1;1;1	Midkine	MDK	11.5	9.5122	87	0.76427	2	0.77174	2
P13798;C9JIF9;H7C393;C9JLK2;H7C1U0;F8WEH5	8;8;7;5;5;1	Acylamino-acid-releasing enzyme	APEH	12.3	81.224	732	0.75948	10	0.93707	10
Q9BYC8	2	39S ribosomal protein L32, mitochondrial	MRPL32	12.2	21.405	188	0.75919	2	0.81454	2
P83881;H0Y5B4;H7BZ11;J3KQN4;H7BY91;H0Y3V9	6;6;6;6;2;2	60S ribosomal protein L36a	RPL36A	28.3	12.441	106	0.75903	2	0.76284	2
P43366;O15481;Q96LZ2	7;2;2	Melanoma-associated antigen B1	MAGEB1	23.1	39.037	347	0.75855	8	1.0225	8
D6RAN4;P32969;H0Y9V9;E7ESE0;H0Y9R4	6;6;5;4;3	60S ribosomal protein L9	RPL9	34.3	20.775	181	0.7577	12	0.73917	12
Q53GS9-2;A0A087X1B2;Q53GS9;Q53GS9-3;B9A018	2;2;2;1;1	U4/U6.U5 tri-snRNP-associated protein 2	USP39	4.3	53.51	462	0.75756	2	1.0924	2
P62277;J3KMX5;E9PS50	8;6;3	40S ribosomal protein S13	RPS13	51	17.222	151	0.75652	18	0.68627	18
P56537;P56537-2;B7ZBH1;F8WD20;A0A0B4J1Y7;F8WDS6	8;4;3;1;1;1	Eukaryotic translation initiation factor 6	EIF6	56.7	26.599	245	0.75584	13	0.88805	13
P12277;H0YJG0;G3V4N7;G3V461;G3V2I1	9;4;4;2;1	Creatine kinase B-type	CKB	33.1	42.644	381	0.75411	17	1.0293	17
P62899;H7C2W9;C9JU56;B7Z4E3;P62899-3;P62899-2;B7Z4C8;B8ZZK4	5;4;4;4;4;4;4;3	60S ribosomal protein L31	RPL31	39.2	14.463	125	0.75393	11	0.72789	11
P63173;J3KT73;J3QL01;J3KSP2	5;4;4;3	60S ribosomal protein L38	RPL38	50	8.2178	70	0.75351	14	0.87615	14
E9PLL6;P46776;E9PJD9;E9PLX7	4;4;3;1	60S ribosomal protein L27a	RPL27A	38	12.201	108	0.74975	11	0.74361	11
P61313;E7EQV9;E7EX53;E7ENU7;P61313-2;E7ERA2	8;5;4;4;3;2	60S ribosomal protein L15;Ribosomal protein L15	RPL15	32.4	24.146	204	0.74912	8	0.75209	8
P62906	7	60S ribosomal protein L10a	RPL10A	32.7	24.831	217	0.74903	9	0.77171	9
O75165	5	DnaJ homolog subfamily C member 13	DNAJC13	2.3	254.41	2243	0.74829	3	1.1285	3
P16401	5	Histone H1.5	HIST1H1B	21.7	22.58	226	0.74802	12	0.88359	12
P62829;J3KTJ3;C9JD32;J3KT29;B9ZVP7;J3QQT9	5;3;3;3;2;1	60S ribosomal protein L23	RPL23	44.3	14.865	140	0.74714	11	0.79356	11
Q12906;Q12906-7;Q12906-5;Q12906-4;Q12906-2;Q12906-6;Q12906-3;K7EKJ9;K7EQR9;K7EKY0;K7ER69;K7EJ09;K7EQ75;K7EPG3;K7ERM6;K7ENK6;K7EM82	26;26;25;25;25;25;25;8;7;4;4;2;1;1;1;1;1	Interleukin enhancer-binding factor 3	ILF3	32	95.337	894	0.74534	93	0.32513	93
E5RIT6;Q9UNX3;E5RHH1	4;4;2	60S ribosomal protein L26-like 1	RPL26L1	21.1	15.207	128	0.74467	2	0.69015	2
F8W7C6;A0A087WV22;X1WI28;P27635;H7C123;H7C2C5;Q96L21;H7C2U2;B8A6G2;A6QRI9	6;6;6;6;5;5;3;1;1;1	60S ribosomal protein L10;60S ribosomal protein L10-like	RPL10;RPL10L	32.5	18.565	163	0.74413	14	0.72367	14
Q9BX68	2	Histidine triad nucleotide-binding protein 2, mitochondrial	HINT2	19	17.162	163	0.74183	2	0.83927	2
H3BS70;Q96DC0;P42126-2;P42126	2;2;2;2	Enoyl-CoA delta isomerase 1, mitochondrial	ECI1;DCI	9.4	24.704	224	0.74134	2	0.95326	2
P49207	4	60S ribosomal protein L34	RPL34	23.1	13.293	117	0.74124	9	0.72964	9
Q9H307-2;Q9H307	4;4	Pinin	PNN	8.9	67.005	584	0.74108	6	0.62007	6
P19525;P19525-2;C9JZT2;F8WBH4	18;17;5;4	Interferon-induced, double-stranded RNA-activated protein kinase	EIF2AK2	37.4	62.094	551	0.74046	20	0.12137	20
P62847-2;E7ETK0;P62847-3;A0A087WUS0;P62847;P62847-4	4;4;4;4;4;4	40S ribosomal protein S24	RPS24	30	15.069	130	0.73998	10	0.67973	10
P62701;C9JEH7;Q8TD47;P22090	15;6;6;6	40S ribosomal protein S4, X isoform	RPS4X	51	29.597	263	0.73949	21	0.67998	21
P09210;P08263;Q5JW84;Q5JW85;Q7RTV2;Q16772;A0A087WYQ6;A0A087WXM2	2;2;1;1;1;1;1;1	Glutathione S-transferase A2;Glutathione S-transferase A1;Glutathione S-transferase A1, N-terminally processed;Glutathione S-transferase;Glutathione S-transferase A5;Glutathione S-transferase A3	GSTA2;GSTA1;GSTA3;GSTA5	9	25.664	222	0.738	3	1.1478	3
Q6PGP7;D6RCE2	2;1	Tetratricopeptide repeat protein 37	TTC37	1.2	175.48	1564	0.73513	2	0.82937	2
P49748-2;P49748;P49748-3;G3V1M7;J3QRJ8;J3QKU9;K7EQP4	5;5;5;3;2;1;1	Very long-chain specific acyl-CoA dehydrogenase, mitochondrial	ACADVL	10.4	68.058	633	0.73458	4	0.89359	4
Q969S3	6	Zinc finger protein 622	ZNF622	14.9	54.271	477	0.73387	11	0.76958	11
Q86SX6	1	Glutaredoxin-related protein 5, mitochondrial	GLRX5	7	16.628	157	0.73316	2	0.98698	2
P61254;J3KTJ8;J3QRI7;J3QQQ9;J3QQV1;J3QRC4;J3KSS0	5;4;4;4;4;4;2	60S ribosomal protein L26	RPL26;KRBA2	24.1	17.258	145	0.73011	12	0.68374	12
F8VYK6;F8VZZ7;F8VP94;F8VYK3;Q15633-2;Q15633	1;1;1;1;1;1	RISC-loading complex subunit TARBP2	TARBP2	13.6	9.3606	88	0.72945	2	0.82137	2
P17174;P17174-2	2;1	Aspartate aminotransferase, cytoplasmic	GOT1	7.5	46.247	413	0.72467	2	0.66912	2
S4R3H4;E7EQT4;Q9UKV3-5;Q9UKV3	2;1;1;1	Apoptotic chromatin condensation inducer in the nucleus	ACIN1	2	145.44	1283	0.72377	3	0.76996	3
O75569-3;O75569-2;O75569;F8WEG8;G5E9Q4;C9JMM3	4;4;4;3;3;3	Interferon-inducible double stranded RNA-dependent protein kinase activator A	PRKRA	19.8	31.635	288	0.72175	4	0.87535	4
Q2M389;A0A087X256;F8W1W1;F8VYH7;Q2M389-2	6;6;3;2;2	WASH complex subunit 7	KIAA1033	5.8	136.4	1173	0.7202	3	0.89398	3
Q14684-2;Q14684	2;2	Ribosomal RNA processing protein 1 homolog B	RRP1B	2.8	82.175	740	0.71659	2	0.88903	2
M0R0A1;C9J4Z3;Q6P4E4;E9PEL3;M0R2L6;P61513;G5E9R3;A6NKH3	4;4;4;4;4;4;3;1	60S ribosomal protein L37a	RPL37A	48.3	6.793	60	0.7164	9	0.77322	9
P16403;P10412;P16402;P22492	6;6;6;2	Histone H1.2;Histone H1.4;Histone H1.3	HIST1H1C;HIST1H1E;HIST1H1D	16	21.364	213	0.71304	19	0.82933	19
Q59GN2;P62891	1;1	Putative 60S ribosomal protein L39-like 5;60S ribosomal protein L39	RPL39P5;RPL39	19.6	6.3225	51	0.71079	3	0.9125	3
P26373;J3QSB4;P26373-2;H3BTH3;J3KS98	6;4;4;1;1	60S ribosomal protein L13	RPL13	28.4	24.261	211	0.70946	11	0.70636	11
P40429;M0QYS1;Q8J015;Q6NVV1;M0QZU1;A0A096LPE0	6;5;4;2;1;1	60S ribosomal protein L13a	RPL13A;RPL13a	29.1	23.577	203	0.7081	8	0.74585	8
M0R3D6;M0R1A7;Q02543;M0R117;M0R0P7	8;8;8;7;6	60S ribosomal protein L18a	RPL18A	54.6	16.714	141	0.7036	15	0.72789	15
C9K025;P18077;F8WBS5;F8WB72	5;5;4;4	60S ribosomal protein L35a	RPL35A	44.7	10.645	94	0.70324	12	0.78622	12
P48449-2;P48449-3;P48449;C9J315;A0A0G2JQD0	2;2;2;1;1	Lanosterol synthase	LSS	3.7	74.217	652	0.69649	2	1.5106	2
P61353;K7ELC7;K7EQQ9;K7ERY7	5;4;3;1	60S ribosomal protein L27	RPL27	35.3	15.798	136	0.69482	10	0.75036	10
Q9Y3U8;J3QSB5;J3KTD3	4;2;1	60S ribosomal protein L36	RPL36	30.5	12.254	105	0.69417	6	0.75241	6
P30050;P30050-2	8;5	60S ribosomal protein L12	RPL12	64.2	17.818	165	0.69359	14	0.74606	14
P42766;F2Z388	3;2	60S ribosomal protein L35	RPL35	26	14.551	123	0.69206	9	0.68632	9
A0A087WXM6;J3QQT2;J3KRX5;P18621;P18621-3;A0A0A6YYL6;J3KRB3;A0A087WWH0;J3QS96;P18621-2;J3QLC8;A0A0A0MRF8;A0A087WY81;J3KSJ0	6;6;6;6;6;6;5;5;5;5;5;5;3;1	60S ribosomal protein L17	RPL17	40.2	19.586	169	0.68966	12	0.70233	12
J3QR09;J3KTE4;P84098;J3QL15	5;5;5;2	Ribosomal protein L19;60S ribosomal protein L19	RPL19	25.9	23.134	193	0.68951	7	0.74609	7
D3YTB1;P62910;F8W727	5;5;5	60S ribosomal protein L32	RPL32	39.1	15.616	133	0.68562	12	0.74467	12
P46778;G3V1B3;M0R181	3;2;2	60S ribosomal protein L21	RPL21	18.8	18.565	160	0.68377	7	0.74409	7
E9PKZ0;P62917;G3V1A1;E9PKU4;E9PP36	3;3;2;2;1	60S ribosomal protein L8	RPL8	17.1	22.389	205	0.68034	7	0.7488	7
P46779;P46779-2;P46779-3;H0YKD8;P46779-4;P46779-5;H0YLP6;H0YMF4	5;5;5;5;4;4;4;4	60S ribosomal protein L28	RPL28	35	15.747	137	0.67719	11	0.73737	11
P47914	2	60S ribosomal protein L29	RPL29	14.5	17.752	159	0.67717	4	0.70232	4
M0R3C3;Q9NZ01-2;Q9NZ01	1;1;1	Very-long-chain enoyl-CoA reductase	TECR	9.5	11.773	105	0.66734	3	0.79767	3
E9PI14;Q9NX20	2;2	39S ribosomal protein L16, mitochondrial	MRPL16	30.2	9.5822	86	0.66684	2	0.50795	2
Q8WU76-2;Q8WU76;A0A087WUD7	2;2;1	Sec1 family domain-containing protein 2	SCFD2	3.3	69.991	639	0.6616	2	0.80202	2
P62424;Q5T8U3;Q5T8U2	11;7;6	60S ribosomal protein L7a	RPL7A	37.2	29.995	266	0.65754	11	0.70855	11
P39023;G5E9G0;B5MCW2;H7C422;F8WCR1;H7C3M2;Q92901	9;8;6;5;3;3;1	60S ribosomal protein L3	RPL3	22.1	46.108	403	0.65688	19	0.65905	19
Q02878;F8VZ45;U3KQR5;F8VR69;F8VZA3;F8VWR1;F8VU16	9;3;3;2;1;1;1	60S ribosomal protein L6	RPL6	32.6	32.728	288	0.65358	18	0.71528	18
Q9NX58;D6RDJ1	9;1	Cell growth-regulating nucleolar protein	LYAR	29	43.614	379	0.65029	12	0.6195	12
Q07020;J3QQ67;Q07020-2;G3V203;H0YHA7;F8VYV2;F8VUA6;A0A075B7A0;F8VXR6	8;8;7;7;7;6;5;5;1	60S ribosomal protein L18	RPL18	42.6	21.634	188	0.649	14	0.7292	14
P18124;A8MUD9;C9JZ88;C9JIJ5	7;6;2;2	60S ribosomal protein L7	RPL7	35.5	29.225	248	0.64063	8	0.70125	8
E7EPB3;P50914	5;5	60S ribosomal protein L14	RPL14	41.9	14.558	124	0.62966	5	0.75785	5
P02771;J3KMX3	3;3	Alpha-fetoprotein	AFP	4.3	68.677	609	0.62813	2	0.8653	2
P36578;H3BM89;H3BTP7;H3BU31	16;12;5;5	60S ribosomal protein L4	RPL4	37	47.697	427	0.62265	25	0.67439	25
O95793-2;O95793-3;O95793;A0A087X1A5;Q5JW30;Q5JW28;F6UDC6;G5EA18;Q9NUL3-4;E5RJN7;E7EVI1;Q9NUL3-6;A0A0A0MTC4;Q9NUL3-8;A0A0A0MTD1;Q9NUL3-3;F8VPI7;E7EPX0;Q9NUL3-7;A0A0A0MTC6;E7EVJ4;Q9NUL3-2;E9PH62;Q9NUL3;A0A0A0MTC5	11;11;11;10;10;5;1;1;1;1;1;1;1;1;1;1;1;1;1;1;1;1;1;1;1	Double-stranded RNA-binding protein Staufen homolog 1	STAU1	25.4	54.933	496	0.62252	20	0.45216	20
P51991-2	18	Heterogeneous nuclear ribonucleoprotein A3	HNRNPA3	41	37.029	356	0.61885	2	0.90497	2
K7EMV3;K7EP01;B4DEB1;K7EK07;Q6NXT2;Q71DI3;Q5TEC6;Q16695;P84243;P68431;K7ES00	2;2;2;2;2;2;2;2;2;2;2	Histone H3;Histone H3.3C;Histone H3.2;Histone H3.1t;Histone H3.3;Histone H3.1	H3F3B;H3F3A;H3F3C;HIST2H3A;HIST2H3PS2;HIST3H3;HIST1H3A	17.4	10.334	92	0.60243	3	0.68094	3
Q14690	2	Protein RRP5 homolog	PDCD11	1.3	208.7	1871	0.5837	2	0.54322	2
C9J172;E9PEH1;E7EP63;E7ER52;A6NDI8;E7EPS2;Q9UBN7	1;1;1;1;1;1;1	Histone deacetylase 6	HDAC6	7.7	15.893	142	0.57952	2	0.84324	2
Q08211;Q08211-2	53;11	ATP-dependent RNA helicase A	DHX9	41.1	140.96	1270	0.57262	135	0.35379	135
P55265-5;P55265;P55265-4;P55265-3;H0YCK3;P55265-2	18;18;18;17;17;17	Double-stranded RNA-specific adenosine deaminase	ADAR	22.7	103.64	931	0.55932	38	0.40971	38
Q5T3R7;Q9BZE4-2;Q9BZE4	3;3;3	Nucleolar GTP-binding protein 1	GTPBP4	20.7	16.48	140	0.5508	3	0.58639	3
O95782-2;O95782;O94973-3;O94973;O94973-2;M0R2D9;E9PR62;A0A0G2JQM1;A0A0G2JS82	4;4;2;2;2;1;1;1;1	AP-2 complex subunit alpha-1;AP-2 complex subunit alpha-2	AP2A1;AP2A2	4	105.36	955	0.53038	3	0.5377	3
E7EP32;P62873-2;Q9HAV0;P62879;P62873;C9JD14;B1AKQ8;C9JZN1;F6X3N5;F6UT28;F5H8J8;F5H100;C9JIS1;P62879-2;B3KVK2;C9JXA5;F5H0S8;P16520-2;E9PCP0;P16520	2;2;2;2;2;1;1;1;1;1;1;1;1;1;1;1;1;1;1;1	Guanine nucleotide-binding protein G(I)/G(S)/G(T) subunit beta-1;Guanine nucleotide-binding protein subunit beta-4;Guanine nucleotide-binding protein G(I)/G(S)/G(T) subunit beta-2;Guanine nucleotide-binding protein G(I)/G(S)/G(T) subunit beta-3	GNB2;GNB1;GNB4;GNB3	6.8	32.408	296	0.48029	2	0.63199	2
P16989-2;P16989-3;P16989;A0A0D9SEI8	5;5;5;3	Y-box-binding protein 3	YBX3	19.5	31.947	303	0.43652	3	0.51951	3
P82664	2	28S ribosomal protein S10, mitochondrial	MRPS10	14.4	22.999	201	0.25635	2	0.22065	2
CON__ENSEMBL:ENSBTAP00000024146;P20742-2;P01023;P20742	3;1;1;1			2.2	164.34	1477	0.24302	2	0.39668	2
P02533;CON__P02533;CON__Q6IFX2	8;8;4	Keratin, type I cytoskeletal 14	KRT14	15.7	51.561	472	0.21118	3	0.1174	3
CON__Q922U2;CON__Q5XQN5	11;11			11.2	61.766	580	0.12257	2	NaN	0
P35908;CON__P35908	19;19	Keratin, type II cytoskeletal 2 epidermal	KRT2	28.6	65.432	639	0.095483	34	0.078021	29
P35527;CON__P35527;K7EQQ3	18;18;11	Keratin, type I cytoskeletal 9	KRT9	39.8	62.064	623	0.066597	36	0.030704	20
P13645;CON__P13645;CON__P02535-1;Q7Z3Y7;CON__Q148H6;CON__Q7Z3Y7;K7EMD9;P13646-2;Q7Z3Z0;CON__Q7Z3Z0;Q7Z3Y8;CON__Q7Z3Y8;Q2M2I5;CON__Q2M2I5	21;21;8;3;3;3;2;2;2;2;2;2;2;2	Keratin, type I cytoskeletal 10	KRT10	34.4	58.826	584	0.061305	63	0.049744	49
Q15058	1	Kinesin-like protein KIF14	KIF14	0.7	186.49	1648	0.049853	6	0.035856	3
CON__P00761	8			49.8	24.409	231	0.048476	62	0.0068973	46
A0A0A0MS07;P01859;A0A0G2JN06;P01861;A0A0G2JPD4;P01857;P01860;A0A075B6N8;A0A0A0MS08;A0A087X1C7;A0A0G2JNK4;A0A087X010;A0A087WV47;A0A087X079;A0A087WYE1;A0A087WYC5;A0A087WXL8;A0A087WVW2	1;1;1;1;1;1;1;1;1;1;1;1;1;1;1;1;1;1	Ig gamma-2 chain C region;Ig gamma-4 chain C region;Ig gamma-1 chain C region;Ig gamma-3 chain C region	IGHG2;IGHG4;IGHG1;IGHG3	2.4	31.983	295	0.04158	5	0.050904	5
K7EPJ8;K7ER75;K7EQ90;A0A087WZX7	4;3;2;2		AP1M1	37.6	14.54	125	0.039726	2	0.0017662	2
P04264;CON__P04264	28;27	Keratin, type II cytoskeletal 1	KRT1	44.4	66.038	644	0.030231	83	0.029926	65
Q08499-7;Q08499-12;Q08499-6	1;1;1			3.7	23.839	215	0.012225	2	0.071486	2

## Sheet: DENV1 and 3 Rep#2
Protein IDs	Peptide counts (all)	Protein names	Gene names	Sequence coverage [%]	Mol. weight [kDa]	Sequence length	DENV1 ratio	DENV1 ratio count	DENV3 ratio	DENV3 ratio count
Q9UN86-2;Q9UN86;D6RAC7;D6RB17;D6RGJ4;D6RBM9;D6REX8;D6RBR0;D6RE13;D6RBW8	7;7;3;3;2;1;1;1;1;1	Ras GTPase-activating protein-binding protein 2	G3BP2	19.4	50.817	449	7.8771	7	0.79429	7
E9PLA9;A0A087X082;Q14444-2;Q14444;G3V153	6;6;6;6;4	Caprin-1	CAPRIN1	32.8	20.236	186	4.5701	8	0.79994	8
Q14694;Q14694-3;Q14694-2;H3BNS8;H3BQP1;J3KT19	2;2;2;1;1;1	Ubiquitin carboxyl-terminal hydrolase 10	USP10	3.4	87.133	798	3.5106	2	0.89943	2
O75534-2;O75534;O75534-3;O75534-4;E9PLT0;E9PKN4;E9PLD4;E9PNG3	9;9;9;9;8;1;1;1	Cold shock domain-containing protein E1	CSDE1	11.9	85.746	767	2.7685	11	1.3637	11
Q96KR1;H0Y8W1	4;2	Zinc finger RNA-binding protein	ZFR	4.9	117.01	1074	2.5274	4	1.0799	4
Q9Y3F4;Q9Y3F4-2;H0YH33	7;7;4	Serine-threonine kinase receptor-associated protein	STRAP	23.1	38.438	350	2.5006	5	1.5241	5
Q6ZN17;Q6ZN17-2	6;3	Protein lin-28 homolog B	LIN28B	30.8	27.083	250	2.3256	6	3.0585	6
P10155-3;P10155-5;P10155-4;P10155;P10155-2	2;2;2;2;1	60 kDa SS-A/Ro ribonucleoprotein	TROVE2	5	58.482	518	2.2423	2	1.9499	2
Q9NUQ6-2;Q9NUQ6;Q4ZFW0;F8WAV0;C9IZC3;C9J8M7;F2Z2S1;C9JKE4;F8VZ02;F8VT91;C9JGM8;F8W6C2;A0A0A0MSG5;B8ZZZ7;Q9NUQ6-4;Q9NUQ6-3	2;2;1;1;1;1;1;1;1;1;1;1;1;1;1;1	SPATS2-like protein	SPATS2L;DKFZP564A2416	3.9	54.178	489	2.0619	2	1.5129	2
Q9UQ35;I3L3Q8;Q9UQ35-2	4;1;1	Serine/arginine repetitive matrix protein 2	SRRM2	1.9	299.61	2752	1.8073	4	1.3193	4
P26196;Q8IV96	3;1	Probable ATP-dependent RNA helicase DDX6	DDX6	6.8	54.416	483	1.7912	3	1.8639	3
Q00341-2;Q00341;A0A024R4E5;C9JHS7;C9JHZ8;C9JES8;C9JZI8;C9J5E5;C9JIZ1;H7C0A4;H0Y394	2;2;2;1;1;1;1;1;1;1;1	Vigilin	HDLBP	1.5	137.99	1235	1.787	2	2.2423	2
Q08J23-2;Q08J23;Q08J23-3	2;2;1	tRNA (cytosine(34)-C(5))-methyltransferase	NSUN2	2.9	82.392	732	1.7247	2	1.5813	2
Q2VIR3;P41091;Q2VIR3-2;F8W810	3;3;1;1	Putative eukaryotic translation initiation factor 2 subunit 3-like protein;Eukaryotic translation initiation factor 2 subunit 3	EIF2S3L;EIF2S3	8.7	51.228	472	1.692	3	1.2745	3
Q15020;Q15020-4;Q15020-2;F8VVK9;F8VZM2;F8W667;H0YHU8	17;16;5;3;3;3;2	Squamous cell carcinoma antigen recognized by T-cells 3	SART3	18.5	109.93	963	1.6865	18	1.7243	18
Q13283;E5RIZ6	4;1	Ras GTPase-activating protein-binding protein 1	G3BP1	9.2	52.164	466	1.619	5	1.0198	5
O43390;O43390-3;O43390-2;B4DT28;O43390-4	22;21;21;17;17	Heterogeneous nuclear ribonucleoprotein R	HNRNPR;HNRPR	37	70.942	633	1.5911	15	0.99416	15
M0QXS5;P14866;P14866-2;M0R1W6;B4DVF8;M0QYT0;M0R076;M0QYL7;H7C464;Q8WVV9-5;B7WPG3;Q8WVV9-4;C9IYN3;Q8WVV9;D6W592	9;9;8;4;3;3;2;2;1;1;1;1;1;1;1	Heterogeneous nuclear ribonucleoprotein L	HNRNPL	18.3	58.362	530	1.5231	9	1.3049	9
Q9P2J5;Q9P2J5-2;Q9P2J5-3;A0A087WXY1	7;6;4;2	Leucine--tRNA ligase, cytoplasmic	LARS	6.6	134.46	1176	1.4945	8	1.3461	8
Q9Y6M1-1;Q9Y6M1;F8W930;Q9Y6M1-5;Q9Y6M1-6;Q9Y6M1-3;Q9Y6M1-4	9;9;9;8;8;8;8	Insulin-like growth factor 2 mRNA-binding protein 2	IGF2BP2	20.7	61.842	556	1.4925	6	0.83146	6
Q15527	6	Surfeit locus protein 2	SURF2	32	29.647	256	1.4634	5	1.268	5
A0A087WYR0;P09132;A0A087WWU9;D6RBG4;P09132-2	4;4;2;1;1	Signal recognition particle 19 kDa protein	SRP19	44.2	13.654	120	1.4536	4	1.1849	4
Q99714;Q99714-2;Q5H928	5;4;3	3-hydroxyacyl-CoA dehydrogenase type-2	HSD17B10	24.9	26.923	261	1.4284	4	1.3145	4
D6R9P3;D6RD18;Q99729-3;D6RBZ0;A0A087WZV1;Q99729-2;Q99729-4;Q99729	7;7;7;7;7;7;6;6	Heterogeneous nuclear ribonucleoprotein A/B	HNRNPAB	25	30.302	280	1.4013	8	0.98567	8
Q12904;Q12904-2;D6R937	3;3;2	Aminoacyl tRNA synthase complex-interacting multifunctional protein 1;Endothelial monocyte-activating polypeptide 2	AIMP1	9	34.352	312	1.3857	3	1.0695	3
Q10570	4	Cleavage and polyadenylation specificity factor subunit 1	CPSF1	2.7	160.88	1443	1.3754	2	1.131	2
Q93008-1;Q93008;O00507-2;O00507	3;3;2;2	Probable ubiquitin carboxyl-terminal hydrolase FAF-X;Probable ubiquitin carboxyl-terminal hydrolase FAF-Y	USP9X;USP9Y	1.1	290.46	2554	1.3562	3	1.0885	3
Q9NSB2;CON__Q9NSB2;CON__Q6ISB0	5;5;5	Keratin, type II cuticular Hb4	KRT84	7.2	64.842	600	1.3197	2	1.0645	2
O14617-3;O14617-4;O14617-2;O14617;O14617-5	2;2;2;2;2	AP-3 complex subunit delta-1	AP3D1	2	111.24	984	1.3104	2	1.2095	2
P05787;CON__P05787;P05787-2;F8VUG2;CON__H-INV:HIT000292931;F8W1U3;CON__Q9H552;F8VP67;F8VRG4;CON__Q9DCV7;P08729;CON__Q3KNV1;CON__P08729;H7C5W5;B0YJC5;P41219;P17661;P41219-2;CON__REFSEQ:XP_092267	13;13;13;7;7;6;6;4;3;3;3;3;3;2;2;2;2;2;1	Keratin, type II cytoskeletal 8	KRT8	23.6	53.704	483	1.2947	21	1.1196	21
P30046-2;P30046;J3KQ18;A6NHG4;B5MC82	2;2;2;2;2	D-dopachrome decarboxylase;D-dopachrome decarboxylase-like protein	DDT;DDTL	18.7	11.323	107	1.285	2	1.1848	2
O60218;C9JRZ8	4;1	Aldo-keto reductase family 1 member B10	AKR1B10	12.3	36.019	316	1.2776	4	1.2538	4
P55769;B1AHD1	4;3	NHP2-like protein 1;NHP2-like protein 1, N-terminally processed	NHP2L1	32.8	14.173	128	1.2772	4	1.1652	4
P50990-2;P50990;P50990-3;H7C4C8;H7C2U0	6;6;5;3;1	T-complex protein 1 subunit theta	CCT8	12.7	57.645	529	1.2765	4	1.1572	4
P30101;H7BZJ3	3;1	Protein disulfide-isomerase A3	PDIA3	6.5	56.782	505	1.2729	3	1.2038	3
H0YLA2;P37108	5;5	Signal recognition particle 14 kDa protein	SRP14	39.1	13.058	115	1.2721	7	1.177	7
O00442;O00442-2	2;2	RNA 3-terminal phosphate cyclase	RTCA	5.5	39.336	366	1.2716	2	1.0676	2
Q14978;Q14978-3;A0A0A0MRM9;Q14978-2;S4R349;S4R402;S4R341	11;11;11;11;4;2;2	Nucleolar and coiled-body phosphoprotein 1	NOLC1	17.6	73.602	699	1.2667	13	1.1794	13
Q01081-2;Q01081;M0QYK5;Q01081-3;M0R2N4;Q8WU68-3;Q8WU68-2;Q8WU68;K7EJH3;K7EJM7;Q01081-4	3;3;2;2;2;2;2;2;1;1;1	Splicing factor U2AF 35 kDa subunit;Splicing factor U2AF 26 kDa subunit	U2AF1;U2AF1L4	11.7	27.882	240	1.265	3	1.2841	3
F2Z2Y6;O95777;C9JNV3	2;2;1	N-alpha-acetyltransferase 38, NatC auxiliary subunit	NAA38	29.9	7.3713	67	1.2637	3	1.3386	3
P62937;P62937-2;F8WE65;C9J5S7	3;2;2;2	Peptidyl-prolyl cis-trans isomerase A;Peptidyl-prolyl cis-trans isomerase A, N-terminally processed;Peptidyl-prolyl cis-trans isomerase	PPIA	17.6	18.012	165	1.249	3	1.1188	3
P49458;E9PE20;P49458-2	6;3;3	Signal recognition particle 9 kDa protein	SRP9	61.6	10.112	86	1.2407	5	1.064	5
H0Y804;B4DK69;S4R3Z2;Q04828;P52895;P42330;A0A0A0MSS8;A0A0A0MSD5;A0A0A0MT30;P52895-2;S4R3D5;S4R3P0;P42330-2;A6NHU4;P17516	2;2;2;2;2;2;2;2;2;1;1;1;1;1;1	Aldo-keto reductase family 1 member C1;Aldo-keto reductase family 1 member C2;Aldo-keto reductase family 1 member C3;Aldo-keto reductase family 1 member C4	AKR1C1;AKR1C2;AKR1C3;AKR1C4	6.9	28.067	248	1.2387	2	1.0031	2
O75369-5;O75369-4;O75369-6;O75369-3;O75369-2;O75369-9;O75369;O75369-8;E7EN95;O75369-7	20;20;20;20;20;20;20;20;17;17	Filamin-B	FLNB	10	230.29	2146	1.2364	17	1.026	17
P56192;H0YHL6;H0YI94;H0YI27;H0YIP0;H0YHV5;P56192-2	2;1;1;1;1;1;1	Methionine--tRNA ligase, cytoplasmic	MARS	2.3	101.11	900	1.2359	2	1.1233	2
P51991;P51991-2;H7C1J8	7;6;1	Heterogeneous nuclear ribonucleoprotein A3	HNRNPA3	25.1	39.594	378	1.234	8	1.3157	8
B4DJK0;B4DUA4;Q13243;G3V5K8;Q13243-2;Q13243-3	3;3;3;2;2;2	Serine/arginine-rich splicing factor 5	SRSF5	25.8	14.437	124	1.2326	2	1.1113	2
A0A087WWU8;Q5HYB6;P06753-5;P06753-2;Q5VU61;P06753-4;P06753-3;P06753-6;J3KN67;D6R904;P06753-7;P06753;D6RFM2;H0YL80;K7EP68;H0YKX5;H0YKP3;K7ERG3;K7ENT6;H0YNC7;P09493-2;P09493-5;F5H7S3;P67936;P07951-3;H7BYY1;H0YK48;H0YL52;B7Z596;Q5TCU3;P67936-2;P09493-9;P09493-8;P09493-7;P09493-6;P09493-4;P09493-3;P09493-10;P09493;P07951-2;P07951;CON__Q3SX28;Q5TCU8;Q6ZN40	4;4;4;4;3;3;3;3;3;2;2;2;1;1;1;1;1;1;1;1;1;1;1;1;1;1;1;1;1;1;1;1;1;1;1;1;1;1;1;1;1;1;1;1	Tropomyosin alpha-3 chain	DKFZp686J1372;TPM3	18.1	26.42	227	1.2296	3	1.5727	3
E9PCY5;Q02880-2;Q02880	2;2;2	DNA topoisomerase 2;DNA topoisomerase 2-beta	TOP2B	2.1	130.48	1150	1.2291	2	1.3442	2
E9PN91;E9PMW7;E9PPR1;E9PL12;E9PL71;E9PQ49;E9PI39;P29692-3;E9PK01;P29692;E9PIZ1;H0YCK7;A0A087X1X7;P29692-2;E9PRY8;E9PNW6;E9PKK3;E9PK72;E9PJD0;E9PK06;E9PQZ1;P29692-4	3;3;3;3;3;3;3;3;3;3;2;2;2;2;2;1;1;1;1;1;1;1	Elongation factor 1-delta	EEF1D	31.1	11.616	106	1.2269	3	1.2642	3
I6L9B1;O43491-2;E9PII3;O43491-3;E9PK52;O43491-4;E9PHY5;O43491;E9PJP4;E9PQN0;E9PRG1;E9PIG0;E9PQD2;B2RB02;Q9Y2J2-3;A8K968;Q9Y2J2-2;Q9Y2J2-4;A0A0A0MRA8;Q9Y2J2;J3QS55	14;14;14;14;14;14;14;14;2;2;2;2;2;2;2;2;2;2;2;2;1	Band 4.1-like protein 2	EPB41L2	25.6	71.642	633	1.2261	12	1.1673	12
O60506-2;O60506;O60506-4;O60506-3;B7Z645;O60506-5;F6UXX1	24;24;22;22;16;15;8	Heterogeneous nuclear ribonucleoprotein Q	SYNCRIP	39.1	65.681	588	1.2261	28	0.96223	28
P62312	3	U6 snRNA-associated Sm-like protein LSm6	LSM6	32.5	9.1275	80	1.2248	3	1.2275	3
X6R631;Q7Z7F7;Q7Z7F7-2	1;1;1	39S ribosomal protein L55, mitochondrial	MRPL55	27.3	6.8487	55	1.2226	2	1.0009	2
P00338;P00338-3;P00338-4;P00338-5;P00338-2;F5GYU2;F5GXY2;F5GXH2;F5GZQ4;F5H5J4;F5H6W8;F5H8H6;F5GXC7;F5GWW2;F5GXU1;F5H5G7;F5H155;A8MW50;A0A087WUM2;G3XAP5;F5H245;Q6ZMR3;P07864;P07195	9;9;7;6;6;4;4;3;2;2;2;1;1;1;1;1;1;1;1;1;1;1;1;1	L-lactate dehydrogenase A chain	LDHA	30.1	36.688	332	1.2211	9	1.1363	9
P13639	23	Elongation factor 2	EEF2	29.6	95.337	858	1.2169	15	1.5642	15
P07814;V9GYZ6;V9GZ76	27;20;1	Bifunctional glutamate/proline--tRNA ligase;Glutamate--tRNA ligase;Proline--tRNA ligase	EPRS	18.9	170.59	1512	1.2146	25	1.1345	25
A0A087WVV1;P49721	1;1	Proteasome subunit beta type-2	PSMB2	13.1	9.557	84	1.2141	2	1.1444	2
Q96SI9-2;Q96SI9;H0YC91	5;5;1	Spermatid perinuclear RNA-binding protein	STRBP	6.8	71.966	658	1.2082	3	0.7845	3
P06744;P06744-2;A0A0A0MTS2;A0A0J9YXP8;A0A0J9YX90;A0A0J9YYH3;K7EQ48;CON__Q3ZBD7	3;3;3;2;2;2;2;1	Glucose-6-phosphate isomerase	GPI	7.7	63.146	558	1.2079	4	1.1707	4
J3QL05;J3KP15;Q01130-2;Q01130;Q9BRL6-2;Q9BRL6	4;4;4;4;1;1	Serine/arginine-rich splicing factor 2	SRSF2	40	15.156	130	1.2056	4	1.0925	4
P84103-2;P84103;A0A087X2D0	5;5;4	Serine/arginine-rich splicing factor 3	SRSF3	41.1	14.203	124	1.2052	9	0.9569	9
P22626;P22626-2;A0A087WUI2	12;11;9	Heterogeneous nuclear ribonucleoproteins A2/B1	HNRNPA2B1	36	37.429	353	1.196	15	1.2218	15
A0A0A0MSX9;P41252;J3KR24;Q5TCC6;Q5TCD1	14;14;13;2;2	Isoleucine--tRNA ligase, cytoplasmic	IARS	12.7	142.29	1242	1.1956	12	1.2184	12
H0YLE8;P46940;A0A0J9YXZ5	2;2;1	Ras GTPase-activating-like protein IQGAP1	IQGAP1	1.9	124.79	1085	1.1896	2	1.1454	2
P13667	4	Protein disulfide-isomerase A4	PDIA4	6.2	72.932	645	1.1893	3	0.94191	3
O14979-3;O14979-2;A0A087WUK2;O14979	4;4;4;4	Heterogeneous nuclear ribonucleoprotein D-like	HNRPDL	19.3	27.191	244	1.1862	3	0.8359	3
P54136;P54136-2;E5RH09;E5RJM9	13;12;1;1	Arginine--tRNA ligase, cytoplasmic	RARS	22.3	75.378	660	1.1855	10	1.1427	10
P15531;P15531-2;E7ERL0;P22392;J3KPD9;P22392-2;Q32Q12;C9K028;F6XY72;E5RHP0;O60361	3;3;2;2;2;2;2;1;1;1;1	Nucleoside diphosphate kinase A;Nucleoside diphosphate kinase B;Nucleoside diphosphate kinase	NME1;NME2;NME1-NME2	20.4	17.149	152	1.183	2	1.0415	2
P04406;P04406-2;E7EUT5;O14556	7;6;5;1	Glyceraldehyde-3-phosphate dehydrogenase	GAPDH	26.6	36.053	335	1.181	6	1.0366	6
K7ENG2;P26368-2;P26368	5;5;5	Splicing factor U2AF 65 kDa subunit	U2AF2	21.2	33.901	307	1.1807	5	0.98401	5
P04080	2	Cystatin-B	CSTB	24.5	11.139	98	1.1795	3	1.0993	3
P52292;J3QLL0;J3KS65	2;1;1	Importin subunit alpha-1	KPNA2	4.2	57.861	529	1.1774	2	0.94898	2
Q86U42-2;Q86U42;B4DEH8;G3V4T2;Q92843-2;H0YJH9	4;4;3;3;3;2	Polyadenylate-binding protein 2	PABPN1	15.2	31.496	296	1.1753	4	1.3214	4
P40227-2;P40227	4;4	T-complex protein 1 subunit zeta	CCT6A	9.5	53.288	486	1.1646	3	1.1025	3
Q9Y490;H0YMT1;Q9Y4G6	10;2;2	Talin-1	TLN1	4.1	269.76	2541	1.1632	4	1.043	4
O00629;H7C4F6	5;3	Importin subunit alpha-3	KPNA4	16.5	57.886	521	1.163	5	1.177	5
P60709;P63261;G5E9R0;E7EVS6;I3L3I0;I3L1U9;P68133;P68032;C9JZR7;K7EM38;I3L3R2;J3KT65;P63267;P62736;C9JTX5;C9JUM1;I3L4N8;A6NL76;Q6S8J3;A5A3E0;F8WB63;B8ZZJ2;C9JFL5;F6UVQ4;F6QUT6;P63267-2;P0CG38;Q9BYX7;P0CG39;F8WCH0	11;10;7;7;7;7;7;7;6;6;6;6;6;6;5;5;5;5;5;5;4;4;4;4;4;4;4;3;3;2	Actin, cytoplasmic 1;Actin, cytoplasmic 1, N-terminally processed;Actin, cytoplasmic 2;Actin, cytoplasmic 2, N-terminally processed;Actin, alpha skeletal muscle;Actin, alpha cardiac muscle 1;Actin, gamma-enteric smooth muscle;Actin, aortic smooth muscle	ACTB;ACTG1;ACTA1;ACTC1;ACTG2;ACTA2	38.7	41.736	375	1.1627	21	0.99305	21
I3L397;Q6IS14;P63241;P63241-2;I3L504;F8WCJ1;C9J7B5;C9J4W5;Q9GZV4	2;2;2;2;2;1;1;1;1	Eukaryotic translation initiation factor 5A-1-like;Eukaryotic translation initiation factor 5A-1;Eukaryotic translation initiation factor 5A-2	EIF5A;EIF5AL1;EIF5A2	13.7	16.019	146	1.1564	2	1.1301	2
P47897-2;P47897;H7C0R3;C9J165;F2Z2V6	12;12;7;2;1	Glutamine--tRNA ligase	QARS	16.2	86.578	764	1.1563	7	1.1065	7
Q14315-2;Q14315	14;14	Filamin-C	FLNC	5.8	287.28	2692	1.1527	9	1.0816	9
Q9UQ80-2;Q9UQ80;F8VR77;H0YIN7;F8W0A3;F8VZ69	11;11;5;3;3;1	Proliferation-associated protein 2G4	PA2G4	37.4	38.059	340	1.1525	11	1.2946	11
P07900;P07900-2;G3V2J8;Q14568;Q58FG0	23;23;7;5;2	Heat shock protein HSP 90-alpha	HSP90AA1	31.1	84.659	732	1.1513	17	1.0863	17
Q7RTV0	3	PHD finger-like domain-containing protein 5A	PHF5A	21.8	12.405	110	1.1506	3	0.95734	3
O76094;O76094-2;D6RDY6;R4GNC1	15;14;7;6	Signal recognition particle subunit SRP72	SRP72	27.3	74.605	671	1.1462	13	1.1203	13
E9PP50;P23528;E9PLJ3;E9PS23;E9PQB7;Q9Y281-3;G3V1A4;Q9Y281;E9PK25	2;2;1;1;1;1;1;1;1	Cofilin-1;Cofilin-2	CFL1;CFL2	14.5	17.777	159	1.1429	2	1.0828	2
O43324-2;D6RBD7;C9J1V9;O43324;D6RCQ0;H0YAL7	3;3;3;3;2;2	Eukaryotic translation elongation factor 1 epsilon-1	EEF1E1;hCG_2043275	23	15.548	139	1.1343	3	1.2183	3
Q15393;Q15393-2;J3QL37;Q15393-3;J3QRB2	10;4;2;2;1	Splicing factor 3B subunit 3	SF3B3	9.5	135.58	1217	1.1321	6	0.88189	6
Q3BDU5;P02545-2;P02545-6;P02545-3;P02545;Q5TCI8;P02545-5;P02545-4;H0YAB0	10;10;10;10;10;7;7;7;4	Prelamin-A/C;Lamin-A/C	LMNA	22.4	55.637	487	1.1299	7	0.98879	7
O43707;O43707-2;O43707-3;F5GXS2;H7C144;P12814-2;P12814;P12814-3;P12814-4;H9KV75;P35609-2;P35609;Q08043;K7EJH8;G3V2W4;G3V2N5;A0A087WSZ2;K7EP19;G3V2X9;G3V2E8;G3V5M4;H0YJ11;H0YJW3;H7C5W8;F6THM6;D6RH00	35;24;20;20;13;10;10;10;10;8;6;6;6;5;4;4;4;3;3;2;2;2;2;2;2;1	Alpha-actinin-4	ACTN4	45.2	104.85	911	1.1248	34	1.0406	34
P09211;A8MX94;A0A087X243;A0A087X2E9	3;2;1;1	Glutathione S-transferase P	GSTP1	22.4	23.356	210	1.1242	3	1.1705	3
P07355;H0YMM1;H0YKS4;H0YMD0;H0YMU9;H0YN42;P07355-2;H0YKZ7;H0YLV6;H0YMT9;H0YKX9;A6NMY6;H0YKL9;H0YMW4;H0YKV8;H0YMD9;H0YNP5;H0YM50;H0YNB8;H0YKN4;H0YLE2;H0YN52;H0YNA0;H0YN28;H0YL33	9;8;8;8;8;8;8;7;7;7;7;7;6;6;5;4;4;4;3;3;1;1;1;1;1	Annexin A2;Annexin;Putative annexin A2-like protein	ANXA2;ANXA2P2	31.9	38.604	339	1.1203	8	1.2573	8
P46781;A0A024R4M0;B5MCT8;C9JM19	4;4;3;3	40S ribosomal protein S9	RPS9	18	22.591	194	1.1168	4	1.0388	4
P04075;J3KPS3;P04075-2;H3BQN4;H3BR68;H3BMQ8;H3BUH7;H3BR04;H3BPS8;H3BU78	6;6;6;5;3;3;3;3;3;2	Fructose-bisphosphate aldolase A;Fructose-bisphosphate aldolase	ALDOA	15.7	39.42	364	1.115	6	1.071	6
F8VZY9;P05783;CON__Q92764;C4AM86;Q92764;CON__Q497I4	11;11;2;2;2;2	Keratin, type I cytoskeletal 18	KRT18	25.6	43.774	391	1.1109	13	1.0053	13
Q15046;Q15046-2;H3BVA8;J3KRL2;H3BPV7;H3BRC9	12;11;5;4;3;1	Lysine--tRNA ligase	KARS	20.3	68.047	597	1.1096	11	1.1388	11
O00203-3;O00203;H0YBD0;Q13367-3;Q13367;Q13367-4	13;13;1;1;1;1	AP-3 complex subunit beta-1	AP3B1	13.2	116.19	1045	1.1046	12	1.1197	12
P14868;P14868-2;C9J7S3;C9JLC1;H7BZ35;C9JQM9;H7C278	13;11;5;5;5;3;2	Aspartate--tRNA ligase, cytoplasmic	DARS	27.5	57.136	501	1.1043	10	1.1711	10
Q5XKE5;CON__Q5XKE5	5;5	Keratin, type II cytoskeletal 79	KRT79	9.2	57.835	535	1.1025	2	1.1294	2
P78362;P78362-2;H7C5L6;H7C2I2;H7C521;Q9UPE1-2;A8MPP7;Q9UPE1-3;A8MPY5;Q9UPE1-4;Q9UPE1;E7ETV6;Q96SB4-4;Q96SB4;H3BLV9;Q96SB4-3;Q5R363	4;4;2;1;1;1;1;1;1;1;1;1;1;1;1;1;1	SRSF protein kinase 2;SRSF protein kinase 2 N-terminal;SRSF protein kinase 2 C-terminal	SRPK2	6.1	77.526	688	1.1011	3	1.0598	3
B4DLR8;P15559-3;P15559-2;P15559;H3BNV2;H3BRK3	4;4;4;4;3;3	NAD(P)H dehydrogenase [quinone] 1	NQO1	23.3	22.793	202	1.1002	4	1.1127	4
P14174	2	Macrophage migration inhibitory factor	MIF	17.4	12.476	115	1.0989	2	1.0222	2
P53999	3	Activated RNA polymerase II transcriptional coactivator p15	SUB1	26	14.395	127	1.0988	4	1.1343	4
P61604;B8ZZ54;B8ZZL8;S4R3N1	5;4;3;1	10 kDa heat shock protein, mitochondrial	HSPE1	52	10.932	102	1.0948	4	1.0875	4
P53621;P53621-2	9;8	Coatomer subunit alpha;Xenin;Proxenin	COPA	7.4	138.34	1224	1.0897	4	1.1198	4
Q9Y5B9;G3V5A4;G3V401;G3V2X0	11;1;1;1	FACT complex subunit SPT16	SUPT16H	10.9	119.91	1047	1.0887	7	1.182	7
Q16629-3;Q16629-2;A0A0B4J1Z1;Q16629-4;C9JAB2;Q16629	3;3;3;3;3;3	Serine/arginine-rich splicing factor 7	SRSF7	26.5	15.257	132	1.0877	2	1.1968	2
Q13200-3;Q13200;Q13200-2;H7C2Q3;H7C1H2	5;5;4;1;1	26S proteasome non-ATPase regulatory subunit 2	PSMD2	8.1	85.605	778	1.0869	5	1.0102	5
Q14204;H0YJ21	34;3	Cytoplasmic dynein 1 heavy chain 1	DYNC1H1	7.4	532.4	4646	1.0824	22	1.0265	22
Q7KZF4;H7C597	11;5	Staphylococcal nuclease domain-containing protein 1	SND1	12.9	102	910	1.0821	10	0.9954	10
G3V4F7;P61011-2;P61011	8;8;8	Signal recognition particle 54 kDa protein	SRP54	18.6	48.67	440	1.0815	8	1.0634	8
P84090;G3V279	2;1	Enhancer of rudimentary homolog	ERH	21.2	12.259	104	1.0814	2	1.1805	2
Q07955;J3KTL2;Q07955-3;Q07955-2;J3KSR8;J3QQV5;J3KSW7	6;6;5;5;3;2;2	Serine/arginine-rich splicing factor 1	SRSF1	26.2	27.744	248	1.0801	6	0.97666	6
P62263;H0YB22;E5RH77	2;1;1	40S ribosomal protein S14	RPS14	15.2	16.273	151	1.0781	5	0.99657	5
F8W1N5;F8VZJ2;F8VNW4;F8W0W4;H0YHX9;Q13765;E9PAV3-2;E9PAV3;F8VZ58;Q9BZK3	3;3;3;3;3;3;3;3;1;1	Nascent polypeptide-associated complex subunit alpha	NACA	59.2	7.813	71	1.076	4	1.157	4
Q13428-3;Q13428-8;Q13428-7;E7ETY2;Q13428;Q13428-4;Q13428-2;J3KQ96;Q13428-6;Q13428-5;H0YA99	17;16;16;16;16;16;15;15;15;13;1	Treacle protein	TCOF1	11.3	152.2	1489	1.0754	18	1.0083	18
P32119;A6NIW5	3;1	Peroxiredoxin-2	PRDX2	14.1	21.892	198	1.0753	3	1.1058	3
Q7L2E3-3;H7BXY3;Q7L2E3;Q7L2E3-2	11;11;11;11	Putative ATP-dependent RNA helicase DHX30	DHX30	9.6	129.44	1155	1.0751	6	1.0595	6
P25705-2;P25705;K7EK77;P25705-3;K7ENJ4;K7ERX7;K7EQH4;K7EJP1	6;6;4;4;3;3;2;2	ATP synthase subunit alpha, mitochondrial	ATP5A1	13.5	54.493	503	1.0744	3	1.0454	3
P27797;K7EJB9;K7EL50	7;4;1	Calreticulin	CALR	18.9	48.141	417	1.0721	7	1.0835	7
Q5HY54;Q60FE5;P21333-2;P21333;A0A087WWY3;F8WE98;H0Y5C6	15;15;15;15;14;7;1	Filamin-A	FLNA	6.3	276.55	2607	1.0711	9	1.0115	9
P07737;K7EJ44;CON__P02584;I3L3D5	5;3;2;2	Profilin-1	PFN1	42.9	15.054	140	1.0702	8	1.1015	8
P06733;P06733-2;K7EM90;F5H1C3;E5RI09;E5RG95;K7EPM1;K7EKN2;E5RGZ4;F5H0C8;P13929-3;P09104-2;P13929-2;P13929;P09104	9;7;3;1;1;1;1;1;1;1;1;1;1;1;1	Alpha-enolase	ENO1	25.8	47.168	434	1.0694	9	1.0117	9
P14625;Q96GW1;H0YIV0;F8W026;Q58FF3;F8VPC7	18;7;3;2;2;1	Endoplasmin	HSP90B1	25.4	92.468	803	1.0683	17	1.0474	17
Q7Z4V5-2;Q7Z4V5;K7EPS6;Q7Z4V5-4;Q7Z4V5-3;K7ERA4;A0A087WX58;A0A087WZ99	4;4;3;3;3;2;1;1	Hepatoma-derived growth factor-related protein 2	HDGFRP2	6.4	74.229	670	1.0663	4	0.98236	4
Q13151	6	Heterogeneous nuclear ribonucleoprotein A0	HNRNPA0	25.6	30.84	305	1.0631	6	1.499	6
P63104;E7EX29;E5RGE1;E5RIR4;E9PD24;E7EVZ2;B7Z2E6;H0YB80;E7ESK7;B0AZS6;P63104-2;P31947-2;P27348;Q04917;P31947;Q4VY20;A0A0J9YWZ2;B4DJF2;Q4VY19;I3L3T1;K7EM20;E9PG15;A0A0J9YWE8;A2IDB2	4;4;2;2;2;2;2;2;2;2;2;2;2;2;2;1;1;1;1;1;1;1;1;1	14-3-3 protein zeta/delta;14-3-3 protein sigma;14-3-3 protein theta;14-3-3 protein eta	YWHAZ;SFN;YWHAQ;YWHAH	18	27.745	245	1.0604	3	1.2256	3
P14618;P14618-3;P14618-2;H3BTN5;B4DNK4;H3BQ34;H3BUW1;H3BTJ2;H3BT25;H3BR70;H3BU13;H3BN34;H3BQZ3;P30613-2;P30613	16;14;14;13;12;10;8;8;7;4;2;1;1;1;1	Pyruvate kinase PKM;Pyruvate kinase	PKM	34.8	57.936	531	1.0585	10	0.9759	10
P00352;Q5SYQ7;Q5SYQ9;Q5SYQ8;H0Y2X5;O94788-4;P05091-2;O94788-2;H0YMG7;O94788-3;P47895;P30837;P05091;O94788	10;3;3;3;1;1;1;1;1;1;1;1;1;1	Retinal dehydrogenase 1	ALDH1A1	23.4	54.861	501	1.0579	9	1.0881	9
A6NJH9;P47813;O14602;X6RAC9	3;3;3;2	Eukaryotic translation initiation factor 1A, X-chromosomal;Eukaryotic translation initiation factor 1A, Y-chromosomal	EIF1AY;EIF1AX	22	14.455	127	1.0574	3	0.99633	3
Q14697;Q14697-2;F5H6X6;E9PKU7;E9PNH1	9;9;8;7;1	Neutral alpha-glucosidase AB	GANAB	11.1	106.87	944	1.0554	9	0.89827	9
P09382	4	Galectin-1	LGALS1	31.9	14.716	135	1.0516	4	0.99358	4
P46777;Q5T7N0	9;3	60S ribosomal protein L5	RPL5	36	34.362	297	1.0505	13	0.9579	13
Q5VTE0;P68104;P68104-2;A0A087WVQ9;A0A087WV01;Q05639;A6PW80;Q5JR01	7;7;6;6;5;5;3;3	Putative elongation factor 1-alpha-like 3;Elongation factor 1-alpha 1;Elongation factor 1-alpha 2	EEF1A1P5;EEF1A1;EEF1A2	19.9	50.184	462	1.0505	15	0.94281	15
H0YB39;E9PCY7;P31943;G8JLB6;H0YBG7;H0YBD7;P52597;P55795;E5RGH4;E5RGV0;E7EN40;D6RIU0;D6RBM0	3;3;3;3;2;2;2;2;1;1;1;1;1	Heterogeneous nuclear ribonucleoprotein H;Heterogeneous nuclear ribonucleoprotein H, N-terminally processed;Heterogeneous nuclear ribonucleoprotein F;Heterogeneous nuclear ribonucleoprotein F, N-terminally processed;Heterogeneous nuclear ribonucleoprotein H2;Heterogeneous nuclear ribonucleoprotein H2, N-terminally processed	HNRNPH1;HNRNPF;HNRNPH2	15.9	30.383	277	1.0447	3	1.1126	3
P62913-2;P62913;Q5VVC8;Q5VVC9	5;5;4;3	60S ribosomal protein L11	RPL11	26	20.124	177	1.0429	8	0.95768	8
P49327	27	Fatty acid synthase;[Acyl-carrier-protein] S-acetyltransferase;[Acyl-carrier-protein] S-malonyltransferase;3-oxoacyl-[acyl-carrier-protein] synthase;3-oxoacyl-[acyl-carrier-protein] reductase;3-hydroxyacyl-[acyl-carrier-protein] dehydratase;Enoyl-[acyl-carrier-protein] reductase;Oleoyl-[acyl-carrier-protein] hydrolase	FASN	11.7	273.42	2511	1.0424	21	0.94422	21
P07237;H7BZ94;I3L398;I3L312;H0Y3Z3;I3L4M2;I3L3P5;I3NI03;I3L1Y5;I3L514;I3L0S0;I3L3U6	8;7;5;4;4;3;2;2;1;1;1;1	Protein disulfide-isomerase	P4HB	15.6	57.116	508	1.0404	7	1.1066	7
Q9UHB9;Q9UHB9-4;Q9UHB9-2;Q9UHB9-3;K7EN53;K7EQC2	18;17;16;9;1;1	Signal recognition particle subunit SRP68	SRP68	35.7	70.729	627	1.0399	15	1.0577	15
P49588;P49588-2;H3BPK7	4;4;2	Alanine--tRNA ligase, cytoplasmic	AARS	4.8	106.81	968	1.0397	3	1.0552	3
H0YA96;H0Y8G5;Q14103-4;Q14103-3;Q14103-2;Q14103;D6RF44;D6RAF8;D6RBQ9;D6RD83	6;6;6;6;6;6;5;5;4;3	Heterogeneous nuclear ribonucleoprotein D0	HNRNPD	28.6	23.811	210	1.0386	11	0.85388	11
M0R0P1;M0R299;M0QXL5;M0R2Q4;P22087;M0R2U2;M0R1H0;M0R2B0;A6NHQ2	3;3;3;3;3;2;2;2;1	rRNA 2-O-methyltransferase fibrillarin	FBL	17.1	24.544	228	1.0373	3	1.1858	3
P08238;Q58FF7;Q58FF6;Q58FG1	24;9;4;1	Heat shock protein HSP 90-beta	HSP90AB1	33.4	83.263	724	1.0373	27	1.0324	27
P09651-3;F8W6I7;P09651-2;P09651;F8VZ49;Q32P51;F8VTQ5;F8W646;F8VYN5;H0YH80	11;11;11;11;9;8;7;6;4;4	Heterogeneous nuclear ribonucleoprotein A1;Heterogeneous nuclear ribonucleoprotein A1-like 2	HNRNPA1;HNRNPA1L2	50.9	29.386	267	1.0361	14	1.0648	14
Q9NTK5;J3KQ32;Q9NTK5-3;Q9NTK5-2;C9JTK6;C9JCJ9	16;16;10;9;6;3	Obg-like ATPase 1	OLA1	44.4	44.743	396	1.0344	28	0.9898	28
P12956;B1AHC9;P12956-2	8;7;6	X-ray repair cross-complementing protein 6	XRCC6	15.6	69.842	609	1.0327	7	0.99423	7
P60174-1;P60174;P60174-4;U3KPZ0;U3KQF3	4;4;3;2;1	Triosephosphate isomerase	TPI1	20.1	26.669	249	1.0317	3	0.98097	3
E9PP63;E9PKQ1;E9PP73;P53618	2;2;2;2	Coatomer subunit beta	COPB1	15.9	15.072	132	1.0314	2	1.3353	2
P26641;P26641-2	7;7	Elongation factor 1-gamma	EEF1G	19.7	50.118	437	1.0314	8	1.1201	8
E9PRK2;Q96I59;H0YEL9	3;3;2	Probable asparagine--tRNA ligase, mitochondrial	NARS2	13.7	27.205	241	1.0313	4	1.0971	4
O43143	5	Putative pre-mRNA-splicing factor ATP-dependent RNA helicase DHX15	DHX15	6.2	90.932	795	1.0312	3	0.94585	3
F8WAM2;Q99832-3;Q99832;Q99832-4	3;3;3;1	T-complex protein 1 subunit eta	CCT7	31.6	10.494	98	1.0304	3	0.89897	3
F5GY55;Q16531;F5GWI0;F5H2L3;F5GYG8;F5GZY8;Q16531-2	11;11;4;4;3;3;2	DNA damage-binding protein 1	DDB1	10	121.71	1092	1.0276	9	1.0658	9
P62314;J3QLI9;J3QLR7	4;3;1	Small nuclear ribonucleoprotein Sm D1	SNRPD1	37	13.281	119	1.0264	9	0.98106	9
P62304;A6NHK2	3;1	Small nuclear ribonucleoprotein E	SNRPE	38	10.803	92	1.0224	2	1.0196	2
B4DY09;Q12905;X6R6Z1;A0A0A0MRL0	10;10;4;3	Interleukin enhancer-binding factor 2	ILF2	35.2	38.91	352	1.0192	9	0.4664	9
Q00610-2;Q00610;A0A087WVQ6;J3KS13;K7EJJ5;A0A087WX41;P53675-2;P53675;J3KRF5	18;18;18;6;3;2;2;2;1	Clathrin heavy chain 1	CLTC	12.6	187.89	1639	1.0173	17	1.0315	17
P17844-2;P17844;J3KTA4;J3QSF1;J3KRZ1;Q92841-1;Q92841-3;Q92841;H3BLZ8;Q92841-2	7;7;7;3;3;3;3;3;3;2	Probable ATP-dependent RNA helicase DDX5	DDX5	12.5	60.563	535	1.0165	5	0.9136	5
F8VVM2;Q00325-2;Q00325;F8VZL5;F8VWR4;F8VWQ0	2;2;2;1;1;1	Phosphate carrier protein, mitochondrial	SLC25A3	6.2	36.161	324	1.0159	2	0.9622	2
Q08945;E9PPZ7;E9PMD4	5;1;1	FACT complex subunit SSRP1	SSRP1	7.3	81.074	709	1.0133	5	1.2294	5
Q01082;A0A087WUZ3;Q01082-3;Q01082-2;F8W6C1;A4QPE4;P11277-3;P11277;P11277-2;O15020-2;O15020;E9PJZ2	39;39;36;36;13;3;3;3;3;3;3;1	Spectrin beta chain, non-erythrocytic 1	SPTBN1	18.6	274.61	2364	1.0122	37	0.9456	37
P09012;M0QXK2;M0R221;M0R2B8;M0QZG7;M0R268;M0R0G9	5;4;4;4;4;4;3	U1 small nuclear ribonucleoprotein A	SNRPA	24.1	31.279	282	1.0117	4	1.1048	4
A0A0A0MSI0;Q06830;A0A0A0MRQ5;H7C3T4;Q13162	7;7;4;1;1	Peroxiredoxin-1	PRDX1	39.2	18.976	171	1.0085	7	0.96716	7
Q7Z2W4-3;Q7Z2W4-2;Q7Z2W4;C9J6P4	2;2;2;2	Zinc finger CCCH-type antiviral protein 1	ZC3HAV1	3.4	67.589	624	1.0073	2	0.79837	2
P08579	5	U2 small nuclear ribonucleoprotein B	SNRPB2	24	25.486	225	1.0062	3	0.97584	3
O60841;A0A087WUT6	16;16	Eukaryotic translation initiation factor 5B	EIF5B	15	138.83	1220	1.0038	13	0.95423	13
Q09666	9	Neuroblast differentiation-associated protein AHNAK	AHNAK	8.6	629.09	5890	1.0001	8	0.97756	8
P35579;P35579-2;Q5BKV1;A0A0C4DFM8;Q7Z406-5;Q7Z406-4;P35749-4;P35749-3;P35749;P35749-2;Q7Z406;Q7Z406-6;B1PS43;Q7Z406-2	9;5;1;1;1;1;1;1;1;1;1;1;1;1	Myosin-9	MYH9	4.9	226.53	1960	1	5	0.80668	5
P49411;H3BNU3	19;1	Elongation factor Tu, mitochondrial	TUFM	47.6	49.541	452	0.99998	35	1.0313	35
Q49AN9;F5H013;P62308;A8MWD9;C9JVQ0	2;2;2;2;1	Small nuclear ribonucleoprotein G;Small nuclear ribonucleoprotein G-like protein	SNRPG	29.7	7.1013	64	0.99212	3	0.99767	3
H3BQZ7;Q1KMD3	4;4	Heterogeneous nuclear ribonucleoprotein U-like protein 2	hCG_2044799;HNRNPUL2	5.1	84.69	746	0.99107	2	1.0986	2
Q9Y3E5;J3KQ48	2;2	Peptidyl-tRNA hydrolase 2, mitochondrial	PTRH2	19	19.193	179	0.9902	2	1.0584	2
B4DUR8;P49368-2;P49368;Q5SZX6	3;3;3;1	T-complex protein 1 subunit gamma	CCT3	6.6	55.674	500	0.98631	4	1.2763	4
A8MU58;F8W950;Q13155	2;2;2	Aminoacyl tRNA synthase complex-interacting multifunctional protein 2	AIMP2	8.7	26.76	242	0.9855	2	0.94202	2
G3V4W0;B4DY08;B2R5W2;G3V4C1;P07910-2;G3V2Q1;P07910;G3V576;P07910-4;G3V555;G3V575;P07910-3;P0DMR1;O60812;B7ZW38;B2RXH8;A0A0G2JPF8;A0A0G2JNQ3;G3V5X6;G3V3K6;G3V251;B4DSU6;G3V4M8;G3V5V7;G3V2D6;G3V2H6	11;11;11;11;11;11;11;10;10;7;7;7;7;7;7;7;7;7;6;6;6;6;5;5;5;4	Heterogeneous nuclear ribonucleoproteins C1/C2;Heterogeneous nuclear ribonucleoprotein C-like 1	HNRNPC;HNRNPCL1;LOC649330;LOC440563	38.5	28.916	262	0.98347	10	0.94469	10
P38646;D6RJI2;D6RA73;H0YBG6	8;3;2;1	Stress-70 protein, mitochondrial	HSPA9	14	73.68	679	0.98316	8	1.0117	8
Q9NR30-2;Q9NR30	2;2	Nucleolar RNA helicase 2	DDX21	3.1	79.656	715	0.98304	4	1.2599	4
P11021	16	78 kDa glucose-regulated protein	HSPA5	33.5	72.332	654	0.9828	13	0.97969	13
A6NLN1;P26599;P26599-2;P26599-3;K7ELW5;A0A0D9SF20;K7EKJ7;A0A087WUW5;K7ES59;X6R242;A0A087WU68;K7EK45;O95758-1;O95758-6;O95758-2;O95758;O95758-5;O95758-4	4;4;4;4;2;2;2;1;1;1;1;1;1;1;1;1;1;1	Polypyrimidine tract-binding protein 1	PTBP1	9.1	56.51	527	0.98256	4	0.80952	4
Q00839;Q00839-2;Q5RI18	19;17;5	Heterogeneous nuclear ribonucleoprotein U	HNRNPU	22.9	90.583	825	0.98059	36	0.97114	36
F8W1R7;P60660-2;P60660;J3KND3;G8JLA2;G3V1V0;B7Z6Z4;G3V1Y7;F8VPF3;F8VXL3;H0YI43;F8VZU9;F8W1I5;F8W180;P14649	3;3;3;3;3;3;3;2;2;1;1;1;1;1;1	Myosin light polypeptide 6	MYL6	20.7	16.29	145	0.97384	2	1.0248	2
P09661;H0YMA0;H0YKK0;H0YLR3	7;4;4;3	U2 small nuclear ribonucleoprotein A	SNRPA1	30.6	28.415	255	0.97349	8	0.96416	8
O00567;H0Y653;H0YDU4;Q5JXT2	2;1;1;1	Nucleolar protein 56	NOP56	4	66.049	594	0.97218	2	0.85774	2
Q8IYS1	2	Peptidase M20 domain-containing protein 2	PM20D2	4.1	47.776	436	0.96631	2	1.1564	2
P63272;D3DTZ5;J3QSB9;J3KSQ6;J3QR04	3;2;2;1;1	Transcription elongation factor SPT4	SUPT4H1	27.4	13.193	117	0.96309	3	0.89486	3
P62316;P62316-2;K7ERG4;K7EJB5	9;7;5;3	Small nuclear ribonucleoprotein Sm D2	SNRPD2	67.8	13.527	118	0.96134	14	0.96656	14
Q07021;I3L3Q7;I3L3B0	4;2;2	Complement component 1 Q subcomponent-binding protein, mitochondrial	C1QBP	16.7	31.362	282	0.96006	4	0.93199	4
P05455;E7ERC4;E9PGX9;E9PFL9	21;7;4;4	Lupus La protein	SSB	44.9	46.836	408	0.95762	36	0.91725	36
P11142;E9PKE3;P11142-2;E9PN89;E9PNE6;A8K7Q2;E9PLF4;P54652;E9PQQ4;E9PQK7;E9PK54;E9PI65;E9PPY6;E9PN25;E9PM13;E9PS65	21;20;16;13;13;10;9;9;8;8;8;7;6;5;5;5	Heat shock cognate 71 kDa protein	HSPA8	36.8	70.897	646	0.95714	20	1.0208	20
M0R3F1;Q9BUJ2-4;A0A0A0MRA5;B7Z4B8;Q9BUJ2-2;Q9BUJ2;M0QYZ0;Q9BUJ2-3;M0QYM5;M0QYI8	6;6;6;6;6;6;4;4;1;1	Heterogeneous nuclear ribonucleoprotein U-like protein 1	HNRNPUL1	11.7	71.611	641	0.95645	6	1.0975	6
P98179	2	Putative RNA-binding protein 3	RBM3	17.8	17.17	157	0.95579	2	0.85464	2
Q09161	2	Nuclear cap-binding protein subunit 1	NCBP1	2.7	91.838	790	0.95542	2	1.1404	2
P62318-2;P62318;H3BT13	3;3;1	Small nuclear ribonucleoprotein Sm D3	SNRPD3	33.3	13.291	120	0.9546	8	0.98013	8
P26038;P35241;P15311;E7EQR4;P35241-5;V9GZ54;E9PQ82;E9PNV3;P35241-3;P35241-4	2;2;2;2;2;1;1;1;1;1	Moesin;Radixin;Ezrin	MSN;RDX;EZR	2.8	67.819	577	0.95242	2	1.1061	2
P55072;C9JUP7;C9IZA5	26;4;4	Transitional endoplasmic reticulum ATPase	VCP	39.1	89.321	806	0.94693	41	0.99716	41
Q71UM5;H0YMV8;C9JLI6;C9J1C5	3;3;2;1	40S ribosomal protein S27-like;40S ribosomal protein S27	RPS27L	38.1	9.4771	84	0.94678	2	1.1669	2
J3QS39;J3QTR3;F5H6Q2;P62987;F5GYU3;F5H2Z3;F5H265;B4DV12;F5H388;P62979;F5H747;F5GXK7;J3QKN0;Q5PY61;P0CG47;Q96C32;P0CG48;M0R1V7;M0R1M6;M0R2S1;J3QSA3;F5GZ39	4;4;4;4;4;4;4;4;4;4;4;4;4;4;4;4;4;3;3;3;2;2	Ubiquitin-60S ribosomal protein L40;Ubiquitin;60S ribosomal protein L40;Ubiquitin-40S ribosomal protein S27a;Ubiquitin;40S ribosomal protein S27a;Polyubiquitin-B;Ubiquitin;Polyubiquitin-C;Ubiquitin	UBB;RPS27A;UBC;UBA52	46.2	10.469	93	0.94665	10	0.88636	10
Q6P2Q9;I3L0J9;I3L3Z8	24;9;1	Pre-mRNA-processing-splicing factor 8	PRPF8	10.3	273.6	2335	0.94656	18	0.86202	18
P10809;E7ESH4;C9JL19;C9JCQ4;P10809-2;C9JL25;E7EXB4	9;2;1;1;1;1;1	60 kDa heat shock protein, mitochondrial	HSPD1	17.5	61.054	573	0.94651	5	1.013	5
P19338;H7BY16;C9JYW2;C9JLB1;C9J1H7;C9JWL1	29;17;4;4;4;4	Nucleolin	NCL	34.8	76.613	710	0.94421	67	0.90237	67
P62306;A0A0B4J254;F8W0W6	5;2;2	Small nuclear ribonucleoprotein F	SNRPF	40.7	9.7251	86	0.94392	5	0.9463	5
P62750;H7BY10;K7EJV9;K7ERT8;A8MUS3;K7EMA7	4;4;4;4;4;3	60S ribosomal protein L23a	RPL23A	25.6	17.695	156	0.94308	8	1.0281	8
P62805	3	Histone H4	HIST1H4A	27.2	11.367	103	0.9426	4	1.0101	4
H0YH81;P06576;F8W0P7;F8W079	5;5;2;2	ATP synthase subunit beta;ATP synthase subunit beta, mitochondrial	ATP5B	18.5	38.138	362	0.94147	5	0.93676	5
O75643;O75643-2;B4E0P5	38;11;7	U5 small nuclear ribonucleoprotein 200 kDa helicase	SNRNP200	18.4	244.5	2136	0.94053	31	0.82889	31
A0A087WUN7;H0YJ40;G3V4X6;Q9GZT3-2;Q9GZT3;G3V2S9;H0YJI1;H0YJ07;H0YJU7;H0YJW7	2;2;2;2;2;2;1;1;1;1	SRA stem-loop-interacting RNA-binding protein, mitochondrial	SLIRP	21.7	10.353	92	0.93846	2	0.88729	2
P68363;P68363-2;P68366-2;P68366;F8VVB9;F8VQQ4;F8VRZ4;F8VS66;F8VX09;F8VWV9;C9JDS9;A6NHL2-2;A6NHL2;C9K0S6;F8VRK0;C9JDL2;C9JEV8;C9JQ00;C9JJQ8;F8VXZ7;F8W0F6;Q9H853	15;13;11;11;9;6;5;5;4;4;4;3;3;2;2;2;2;2;2;1;1;1	Tubulin alpha-1B chain;Tubulin alpha-4A chain	TUBA1B;TUBA4A	43.2	50.151	451	0.93833	29	0.96512	29
J3QLE5;P14678-2;P63162;P14678;P63162-2;A8MT02;P14678-3;J3KRY3;S4R3P3	6;6;6;6;6;6;6;3;3	Small nuclear ribonucleoprotein-associated proteins B and B;Small nuclear ribonucleoprotein-associated protein N	SNRPN;SNRPB	30.2	17.546	169	0.93514	4	0.89577	4
Q9Y265-2;Q9Y265;E7ETR0	4;4;2	RuvB-like 1	RUVBL1	11.9	42.126	386	0.93481	3	1.0261	3
Q9UQ88-5;Q9UQ88-10;P21127-12;P21127-4;P21127-5;P21127-10;P21127-6;Q5QPR4;P21127-9;J3QR29;Q9UQ88-4;P21127-8;A0A0D9SEI3;Q9UQ88-3;Q5QPR3;Q9UQ88-2;J3QKR5;P21127-3;P21127-2;B7ZVY7;Q9UQ88;A0A0D9SER5;A0A0D9SEN2;P21127;J3QR44;Q9UQ88-9;Q13882	5;5;5;5;5;5;5;5;5;5;5;5;5;5;5;5;5;5;5;5;5;5;5;5;5;3;1	Cyclin-dependent kinase 11A;Cyclin-dependent kinase 11B	CDK11A;CDK11B;CDC2L1	12.8	45.229	397	0.93413	3	1.0913	3
C9J712;P35080;C9J0J7;C9JQ45;P35080-2;G5E9Q6	2;2;1;1;1;1	Profilin-2;Profilin	PFN2	24.2	9.7982	91	0.93394	2	0.91608	2
Q58FF8	6	Putative heat shock protein HSP 90-beta 2	HSP90AB2P	15.7	44.348	381	0.933	2	0.95854	2
Q96Q11-2;Q96Q11;Q96Q11-3;C9JRS7;F8W8C3	4;4;1;1;1	CCA tRNA nucleotidyltransferase 1, mitochondrial	TRNT1	10.4	47.828	414	0.92995	3	0.99269	3
K7EM02;K7EIJ8;Q8IYT4-2;Q8IYT4	1;1;1;1	Katanin p60 ATPase-containing subunit A-like 2	KATNAL2	9.4	13.999	128	0.92912	2	0.92945	2
P13010;C9JZ81	5;1	X-ray repair cross-complementing protein 5	XRCC5	6.8	82.704	732	0.92863	4	1.0688	4
Q99880;Q99879;Q99877;Q93079;Q5QNW6;P62807;P58876;P57053;O60814;B2R4S9;Q5QNW6-2;U3KQK0;Q16778;P33778;P23527;P06899;Q8N257;Q96A08	5;5;5;5;5;5;5;5;5;5;5;5;4;4;4;4;3;3	Histone H2B type 1-L;Histone H2B type 1-M;Histone H2B type 1-N;Histone H2B type 1-H;Histone H2B type 2-F;Histone H2B type 1-C/E/F/G/I;Histone H2B type 1-D;Histone H2B type F-S;Histone H2B type 1-K;Histone H2B;Histone H2B type 2-E;Histone H2B type 1-B;Histone H2B type 1-O;Histone H2B type 1-J;Histone H2B type 3-B;Histone H2B type 1-A	HIST1H2BL;HIST1H2BM;HIST1H2BN;HIST1H2BH;HIST2H2BF;HIST1H2BC;HIST1H2BD;H2BFS;HIST1H2BK;HIST1H2BI;HIST2H2BE;HIST1H2BB;HIST1H2BO;HIST1H2BJ;HIST3H2BB;HIST1H2BA	40.5	13.952	126	0.92343	6	1.1726	6
P42677;Q5T4L4	4;3	40S ribosomal protein S27	RPS27	39.3	9.461	84	0.92324	4	1.0713	4
Q15029-2;Q15029-3;Q15029;K7EP67;K7EJ74	11;11;11;5;3	116 kDa U5 small nuclear ribonucleoprotein component	EFTUD2	13.3	105.38	937	0.92042	8	0.97878	8
Q96EL3	2	39S ribosomal protein L53, mitochondrial	MRPL53	20.5	12.107	112	0.91817	2	0.98628	2
D6RAN4;H0Y9V9;P32969;E7ESE0;H0Y9R4	3;3;3;2;1	60S ribosomal protein L9	RPL9	17.1	20.775	181	0.918	4	1.002	4
O15371-2;O15371-3;O15371;B0QYA5;B0QYA4;B0QYA8;B0QYA6	4;4;4;2;1;1;1	Eukaryotic translation initiation factor 3 subunit D	EIF3D	9	58.14	499	0.91719	3	0.91204	3
P11387;E5RIC7;Q969P6-2;Q969P6	4;1;1;1	DNA topoisomerase 1	TOP1	5.1	90.725	765	0.91358	4	0.90291	4
Q9BTT0-3;Q9BTT0;E9PPH5;Q5TB19;E9PLC4;Q9BTT0-2	5;5;4;2;2;1	Acidic leucine-rich nuclear phosphoprotein 32 family member E	ANP32E	28.2	25.125	220	0.91336	5	1.0922	5
P09327;B4DV78;P09327-2;H7C0B6;C9J2B5;O75366-2;O75366	9;5;4;2;1;1;1	Villin-1	VIL1	12.5	92.694	827	0.91258	9	0.96635	9
P12270;P12270-2	8;3	Nucleoprotein TPR	TPR	3.5	267.29	2363	0.91197	4	0.87412	4
P05388;P05388-2;F8VWS0;F8VU65;F8VPE8;G3V210;F8VW21;Q8NHW5;F8VQY6;F8VRK7;F8VZS0;F8VS58;F8VWV4;F8W1K8	9;8;8;7;6;6;6;6;5;5;5;4;3;2	60S acidic ribosomal protein P0;60S acidic ribosomal protein P0-like	RPLP0;RPLP0P6	43.2	34.273	317	0.90957	9	1.0207	9
Q13247-3;Q13247;Q13247-2;A0A0D9SEM4;Q08170	5;5;2;1;1	Serine/arginine-rich splicing factor 6	SRSF6	11.6	38.418	335	0.90901	6	1.0666	6
H0YN26;P39687;H7BZ09;O95626;O43423	11;11;2;2;2	Acidic leucine-rich nuclear phosphoprotein 32 family member A	ANP32A	50.3	19.997	177	0.90887	12	0.95359	12
Q96FJ2;P63167	2;2	Dynein light chain 2, cytoplasmic;Dynein light chain 1, cytoplasmic	DYNLL2;DYNLL1	24.7	10.35	89	0.90745	3	1.033	3
P63173;J3KT73;J3QL01;J3KSP2	6;5;5;3	60S ribosomal protein L38	RPL38	50	8.2178	70	0.90728	6	1.0228	6
Q5JNZ5;P62854	1;1	Putative 40S ribosomal protein S26-like 1;40S ribosomal protein S26	RPS26P11;RPS26	7.8	13.002	115	0.90293	2	0.91321	2
P24928;A0A0C4DGZ0;A0A087WWE2;P24928-2	3;3;3;1	DNA-directed RNA polymerase II subunit RPB1	POLR2A	1.8	217.17	1970	0.90278	3	0.71464	3
P26640;A2ABF4;A0A0G2JJT9;H0Y426	5;2;2;1	Valine--tRNA ligase	VARS	4.6	140.47	1264	0.90276	4	0.9872	4
O15372;B3KS98;A0A087WZK9;E5RJT0;E5RFW7;E5RFH0;E5RGU4;E5RHC7;E5RH59	6;6;5;3;2;2;2;1;1	Eukaryotic translation initiation factor 3 subunit H	EIF3H;EIF3S3	21.9	39.93	352	0.89919	5	1.0749	5
O43172-2;O43172	2;2	U4/U6 small nuclear ribonucleoprotein Prp4	PRPF4	4.6	58.32	521	0.89616	2	1.0922	2
Q8NC51-3;Q8NC51;Q8NC51-4;Q8NC51-2	9;9;8;8	Plasminogen activator inhibitor 1 RNA-binding protein	SERBP1	30	43.135	393	0.89263	11	1.4153	11
P63244;J3KPE3;H0YAF8;H0Y8W2;H0YAM7;D6RHH4;D6R9Z1;D6RAC2;D6R9L0;D6RFX4;D6REE5;D6RF23;D6RFZ9;H0Y8R5;D6RAU2;E9PD14;D6RBD0;H0Y9P0;D6RGK8;D6RHJ5;D6R909	11;10;9;9;8;7;7;7;7;6;6;5;5;4;4;4;4;3;1;1;1	Guanine nucleotide-binding protein subunit beta-2-like 1	GNB2L1	38.8	35.076	317	0.89126	10	0.98854	10
A0A0B4J210;Q6PKG0-3;Q6PKG0	1;1;1	La-related protein 1	LARP1	1.6	90.821	815	0.88902	2	1.0746	2
P23246-2;P23246	3;3	Splicing factor, proline- and glutamine-rich	SFPQ	4.3	72.262	669	0.88823	2	0.59007	2
Q9Y678;H0Y8X7;Q9UBF2-2;Q9UBF2	6;2;1;1	Coatomer subunit gamma-1	COPG1	7.7	97.717	874	0.88618	6	1.0888	6
I3L1L3;Q9BQG0;Q9BQG0-2	3;3;3	Myb-binding protein 1A	MYBBP1A	2.4	140.13	1252	0.88214	4	0.91946	4
Q6PD62	2	RNA polymerase-associated protein CTR9 homolog	CTR9	1.6	133.5	1173	0.88158	2	0.96469	2
P08621;P08621-2;P08621-3;M0QYR1;P08621-4;M0QX04	12;11;9;6;3;2	U1 small nuclear ribonucleoprotein 70 kDa	SNRNP70	23.3	51.556	437	0.87911	12	0.87615	12
Q9BUQ8;F8VVA2	3;1	Probable ATP-dependent RNA helicase DDX23	DDX23	3.9	95.581	820	0.87901	3	0.96734	3
Q99878;Q96KK5;Q9BTM1;Q16777;Q93077;Q7L7L0;Q6FI13;P20671;P0C0S8;P04908;H0YFX9;Q71UI9-2;C9J0D1;Q71UI9;P0C0S5;Q96QV6;P16104;Q9BTM1-2;Q71UI9-5;C9J386;Q71UI9-3;Q71UI9-4;Q8IUE6	3;3;3;3;3;3;3;3;3;3;2;2;2;2;2;2;2;2;1;1;1;1;1	Histone H2A type 1-J;Histone H2A type 1-H;Histone H2A.J;Histone H2A type 2-C;Histone H2A type 1-C;Histone H2A type 3;Histone H2A type 2-A;Histone H2A type 1-D;Histone H2A type 1;Histone H2A type 1-B/E;Histone H2A;Histone H2A.V;Histone H2A.Z;Histone H2A type 1-A;Histone H2A.x	HIST1H2AJ;HIST1H2AH;H2AFJ;HIST2H2AC;HIST1H2AC;HIST3H2A;HIST2H2AA3;HIST1H2AD;HIST1H2AG;HIST1H2AB;H2AFV;H2AFZ;HIST1H2AA;H2AFX	27.3	13.936	128	0.87538	4	1.1429	4
A0A087WZZ5;E9PPJ0;Q13435;E9PJT3;E9PJ04;H0YCG1;E9PIL8;H0YEX5	3;3;3;2;2;2;1;1	Splicing factor 3B subunit 2	SF3B2	3.9	97.584	871	0.87405	2	0.85283	2
Q01105-2;Q01105-3;A0A0C4DFV9;Q01105-4;Q01105;A0A087X027;P0DME0	5;4;4;4;4;4;4	Protein SET	SET	21.7	32.103	277	0.87245	5	0.96741	5
P06748-2;P06748;P06748-3;E5RI98;E5RGW4	9;9;8;3;2	Nucleophosmin	NPM1	40.4	29.464	265	0.86584	29	0.88883	29
P68371;P04350;Q3ZCM7;M0QY85;M0R2D3;M0QZL7;M0R278;M0R0X0;M0QY37;M0QX14;M0R042;M0QYM7;M0R2T4;A0A075B724	14;11;5;3;3;3;3;2;2;2;2;2;1;1	Tubulin beta-4B chain;Tubulin beta-4A chain	TUBB4B;TUBB4A	42.2	49.83	445	0.86544	4	1.0172	4
Q5JP53;P07437;Q5ST81;A0A075B736;Q5SQY0;I3L2F9;A6NNZ2;G3V2A3;Q9H4B7;CON__ENSEMBL:ENSBTAP00000025008;M0R1I1;G3V5W4;G3V2R8;G3V3R4;G3V2N6	14;14;12;4;4;4;4;3;2;2;1;1;1;1;1	Tubulin beta chain	TUBB	43.7	47.766	426	0.85973	27	0.93444	27
P56537;B7ZBH1	2;1	Eukaryotic translation initiation factor 6	EIF6	8.6	26.599	245	0.85924	2	1.3689	2
Q92688-2;Q92688	9;9	Acidic leucine-rich nuclear phosphoprotein 32 family member B	ANP32B	44.6	22.276	195	0.85717	6	0.98122	6
P62081;B5MCP9	4;3	40S ribosomal protein S7	RPS7	27.3	22.127	194	0.85453	3	0.9246	3
P0DMV9;P0DMV8;A0A0G2JIW1;P0DMV8-2;V9GZ37	15;15;15;14;10			24.3	70.051	641	0.8499	4	0.94218	4
Q13347;Q5TFK1	7;2	Eukaryotic translation initiation factor 3 subunit I	EIF3I	24.3	36.501	325	0.84899	6	1.012	6
Q969S3	3	Zinc finger protein 622	ZNF622	8.2	54.271	477	0.8475	3	1.4837	3
Q8WVC2;P63220;Q9BYK1;Q9BYK2	3;3;2;1	40S ribosomal protein S21	RPS21	42	8.85	81	0.8473	3	0.85015	3
O60701-3;O60701-2;O60701	2;2;2	UDP-glucose 6-dehydrogenase	UGDH	4.8	44.414	397	0.84688	2	0.92525	2
K7ES31;K7ERF1;Q9UBQ5-2;Q9UBQ5;K7EQM4;A0A087WVB9	2;2;2;2;1;1	Eukaryotic translation initiation factor 3 subunit K	EIF3K	18.2	15.875	137	0.84662	2	1.0539	2
P05387;H0YDD8	3;2	60S acidic ribosomal protein P2	RPLP2	50.4	11.665	115	0.84662	3	1.0471	3
P62861;E9PR30	1;1	40S ribosomal protein S30	FAU	16.9	6.6478	59	0.84614	2	1.0065	2
P49590-2;P49590;D6RJE6;B4DQ67;B3KWE1;D6RB22	6;6;3;3;3;1	Probable histidine--tRNA ligase, mitochondrial	HARS2;HARS	11.6	54.114	481	0.84019	6	0.89102	6
C9JXB8;C9JNW5;P83731	4;4;4	60S ribosomal protein L24	RPL24	33.1	14.369	121	0.83966	4	0.84199	4
K7ERI7;P35268;K7EJT5;K7EP65;K7EKS7;K7ELC4;K7EMH1	3;3;2;2;2;2;2	60S ribosomal protein L22	RPL22	41.1	11.168	95	0.83678	4	0.85509	4
E5RI99;P62888;E5RJH3;A0A0C4DH44;A0A0B4J213	3;3;2;2;1	60S ribosomal protein L30	RPL30	31.6	12.656	114	0.83437	3	0.90076	3
P23396;P23396-2;F2Z2S8;H0YF32;H0YCJ7;E9PPU1;E9PL09;H0YEU2;E9PQ96;E9PJH4;E9PK82;E9PSF4;H0YES8;E9PQX2	8;7;6;6;6;6;6;5;3;3;3;2;1;1	40S ribosomal protein S3	RPS3	37.4	26.688	243	0.83418	7	0.84596	7
Q5T6W2;P61978-3;P61978;P61978-2	3;3;3;3	Heterogeneous nuclear ribonucleoprotein K	HNRNPK	9	41.807	379	0.83351	2	1.0213	2
C9J9K3;P08865;A0A0C4DG17;F8WD59	7;7;7;4	40S ribosomal protein SA	RPSA	27.4	29.404	263	0.83313	4	0.81527	4
H3BU31;H3BM89;P36578	1;1;1	60S ribosomal protein L4	RPL4	6.4	18.966	171	0.83213	2	0.87945	2
Q9UMS4	3	Pre-mRNA-processing factor 19	PRPF19	6.9	55.18	504	0.8304	3	0.92453	3
E9PQP7;Q5H9R7-3;Q5H9R7-4;H7BXH2;E9PKF6;Q5H9R7-6;Q5H9R7-2;Q5H9R7;Q5H9R7-5;E9PK08;E9PNN8;H0YEN2;H0YDW1	4;4;4;4;4;4;4;4;4;2;2;2;1	Serine/threonine-protein phosphatase 6 regulatory subunit 3	PPP6R3	6.9	70.843	641	0.82946	4	1.32	4
I3L3P7;I3L246;P62244;H3BN98	2;2;2;2	40S ribosomal protein S15a	RPS15A	22	11.477	100	0.82699	2	0.95862	2
P25398	7	40S ribosomal protein S12	RPS12	53.8	14.515	132	0.82448	11	0.82894	11
P05141	8	ADP/ATP translocase 2;ADP/ATP translocase 2, N-terminally processed	SLC25A5	26.8	32.852	298	0.81965	5	0.97127	5
O00267-2;O00267	10;10	Transcription elongation factor SPT5	SUPT5H	10.6	120.5	1083	0.81365	12	0.86193	12
D6RB09;D6RG13;D6RAT0;P61247;E9PFI5;D6RAS7;H0Y8L7;H0Y9Y4;D6RED7;D6R9B6;D6RGE0;D6RI02	8;8;8;8;7;6;6;5;4;4;3;2	40S ribosomal protein S3a	RPS3A	44.6	22.459	193	0.81223	8	0.86227	8
M0R210;P62249;A0A087WZ27;M0R3H0;M0QX76;M0R1M5;Q6IPX4	8;8;7;4;3;3;2	40S ribosomal protein S16	RPS16	51.9	14.419	129	0.81205	7	0.78863	7
Q7Z6Z7-2;Q7Z6Z7-3;Q7Z6Z7	5;5;5	E3 ubiquitin-protein ligase HUWE1	HUWE1	1.3	480.19	4358	0.81134	3	0.7876	3
H0YEN5;P15880;E9PQD7;E9PPT0;E9PMM9;H3BNG3;H0YE27;I3L404;E9PM36	5;5;4;2;2;1;1;1;1	40S ribosomal protein S2	RPS2	27.7	21.154	195	0.80939	5	0.76016	5
Q14152;Q14152-2	27;25	Eukaryotic translation initiation factor 3 subunit A	EIF3A	18.5	166.57	1382	0.80753	26	0.89064	26
P62273;A0A087WTT6;P62273-2	2;1;1	40S ribosomal protein S29	RPS29	33.9	6.6767	56	0.80728	3	0.85296	3
H0YHC3;F8W020;F8W118;F8VXI6;F8VUX1;F8VY35;P55209-3;F8VV59;B7Z9C2;P55209-2;F8W0J6;F5H4R6;H0YIV4;P55209;F8VRJ2;H0YH88;F8W543;F8VVB5;E9PNW0;E9PJJ2;E9PS34;E9PNJ7	4;4;4;4;4;4;4;4;4;4;4;4;4;4;3;3;3;2;1;1;1;1	Nucleosome assembly protein 1-like 1	NAP1L1	24.7	23.417	198	0.80677	5	0.86145	5
P62269;J3JS69;A0A0G2JQH2;Q5GGW2	7;3;2;2	40S ribosomal protein S18	RPS18	42.8	17.718	152	0.80589	5	0.82988	5
O00425;O00425-2	6;2	Insulin-like growth factor 2 mRNA-binding protein 3	IGF2BP3	13.6	63.704	579	0.79268	5	0.68052	5
P10599-2;P10599	3;3	Thioredoxin	TXN	23.5	9.4519	85	0.79054	2	0.81783	2
P55884;P55884-2;C9JZG1;C9JQN7	21;21;10;7	Eukaryotic translation initiation factor 3 subunit B	EIF3B	29	92.48	814	0.78842	21	0.86922	21
Q13813-3;Q13813;A0A0D9SF54;Q13813-2;A0A0D9SGF6;A0A0D9SFH4;A0A0D9SFF6	17;17;16;16;16;1;1	Spectrin alpha chain, non-erythrocytic 1	SPTAN1	7.5	282.28	2452	0.77965	11	1.0017	11
Q99613-2;Q99613;B5ME19;H3BPE3;H3BPE4;H3BTY8	15;15;14;3;3;2	Eukaryotic translation initiation factor 3 subunit C;Eukaryotic translation initiation factor 3 subunit C-like protein	EIF3C;EIF3CL	17.1	104.1	903	0.77648	19	0.95802	19
Q9Y262-2;Q9Y262;B0QY89;B0QY90;C9JHP4;C9K0Q7;H7C3A0;H0Y7E6	15;15;15;11;4;4;3;2	Eukaryotic translation initiation factor 3 subunit L	EIF3L	28.1	61.013	516	0.7755	14	0.95684	14
P62753;A2A3R5;A2A3R7	3;2;1	40S ribosomal protein S6	RPS6	12	28.68	249	0.77478	4	1.0206	4
P61254;J3KTJ8;J3QRI7;J3QQQ9;J3QQV1;E5RIT6;J3QRC4;Q9UNX3;E5RHH1;J3KSS0	3;2;2;2;2;2;2;2;1;1	60S ribosomal protein L26;60S ribosomal protein L26-like 1	RPL26;KRBA2;RPL26L1	17.2	17.258	145	0.77467	4	0.99884	4
O15355	3	Protein phosphatase 1G	PPM1G	6.2	59.271	546	0.77408	2	0.97895	2
Q6P161	1	39S ribosomal protein L54, mitochondrial	MRPL54	7.2	15.819	138	0.77376	2	0.87597	2
Q01469	2	Fatty acid-binding protein, epidermal	FABP5	13.3	15.164	135	0.76806	2	0.94684	2
P60866;P60866-2;E5RIP1;E5RJX2;G3XAN0	2;2;1;1;1	40S ribosomal protein S20	RPS20	19.3	13.373	119	0.76601	4	0.75995	4
P62851	3	40S ribosomal protein S25	RPS25	22.4	13.742	125	0.76011	3	0.73288	3
A0A087WTT1;P11940-2;P11940;E7EQV3;E7ERJ7;H0YAR2;H0YBN4;Q9H361;E5RGH3;E5RH24;E5RJB9;H0YAP2;Q4VXU2-2;Q4VXU2;B1ANR0;Q13310-2;Q13310;Q13310-3;E5RGC4;E5RFD8;E5RHG7;H0YEQ8;B1ANR1;H0YB86;H0YCC8;Q5JQF8;Q96DU9-2;Q96DU9;H0Y5F5	8;8;8;7;7;5;4;4;3;3;3;2;2;2;2;2;2;2;1;1;1;1;1;1;1;1;1;1;1	Polyadenylate-binding protein 1;Polyadenylate-binding protein 3	PABPC1;PABPC3	16.7	58.535	522	0.7592	6	0.99562	6
M0QZN2;M0R0F0;P46782;M0R0R2	3;3;3;3	40S ribosomal protein S5;40S ribosomal protein S5, N-terminally processed	RPS5	27.6	14.763	134	0.75907	3	0.86346	3
Q5T8U3;P62424;Q5T8U2	2;2;1	60S ribosomal protein L7a	RPL7A	12.6	21.545	191	0.75568	2	0.90458	2
P39023;F8WCR1;H7C3M2;B5MCW2;H7C422;G5E9G0	2;1;1;1;1;1	60S ribosomal protein L3	RPL3	4.2	46.108	403	0.75546	2	0.95217	2
O00303;H0YDT6;E9PQV8	5;3;1	Eukaryotic translation initiation factor 3 subunit F	EIF3F	17.6	37.563	357	0.7522	4	0.94419	4
Q5JR95;P62241	5;5	40S ribosomal protein S8	RPS8	30.9	21.879	188	0.75135	5	0.87192	5
Q12906-5;Q12906-4;Q12906-2;Q12906-6;Q12906-3;Q12906;Q12906-7;K7EKJ9;K7ER69;K7EQR9;K7EJ09;K7ERM6;K7ENK6;K7EM82;K7EKY0;K7EQ75	18;18;18;18;18;18;18;7;4;4;3;2;2;2;2;1	Interleukin enhancer-binding factor 3	ILF3	28.8	74.606	690	0.75047	23	0.39135	23
A0A0G2JRP3;A0A0G2JQU7;E7EWK3;Q9H2U1-3;Q9H2U1-2;Q9H2U1	2;2;2;2;2;2	Probable ATP-dependent RNA helicase DHX36	DHX36	28.6	10.179	91	0.7501	2	0.83714	2
P43243;A8MXP9;D6REM6;D6R991;B3KM87;P43243-2;D6RBK5;Q68E03;H0Y8T4	4;4;3;2;2;2;1;1;1	Matrin-3	MATR3	6.1	94.622	847	0.74828	3	0.69769	3
H7C2W9;C9JU56;B7Z4E3;P62899-3;P62899;P62899-2;B7Z4C8;B8ZZK4	2;2;2;2;2;2;2;1	60S ribosomal protein L31	RPL31	21.3	12.701	108	0.74818	2	1.0037	2
P46783;F6U211;S4R435	2;2;2	40S ribosomal protein S10	RPS10	14.5	18.898	165	0.74213	2	0.84146	2
P60228;E5RGA2;E5RHS5;H0YBR5;E5RIT4;H0YAW4	6;5;3;2;1;1	Eukaryotic translation initiation factor 3 subunit E	EIF3E	12.6	52.22	445	0.73504	5	1.0246	5
P39019;M0R2L9;M0QXK4;M0QYF7;M0R140;A0A075B6E2	5;3;3;3;3;2	40S ribosomal protein S19	RPS19	29.7	16.06	145	0.72778	4	0.78836	4
P62857	2	40S ribosomal protein S28	RPS28	30.4	7.8409	69	0.72774	3	0.75393	3
J3KNJ2;Q7L2H7;E9PRY0;E9PN86;H0YCQ8;Q7L2H7-2	2;2;1;1;1;1	Eukaryotic translation initiation factor 3 subunit M	EIF3M	9.9	21.692	191	0.72561	3	0.89437	3
Q9NZI8;Q9NZI8-2	14;9	Insulin-like growth factor 2 mRNA-binding protein 1	IGF2BP1	31.5	63.48	577	0.71963	14	0.75934	14
P62277;J3KMX5;E9PS50	5;4;2	40S ribosomal protein S13	RPS13	35.1	17.222	151	0.71643	4	0.85275	4
P62701;C9JEH7;P22090;Q8TD47	7;6;6;4	40S ribosomal protein S4, X isoform;40S ribosomal protein S4, Y isoform 1;40S ribosomal protein S4, Y isoform 2	RPS4X;RPS4Y1;RPS4Y2	19.4	29.597	263	0.71576	5	0.75992	5
Q02539	2	Histone H1.1	HIST1H1A	13.5	21.842	215	0.71287	2	0.95436	2
E9PJD9;E9PLL6;P46776;E9PLX7	2;2;2;1	60S ribosomal protein L27a	RPL27A	23.1	10.127	91	0.70533	3	0.95273	3
E5RG31;P33991	1;1	DNA replication licensing factor MCM4	MCM4	3.2	31.633	278	0.70461	2	0.86566	2
P26373;J3QSB4;P26373-2;J3KS98	4;3;2;1	60S ribosomal protein L13	RPL13	17.5	24.261	211	0.68529	3	0.8358	3
K7ER90;K7EL20;O75821	1;1;1	Eukaryotic translation initiation factor 3 subunit G	EIF3G	5.7	25.441	227	0.68294	2	0.90694	2
P48681	2	Nestin	NES	1.2	177.44	1621	0.68087	2	0.78628	2
Q59GN2;P62891	1;1	Putative 60S ribosomal protein L39-like 5;60S ribosomal protein L39	RPL39P5;RPL39	19.6	6.3225	51	0.67808	2	0.95682	2
Q86YQ8-2;Q9HCH3-2;Q96FN4-2;O75131;Q96FN4;E7ENV7;Q8IYJ1;Q96A23;O95741;Q9UBL6-2;Q86YQ8;Q96A23-2;Q9HCH3;O95741-2;Q9UBL6	1;1;1;1;1;1;1;1;1;1;1;1;1;1;1	Copine-8;Copine-5;Copine-2;Copine-3;Copine-9;Copine-4;Copine-6;Copine-7	CPNE8;CPNE5;CPNE2;CPNE3;CPNE9;CPNE4;CPNE6;CPNE7	3.9	25.664	233	0.67054	2	1.0937	2
P67809;A0A087X1S2;H0Y449;C9J5V9;Q9Y2T7	7;6;5;3;3	Nuclease-sensitive element-binding protein 1	YBX1	34.3	35.924	324	0.6662	11	0.7179	11
P16403;P10412;P16402	2;2;2	Histone H1.2;Histone H1.4;Histone H1.3	HIST1H1C;HIST1H1E;HIST1H1D	9.9	21.364	213	0.65523	2	0.97282	2
E9PKZ0;P62917;E9PP36;G3V1A1;E9PKU4	2;2;1;1;1	60S ribosomal protein L8	RPL8	13.2	22.389	205	0.61675	2	0.90698	2
E7EPB3;P50914	2;2	60S ribosomal protein L14	RPL14	19.4	14.558	124	0.61623	2	0.92447	2
P40429;M0QZU1;A0A096LPE0;Q6NVV1;Q8J015;M0QYS1	2;1;1;1;1;1	60S ribosomal protein L13a;Putative 60S ribosomal protein L13a-like MGC87657	RPL13A;RPL13a	10.8	23.577	203	0.61153	2	0.83984	2
F8VUA6;Q07020-2;G3V203;H0YHA7;Q07020;J3QQ67;F8VYV2;A0A075B7A0	2;2;2;2;2;2;1;1	60S ribosomal protein L18	RPL18	20	14.529	130	0.60667	2	0.96243	2
P55265-5;P55265-3;H0YCK3;P55265-2;P55265;P55265-4	3;3;3;3;3;3	Double-stranded RNA-specific adenosine deaminase	ADAR	3.9	103.64	931	0.60377	4	0.52346	4
P19525;P19525-2;F8WBH4;C9JZT2	8;7;1;1	Interferon-induced, double-stranded RNA-activated protein kinase	EIF2AK2	16.9	62.094	551	0.54681	17	0.14981	16
P18124;A8MUD9	3;2	60S ribosomal protein L7	RPL7	16.1	29.225	248	0.53745	3	0.89999	3
A0A087X1A5;Q5JW30;O95793-2;O95793-3;O95793;Q5JW28;F6UDC6;G5EA18;Q9NUL3-4;E5RJN7;E7EVI1;Q9NUL3-6;A0A0A0MTC4;Q9NUL3-8;A0A0A0MTD1;Q9NUL3-3;F8VPI7;E7EPX0;Q9NUL3-7;A0A0A0MTC6;E7EVJ4;Q9NUL3-2;E9PH62;Q9NUL3;A0A0A0MTC5	3;3;3;3;3;2;1;1;1;1;1;1;1;1;1;1;1;1;1;1;1;1;1;1;1	Double-stranded RNA-binding protein Staufen homolog 1	STAU1	6.3	54.945	493	0.53365	2	0.59685	2
Q08211;Q08211-2	39;9	ATP-dependent RNA helicase A	DHX9	34.5	140.96	1270	0.52548	38	0.32809	38
P08779;CON__P08779;P02533;CON__P02533;CON__A2A4G1;P19012;CON__P19012;K7EPJ9;CON__Q6IFX2;K7EMS3;C9JTG5;P19012-2;A8MT21	6;6;5;5;4;4;4;3;3;1;1;1;1	Keratin, type I cytoskeletal 16;Keratin, type I cytoskeletal 14;Keratin, type I cytoskeletal 15	KRT16;KRT14;KRT15;KRT17	11.4	51.267	473	0.50628	2	0.20626	2
CON__P02769;P02768-3;A0A087WWT3;P02768-2;C9JKR2;H0YA55;D6RHD5;B7WNR0;A0A0C4DGB6;P02768;CON__P02768-1	8;2;2;2;2;2;2;2;2;2;2			15.2	69.293	607	0.14928	2	0.15111	1
P35527;CON__P35527;K7EQQ3	11;11;6	Keratin, type I cytoskeletal 9	KRT9	19.3	62.064	623	0.13995	8	0.052639	2
P35908;CON__P35908;H0YID6;CON__Q6NXH9	19;19;2;2	Keratin, type II cytoskeletal 2 epidermal	KRT2	31.9	65.432	639	0.10461	4	0.35908	1
CON__P00761	7			41.1	24.409	231	0.080592	21	0.028467	7
P13645;CON__P13645;CON__P02535-1;CON__P08730-1;Q7Z3Y7;CON__Q148H6;CON__Q7Z3Y7;Q7Z3Z0;CON__Q7Z3Z0;Q7Z3Y8;CON__Q7Z3Y8;CON__Q9Z2K1;CON__Q3ZAW8;Q2M2I5;CON__Q2M2I5;Q14525;CON__Q14525;A0A087X2I6;Q15323;CON__Q9UE12;CON__Q15323;CON__A2A5Y0;O76013-2;Q14532;CON__Q14532;O76014;CON__A2AB72;O76015;CON__O76015;O76013;CON__O76013;Q7Z3Y9;CON__Q7Z3Y9;CON__O76014;CON__REFSEQ:XP_986630;Q99456;CON__Q99456	20;20;8;3;3;3;3;2;2;2;2;2;2;2;2;1;1;1;1;1;1;1;1;1;1;1;1;1;1;1;1;1;1;1;1;1;1	Keratin, type I cytoskeletal 10	KRT10	34.2	58.826	584	0.063477	10	0.055035	4
P04264;CON__P04264;CON__Q6IFZ6;CON__H-INV:HIT000016045;CON__Q9R0H5;Q7Z794;CON__Q7Z794	22;22;2;1;1;1;1	Keratin, type II cytoskeletal 1	KRT1	33.9	66.038	644	0.043888	25	0.11086	12

## Sheet: DENV2 and 4 Rep#1 and Rep#2
Protein IDs	Peptide counts (all)	Protein names	Gene names	Sequence coverage [%]	Mol. weight [kDa]	Sequence length	Rep#1 DENV2 Ratio	Rep#1 DENV2 Ratio count	Rep#1 DENV4 Ratio	Rep#1 DENV4 Ratio count	Rep#2 DENV2 Ratio	Rep#2 DENV2 Ratio count	Rep#2 DENV4 Ratio	Rep#2 DENV4 Ratio count
Q9BY32-2;Q9BY32;Q9BY32-3	3;3;2	Inosine triphosphate pyrophosphatase	ITPA	26.6	19.603	177	NaN	0	NaN	0	0.70767	3	0.639591	3
K7ERL5;O96005-3;O96005-4;O96005	1;1;1;1	Cleft lip and palate transmembrane protein 1	CLPTM1	7.2	23.097	209	NaN	0	NaN	0	0.69546	2	0.71623	2
Q96PZ0;E7EUH7	3;1	Pseudouridylate synthase 7 homolog	PUS7	5.4	75.035	661	NaN	0	NaN	0	0.60092	3	0.717566	3
Q9UIA9;E7ESC6;A0A087WTZ2;Q9H2T7	3;3;1;1	Exportin-7	XPO7	3.4	123.91	1087	NaN	0	NaN	0	0.83091	4	0.758725	4
Q86SX6	2	Glutaredoxin-related protein 5, mitochondrial	GLRX5	15.9	16.628	157	NaN	0	NaN	0	0.7084	2	0.800064	2
P49643	2	DNA primase large subunit	PRIM2	4.3	58.805	509	NaN	0	NaN	0	0.73721	2	0.821963	2
K7ENA7;K7EJL1;E7ENJ6;Q9BXS5;Q9BXS5-2	1;1;1;1;1	AP-1 complex subunit mu-1	AP1M1	8.1	15.838	136	NaN	0	NaN	0	0.8058	2	0.846955	2
I3L2G1;K7EQD6;P46459-2;I3L0N3;P46459	1;1;1;1;1	Vesicle-fusing ATPase	NSF	10.3	15.216	136	NaN	0	NaN	0	0.95833	2	0.900495	2
P04181;P04181-2	2;1	Ornithine aminotransferase, mitochondrial;Ornithine aminotransferase, hepatic form;Ornithine aminotransferase, renal form	OAT	5.9	48.534	439	NaN	0	NaN	0	0.57564	2	0.937119	2
Q13618-3;Q13618-2;Q13618	1;1;1	Cullin-3	CUL3	1.7	81.092	702	NaN	0	NaN	0	1.0403	2	0.939585	2
F8VYE8;P36873;P36873-2;F8VR82;F8W0W8;A0A087WYY5	11;11;11;10;10;7	Serine/threonine-protein phosphatase;Serine/threonine-protein phosphatase PP1-gamma catalytic subunit	PPP1CC	42.1	34.95	304	NaN	0	NaN	0	1.3345	3	1.02567	3
Q6P452;P09525;P09525-2	2;2;1	Annexin;Annexin A4	ANXA4	9	33.552	299	NaN	0	NaN	0	0.62604	2	1.03786	2
P42167-2;G5E972;P42167;H0YJH7;P42167-3	2;2;2;1;1	Lamina-associated polypeptide 2, isoforms beta/gamma;Thymopoietin;Thymopentin	TMPO	7	38.737	345	NaN	0	NaN	0	0.88886	1	1.05511	2
Q86V97;Q8WVZ9	1;1	Kelch repeat and BTB domain-containing protein 6;Kelch repeat and BTB domain-containing protein 7	KBTBD6;KBTBD7	2.5	76.137	674	NaN	0	NaN	0	1.2946	2	1.11127	2
Q9BU61-2;Q9BU61	1;1	NADH dehydrogenase [ubiquinone] 1 alpha subcomplex assembly factor 3	NDUFAF3	8.7	13.842	127	NaN	0	NaN	0	1.0812	2	1.13024	2
O94992	1	Protein HEXIM1	HEXIM1	3.9	40.623	359	NaN	0	NaN	0	0.74187	2	1.21607	2
H0Y8N7;Q9BYD6	2;2	39S ribosomal protein L1, mitochondrial	MRPL1	9.5	26.614	231	NaN	0	NaN	0	1.6064	2	1.2189	2
Q96DH6-2;B4DHE8;Q96DH6;J3QKT5;J3KTC1;Q96DH6-3;B4DM51	2;2;2;1;1;1;1	RNA-binding protein Musashi homolog 2	MSI2	12	28.42	251	NaN	0	NaN	0	1.4153	2	1.29515	2
P54709;H7C547;F8WBY4;C9JXZ1;C9JA36;P54709-2	2;1;1;1;1;1	Sodium/potassium-transporting ATPase subunit beta-3	ATP1B3	9	31.512	279	NaN	0	NaN	0	1.0527	2	1.52802	2
Q14444-2;Q14444;G3V153;A0A087X082;E9PLA9	8;8;7;7;5	Caprin-1	CAPRIN1	14.7	76.861	694	4.4573	10	0.9287	10	5.9693	9	1.06337	9
Q8TAL5	2	Uncharacterized protein C9orf43	C9orf43	3.9	52.221	461	4.3683	2	0.94742	2	1.5516	1	1.41523	1
Q9UN86-2;Q9UN86;D6RAC7;D6RB17;D6RBM9;D6REX8;D6RBR0;D6RE13;D6RBW8;D6RGJ4	8;8;2;2;1;1;1;1;1;1	Ras GTPase-activating protein-binding protein 2	G3BP2	22.5	50.817	449	4.0749	7	0.79025	7	7.374	4	1.20703	4
Q96F86;H3BPN4;H3BSQ0	9;5;3	Enhancer of mRNA-decapping protein 3	EDC3	23.4	56.077	508	3.9581	6	7.0453	6	5.5963	3	5.36625	3
H0Y8R1;F5H5I6;H0YAK1;Q12849;Q12849-5;H0YAM1	9;9;9;9;5;1	G-rich sequence factor 1	GRSF1	27.8	47.27	417	3.901	9	1.2251	9	5.6974	8	2.01292	8
Q14694;Q14694-3;Q14694-2;H3BNA1;H3BQP1;J3KT19;H3BQC6;H3BNL0;Q68D90;H3BNS8;H3BVF1	13;12;12;4;3;3;2;1;1;1;1	Ubiquitin carboxyl-terminal hydrolase 10	USP10	23.1	87.133	798	3.8092	6	1.0771	6	4.5702	4	1.28153	4
Q2Q1W2	5	E3 ubiquitin-protein ligase TRIM71	TRIM71	7.6	93.384	868	3.5477	5	1.2828	5	3.2574	2	1.40489	2
P26196;Q8IV96	14;4	Probable ATP-dependent RNA helicase DDX6	DDX6	44.3	54.416	483	3.3177	12	6.7359	12	4.5001	10	9.02201	10
A0A0C4DG98;Q8NI27	2;2	THO complex subunit 2	THOC2	1.5	169.58	1478	2.8138	2	2.4897	2	0.91516	1	0.838434	1
O14979-3;O14979-2;A0A087WUK2;O14979	11;11;11;11	Heterogeneous nuclear ribonucleoprotein D-like	HNRPDL	32.8	27.191	244	2.6474	11	0.92991	11	3.5728	13	1.11977	13
Q15020;Q15020-4;Q15020-2;F8W667;F8VVK9;H0YHU8;F8VZM2;Q15020-3	27;26;6;4;3;3;3;1	Squamous cell carcinoma antigen recognized by T-cells 3	SART3	29.8	109.93	963	2.6165	26	1.3901	26	3.1922	23	1.74917	23
Q9H1I8;B1AH59;Q9H1I8-2;Q9H1I8-3	10;7;6;5	Activating signal cointegrator 1 complex subunit 2	ASCC2	19.3	86.359	757	2.5988	9	1.3668	9	1.7071	4	0.735943	4
A0A087WYR0;P09132;A0A087WWU9;D6RBG4;P09132-2	5;5;2;1;1	Signal recognition particle 19 kDa protein	SRP19	45	13.654	120	2.4505	8	1.395	8	1.3342	10	0.906618	10
Q9Y6M1-1;Q9Y6M1;F8W930;Q9Y6M1-5;Q9Y6M1-6;Q9Y6M1-3;Q9Y6M1-4	13;13;13;10;10;10;10	Insulin-like growth factor 2 mRNA-binding protein 2	IGF2BP2	30.6	61.842	556	2.4163	13	1.735	13	2.8514	11	2.56154	11
Q9HD40;Q9HD40-3;D6R969;Q9HD40-2;H0Y9D2;J3KP25	5;4;2;1;1;1	O-phosphoseryl-tRNA(Sec) selenium transferase	SEPSECS	11.8	55.726	501	2.3242	4	1.3916	4	1.0067	3	0.77997	3
Q5T9A4;Q5T9A4-3	4;3	ATPase family AAA domain-containing protein 3B	ATAD3B	6	72.572	648	2.2832	2	0.91489	2	2.1725	1	1.30936	1
Q8N3C0;Q8N3C0-4;Q8N3C0-3;E5RFZ0;J3KNJ4	36;9;2;2;1	Activating signal cointegrator 1 complex subunit 3	ASCC3	20.1	251.46	2202	2.2742	27	1.3117	27	1.7987	22	0.71803	22
P49711;P49711-2	2;1	Transcriptional repressor CTCF	CTCF	3.7	82.785	727	2.2342	2	1.2071	2	2.8112	2	1.57811	2
A0A087WYX8;Q14CM0	1;1	FERM and PDZ domain-containing protein 4	FRMPD4	1	139.96	1282	2.2264	2	1.3803	2	1.3967	2	1.06278	2
Q4G0J3;Q4G0J3-3;D6RFF0;Q4G0J3-2;H0YA82;D6RF22;D6RF49;D6RAF3;D6R9Z6	9;9;5;4;4;1;1;1;1	La-related protein 7	LARP7	21.1	66.898	582	2.1686	13	1.21	13	1.2767	11	0.792267	11
Q9Y399;Q5T8A0	3;2	28S ribosomal protein S2, mitochondrial	MRPS2	9.1	33.249	296	2.031	4	1.2239	4	0.86164	3	0.671276	3
P82932	4	28S ribosomal protein S6, mitochondrial	MRPS6	29.6	14.226	125	1.9731	4	1.3374	4	1.3126	4	0.85237	4
H0YES5;B7Z524;H0YDX7;J3QT46;Q9Y450-4;Q9Y450;E9PHZ9	2;2;2;2;2;2;1	HBS1-like protein	HBS1L	14.1	18.635	170	1.9669	2	1.0827	2	1.3857	2	1.00378	2
P37108;H0YLA2	7;6	Signal recognition particle 14 kDa protein	SRP14	41.2	14.57	136	1.9096	11	1.2154	11	1.356	17	1.0019	17
Q9NZI8;Q9NZI8-2	20;14	Insulin-like growth factor 2 mRNA-binding protein 1	IGF2BP1	41.2	63.48	577	1.9048	31	1.5263	31	2.1689	25	2.05935	25
H0YAT2;Q9Y2Q9;E5RGC7;E5RFH3;E5RK86;H7C5V3	3;3;2;2;1;1	28S ribosomal protein S28, mitochondrial	MRPS28	30.1	15.791	143	1.9023	3	1.0818	3	0.71116	1	0.851861	1
P49458;E9PE20;P49458-2	4;3;3	Signal recognition particle 9 kDa protein	SRP9	47.7	10.112	86	1.8937	4	1.2443	4	1.4665	5	1.00605	5
E7EPW2;P82663-3;P82663-2;P82663	2;2;2;2	28S ribosomal protein S25, mitochondrial	MRPS25	22.7	12.946	110	1.8822	3	1.1973	3	0.88099	1	0.684322	1
Q9UHB9;Q9UHB9-4;Q9UHB9-2;Q9UHB9-3;K7EN53;K7EQC2	26;25;24;13;2;2	Signal recognition particle subunit SRP68	SRP68	46.1	70.729	627	1.8796	33	1.1568	34	1.2854	36	0.87581	36
P82664	3	28S ribosomal protein S10, mitochondrial	MRPS10	21.9	22.999	201	1.8499	3	1.1021	3	1.2007	3	0.914411	3
O60783	2	28S ribosomal protein S14, mitochondrial	MRPS14	21.9	15.139	128	1.8323	2	1.1439	2	1.1857	2	0.770535	2
P82673;H0YG82;P82673-2	2;1;1	28S ribosomal protein S35, mitochondrial	MRPS35	7.1	36.844	323	1.8273	2	1.0648	2	1.0268	1	0.792896	1
E9PE17;Q9Y2R5;I3L0E3	4;4;4	28S ribosomal protein S17, mitochondrial	MRPS17	51.9	14.374	129	1.8202	4	1.0078	4	1.1414	4	0.812348	4
Q9NVS2-3;Q9NVS2;Q5QPA5;Q9NVS2-2	1;1;1;1	28S ribosomal protein S18a, mitochondrial	MRPS18A	11	14.03	127	1.8166	2	1.084	2	1.1215	1	0.77226	1
Q7L2J0	2	7SK snRNA methylphosphate capping enzyme	MEPCE	3	74.354	689	1.8078	3	1.2758	3	0.71802	3	0.755915	3
Q9BQ67;M0QX71	4;3	Glutamate-rich WD repeat-containing protein 1	GRWD1	12.3	49.419	446	1.8031	4	0.93863	4	1.4731	4	0.951475	4
P61011;P61011-2;G3V4F7;G3V480;G3V346;A0A0D9SFN7;G3V3L9	19;17;16;3;1;1;1	Signal recognition particle 54 kDa protein	SRP54	44.2	55.704	504	1.7992	19	1.1837	19	1.1147	19	0.959601	19
O00425;O00425-2;F8WD15	17;7;4	Insulin-like growth factor 2 mRNA-binding protein 3	IGF2BP3	35.8	63.704	579	1.7978	18	1.8567	18	2.8839	14	2.77262	14
Q9Y383-3;A0A0A6YYC3;Q9Y383-2;Q9Y383;Q96HJ9-2;A0A0A6YYJ8	2;2;2;2;2;2	Putative RNA-binding protein Luc7-like 2	LUC7L2	6.2	46.228	389	1.7946	5	0.99022	5	1.0285	2	1.48054	2
J3QLR8;Q9Y3D9	5;5	28S ribosomal protein S23, mitochondrial	MRPS23	38.2	17.517	152	1.7699	5	1.0814	5	1.0413	5	0.783331	5
Q96BP2;A6NJX6	2;1	Coiled-coil-helix-coiled-coil-helix domain-containing protein 1	CHCHD1	22.9	13.475	118	1.7519	2	0.82996	2	1.7968	2	0.890551	2
O76094;O76094-2;R4GNC1;D6RDY6	25;22;11;11	Signal recognition particle subunit SRP72	SRP72	46.3	74.605	671	1.7485	30	1.1357	30	1.3347	37	0.848392	37
Q13283;E5RIZ6	7;1	Ras GTPase-activating protein-binding protein 1	G3BP1	20.6	52.164	466	1.7451	13	1.055	13	1.9648	17	1.08018	17
Q92665	2	28S ribosomal protein S31, mitochondrial	MRPS31	7.8	45.318	395	1.7158	3	0.89827	3	1.6547	1	0.769882	1
Q9Y291;C9JBY7	2;1	28S ribosomal protein S33, mitochondrial	MRPS33	17	12.629	106	1.7084	2	1.0743	2	1.0763	2	0.80032	2
P25815	3	Protein S100-P	S100P	41.1	10.4	95	1.7039	3	1.1423	3	1.7303	3	1.14448	3
D6R9P3;D6RD18;Q99729-3;D6RBZ0;A0A087WZV1;Q99729-2;Q99729-4;Q99729	8;8;8;8;8;8;7;7	Heterogeneous nuclear ribonucleoprotein A/B	HNRNPAB	31.8	30.302	280	1.6947	11	1.2445	11	2.1519	12	1.18973	12
Q9NVI7-2;Q9NVI7;Q5T2N8;Q9NVI7-3;H0Y2W2;Q5SV16	4;4;3;3;3;2	ATPase family AAA domain-containing protein 3A;ATPase family AAA domain-containing protein 3C	ATAD3A;ATAD3C	6.7	66.217	586	1.6865	5	1.0247	5	3.1987	3	1.77768	3
Q15527	7	Surfeit locus protein 2	SURF2	34	29.647	256	1.6775	9	1.1149	9	1.3155	9	1.10801	9
Q9Y3A4	2	Ribosomal RNA-processing protein 7 homolog A	RRP7A	8.6	32.334	280	1.6722	2	1.1655	2	1.4821	2	0.96581	2
P82912-2;P82912;H0YL99;P82912-3	3;3;1;1	28S ribosomal protein S11, mitochondrial	MRPS11	29	20.459	193	1.6686	3	0.9875	3	0.95898	2	0.909753	2
Q96PK6;Q96PK6-2;Q96PK6-3;A0A0A6YYI9;Q96PK6-4;F8WDX3;A0A0A0MSL8;B8ZZ74;Q96PK6-5	12;9;5;5;5;5;5;5;5	RNA-binding protein 14	RBM14	16.1	69.491	669	1.6572	18	1.6523	18	2.0528	14	1.89541	14
Q86U42-2;Q86U42;B4DEH8;G3V4T2;Q92843-2;H0YJH9	4;4;3;3;3;2	Polyadenylate-binding protein 2	PABPN1	15.2	31.496	296	1.6503	3	1.2978	3	2.6937	3	1.2203	3
Q9UNF0-2;Q9UNF0	2;2	Protein kinase C and casein kinase substrate in neurons protein 2	PACSIN2	4.9	51.353	445	1.646	2	1.0049	2	1.2797	1	0.693577	1
G5E9W8;C9JQ42;P46976-3;P46976-2;P46976;C9J8R8;C9J7C7	3;3;3;3;3;1;1	Glycogenin-1	GYG1	18.7	21.51	193	1.6306	1	1.4168	1	1.0359	3	1.04917	3
Q14978;A0A0A0MRM9;Q14978-2;S4R349;S4R402;S4R3C2	14;14;14;5;2;1	Nucleolar and coiled-body phosphoprotein 1	NOLC1	22.2	73.602	699	1.6153	6	0.84993	6	1.1371	5	0.733299	5
Q14978-3;S4R341	14;3	Nucleolar and coiled-body phosphoprotein 1	NOLC1	22.3	73.744	700	1.5995	50	0.87527	50	1.0558	40	0.780701	40
Q8N983-4;H0YBU8;Q8N983-3;H0Y6Y8;B1AL05;Q8N983-2;Q8N983;Q8N983-6;Q8N983-7	4;3;3;3;3;3;3;3;3	39S ribosomal protein L43, mitochondrial	MRPL43	28.9	17.853	159	1.5923	3	1.1199	3	1.3867	3	1.03321	3
Q9HD33-2;Q9HD33;Q9HD33-3	3;3;2	39S ribosomal protein L47, mitochondrial	MRPL47	12.6	27.085	230	1.5919	4	0.96737	4	1.2498	3	1.11188	3
Q9UJA5-4;Q9UJA5-2;Q9UJA5;Q9UJA5-3	2;2;2;1	tRNA (adenine(58)-N(1))-methyltransferase non-catalytic subunit TRM6	TRMT6	7.3	36.439	327	1.5784	1	1.1498	1	0.78618	2	1.08191	2
Q00059;Q00059-2;H7BYN3	7;5;5	Transcription factor A, mitochondrial	TFAM	26.4	29.096	246	1.5772	8	1.157	8	2.0802	6	1.27877	6
D6RAN8;H7C5U8;Q9P0M9	2;2;2	39S ribosomal protein L27, mitochondrial	MRPL27	22.6	10.474	93	1.5762	2	1.1286	2	1.3694	3	1.02484	3
Q9H6R4-4;Q9H6R4;Q9H6R4-2;A0A0A0MRW6;Q9H6R4-3;A0A0C4DFX0	9;9;8;8;5;1	Nucleolar protein 6	NOL6	11.6	127.32	1143	1.5649	8	1.1097	8	1.065	6	1.03935	6
Q96EY7;Q96EY7-2	4;1	Pentatricopeptide repeat domain-containing protein 3, mitochondrial	PTCD3	9	78.549	689	1.5579	4	0.9395	4	0.89114	2	0.753523	2
O43447;C9JQD4;H0YEL5;O43447-2;A6NM32	6;5;4;4;1	Peptidyl-prolyl cis-trans isomerase H;Peptidyl-prolyl cis-trans isomerase	PPIH	41.8	19.208	177	1.5512	7	1.0533	7	1.8227	5	1.1815	5
P51398-2;P51398-3;P51398;V9GZ61;V9GYW1;V9GYA7;V9GZ03;V9GYJ9;V9GYL9;V9GYF7;V9GYC9;V9GYJ3;V9GY11	4;4;4;2;2;2;2;2;2;1;1;1;1	28S ribosomal protein S29, mitochondrial	DAP3	17.4	41.044	357	1.5504	4	0.99069	4	0.93248	4	0.79447	4
C9J384;Q9BQ75-2;Q9BQ75;H7C515	2;2;2;1	Protein CMSS1	CMSS1	9.8	26.228	225	1.5288	2	1.163	2	1.6944	2	1.24916	2
G5E9W7;G5E9V5;P82650;H7C5L9;H7C5F2;P82650-2;H7C5H3	4;4;4;2;1;1;1	28S ribosomal protein S22, mitochondrial	MRPS22	14.1	36.805	319	1.5237	3	0.90402	3	0.87665	4	0.644579	4
K7EQ03;Q9BTD8-4;Q9BTD8-2;Q9BTD8-3;K7EP90;Q9BTD8;K7EML2	4;4;4;4;4;4;2	RNA-binding protein 42	RBM42	12.4	44.638	426	1.5162	6	1.432	6	1.4637	5	1.53238	5
Q5JR04;Q9HCE1;Q9HCE1-2	4;4;2	Putative helicase MOV-10	MOV10	5.2	107.21	947	1.512	3	1.3416	3	0.87108	2	0.81248	2
O43172-2;O43172	8;8	U4/U6 small nuclear ribonucleoprotein Prp4	PRPF4	20.2	58.32	521	1.5072	7	1.0634	7	1.2199	6	1.08448	6
D6RA77;Q9BPZ3	1;1	Polyadenylate-binding protein-interacting protein 2	PAIP2	15.1	11.385	93	1.4876	2	1.1329	2	NaN	0	NaN	0
Q96DV4;Q96DV4-2	2;1	39S ribosomal protein L38, mitochondrial	MRPL38	4.7	44.596	380	1.4867	4	1.4891	4	1.1637	3	1.04819	3
A0A087WUZ8;P82930;C9JJ19	4;4;4	28S ribosomal protein S34, mitochondrial	MRPS34	21	20.662	176	1.4853	3	0.9417	3	1.1751	5	0.723223	5
O60264;P28370-2;P28370;A0A0A0MRP6;B7ZLQ5	9;6;6;6;6	SWI/SNF-related matrix-associated actin-dependent regulator of chromatin subfamily A member 5;Probable global transcription activator SNF2L1	SMARCA5;SMARCA1	8.4	121.9	1052	1.4851	6	0.98995	6	1.4247	5	0.896459	5
O43818	8	U3 small nucleolar RNA-interacting protein 2	RRP9	28.4	51.84	475	1.4827	9	1.0885	9	1.261	9	0.960523	9
B1ANR0;Q13310-2;Q13310;Q13310-3;H0Y5F5;H0YCC8;H0YEU6;B1ANR1;H0YEQ8	11;11;11;11;8;4;4;3;2	Polyadenylate-binding protein 4	PABPC4	19	67.97	615	1.4775	5	1.1921	5	0.84863	5	0.822774	5
Q96GA3	2	Protein LTV1 homolog	LTV1	6.5	54.854	475	1.4724	2	2.3213	2	1.3251	1	0.839278	1
Q13405;H0YDP7;E9PNF1;E9PI78	5;3;2;1	39S ribosomal protein L49, mitochondrial	MRPL49	36.7	19.198	166	1.4676	6	1.0479	6	1.3642	5	1.10108	5
X6RLN4;Q71RC2-2;Q71RC2-6;Q71RC2-5;Q71RC2-3;Q71RC2;Q71RC2-4	2;2;2;2;2;2;2	La-related protein 4	LARP4	6.1	54.981	491	1.465	2	1.4257	2	NaN	0	NaN	0
Q8NC51-3;Q8NC51;Q8NC51-4;Q8NC51-2	13;13;12;12	Plasminogen activator inhibitor 1 RNA-binding protein	SERBP1	39.4	43.135	393	1.4629	27	1.3072	27	1.5024	25	1.03343	26
F5H702;Q96GC5-3;Q96GC5;F5H8D0	3;3;3;2	39S ribosomal protein L48, mitochondrial	MRPL48	28.3	12.77	113	1.4591	4	1.0645	4	1.6708	3	1.28207	3
Q99575;E5RK39	8;1	Ribonucleases P/MRP protein subunit POP1	POP1	11.2	114.71	1024	1.4566	5	1.0676	5	1.133	4	0.925069	4
Q16630-3;F8WJN3;Q16630;Q16630-2;F8W084	3;3;3;3;1	Cleavage and polyadenylation specificity factor subunit 6	CPSF6	11.3	52.325	478	1.4549	7	1.0396	7	1.4812	4	0.911245	4
Q9NV31	1	U3 small nucleolar ribonucleoprotein protein IMP3	IMP3	8.2	21.85	184	1.4546	1	1.0707	1	1.652	2	1.32245	2
Q71UI9-2;C9J0D1;Q71UI9;P0C0S5;C9J386;Q71UI9-3;Q71UI9-4;Q96QV6;P16104;Q9BTM1-2;Q71UI9-5;Q8IUE6	3;3;3;3;2;2;2;2;2;2;1;1	Histone H2A.V;Histone H2A;Histone H2A.Z;Histone H2A type 1-A;Histone H2A.x;Histone H2A.J	H2AFV;H2AFZ;HIST1H2AA;H2AFX;H2AFJ	22.8	12.146	114	1.4545	1	0.90693	1	1.1899	2	0.8992	2
Q14498-3;Q14498-2;Q14498;G3XAC6;H0Y4X3;Q5QP23;A0A087X122;Q5QP22	6;6;6;5;4;2;1;1	RNA-binding protein 39	RBM39	16.5	57.089	508	1.4536	9	1.1346	9	1.6374	7	0.892857	7
P52292;J3QLL0;J3KS65	14;4;4	Importin subunit alpha-1	KPNA2	43.5	57.861	529	1.4525	15	1.0763	15	1.1233	14	0.926269	14
Q9HCM4-2;Q9HCM4-4;Q9HCM4-3;Q9HCM4;Q9H329-2;Q9H329	2;2;2;2;1;1	Band 4.1-like protein 5;Band 4.1-like protein 4B	EPB41L5;EPB41L4B	3.2	57.885	505	1.4517	2	0.98004	2	1.0663	2	1.03081	2
Q9Y3D3;A6ND22;Q9Y3D3-2	5;3;3	28S ribosomal protein S16, mitochondrial	MRPS16	52.6	15.345	137	1.4509	2	0.79602	2	1.019	4	0.765228	4
A3KFL5;Q13868-3;Q13868-2;A3KFL2;Q13868;A3KFL1	2;2;2;2;2;1	Exosome complex component RRP4	EXOSC2	9.3	26.327	237	1.4505	1	1.4522	1	1.6437	2	0.903016	2
P41743	2	Protein kinase C iota type	PRKCI	3.7	68.262	596	1.4374	1	1.172	1	0.96664	2	1.21247	2
Q9NWU5;E7ESL0;A0A0C4DGX2;J3KQY1;Q9NWU5-2;Q9NWU5-3	2;2;2;2;1;1	39S ribosomal protein L22, mitochondrial	MRPL22	10.2	23.64	206	1.432	3	0.75279	3	1.1504	1	1.10277	1
P46777;Q5T7N0;R4GNJ2	17;5;1	60S ribosomal protein L5	RPL5	57.9	34.362	297	1.4279	49	1.1273	49	1.2588	52	1.51368	54
Q8IXM3	6	39S ribosomal protein L41, mitochondrial	MRPL41	62.8	15.383	137	1.4273	5	1.0125	5	1.3142	4	1.07556	4
G5EA06;Q92552;Q92552-2;D6RH20;D6RJC7;E5RJ73	6;6;6;5;4;1	28S ribosomal protein S27, mitochondrial	MRPS27	17.6	41.329	358	1.425	3	0.95268	3	0.84248	4	0.650111	4
O43592;F8WDU6	2;1	Exportin-T	XPOT	2.5	109.96	962	1.4247	1	1.3083	1	1.1145	2	0.960061	2
Q9BYD1;E5RJI7;E5RFI2;H0YAX3	5;3;2;1	39S ribosomal protein L13, mitochondrial	MRPL13	31.5	20.692	178	1.4229	4	0.98327	4	1.2222	2	1.12016	2
Q9BYC9;I3L2X1;Q9BYC9-2	4;2;2	39S ribosomal protein L20, mitochondrial	MRPL20	26.8	17.442	149	1.4187	3	1.0191	3	1.4212	1	0.984543	1
O43809;H3BND3;H3BV41	8;5;3	Cleavage and polyadenylation specificity factor subunit 5	NUDT21	44.5	26.227	227	1.415	8	1.1008	8	1.491	8	0.932314	8
P55769;B1AHD1	7;6	NHP2-like protein 1;NHP2-like protein 1, N-terminally processed	NHP2L1	46.9	14.173	128	1.4119	5	0.87623	5	1.3486	7	1.06343	7
O43823	1	A-kinase anchor protein 8	AKAP8	2.9	76.107	692	1.4109	2	1.1064	2	1.2109	2	0.939585	2
E9PF06;P09001;H0Y9G6;E7ETU7;D6RC14	2;2;2;2;1	39S ribosomal protein L3, mitochondrial	MRPL3	15.3	19.58	176	1.4101	2	0.97019	2	1.1083	1	1.0454	1
O43324;O43324-2;D6RBD7;C9J1V9;H0YAL7;D6RCQ0;H0YAH9	9;6;6;6;5;2;1	Eukaryotic translation elongation factor 1 epsilon-1	EEF1E1;hCG_2043275	58.6	19.81	174	1.4068	10	1.1205	10	1.5154	16	1.05894	16
C9JYM0;O75817	3;3	Ribonuclease P protein subunit p20	POP7	30.7	15.324	137	1.4049	3	1.3639	3	1.2004	3	1.07309	3
Q9NQZ2	2	Something about silencing protein 10	UTP3	5.2	54.557	479	1.4019	2	1.927	2	4.3557	1	1.15137	1
Q9NQ50	2	39S ribosomal protein L40, mitochondrial	MRPL40	11.7	24.49	206	1.3987	3	1.021	3	1.2717	1	1.17246	1
Q9H0U6	2	39S ribosomal protein L18, mitochondrial	MRPL18	10.6	20.576	180	1.3975	2	1.0421	2	1.3647	1	0.98668	1
E9PKV2;Q9NRX2	3;3	39S ribosomal protein L17, mitochondrial	MRPL17	21.8	16.371	142	1.3957	3	0.99041	3	1.3892	3	1.1054	3
M0QX52;K7EL66;K7ERD8;Q15555-2;Q15555-4;Q15555-5;Q15555-3;Q15555	1;1;1;1;1;1;1;1	Microtubule-associated protein RP/EB family member 2	MAPRE2	9.4	14.92	127	1.391	2	1.0218	2	NaN	0	NaN	0
Q5T0D9-2;Q5T0D9	2;2	Tumor protein p63-regulated gene 1-like protein	TPRG1L	8.5	23.346	213	1.383	2	1.0377	2	0.93411	1	1.08342	1
Q9UN81	4		ORF1	14.5	40.055	338	1.3811	4	1.1484	4	1.0339	1	1.04831	1
Q7RTV0	5	PHD finger-like domain-containing protein 5A	PHF5A	50	12.405	110	1.3774	4	0.93693	4	1.2493	6	1.00751	6
P47813;O14602;X6RAC9;A6NJH9	6;5;4;4	Eukaryotic translation initiation factor 1A, X-chromosomal;Eukaryotic translation initiation factor 1A, Y-chromosomal	EIF1AX;EIF1AY	40.3	16.46	144	1.377	7	0.95738	7	1.551	9	0.996711	9
Q9BQ48;M0R226	2;2	39S ribosomal protein L34, mitochondrial;Ribosomal protein L34	MRPL34	23.9	10.165	92	1.3733	1	0.84767	1	1.3638	2	1.10342	2
Q13442;F8WBW6	6;1	28 kDa heat- and acid-stable phosphoprotein	PDAP1	33.1	20.63	181	1.3728	9	0.9414	9	2.0295	7	0.828363	7
P52815;B4DLN1;F6QW41	4;4;1	39S ribosomal protein L12, mitochondrial	MRPL12;SLC25A10	16.2	21.348	198	1.3708	4	1.0248	4	1.6028	5	1.18948	5
X6R631;Q7Z7F7;Q7Z7F7-2	1;1;1	39S ribosomal protein L55, mitochondrial	MRPL55	27.3	6.8487	55	1.3702	2	0.96223	2	1.6543	2	0.984737	2
O43390;O43390-3;B4DT28	22;20;16	Heterogeneous nuclear ribonucleoprotein R	HNRNPR;HNRPR	37.8	70.942	633	1.3676	28	0.99888	28	1.4554	29	1.15038	29
Q09161;X6R941;F2Z2T1	12;3;1	Nuclear cap-binding protein subunit 1	NCBP1	19.4	91.838	790	1.3664	20	0.99878	20	1.0806	11	1.00154	11
Q12904;Q12904-2;D6R937	8;8;2	Aminoacyl tRNA synthase complex-interacting multifunctional protein 1;Endothelial monocyte-activating polypeptide 2	AIMP1	41.3	34.352	312	1.3618	7	0.97673	7	1.2388	10	1.0328	10
Q9NPE3;H0YM60	2;1	H/ACA ribonucleoprotein complex subunit 3	NOP10	32.8	7.7059	64	1.3594	2	0.94923	2	0.938	2	0.994036	2
P52926-3;P52926-6;P52926-4;F5H2U8;P52926-5;P52926-2;P52926;F5H2A4;F5H6H0	2;2;2;2;2;2;2;2;2	High mobility group protein HMGI-C	HMGA2	40.7	9.2733	86	1.3586	3	1.1182	3	2.6694	4	0.99691	4
P52298;C9JQX9;B3KSB0;P52298-3;P52298-2;F8WE41	3;2;2;2;2;1	Nuclear cap-binding protein subunit 2	NCBP2	20.5	18.001	156	1.3573	3	0.97648	3	1.5487	3	1.1473	3
Q9Y3E5;J3KQ48	5;5	Peptidyl-tRNA hydrolase 2, mitochondrial	PTRH2	44.7	19.193	179	1.3523	8	0.99961	8	1.4298	12	1.15477	12
O95232;J3KPP4;D6RHH0;U3KQT3;D6RDI2	2;2;1;1;1	Luc7-like protein 3	LUC7L3	6.2	51.466	432	1.3448	2	1.0137	2	1.2454	2	0.925326	2
P02794;G3V192;E9PRK8;G3V1D1;E9PKY7;E9PPQ4;E9PQR3;E9PKM5;E9PK45	5;4;3;3;3;2;1;1;1	Ferritin heavy chain;Ferritin	FTH1	27.9	21.225	183	1.3441	9	1.1565	9	0.81078	10	0.812678	10
Q7Z2W4-3;Q7Z2W4-2;Q7Z2W4;C9J6P4	4;4;4;4	Zinc finger CCCH-type antiviral protein 1	ZC3HAV1	7.1	67.589	624	1.3408	4	1.1601	4	1.502	3	1.5933	3
E9PLD3;E9PRG8;A0A0B4J220	1;1;1		C11orf48	13.1	11.6	99	1.3407	1	1.021	1	1.4479	2	0.964506	2
P31942-2;P31942;P31942-3;P31942-6;P31942-5;P31942-4	5;5;4;2;2;2	Heterogeneous nuclear ribonucleoprotein H3	HNRNPH3	18.4	35.238	331	1.3405	9	1.4453	9	1.6421	7	1.13164	7
Q96I59;Q96I59-2;E9PRK2;H0YEL9;H0YE96	8;5;3;2;1	Probable asparagine--tRNA ligase, mitochondrial	NARS2	24.3	54.089	477	1.3404	9	0.97159	9	1.2029	9	1.19154	9
C9JG87;Q9NYK5;Q9NYK5-2	1;1;1	39S ribosomal protein L39, mitochondrial	MRPL39	3.7	34.032	297	1.3401	1	0.989	1	1.1532	2	0.919118	2
O75531	2	Barrier-to-autointegration factor;Barrier-to-autointegration factor, N-terminally processed	BANF1	40.4	10.058	89	1.336	1	1.1299	1	0.95316	2	0.963391	2
Q9Y5Q9;H7BZV8;H7C143	3;1;1	General transcription factor 3C polypeptide 3	GTF3C3	3.4	101.27	886	1.3339	3	0.9946	3	1.1954	2	0.981643	2
Q14011;K7ENX8;K7ELV6;K7EJV5;K7ELT6;K7EJV1;K7EMY9;K7EPM4;K7ER40;K7EQR7;Q14011-2;D6W5Y5;K7EQX4;K7ENN6;K7EIF7;K7EQL0	4;3;3;3;3;3;3;3;3;3;3;3;1;1;1;1	Cold-inducible RNA-binding protein	CIRBP	33.1	18.648	172	1.3281	3	1.2696	3	1.452	3	1.07402	3
Q6GMV3	2	Putative peptidyl-tRNA hydrolase PTRHD1	PTRHD1	16.4	15.805	140	1.3261	1	0.99731	1	0.70704	2	0.785423	2
P02792;A0A087X1B9	5;4	Ferritin light chain	FTL	32.6	20.019	175	1.3244	12	1.0005	12	0.90186	15	0.856825	15
Q15542-2;Q15542	1;1	Transcription initiation factor TFIID subunit 5	TAF5	1.5	80.507	745	1.3215	1	0.9174	1	1.4133	2	0.829531	2
Q9UI30;F5GX77;Q9UI30-2;F5GYQ2	6;5;5;3	tRNA methyltransferase 112 homolog	TRMT112	59.2	14.199	125	1.321	4	1.0547	4	1.3928	5	1.10889	5
Q10570;E9PIM1;A0A087X101	11;2;2	Cleavage and polyadenylation specificity factor subunit 1	CPSF1	10	160.88	1443	1.3198	9	1.0381	9	1.8895	7	1.04552	7
Q13084;Q4TT37;A2IDC6;A2IDC7	4;3;3;2	39S ribosomal protein L28, mitochondrial	MRPL28	23.8	30.156	256	1.3197	3	0.86706	3	1.1426	3	0.97229	3
Q96SB4-4;Q96SB4;H3BLV9;Q96SB4-3;Q5R363;D6RBM8	7;7;7;7;7;2	SRSF protein kinase 1	SRPK1	12.7	72.383	639	1.318	4	1.1958	4	1.1188	4	1.04424	4
B1AMU7;B1AMU3;Q9Y3B2;R4GNH9;R4GMQ7;B1AMU4	2;2;2;1;1;1	Exosome complex component CSL4	EXOSC1	16.4	17.789	165	1.3151	2	1.1254	2	1.8926	1	1.03616	1
B9ZVN9;O95602	20;20	DNA-directed RNA polymerase;DNA-directed RNA polymerase I subunit RPA1	POLR1A	14.4	187.81	1659	1.3137	20	1.0967	20	1.5029	15	0.92302	15
Q6S8J3;P0CG38;P0CG39;Q9BYX7	9;7;5;4	POTE ankyrin domain family member E;POTE ankyrin domain family member I;POTE ankyrin domain family member J	POTEE;POTEI;POTEJ	10.1	121.36	1075	1.31	2	0.98873	2	0.97678	4	1.16044	4
E7EP32;P62873-2;Q9HAV0;P62879;P62873;B1AKQ8;C9JZN1;F6X3N5;F6UT28;C9JIS1;C9JXA5;C9JD14;F5H8J8;F5H100;P62879-2;B3KVK2;F5H0S8;P16520-2;E9PCP0;P16520	3;3;3;3;3;2;2;2;2;2;2;1;1;1;1;1;1;1;1;1	Guanine nucleotide-binding protein G(I)/G(S)/G(T) subunit beta-1;Guanine nucleotide-binding protein subunit beta-4;Guanine nucleotide-binding protein G(I)/G(S)/G(T) subunit beta-2	GNB2;GNB1;GNB4	10.5	32.408	296	1.3089	2	1.0218	2	1.0322	3	1.20818	3
P43490;A0A0C4DFS8	3;2	Nicotinamide phosphoribosyltransferase	NAMPT	7.7	55.52	491	1.3082	3	1.0204	3	0.69339	1	0.801539	1
Q7L0Y3;C9JVB6	2;1	Mitochondrial ribonuclease P protein 1	TRMT10C	6.7	47.346	403	1.3079	2	1.069	2	1.1414	3	0.960061	3
P10155-3;P10155-5;P10155-4;P10155;P10155-2;H0Y9N5;G5E9R9	8;8;8;8;3;2;1	60 kDa SS-A/Ro ribonucleoprotein	TROVE2	16.4	58.482	518	1.3078	7	0.92204	7	0.92236	6	0.819135	6
P56385	2	ATP synthase subunit e, mitochondrial	ATP5I	30.4	7.9331	69	1.3057	2	1.0171	2	1.4148	2	0.975039	2
Q96EL3	5	39S ribosomal protein L53, mitochondrial	MRPL53	65.2	12.107	112	1.3029	4	1.0684	4	1.5393	3	1.28338	3
P62995-3;P62995;H7BXF3;H7C2L4	3;3;2;1	Transformer-2 protein homolog beta	TRA2B	21.3	21.935	188	1.3027	5	0.65134	5	1.2767	5	1.13276	5
Q9NTK5;J3KQ32;Q9NTK5-3;Q9NTK5-2;C9JTK6;C9JCJ9	25;25;16;14;8;5	Obg-like ATPase 1	OLA1	76.5	44.743	396	1.3024	56	1.0175	56	1.0487	42	1.02549	42
Q969Q0	7	60S ribosomal protein L36a-like	RPL36AL	40.6	12.469	106	1.2974	3	0.53337	3	0.73075	1	0.382088	1
Q2NL82;I3L1Q5	9;4	Pre-rRNA-processing protein TSR1 homolog	TSR1	13.6	91.809	804	1.2952	9	1.0229	9	0.96627	6	0.934143	6
Q9H9J2	4	39S ribosomal protein L44, mitochondrial	MRPL44	16.6	37.535	332	1.2928	3	1.0295	3	1.1647	3	1.04361	3
Q9BUJ2-4;A0A0A0MRA5;B7Z4B8;Q9BUJ2-2;Q9BUJ2;M0R3F1;Q9BUJ2-3;M0QYZ0;M0R0K8;M0QYI8;M0R203;M0QYM5;M0QZV6	13;13;13;13;13;10;10;9;4;4;3;3;3	Heterogeneous nuclear ribonucleoprotein U-like protein 1	HNRNPUL1	21.6	84.793	756	1.2913	19	1.0863	19	1.2996	20	1.15089	20
Q00341;A0A024R4E5;Q00341-2;H0Y394;H7C0A4;C9JIZ1;C9J5E5;C9JZI8;H7C2D1;C9JHS7;C9JHZ8;C9JES8;H7BZC3;C9JT62;C9JK79;C9JMQ6;C9JQ82;C9JBS3;C9JEJ8;C9JHN6;C9JHS9;C9J739	26;26;22;18;9;7;6;5;5;4;4;4;4;3;3;2;2;2;2;2;1;1	Vigilin	HDLBP	26.8	141.45	1268	1.2892	19	1.348	19	1.1673	19	1.00737	19
Q9Y3B7;Q9Y3B7-2;Q9Y3B7-3;E9PQB6;H0YCD5	5;4;4;2;1	39S ribosomal protein L11, mitochondrial	MRPL11	29.7	20.683	192	1.2888	7	1.01	7	1.1552	5	0.922339	5
Q9BZE1;A6NHR2;S4R369	3;2;1	39S ribosomal protein L37, mitochondrial	MRPL37	9.9	48.117	423	1.2871	2	1	2	1.7838	1	1.11503	1
Q9H9Y6-5;Q9H9Y6-2;Q9H9Y6;Q9H9Y6-3;Q9H9Y6-4;F8WDS4;F8WAK7;F8WBB9;F8WCS3;C9JJG2;C9JS83	4;4;4;4;3;1;1;1;1;1;1	DNA-directed RNA polymerase I subunit RPA2	POLR1B	5.7	107.86	952	1.2851	3	0.98173	3	1.1934	2	0.939496	2
Q15046;Q15046-2;H3BVA8;J3KRL2;H3BPV7;H3BRC9	20;19;6;4;3;1	Lysine--tRNA ligase	KARS	35	68.047	597	1.2848	22	1.0433	22	1.155	24	1.08746	24
C9JQV0;Q9BRJ6;H7C0T1;H7C2R9	3;3;1;1	Uncharacterized protein C7orf50	C7orf50	28.6	21.883	192	1.2818	3	1.0643	3	1.6733	2	1.04426	2
O43237;J3KRI4;O43237-2;J3KRZ2	3;2;2;1	Cytoplasmic dynein 1 light intermediate chain 2	DYNC1LI2	8.9	54.099	492	1.2799	2	1.0613	2	NaN	0	NaN	0
O95487-2;O95487;O95487-3	8;8;8	Protein transport protein Sec24B	SEC24B	7.3	133.63	1233	1.2791	6	1.0934	6	1.0722	5	1.06151	5
O15116;E5RJ47;E5RH18	2;1;1	U6 snRNA-associated Sm-like protein LSm1	LSM1	17.3	15.179	133	1.2784	2	1.0969	2	1.1241	2	0.870019	2
Q8N5L8	2	Ribonuclease P protein subunit p25-like protein	RPP25L	19.6	17.631	163	1.2775	2	0.9428	2	1.2207	2	0.965437	2
Q9H0R6	3	Glutamyl-tRNA(Gln) amidotransferase subunit A, mitochondrial	QRSL1	7.4	57.46	528	1.2769	3	1.1434	3	1.2431	1	1.1278	1
D6RDA2;P35659;H0Y8X0;P35659-2;B4DFG0;D6R9L5	3;3;2;2;2;1	Protein DEK	DEK	23	14.156	122	1.2752	3	1.0851	3	0.83605	5	1.19244	5
Q9H2W6;A0A087WT90	3;1	39S ribosomal protein L46, mitochondrial	MRPL46	16.8	31.705	279	1.2746	4	1.0278	4	1.2852	3	1.27732	3
Q6P1L8	2	39S ribosomal protein L14, mitochondrial	MRPL14	16.6	15.947	145	1.2743	2	0.98796	2	1.3854	2	1.25867	2
J3KP15;Q01130;J3QL05;Q01130-2;Q9BRL6-2;Q9BRL6	5;5;4;4;2;2	Serine/arginine-rich splicing factor 2	SRSF2	42.1	15.371	133	1.2722	7	1.0413	7	1.3475	8	1.48803	8
H3BUR4;Q9ULX3	3;3	RNA-binding protein NOB1	NOB1	50	7.5737	66	1.2719	2	1.0404	2	NaN	0	NaN	0
E5RIZ4;Q9P015;E5RHF4	3;3;2	39S ribosomal protein L15, mitochondrial	MRPL15	12.7	27.236	237	1.2687	3	1.2762	3	1.2388	3	1.14365	3
P47897;P47897-2;H7C0R3;C9J165;F2Z2V6	34;31;11;11;4	Glutamine--tRNA ligase	QARS	54.8	87.798	775	1.266	51	1.0588	51	1.207	42	1.00558	42
O43716;H0YIV9;F8VRU3	3;3;2	Glutamyl-tRNA(Gln) amidotransferase subunit C, mitochondrial	GATC	22.1	15.086	136	1.266	2	1.0201	2	1.3555	3	1.181	3
Q13155;A8MU58;F8W950	6;5;5	Aminoacyl tRNA synthase complex-interacting multifunctional protein 2	AIMP2	31.2	35.348	320	1.2625	6	1.038	6	1.2879	10	1.0416	10
F5H669;Q8N684-2;Q8N684;Q8N684-3	1;1;1;1	Cleavage and polyadenylation specificity factor subunit 7	CPSF7	6.7	41.265	374	1.2598	5	1.2268	5	1.3357	4	0.72685	4
E9PQV6;Q9BPX6-5;Q9BPX6-4;Q9BPX6-2;Q9BPX6;Q9BPX6-3;F6XEV2	1;1;1;1;1;1;1	Calcium uptake protein 1, mitochondrial	MICU1	6.1	28.15	246	1.2587	1	1.0426	1	1.0038	3	1.30078	3
Q9NZN3;A0A0C4DH83;C9JDQ8;C9J2Z4;C9JC03;Q9H4M9;A0A024R571	3;3;2;2;2;2;2	EH domain-containing protein 3;EH domain-containing protein 1	EHD3;EHD1	6.5	60.886	535	1.2562	2	1.2757	2	0.79582	2	0.979336	2
Q13151	11	Heterogeneous nuclear ribonucleoprotein A0	HNRNPA0	40.7	30.84	305	1.2562	23	1.2446	23	1.4954	23	1.2783	23
Q9P2I0	1	Cleavage and polyadenylation specificity factor subunit 2	CPSF2	1.7	88.486	782	1.2556	2	0.91129	2	1.674	3	1.12249	3
Q9NXG2;H3BNW0	7;1	THUMP domain-containing protein 1	THUMPD1	24.9	39.315	353	1.2548	8	1.1407	8	1.2572	7	1.26499	7
Q7Z7H8;Q7Z7H8-2	2;2	39S ribosomal protein L10, mitochondrial	MRPL10	11.1	29.282	261	1.2545	2	4.6827	2	1.1081	1	1.20878	1
O94903;E5RFX7;E5RG77	3;1;1	Proline synthase co-transcribed bacterial homolog protein	PROSC	11.3	30.344	275	1.254	2	1.3604	2	0.92049	2	0.901144	2
Q9BV44;H7C3J3;C9J9V2;H7C0R6	5;3;2;1	THUMP domain-containing protein 3	THUMPD3	12.6	57.002	507	1.2539	8	1.2015	8	1.088	7	0.945716	7
Q9BUF5;K7ESM5;K7EL29;K7EN98;K7ESQ3;K7EQT3;K7EJ64;K7ERA8;K7EJZ4;K7ES63;K7EPE5	11;10;4;3;2;2;2;2;2;2;2	Tubulin beta-6 chain	TUBB6	37.2	49.857	446	1.2538	4	1.129	4	1.1883	1	0.89823	1
Q01081;Q01081-2;M0QYK5;Q01081-3;M0R2N4;Q8WU68-3;Q8WU68-2;Q8WU68;K7EJH3;K7EJM7;Q01081-4	7;6;4;4;4;4;4;4;2;2;2	Splicing factor U2AF 35 kDa subunit;Splicing factor U2AF 26 kDa subunit	U2AF1;U2AF1L4	25.4	27.872	240	1.2515	7	0.96647	7	1.1795	8	0.891822	8
P05455;E7ERC4;E9PGX9;E9PFL9	28;15;11;9	Lupus La protein	SSB	52.2	46.836	408	1.2499	73	1.0299	73	1.1035	69	1.17008	69
A0A087WVZ9;P19388;A0A087WWX0;A0A0A0MQR7	4;4;3;3	DNA-directed RNA polymerases I, II, and III subunit RPABC1	POLR2E	24.5	21.459	184	1.2464	5	0.93401	5	1.379	3	1.30195	3
P14868;P14868-2;H7BZ35;C9J7S3;C9JLC1;C9JQM9;H7C278	23;21;9;8;8;5;4	Aspartate--tRNA ligase, cytoplasmic	DARS	51.9	57.136	501	1.2463	22	1.0221	22	1.166	22	1.05364	22
A0A087WTT1;P11940-2;P11940;E7EQV3;E7ERJ7;H0YAR2;H0YBN4;H0YAP2;Q4VXU2;E5RGH3;E5RH24;E5RJB9;H0YB86;Q4VXU2-2;E5RHG7;E5RGC4;E5RFD8;Q96DU9-2;Q96DU9	15;15;15;14;14;10;7;5;5;4;4;4;4;3;2;1;1;1;1	Polyadenylate-binding protein 1	PABPC1	28.7	58.535	522	1.2445	15	1.0265	15	0.79034	11	0.796876	11
O60832;O60832-2;H7C2Q2;C9IYT0;H7C2Q9;H7C0M1	5;4;2;2;1;1	H/ACA ribonucleoprotein complex subunit 4	DKC1	10.5	57.673	514	1.2421	4	0.9088	4	0.92127	4	1.01455	4
P54136;P54136-2;E5RJM9;E5RH09	27;26;3;2	Arginine--tRNA ligase, cytoplasmic	RARS	47.7	75.378	660	1.2417	28	1.0496	28	1.0908	28	0.996314	28
Q9Y3F4;Q9Y3F4-2;H0YH33	12;12;5	Serine-threonine kinase receptor-associated protein	STRAP	44.9	38.438	350	1.2408	13	1.2161	13	1.0607	15	1.00212	15
P04350;M0R278;M0R1I1	17;5;2	Tubulin beta-4A chain	TUBB4A	57.9	49.585	444	1.2406	4	1.0345	4	0.99708	3	1.14448	3
Q13595-2;Q13595-4;Q13595-3;Q13595	2;2;2;2	Transformer-2 protein homolog alpha	TRA2A	20.4	12.951	113	1.2395	2	1.0431	2	0.9263	2	1.18044	2
H7C2P7;Q16540;A6NJD9;A8MVT4;A8MYK1	3;3;3;3;3	39S ribosomal protein L23, mitochondrial	MRPL23	31.4	13.669	118	1.2388	4	1.0392	4	1.3818	5	1.21274	5
Q9BPX5	2	Actin-related protein 2/3 complex subunit 5-like protein	ARPC5L	16.3	16.941	153	1.2378	2	1.2716	2	0.81829	2	0.915835	2
P10619-2;P10619;X6R5C5;X6R8A1	2;2;2;2	Lysosomal protective protein;Lysosomal protective protein 32 kDa chain;Lysosomal protective protein 20 kDa chain	CTSA	5.2	52.488	463	1.2359	1	1.1418	1	1.7329	2	1.17761	2
Q9H1Z9;A0A087X235;A0A087WWT4	1;1;1	Tetraspanin-10	TSPAN10	2.3	36.498	355	1.2352	2	1.1529	2	1.4053	2	1.04174	2
D6RFI1;Q16643;Q16643-3;D6R9W4;Q16643-2;D6RCR4	5;5;5;4;3;2	Drebrin	DBN1	51.6	13.437	124	1.2351	8	1.0876	8	0.86436	8	1.05321	8
E9PN51;F8W9K7;E9PKH6;E9PPW7;O00217	1;1;1;1;1	NADH dehydrogenase [ubiquinone] iron-sulfur protein 8, mitochondrial	NDUFS8	8.2	12.405	110	1.2328	2	0.88024	2	1.1468	1	1.19466	1
Q9NRP0;Q9NRP0-2;A0A087WUD3	2;2;1	Oligosaccharyltransferase complex subunit OSTC	OSTC	13.4	16.829	149	1.2243	1	1.1468	1	1.3489	2	1.03177	2
O75494-5;Q5JRI1;O75494-4;O75494-6;O75494-3;O75494-2;O75494;Q6IQ42;R4GMP8;Q8WXF0	4;4;4;4;4;4;4;2;1;1	Serine/arginine-rich splicing factor 10	SRSF10;FUSIP1	30.3	20.117	165	1.2208	6	1.0909	6	1.1957	6	1.99708	6
O00488	1	Zinc finger protein 593	ZNF593	10.4	15.199	134	1.2206	2	0.98957	2	2.2281	1	1.27827	1
Q9HAV4;H0Y9I3	2;1	Exportin-5	XPO5	1.7	136.31	1204	1.2197	2	1.0648	2	0.73591	1	0.85778	2
P63172;Q5VTU3	5;3	Dynein light chain Tctex-type 1	DYNLT1	79.6	12.452	113	1.2188	6	1.055	6	1.4342	7	1.09612	7
Q92621	3	Nuclear pore complex protein Nup205	NUP205	1.8	227.92	2012	1.2184	2	1.2992	2	1.1235	4	0.744214	4
P49755;G3V2K7	3;1	Transmembrane emp24 domain-containing protein 10	TMED10	12.3	24.976	219	1.2181	3	1.0086	3	1.3628	3	0.963577	3
P09661;H0YKK0;H0YMA0;H0YLR3	11;7;5;4	U2 small nuclear ribonucleoprotein A	SNRPA1	45.9	28.415	255	1.2178	16	1.0737	17	1.4141	16	1.23191	16
P62318-2;P62318;H3BT13	4;4;2	Small nuclear ribonucleoprotein Sm D3	SNRPD3	40	13.291	120	1.2175	6	1.0387	6	1.5106	10	1.24234	10
P08579	9	U2 small nuclear ribonucleoprotein B	SNRPB2	48	25.486	225	1.2156	16	1.0805	16	1.4299	18	1.31914	18
Q15392;Q3LIE7;Q15392-2	5;4;4	Delta(24)-sterol reductase	DHCR24;Nbla03646	10.3	60.101	516	1.2122	2	1.2891	2	1.2214	4	1.12328	4
P15121;E9PCX2	4;2	Aldose reductase	AKR1B1	13.6	35.853	316	1.2115	2	1.0757	2	0.67745	2	0.827472	2
Q14684-2;Q14684	2;2	Ribosomal RNA processing protein 1 homolog B	RRP1B	3.8	82.175	740	1.2114	2	0.98827	2	1.5758	1	0.940734	1
Q13393-4;Q13393-2;Q13393;C9IY79;Q13393-3	2;2;2;1;1	Phospholipase D1	PLD1	3.3	112.18	971	1.2091	2	0.90614	2	1.1507	2	1.16074	2
P49411;H3BNU3	27;2	Elongation factor Tu, mitochondrial	TUFM	60.4	49.541	452	1.2089	57	0.95683	56	1.1926	54	1.13876	54
Q9H2M9	2	Rab3 GTPase-activating protein non-catalytic subunit	RAB3GAP2	2.3	155.98	1393	1.2078	2	1.0333	2	0.80104	2	0.840901	2
Q8TEQ6	4	Gem-associated protein 5	GEMIN5	3.1	168.59	1508	1.2067	4	1.189	4	1.182	3	1.02044	3
P49406;S4R3W9;A0A0A0MRF4;S4R455	6;5;4;2	39S ribosomal protein L19, mitochondrial	MRPL19	18.2	33.535	292	1.2061	4	0.97829	4	1.1764	3	0.936505	3
Q9BZZ5-3;Q9BZZ5-2;G3V1C3;Q9BZZ5-6;Q9BZZ5;Q9BZZ5-1;Q9BZZ5-5;H0YER7;E9PQK6	4;4;4;4;4;3;3;2;1	Apoptosis inhibitor 5	API5	13	50.309	445	1.2055	3	1.203	3	0.89156	4	0.991768	4
X6RA56;O75935-3;A0A0A0MRV8;X6RLR1;O75935-2;O75935;X6RCK5	2;2;2;2;2;2;1	Dynactin subunit 3	DCTN3	10.6	16.091	142	1.2042	2	0.99048	2	NaN	0	NaN	0
Q9H2U1-2;Q9H2U1;Q9H2U1-3;E7EWK3;A0A0G2JQU7;A0A0G2JRP3;H7C514;H7C5F5;Q6P158-2;Q6P158	20;20;18;15;6;3;3;3;1;1	Probable ATP-dependent RNA helicase DHX36	DHX36	24.8	113.15	994	1.2038	21	1.1981	22	1.4051	21	1.1747	21
P49720;A0A087WUL2;A0A087WXQ8;A0A087WY10	5;4;3;3	Proteasome subunit beta type-3	PSMB3	31.7	22.949	205	1.2037	9	1.0559	9	1.2453	8	1.07913	8
Q9H0D6-2;Q9H0D6	4;4	5-3 exoribonuclease 2	XRN2	6.4	99.96	874	1.2037	3	0.97767	3	1.2705	4	0.920556	4
Q99459	6	Cell division cycle 5-like protein	CDC5L	11.3	92.25	802	1.2014	7	1.0964	7	1.4033	5	0.986777	5
P07814;V9GYZ6;V9GZ76	61;38;5	Bifunctional glutamate/proline--tRNA ligase;Glutamate--tRNA ligase;Proline--tRNA ligase	EPRS	47.8	170.59	1512	1.1988	131	1.0482	131	1.1199	91	1.05502	91
P62306;A0A0B4J254;F8W0W6	6;3;3	Small nuclear ribonucleoprotein F	SNRPF	48.8	9.7251	86	1.1987	5	1.0245	5	1.4454	6	1.31409	6
Q13428-3;Q13428-8;Q13428;Q13428-4;Q13428-2;Q13428-7;E7ETY2;J3KQ96;Q13428-6;Q13428-5;H0YA99;H0YAB7	31;30;30;30;29;29;29;28;28;23;5;1	Treacle protein	TCOF1	24	152.2	1489	1.1971	53	0.91916	53	1.8686	42	0.936067	42
Q92541	2	RNA polymerase-associated protein RTF1 homolog	RTF1	3.7	80.313	710	1.1969	2	0.96613	2	1.4988	1	1.03174	1
Q9UQ35;Q9UQ35-2;I3L3Q8;I3L4U6	16;3;2;1	Serine/arginine repetitive matrix protein 2	SRRM2	8.1	299.61	2752	1.1969	26	0.33701	26	1.9792	13	0.686201	13
H3BPR2	1	Nucleoside diphosphate kinase	NME3	21.2	9.2834	85	1.1968	2	1.1618	2	0.95952	2	1.16971	2
Q49AN9;F5H013;P62308;A8MWD9;C9JVQ0	2;2;2;2;1	Small nuclear ribonucleoprotein G;Small nuclear ribonucleoprotein G-like protein	SNRPG	29.7	7.1013	64	1.1966	3	1.0174	3	1.4942	3	1.35564	3
Q5JRC6;Q8IWS0-5;Q8IWS0-3;Q8IWS0;A0A0D9SGE8;Q8IWS0-4;Q8IWS0-2	3;3;3;3;3;2;2	PHD finger protein 6	PHF6	8.3	36.43	324	1.1959	3	1.0015	3	0.97851	2	0.90212	2
P36915-2;P36915	2;2	Guanine nucleotide-binding protein-like 1	GNL1	6.5	47.306	430	1.1955	2	0.99728	2	1.1457	3	0.733999	3
P57740-2;P57740;P57740-3	2;2;1	Nuclear pore complex protein Nup107	NUP107	2.5	103.17	896	1.1954	2	0.98924	2	0.97755	1	0.97144	1
P11216;H0Y4Z6;P11217-2;P11217	5;1;1;1	Glycogen phosphorylase, brain form	PYGB	7.2	96.695	843	1.1949	5	1.6161	5	0.96767	3	1.34338	3
Q99714;Q99714-2;Q5H928	14;12;8	3-hydroxyacyl-CoA dehydrogenase type-2	HSD17B10	83.1	26.923	261	1.1945	22	1.0581	22	1.1833	20	1.00886	20
O00505;H0Y4S9	11;3	Importin subunit alpha-4	KPNA3	32.8	57.81	521	1.1942	7	1.1251	7	1.1786	7	0.996512	7
Q9NUQ6-2;Q9NUQ6;Q9NUQ6-4;Q9NUQ6-3;F8VZ02;C9JGM8;F8W6C2;F2Z2S1;C9JKE4;F8VT91;C9JW67;A0A0A0MSG5;B8ZZZ7;C9IZC3;C9J8M7;Q4ZFW0;F8WAV0	8;7;6;6;5;5;5;4;4;4;4;4;4;3;3;1;1	SPATS2-like protein	SPATS2L	21.1	54.178	489	1.1934	13	0.92994	13	1.0819	12	0.945984	12
Q969H8;M0QYN0;M0QXF7	5;4;3	UPF0556 protein C19orf10	C19orf10	30.1	18.795	173	1.1925	4	1.0233	4	0.91384	5	0.893975	5
Q9P2J5;Q9P2J5-2;Q9P2J5-3;A0A087WXY1	29;28;11;3	Leucine--tRNA ligase, cytoplasmic	LARS	29.5	134.46	1176	1.1912	24	1.0166	24	1.0934	22	1.03322	22
Q9Y4G6;H0YMT1;H0YN01	13;8;2	Talin-2	TLN2	6	271.61	2542	1.1909	1	0.99536	1	0.95629	2	1.01774	2
Q9Y4E8-2;Q9Y4E8-3;Q9Y4E8;Q13107-2;G5E9A6;Q13107;P51784	3;3;3;1;1;1;1	Ubiquitin carboxyl-terminal hydrolase 15	USP15	3.3	109.3	952	1.1904	3	1.0568	3	1.0205	3	1.0536	3
Q32P41	4	tRNA (guanine(37)-N1)-methyltransferase	TRMT5	8.8	58.246	509	1.1898	3	0.88443	3	1.2919	3	1.20758	3
E7EN77;Q15021	5;5	Condensin complex subunit 1	NCAPD2	7.1	102.65	919	1.1897	4	0.99582	4	1.1706	4	1.00334	4
Q9BPW8;F8WCR5;H7C2U6	2;1;1	Protein NipSnap homolog 1	NIPSNAP1	13.4	33.31	284	1.1893	2	0.97849	2	0.97197	2	0.82905	2
O94855;O94855-2;E9PC44;E9PDM8	6;6;5;5	Protein transport protein Sec24D	SEC24D	6.8	113.01	1032	1.1884	5	1.1311	5	0.99003	5	0.849185	5
Q8TBX8-3;Q8TBX8;Q8TBX8-2;H0YIJ6;F8VNT5;F8VU68	6;6;4;2;2;2	Phosphatidylinositol 5-phosphate 4-kinase type-2 gamma	PIP4K2C	17.6	45.053	403	1.1879	4	1.0488	4	1.1027	4	0.947688	4
Q7L2E3-3;H7BXY3;Q7L2E3;Q7L2E3-2	25;25;25;25	Putative ATP-dependent RNA helicase DHX30	DHX30	28.7	129.44	1155	1.1872	22	0.91654	22	0.99584	22	1.05716	22
P25788-2;P25788;G3V4X5	3;3;2	Proteasome subunit alpha type-3	PSMA3	12.9	27.647	248	1.1869	3	1.0286	3	1.1205	3	0.944644	3
O75348;O95670-2;F2Z307;O95670	2;1;1;1	V-type proton ATPase subunit G 1;V-type proton ATPase subunit G 2	ATP6V1G1;ATP6V1G2;ATP6V1G2-DDX39B	22	13.757	118	1.1866	2	0.93338	2	1.0954	2	0.950751	2
P62304;A6NHK2	3;1	Small nuclear ribonucleoprotein E	SNRPE	52.2	10.803	92	1.1857	6	1.0061	6	1.4637	6	1.32631	6
P28070	3	Proteasome subunit beta type-4	PSMB4	12.5	29.204	264	1.1851	6	1.0586	6	1.5193	3	1.10946	3
P78362;P78362-2;H7C521;C9J2M4;C9JWF7;H7C5L6;F8WBW4;Q9UPE1-2;A8MPP7;Q9UPE1-3;A8MPY5;Q9UPE1-4;Q9UPE1;E7ETV6;H7C2I2	11;11;4;3;3;3;2;2;2;2;2;2;2;2;1	SRSF protein kinase 2;SRSF protein kinase 2 N-terminal;SRSF protein kinase 2 C-terminal	SRPK2	18.6	77.526	688	1.185	13	1.2804	13	0.9981	11	1.45779	11
H0YG54;H0YGR4;Q9Y3B8-2;Q9Y3B8-3;Q9Y3B8	1;1;1;1;1	Oligoribonuclease, mitochondrial	REXO2	9.6	21.848	188	1.1846	4	1.0801	4	0.65332	2	0.856018	2
Q8N5K1;I3L1N9	2;1	CDGSH iron-sulfur domain-containing protein 2	CISD2	14.8	15.278	135	1.1843	2	1.0546	2	0.92043	2	0.869943	2
J3QLE5;P14678-2;P63162;P14678;P63162-2;A8MT02;P14678-3;J3KRY3;S4R3P3	8;8;8;8;8;8;8;5;5	Small nuclear ribonucleoprotein-associated proteins B and B;Small nuclear ribonucleoprotein-associated protein N	SNRPN;SNRPB	35.5	17.546	169	1.1837	9	1.0282	9	1.4029	11	1.33736	11
Q15008;Q15008-4;Q15008-3;Q15008-2;H7C531;C9J0E9;C9J7B7	7;7;6;6;3;3;2	26S proteasome non-ATPase regulatory subunit 6	PSMD6	20.3	45.531	389	1.1829	5	0.89703	5	1.1166	5	1.20553	5
P17096;P17096-3	3;3	High mobility group protein HMG-I/HMG-Y	HMGA1	23.4	11.676	107	1.182	3	0.98116	3	1.7839	5	1.1485	5
P60900;G3V5Z7;G3V295;G3V3U4;G3V3I1;P60900-2;P60900-3;G3V4S5;G3V2S7;H0YJC4	7;7;6;5;5;5;2;1;1;1	Proteasome subunit alpha type-6;Proteasome subunit alpha type	PSMA6	33.7	27.399	246	1.1813	7	0.99586	7	1.3371	8	1.03813	8
P28074;P28074-3;H0YJM8;P28074-2	9;7;3;3	Proteasome subunit beta type-5	PSMB5	36.9	28.48	263	1.1797	9	1.057	9	1.1893	8	1.01269	8
Q96HQ2-2;Q96HQ2	2;2	CDKN2AIP N-terminal-like protein	CDKN2AIPNL	32.9	9.5086	85	1.1794	2	0.9299	2	0.93927	2	0.863782	2
P63261;I3L3I0;I3L1U9;I3L4N8;K7EM38;I3L3R2;J3KT65	21;13;13;11;10;10;10	Actin, cytoplasmic 2;Actin, cytoplasmic 2, N-terminally processed	ACTG1	64.8	41.792	375	1.1787	1	1.0035	1	0.90946	2	1.1086	2
P62316;P62316-2;K7ERG4;K7EJB5	8;7;4;3	Small nuclear ribonucleoprotein Sm D2	SNRPD2	61.9	13.527	118	1.1775	10	1.0297	10	1.5425	12	1.28401	12
P07108;P07108-3;B8ZWD1;P07108-2;P07108-4;A0A0A0MTI5;P07108-5;P07108-6	5;5;5;5;5;5;5;1	Acyl-CoA-binding protein	DBI	52.9	10.044	87	1.1774	4	1.0149	4	0.79129	5	0.844452	5
O00629;H7C4F6	13;3	Importin subunit alpha-3	KPNA4	36.3	57.886	521	1.1773	15	1.0193	15	1.1274	14	1.08998	14
B1AH49;P25325;P25325-2	2;2;2	3-mercaptopyruvate sulfurtransferase	MPST	12.9	24.982	224	1.1763	1	1.14	1	0.71193	2	1.00372	2
Q92900-2;Q92900	4;4	Regulator of nonsense transcripts 1	UPF1	3.8	123.03	1118	1.1763	3	1.0947	3	0.9257	2	0.981065	2
P41252;A0A0A0MSX9;J3KR24;Q5TCD1;Q5TCC6;Q5TCC9	39;38;34;10;4;2	Isoleucine--tRNA ligase, cytoplasmic	IARS	38.7	144.5	1262	1.1761	40	1.0074	40	1.1964	34	1.05741	34
P24534;F2Z2G2;C9JZW3;F8WF65	3;2;2;1	Elongation factor 1-beta	EEF1B2	26.7	24.763	225	1.1753	3	1.0227	3	1.3427	3	1.0277	3
P18084	1	Integrin beta-5	ITGB5	1.8	88.053	799	1.1745	2	0.98618	2	0.84597	1	0.920217	1
Q9Y333	3	U6 snRNA-associated Sm-like protein LSm2	LSM2	51.6	10.834	95	1.1727	4	0.93697	4	1.1175	4	0.985125	4
P31153-2;P31153;Q00266	3;3;1	S-adenosylmethionine synthase isoform type-2	MAT2A	13.7	32.964	299	1.1725	1	1.2204	1	1.7372	3	1.13915	3
P62633-2;P62633;P62633-7;P62633-3;P62633-8;P62633-5;P62633-4;P62633-6	5;5;4;4;4;4;4;4	Cellular nucleic acid-binding protein	CNBP	36.5	18.742	170	1.1698	8	1.1808	8	1.8248	8	1.39363	8
Q96HR8-2;Q96HR8	3;3	H/ACA ribonucleoprotein complex non-core subunit NAF1	NAF1	10.5	41.894	389	1.168	4	0.83785	4	0.99465	4	0.905961	4
Q9H814	2	Phosphorylated adapter RNA export protein	PHAX	4.8	44.402	394	1.1667	3	1.1048	3	0.74484	4	1.20237	4
A0A087WZZ5;Q13435;E9PPJ0;E9PJT3;E9PJ04;H0YCG1;H0YEX5;E9PIL8	7;7;6;3;3;3;2;1	Splicing factor 3B subunit 2	SF3B2	8.3	97.584	871	1.1667	6	0.89462	6	1.6328	4	0.885818	4
Q9Y3B4	4	Pre-mRNA branch site protein p14	SF3B14	39.2	14.585	125	1.1663	4	0.89523	4	1.4604	4	0.97972	4
P78559;P78559-2;E9PGC8	13;13;13	Microtubule-associated protein 1A;MAP1A heavy chain;MAP1 light chain LC2	MAP1A	5.8	305.48	2803	1.1659	10	1.1119	10	1.79	6	0.772618	6
C9JLU1;P52434;P52434-3;P52434-2;P52434-4;P52434-5	3;3;2;2;2;1	DNA-directed RNA polymerases I, II, and III subunit RPABC3	POLR2H	27.7	16.925	148	1.1659	3	0.98596	3	1.5689	5	1.21272	5
I6L9B1;O43491-2;E9PII3;O43491-3;E9PK52;O43491-4;E9PHY5;O43491;E9PQD2;B2RB02;Q9Y2J2-3;A8K968;Q9Y2J2-2;Q9Y2J2-4;A0A0A0MRA8;Q9Y2J2;E9PJP4;E9PQN0;E9PRG1;E9PIG0;J3QS55;J3KT37;H0Y5B0	20;20;20;20;20;20;20;20;4;4;4;4;4;4;4;4;3;3;3;3;2;1;1	Band 4.1-like protein 2	EPB41L2	32.4	71.642	633	1.1656	37	0.89923	37	0.90908	43	1.24003	43
O60841;A0A087WUT6	39;39	Eukaryotic translation initiation factor 5B	EIF5B	33.9	138.83	1220	1.1651	50	1.0212	50	1.0346	44	1.04786	44
P51991;P51991-2;H7C1J8	15;12;1	Heterogeneous nuclear ribonucleoprotein A3	HNRNPA3	40.2	39.594	378	1.1645	22	1.2497	22	1.6554	28	1.35248	28
D6REA0;O75879;H0Y8G7;H0Y9F2;B4E0P2;D6RDU9	2;2;1;1;1;1	Glutamyl-tRNA(Gln) amidotransferase subunit B, mitochondrial	PET112	9.9	57.653	516	1.1632	2	1.0085	2	0.96649	2	1.0945	2
Q8TBQ9	2	Protein kish-A	TMEM167A	25	8.0598	72	1.1611	1	1.1713	1	1.0532	2	0.874049	2
P52758;H0YBX3;H0YB34	2;1;1	Ribonuclease UK114	HRSP12	19.7	14.494	137	1.1595	2	1.1649	2	0.92633	2	0.964785	2
Q9NX24;D6RC52;D6RCB9;H0YC83;J3QSY4	3;2;2;1;1	H/ACA ribonucleoprotein complex subunit 2	NHP2	25.5	17.201	153	1.1586	3	0.91588	3	1.1912	3	0.965437	3
Q9P287-4;Q9P287-3;Q9P287;Q9P287-2	3;3;3;3	BRCA2 and CDKN1A-interacting protein	BCCIP	16.1	33.242	292	1.158	4	1.048	4	1.0155	4	0.978091	4
Q9Y224;G3V4C6;H0YJB9;G3V4E7	6;3;2;1	UPF0568 protein C14orf166	C14orf166	34	28.068	244	1.1579	5	1.0842	5	1.0668	6	0.889284	6
P56192;P56192-2;H0YHV5;F5H2V6;F8VS26;F8W0M7;F8W0S4;F8VZZ9;H0YIP0;H0YIC2;F8VPL7;H0YHL6;H0YI94;H0YI27	21;16;7;5;3;3;3;3;3;1;1;1;1;1	Methionine--tRNA ligase, cytoplasmic	MARS	35.8	101.11	900	1.1578	24	0.99439	24	1.1525	22	1.01343	22
P63272;J3KSQ6;J3QR04;D3DTZ5;J3QSB9	2;1;1;1;1	Transcription elongation factor SPT4	SUPT4H1	21.4	13.193	117	1.1558	2	1.0419	2	1.713	2	1.07519	2
D6RE67;D6RC31;D6RA57;Q96EY4;H0Y9X1	2;2;2;2;2	Translation machinery-associated protein 16	TMA16	22.7	10.377	88	1.1558	2	0.94694	2	2.0556	2	1.22287	2
Q8WVC0-2;Q8WVC0	2;2	RNA polymerase-associated protein LEO1	LEO1	4.1	68.003	606	1.1557	2	1.0562	2	1.286	1	1.06074	1
Q16777;Q6FI13;Q99878;Q96KK5;Q9BTM1;Q93077;Q7L7L0;P20671;P0C0S8;P04908;H0YFX9	4;4;3;3;3;3;3;3;3;3;2	Histone H2A type 2-C;Histone H2A type 2-A;Histone H2A type 1-J;Histone H2A type 1-H;Histone H2A.J;Histone H2A type 1-C;Histone H2A type 3;Histone H2A type 1-D;Histone H2A type 1;Histone H2A type 1-B/E;Histone H2A	HIST2H2AC;HIST2H2AA3;HIST1H2AJ;HIST1H2AH;H2AFJ;HIST1H2AC;HIST3H2A;HIST1H2AD;HIST1H2AG;HIST1H2AB	49.6	13.988	129	1.1551	7	0.92623	7	1.3405	5	1.27678	5
Q92572;F5H459	9;6	AP-3 complex subunit sigma-1	AP3S1	51.8	21.732	193	1.155	7	0.8377	7	1.4751	6	0.984931	6
O43143	20	Putative pre-mRNA-splicing factor ATP-dependent RNA helicase DHX15	DHX15	30.8	90.932	795	1.1547	21	1.0024	21	0.91452	21	0.846167	21
P62314;J3QLI9;J3QLR7	5;3;1	Small nuclear ribonucleoprotein Sm D1	SNRPD1	54.6	13.281	119	1.1533	18	0.94629	18	1.2939	24	1.24231	24
E7ES33;Q16181-2;Q16181;E7EPK1;G3V1Q4;H0Y3Y4;Q5JXL7;Q6ZU15	7;7;7;7;6;5;2;1	Septin-7	2016-09-07	21.3	48.715	417	1.1528	6	1.0847	6	1.0626	7	0.972668	7
Q86V81;E9PB61	3;3	THO complex subunit 4	ALYREF	19.5	26.888	257	1.1527	6	1.1733	6	2.2519	4	1.0042	4
Q99627-2;E9PGT6;Q99627;H7C3S9	3;3;3;2	COP9 signalosome complex subunit 8	COPS8	26.2	17.909	160	1.1527	3	0.9986	3	1.3345	4	1.15109	4
F2Z2Y6;O95777;C9JNV3;C9JIZ0	4;4;3;2	N-alpha-acetyltransferase 38, NatC auxiliary subunit	NAA38	82.1	7.3713	67	1.1522	3	0.9352	3	1.1558	4	0.973615	4
H7BXE3;Q9NWH9;H0YLW7;H0YMW8;H0YNF3;H0YMR6;H0YLE6;H0YL55;H7C3F4;Q9NWH9-3	2;2;1;1;1;1;1;1;1;1	SAFB-like transcription modulator	SLTM	6.8	48.848	453	1.1517	2	1.2183	2	1.4147	2	1.27691	2
P63208;E5RJR5;E7ERH2;F8W8N3;P63208-2;E5RGM3	6;6;4;4;4;3	S-phase kinase-associated protein 1	SKP1	40.5	18.658	163	1.1517	6	0.99859	6	1.1659	8	1.03486	8
C9JDH9;C9J6L2;C9JCC0;C9J232;H7C279;O00506-3;Q9P289-2;O00506-2;Q8NBY1;Q9P289;O00506;B4E0Y9	1;1;1;1;1;1;1;1;1;1;1;1	Serine/threonine-protein kinase 25;Serine/threonine-protein kinase MST4	STK25;MST4	10.1	16.366	148	1.1492	2	0.99391	2	1.0801	1	0.945358	1
P52701-4;A0A087WWJ1;P52701-2;P52701-3;P52701	3;3;3;3;3	DNA mismatch repair protein Msh6	MSH6	3.3	119.79	1058	1.1491	3	1.2427	3	1.1614	4	1.07102	4
P52294;C9JYI4;H0Y3K0;C9J352;C9JWD9;F2Z3G4;C9J4U1	5;3;1;1;1;1;1	Importin subunit alpha-5	KPNA1	12.6	60.221	538	1.148	2	1.0215	2	0.88303	2	1.03637	2
P98179	5	Putative RNA-binding protein 3	RBM3	47.8	17.17	157	1.1476	7	1.2022	7	1.2033	8	0.960061	8
CON__P08727;P08727;C9JM50;K7EMS3;CON__P19001	21;20;10;7;7	Keratin, type I cytoskeletal 19	KRT19	60	44.091	400	1.1453	20	1.0059	20	0.99574	25	0.993246	25
Q9P035;Q9P035-2;H3BPZ1;H3BS72;H3BMZ1;H3BRL8	3;2;2;2;1;1	Very-long-chain (3R)-3-hydroxyacyl-[acyl-carrier protein] dehydratase 3	PTPLAD1	12.7	43.159	362	1.1452	8	0.9824	8	0.78677	6	0.859476	6
P49257	1	Protein ERGIC-53	LMAN1	1.6	57.548	510	1.1446	1	0.98933	1	0.93388	2	1.1358	2
A5YKK6-2;A5YKK6;A5YKK6-3;A5YKK6-4;H3BMZ2;B5MDN3	10;10;9;5;4;1	CCR4-NOT transcription complex subunit 1	CNOT1	5.3	266.38	2371	1.1436	10	1.144	10	1.2317	9	0.866701	9
Q9NVD7-2;E9PS97;Q9NVD7;J3KNQ4	1;1;1;1	Alpha-parvin	PARVA	7.7	20.624	182	1.1429	1	1.0669	1	0.76574	2	0.85918	2
Q9Y4B6-2;Q9Y4B6;Q9Y4B6-3	4;4;3	Protein VPRBP	VPRBP	2.6	168.93	1506	1.1415	4	0.99874	4	0.96052	1	0.837731	1
P98175-4;P98175-3;P98175-2;P98175;A0A0A0MR66	1;1;1;1;1	RNA-binding protein 10	RBM10	1.8	94.369	852	1.1408	2	1.2553	2	1.5313	2	1.42978	2
P12429;D6RA82;D6RCA8;D6RFG5;D6RAZ8;D6RFJ9	6;5;3;3;2;1	Annexin A3;Annexin	ANXA3	24.1	36.375	323	1.1405	4	1.1857	4	0.8089	4	0.909422	4
O00411	3	DNA-directed RNA polymerase, mitochondrial	POLRMT	3.5	138.62	1230	1.1396	3	1.2108	3	1.2388	2	1.0688	2
P78347-2;P78347-4;P78347-3;P78347	2;2;2;2	General transcription factor II-I	GTF2I	4.3	107.97	957	1.1353	1	1.3858	1	1.1379	2	1.12983	2
P05198;H0YJS4;G3V4T5	11;10;10	Eukaryotic translation initiation factor 2 subunit 1	EIF2S1	40.3	36.112	315	1.1352	12	0.954	12	1.0248	11	0.966744	11
Q9BW27-2;J3QL54;Q9BW27-3;J3KT10;Q9BW27;J3KTC7;J3QLV0;J3QLD4;J3QLH0	2;2;2;2;2;1;1;1;1	Nuclear pore complex protein Nup85	NUP85	7.8	52.598	462	1.1339	2	1.1208	2	NaN	0	NaN	0
Q9UMX0-2;Q9UMX0;H0YDS0;Q9UMX0-4;Q9UMX0-3;Q9NRR5	2;2;1;1;1;1	Ubiquilin-1;Ubiquilin-4	UBQLN1;UBQLN4	5.2	59.219	561	1.1335	2	1.1171	2	0.85549	1	0.758495	1
F8VZY9;P05783;CON__H-INV:HIT000015463;CON__Q92764;C4AM86;Q92764;CON__Q497I4	27;27;2;2;2;2;2	Keratin, type I cytoskeletal 18	KRT18	69.3	43.774	391	1.1335	62	1.0786	62	0.9635	55	0.984349	55
Q9GZS3;H0YN81;H0YMF9;H0YL19;H0YM76;H3BQA8	7;6;5;5;2;2	WD repeat-containing protein 61	WDR61	39.3	33.58	305	1.1332	8	0.95498	8	1.3144	7	0.944733	7
P62913;P62913-2;Q5VVC8;Q5VVC9	8;7;6;4	60S ribosomal protein L11	RPL11	37.1	20.252	178	1.1327	14	1.0467	14	1.0433	14	1.04261	14
Q15717;Q15717-2;M0QZR9;B1AM48;Q12926-2;Q12926;P26378-4;P26378-2;P26378-5;B1APY9;P26378;P26378-3;B1APY8;A0A0A0MRX1;A0A0R4J2E6	7;7;3;1;1;1;1;1;1;1;1;1;1;1;1	ELAV-like protein 1	ELAVL1	24.5	36.091	326	1.1326	5	1.0971	5	1.1515	6	0.936154	6
A0AVT1;A0AVT1-2;H0Y8S8;A0AVT1-4;A0AVT1-3	4;3;2;1;1	Ubiquitin-like modifier-activating enzyme 6	UBA6	5.3	117.97	1052	1.1324	2	0.96429	2	0.61561	3	0.924898	3
P61026	3	Ras-related protein Rab-10	RAB10	17	22.541	200	1.1318	4	0.93147	4	0.61203	2	0.662208	2
Q7Z2W9-2;Q7Z2W9;F5H7V8;H3BUY0	3;3;2;2	39S ribosomal protein L21, mitochondrial	MRPL21	28.3	13.746	120	1.1306	4	0.89551	4	1.4181	3	1.18053	3
O60506-2;O60506	27;27	Heterogeneous nuclear ribonucleoprotein Q	SYNCRIP	46.6	65.681	588	1.1305	46	1.1779	46	1.1807	49	1.22248	49
P32119;A6NIW5;P32119-2	12;7;2	Peroxiredoxin-2	PRDX2	70.2	21.892	198	1.1302	18	0.99587	18	0.86151	19	0.870246	19
Q9Y281-3;Q9Y281;F8WDN3	5;5;1	Cofilin-2	CFL2	37.6	16.916	149	1.1298	2	1.0207	2	0.81291	2	0.832501	2
Q96B26	3	Exosome complex component RRP43	EXOSC8	17	30.039	276	1.1294	3	0.91191	3	1.3543	2	1.00391	2
Q02790;H0YFG2	3;1	Peptidyl-prolyl cis-trans isomerase FKBP4;Peptidyl-prolyl cis-trans isomerase FKBP4, N-terminally processed	FKBP4	7.8	51.804	459	1.1291	3	1.2947	3	0.78829	3	0.917431	3
Q9UKD2	5	mRNA turnover protein 4 homolog	MRTO4	25.1	27.56	239	1.129	5	0.93055	5	1.2418	4	0.83654	4
Q9BVC6	3	Transmembrane protein 109	TMEM109	13.6	26.21	243	1.1286	4	1.0704	4	1.0537	4	1.01853	4
Q9BRP8-2;Q9BRP8	2;2	Partner of Y14 and mago	WIBG	17.2	22.704	203	1.1286	2	0.93489	2	1.7154	1	0.961446	1
P61163;R4GMT0	6;5	Alpha-centractin	ACTR1A	29.5	42.613	376	1.1282	7	1.0442	7	1.2591	7	1.20939	7
O14646-2;O14646;O14647-2;O14647	5;5;2;2	Chromodomain-helicase-DNA-binding protein 1	CHD1	3.6	196.59	1709	1.1274	7	0.92995	7	0.89754	1	0.720617	1
Q9UHX1-4;A0A0J9YYL3;Q9UHX1-6;Q9UHX1-3;A0A0J9YXJ8;Q9UHX1-5;A0A0J9YVP6;Q9UHX1-2;A0A0J9YXX5;Q9UHX1;A0A0J9YVR6;E9PQ56;A0A0J9YWM1;H0YEM1;E9PN18;E9PL19;E9PMU7;H0YCP8	5;5;5;5;5;5;5;5;5;5;4;4;4;4;3;2;2;1	Poly(U)-binding-splicing factor PUF60	PUF60	13.4	54.024	499	1.1274	5	0.90426	5	0.85309	7	0.690226	7
P26641;P26641-2	21;20	Elongation factor 1-gamma	EEF1G	54.9	50.118	437	1.1273	33	1.0597	33	1.1064	38	1.00418	38
Q9Y265;Q9Y265-2;E7ETR0;H7C4G5;J3QLR1;H7C4I3	10;8;6;4;2;1	RuvB-like 1	RUVBL1	29.2	50.227	456	1.1269	9	1.0317	9	1.2133	9	1.09149	9
P05787;CON__P05787;P05787-2;F8VUG2;F8W1U3;CON__H-INV:HIT000292931;F8VP67;CON__Q9H552;F8VRG4;CON__H-INV:HIT000016045;CON__Q9DCV7;P08729;CON__Q3KNV1;CON__P08729;Q9NSB2;CON__Q9NSB2;CON__Q6ISB0;H0YIB2;CON__REFSEQ:XP_092267;Q8IWY7;H0YHD9;U3KPR1;F8VQY3;F8VS61;CON__Q61726;A0A087X106;O43790;CON__O43790;P78385;CON__Q6NT21;CON__P78385;Q14533;CON__Q14533;P78386;CON__P78386	31;31;31;20;17;16;13;13;9;5;4;4;4;4;3;3;3;2;2;2;1;1;1;1;1;1;1;1;1;1;1;1;1;1;1	Keratin, type II cytoskeletal 8	KRT8	54.7	53.704	483	1.1255	65	1.0661	65	0.97916	56	1.01043	56
C9J2Q4;B5MCX3;Q15019;Q15019-3;Q15019-2;C9IY94;C9IZU3;C9JQJ4;C9J938;H7C310;C9JB25;A0A0K0K1E7;C9JFT1;F8WB65;B5MD47;C9JZI2;H7C2Y0	3;3;3;3;3;2;2;2;2;2;2;1;1;1;1;1;1	Septin-2	2016-09-02	20.1	21.087	184	1.1243	3	1.1841	3	1.3334	3	0.877655	3
Q7KZF4;H7C597	42;9	Staphylococcal nuclease domain-containing protein 1	SND1	55.9	102	910	1.1243	53	1.1097	53	1.3737	53	0.969368	53
O15144;H7C3F9;G5E9S7;C9JTV5;G5E9J0	4;3;1;1;1	Actin-related protein 2/3 complex subunit 2	ARPC2	17.7	34.333	300	1.124	3	1.0136	3	0.85528	4	0.965251	4
Q9H1A7;Q9GZM3;A0A0B4J2F8;P52435;F8WF84;F6S314;E2QRJ6;A6NFM0;D6RAG0;E7EP90;Q9GZM3-2;A0A0B4J1Z8;E7EWC6	2;2;2;2;2;2;2;2;1;1;1;1;1	DNA-directed RNA polymerase II subunit RPB11-b2;DNA-directed RNA polymerase II subunit RPB11-b1;DNA-directed RNA polymerase II subunit RPB11-a	POLR2J3;POLR2J2;POLR2J	23.5	13.092	115	1.1239	2	0.85003	2	1.0217	3	1.16843	3
Q96FJ2;P63167	3;2	Dynein light chain 2, cytoplasmic;Dynein light chain 1, cytoplasmic	DYNLL2;DYNLL1	32.6	10.35	89	1.1233	4	0.99581	4	1.6383	4	1.14603	4
Q9Y230;Q9Y230-2;M0R0Y3;X6R2L4;M0QXI6;M0R0Z0	11;10;6;3;2;1	RuvB-like 2	RUVBL2	28.1	51.156	463	1.1231	7	1.0025	7	1.0789	7	0.99108	7
Q13347;Q5TFK1	13;4	Eukaryotic translation initiation factor 3 subunit I	EIF3I	53.2	36.501	325	1.1227	14	1.0299	14	1.5416	15	1.05964	15
Q13501-2;Q13501;E9PFW8;E7EMC7;C9JRJ8;E3W990	5;5;4;4;3;2	Sequestosome-1	SQSTM1	18.8	38.629	356	1.1219	6	1.12	6	1.8961	6	1.25122	6
O75534-2;O75534;O75534-3;O75534-4;E9PLT0;E9PNG3;E9PKN4;E9PLD4	15;15;15;15;14;2;1;1	Cold shock domain-containing protein E1	CSDE1	21.1	85.746	767	1.1218	15	1.2788	15	1.2	14	1.10958	14
P62753;A2A3R7;A2A3R5	6;4;3	40S ribosomal protein S6	RPS6	23.3	28.68	249	1.1203	8	0.98469	8	0.79622	10	0.772618	10
Q9BUQ8;H0YI52;F8VVA2	8;3;1	Probable ATP-dependent RNA helicase DDX23	DDX23	11.8	95.581	820	1.1202	7	1.1299	7	1.2401	5	1.25025	5
O15372;B3KS98;A0A087WZK9;E5RJT0;E5RGU4;E5RFW7;E5RFH0;E5RHC7;E5RH59	11;11;10;6;3;2;2;1;1	Eukaryotic translation initiation factor 3 subunit H	EIF3H;EIF3S3	39.5	39.93	352	1.1192	10	1.0183	10	1.5282	14	1.04755	14
P12081-4;P12081;P12081-3;P12081-2;B4DDD8;B3KWE1;E7ETE2;B4E1C5;D6RF05	10;10;9;9;8;8;7;7;2	Histidine--tRNA ligase, cytoplasmic	HARS	20	54.846	489	1.1192	6	0.90571	6	0.83073	4	1.04043	4
B7WP74;Q9HCG8	8;8	Pre-mRNA-splicing factor CWC22 homolog	CWC22	12.6	85.576	745	1.1178	7	0.74707	7	1.1744	4	0.706115	4
Q08J23;Q08J23-2;Q08J23-3	18;16;11	tRNA (cytosine(34)-C(5))-methyltransferase	NSUN2	30.8	86.47	767	1.1154	21	0.92388	21	1.3122	14	0.663174	14
P09234;A0A0A0MRR7;Q5TAL2	3;3;1	U1 small nuclear ribonucleoprotein C	SNRPC	24.5	17.394	159	1.1146	3	0.90028	3	1.301	4	1.14358	4
O15145;F8VR50;C9JZD1	3;1;1	Actin-related protein 2/3 complex subunit 3	ARPC3	17.4	20.546	178	1.1144	3	1.0781	3	0.68541	3	0.742721	3
O43852-5;O43852;O43852-3;O43852-9;O43852-2;O43852-4;H0Y875;O43852-15;O43852-6;O43852-13;O43852-14;O43852-11;O43852-10;O43852-8;O43852-12;O43852-7	7;7;7;5;5;5;4;4;4;3;3;3;3;2;1;1	Calumenin	CALU	42.8	26.891	229	1.1133	8	1.1876	8	0.83181	7	0.931359	7
Q9BYN0	6	Sulfiredoxin-1	SRXN1	57.7	14.259	137	1.1113	6	1.0715	6	0.7033	6	0.745712	6
P26368-2;P26368;K7ENG2	8;8;7	Splicing factor U2AF 65 kDa subunit	U2AF2	21.9	53.12	471	1.111	9	0.90555	9	0.93737	9	0.8364	9
H0YNX5;H0YNA5;P67812-2;H0YNG3;P67812-4;P67812;P67812-3	2;2;2;2;2;2;2	Signal peptidase complex catalytic subunit SEC11A	SEC11A	16	11.986	106	1.1109	2	1.1815	2	1.4556	3	1.0291	3
P09651-3;F8W6I7;P09651-2;P09651;F8VZ49;Q32P51;F8VTQ5;F8W646;H0YH80;F8VYN5	17;17;17;17;12;11;10;9;7;5	Heterogeneous nuclear ribonucleoprotein A1;Heterogeneous nuclear ribonucleoprotein A1-like 2	HNRNPA1;HNRNPA1L2	60.7	29.386	267	1.1104	31	1.1387	31	1.3506	36	1.02301	36
U3KQS7;Q9Y4Z0;V9GZ56;M0QXB0;U3KQK1	2;2;2;1;1	U6 snRNA-associated Sm-like protein LSm4	LSM4	20.2	12.455	109	1.1104	3	1.0421	3	1.2411	3	1.04679	3
P68133;P68032;P63267;P62736;A6NL76;C9JUM1;F8WB63;B8ZZJ2;C9JFL5;F6UVQ4;F6QUT6;P63267-2;F8WCH0	13;13;12;12;11;8;8;8;8;8;8;7;3	Actin, alpha skeletal muscle;Actin, alpha cardiac muscle 1;Actin, gamma-enteric smooth muscle;Actin, aortic smooth muscle	ACTA1;ACTC1;ACTG2;ACTA2;ACTB	31.8	42.051	377	1.1101	4	1.0028	4	0.86008	5	0.997805	5
P30048-2;P30048	6;6	Thioredoxin-dependent peroxide reductase, mitochondrial	PRDX3	26.1	25.838	238	1.1095	11	0.96839	10	1.0767	10	0.901469	10
Q6PKG0-3;Q6PKG0;Q659C4-7;Q659C4-6;Q659C4-5;E5RH50;A0A0B4J210;Q659C4-2;Q659C4;Q659C4-9;H0YC33;H0YC73;H0YBW1	7;7;3;3;3;3;3;3;3;2;1;1;1	La-related protein 1	LARP1	8	116.46	1019	1.1091	14	0.90424	14	0.86128	13	0.907194	13
Q9Y294;K7ES22;Q9NVP2	2;1;1	Histone chaperone ASF1A;Histone chaperone ASF1B	ASF1A;ASF1B	11.3	22.968	204	1.1084	2	0.9947	2	0.98679	3	0.978665	3
Q15404-2;Q15404	3;3	Ras suppressor protein 1	RSU1	25.4	25.545	224	1.1083	4	0.92051	4	0.91444	3	0.933184	3
K7ELZ9;A0A0C4DGP7;K7EMW4;Q969V3-2;Q969V3;K7EQ66;K7ENM2	2;2;2;2;2;1;1	Nicalin	NCLN	12.4	32.457	282	1.108	1	1.1973	1	0.96172	2	1.07301	2
Q7L2H7;J3KNJ2;Q7L2H7-2;H0YCQ8;E9PN86;E9PRY0;E9PRI2;E7ESM3	12;8;8;7;4;2;1;1	Eukaryotic translation initiation factor 3 subunit M	EIF3M	46.8	42.502	374	1.108	13	0.99719	13	1.5976	16	1.09849	16
E9PK01;P29692;P29692-3;A0A087X1X7;P29692-2;E9PRY8;E9PPR1;E9PL12;E9PQ49;E9PI39;E9PMW7;E9PL71;E9PQZ1;P29692-4;E9PN91;E9PIZ1;H0YCK7;E9PQC9;H0YE58;E9PK06;H0YE72;E9PNW6;E9PKK3;E9PK72;E9PJD0	7;7;6;6;6;6;5;5;5;5;4;4;4;4;3;3;3;2;2;2;2;1;1;1;1	Elongation factor 1-delta	EEF1D	35.2	28.821	261	1.107	8	1.1084	8	1.4362	8	1.11024	8
P52597;H0YBG7;H0YBD7	4;2;2	Heterogeneous nuclear ribonucleoprotein F;Heterogeneous nuclear ribonucleoprotein F, N-terminally processed	HNRNPF;HNRNPH1	14.5	45.671	415	1.1067	5	1.0981	5	0.97322	3	0.782963	3
A0A024QZ42;O75340-2;O75340	2;2;2	Programmed cell death protein 6	PDCD6	19	14.45	121	1.1066	2	0.96827	2	NaN	0	NaN	0
I3L3E9;P39748-2;P39748	1;1;1	Flap endonuclease 1	FEN1	13	17.799	154	1.1065	2	0.94155	2	0.62787	2	0.888336	2
P26038;V9GZ54	11;3	Moesin	MSN	18.9	67.819	577	1.1055	5	1.0851	5	0.78221	4	0.862738	4
F8W1R7;P60660-2;P60660;G3V1V0;J3KND3;G8JLA2;B7Z6Z4;G3V1Y7;F8VPF3;F8VZU9;F8W180;H0YI43;F8W1I5;P14649;F8VXL3	8;8;8;8;7;7;7;6;6;4;4;2;2;2;1	Myosin light polypeptide 6	MYL6	57.9	16.29	145	1.1052	8	1.037	8	1.1118	9	1.06054	9
P22087;M0R0P1;M0R299;M0QXL5;M0R2Q4;M0R2U2;M0R1H0;M0R2B0	7;6;6;6;6;3;3;3	rRNA 2-O-methyltransferase fibrillarin	FBL	25.5	33.784	321	1.1048	6	0.89368	6	1.1124	7	1.17445	7
Q93008-1;Q93008;O00507;O00507-2;H7C2M9	45;45;20;18;1	Probable ubiquitin carboxyl-terminal hydrolase FAF-X	USP9X	22	290.46	2554	1.1046	47	0.94014	47	1.069	44	0.845594	44
E7EWC2;F5H7S7;Q13576;Q13576-3;Q13576-2;E9PDT6;D6R939	6;6;6;5;5;2;2	Ras GTPase-activating-like protein IQGAP2	IQGAP2	7.8	160.33	1402	1.1035	4	1.2101	4	0.98729	5	0.99691	5
O75533;H7C341	22;5	Splicing factor 3B subunit 1	SF3B1	24	145.83	1304	1.1033	20	0.95162	20	0.99235	18	0.911328	18
Q9NXH9-2;Q9NXH9;K7EQQ8;K7EQU7	5;5;3;1	tRNA (guanine(26)-N(2))-dimethyltransferase	TRMT1	10.3	69.305	630	1.1032	4	1.1511	4	1.2736	3	0.943218	3
P26639;P26639-2;D6RCA5;D6R9F8;D6RDJ6;D6RBR8;A2RTX5-2;B7ZLP8;A2RTX5	18;18;2;2;2;1;1;1;1	Threonine--tRNA ligase, cytoplasmic	TARS	30.6	83.434	723	1.1027	18	1.1203	18	0.84511	16	0.956206	16
P51571;A6NLM8	5;3	Translocon-associated protein subunit delta	SSR4	36.4	18.998	173	1.1026	6	1.1253	6	1.4598	6	1.1377	6
E9PGT1;Q15631;Q15631-2;H7C1D4;A0A0J9YVW2	3;3;2;2;1	Translin	TSN	20.6	25.572	223	1.1023	3	1.033	3	0.93354	3	0.862515	3
H0YMZ1;H0YL69;P25789;H0YMA1;H0YN18;H0YLC2;H0YKT8;H0YMI6;P25789-2;H0YKS0;H0YMV3;H0YLS6	7;7;7;6;6;5;5;5;5;4;3;2	Proteasome subunit alpha type;Proteasome subunit alpha type-4;Proteasome subunit beta type	PSMA4	36.4	24.526	220	1.1021	5	1.1602	5	1.2085	6	1.00195	6
Q9UMS4;F5GY56;F5H2I0;H0YGF3	9;5;2;1	Pre-mRNA-processing factor 19	PRPF19	27.4	55.18	504	1.1019	10	0.98877	10	1.2768	9	1.03243	9
P53999;D6RC37;D6R970	6;1;1	Activated RNA polymerase II transcriptional coactivator p15	SUB1	44.9	14.395	127	1.1011	8	0.96385	8	1.3579	9	1.05598	9
P00167-2;P00167;P00167-3;J3KNC7	5;5;4;1	Cytochrome b5	CYB5A	67.3	11.268	98	1.0996	4	1.0957	4	0.94636	4	0.854774	4
Q15056-2;Q15056	2;2	Eukaryotic translation initiation factor 4H	EIF4H	11.8	25.2	228	1.0993	2	0.98853	2	0.51112	3	0.968898	3
P61923;F8VVA7;F8VXB1;F8W156;P61923-5;F8VYZ4;P61923-4;F8VUC5;F8W651;F8VXR1;P61923-3;F8VYK5;P61923-2;F8VYE0	5;5;4;4;4;4;4;3;3;3;2;1;1;1	Coatomer subunit zeta-1	COPZ1	39.5	20.198	177	1.0991	5	0.85344	5	1.1049	9	1.05662	9
Q9BTV4	2	Transmembrane protein 43	TMEM43	5.8	44.875	400	1.0981	2	0.92685	2	0.86344	1	1.00891	1
Q9NY12-2;Q9NY12	2;2	H/ACA ribonucleoprotein complex subunit 1	GAR1	13.6	20.834	199	1.0981	3	0.90113	3	1.0407	1	1.07306	1
Q9BQ52-4;Q9BQ52;G5E9D5;E7ES68;Q9BQ52-3;Q9BQ52-2;V9GZ72;V9GYS7;H7C2I4;J3QRS2;V9GYU5;J3QL08;J3QLK4	14;14;12;10;8;6;3;3;3;2;2;2;2	Zinc phosphodiesterase ELAC protein 2	ELAC2	23.5	87.563	786	1.0967	12	1.0458	12	1.1158	11	1.02478	11
P27348;E9PG15	9;5	14-3-3 protein theta	YWHAQ	42.4	27.764	245	1.0965	9	0.96256	9	0.83353	8	0.814531	8
P28066;P28066-2	7;5	Proteasome subunit alpha type-5	PSMA5	29.9	26.411	241	1.0957	7	1.088	7	1.2727	7	1.08846	7
Q8IV48;E5RIV7	2;1	3-5 exoribonuclease 1	ERI1	6.9	40.063	349	1.0956	2	0.94959	2	0.92421	2	1.14732	2
Q9UK22;R4GNH2	8;2	F-box only protein 2	FBXO2	38.5	33.327	296	1.0949	6	0.97433	6	0.94512	7	0.891424	7
P22626;P22626-2;A0A087WUI2	18;17;15	Heterogeneous nuclear ribonucleoproteins A2/B1	HNRNPA2B1	49	37.429	353	1.094	32	1.1063	32	1.2619	42	1.09426	42
Q9H0S4-2;Q9H0S4;F5H1N9	3;3;1	Probable ATP-dependent RNA helicase DDX47	DDX47	12.3	45.169	406	1.0939	2	1.0214	2	1.1019	3	1.12947	3
P17612-2;P17612;Q15136;K7ERP6;P22694-10;P22694-4;A0A087WVC4;P22694-3;P22694;P22694-5;P22694-7;P22694-6;A0A0A0MS54;P22694-9;P22694-2	2;2;1;1;1;1;1;1;1;1;1;1;1;1;1	cAMP-dependent protein kinase catalytic subunit alpha;cAMP-dependent protein kinase catalytic subunit beta	PRKACA;KIN27;PRKACB	6.1	39.821	343	1.0938	2	1.1639	2	0.99481	3	0.943307	3
Q15393;Q15393-3;Q15393-2;J3QL37;I3L4G7;J3QRB2;H3BMB0	27;12;9;3;3;2;1	Splicing factor 3B subunit 3	SF3B3	26.8	135.58	1217	1.0938	22	0.94837	22	0.89548	20	0.936856	20
Q13045-2;Q13045-3;Q13045	7;7;7	Protein flightless-1 homolog	FLII	5.9	138.49	1214	1.0936	7	1.0248	7	1.0503	6	1.04144	6
P19105;O14950;J3QRS3;J3KTJ1;P24844;P24844-2	4;4;4;2;2;1	Myosin regulatory light chain 12A;Myosin regulatory light chain 12B;Myosin regulatory light polypeptide 9	MYL12A;MYL12B;MYL9	29.2	19.794	171	1.0933	4	1.2216	4	1.008	3	1.20098	3
Q3L8U1-2;Q3L8U1-3;Q3L8U1;Q9P2D1;H0YJG4;H3BTW3;Q9HCK8-2;Q9HCK8;Q8TD26;C9JFU2;H7C294;Q8TD26-3;A0A087WU44	4;4;4;4;3;3;3;3;2;1;1;1;1	Chromodomain-helicase-DNA-binding protein 9;Chromodomain-helicase-DNA-binding protein 7;Chromodomain-helicase-DNA-binding protein 8;Chromodomain-helicase-DNA-binding protein 6	CHD9;CHD7;CHD8;CHD6	1.1	324.05	2881	1.0931	3	1.0245	3	2.6445	3	0.966931	3
O75821;K7ER90;K7EL20;K7EP16;K7ENA8;K7ENH0;K7EL60	8;6;6;5;5;1;1	Eukaryotic translation initiation factor 3 subunit G	EIF3G	29.4	35.611	320	1.0928	11	1.0516	11	1.3994	13	1.15772	13
Q9BYC8	2	39S ribosomal protein L32, mitochondrial	MRPL32	18.6	21.405	188	1.0921	2	0.88245	2	1.2629	2	1.41028	2
Q8N1G4	4	Leucine-rich repeat-containing protein 47	LRRC47	10.3	63.472	583	1.0921	4	0.88043	4	1.1868	1	0.844381	1
Q9NR30-2;Q9NR30;A0A087WVC1;Q9BQ39	21;21;2;2	Nucleolar RNA helicase 2	DDX21	38.7	79.656	715	1.0918	23	1.287	23	1.0377	16	1.51513	16
Q7L1Q6-2;Q7L1Q6;Q7L1Q6-4;Q7L1Q6-3;C9JV57;C9J188;C9JWF5;C9JFN4;C9IZ80	2;2;2;2;1;1;1;1;1	Basic leucine zipper and W2 domain-containing protein 1	BZW1	10.5	40.538	353	1.0918	2	0.98183	2	0.72548	1	0.798085	1
Q92499;F1T0B3;A0A087X2G1;Q92499-3;Q92499-2	14;12;12;11;10	ATP-dependent RNA helicase DDX1	DDX1	25	82.431	740	1.0913	15	1.0596	15	0.90077	16	0.857045	16
P42285;H0YAC4;D6REC7	5;1;1	Superkiller viralicidic activity 2-like 2	SKIV2L2	8.3	117.8	1042	1.0896	4	0.99728	4	1.1277	4	0.909008	4
Q9UBQ5-2;Q9UBQ5;K7ERF1;K7ES31;K7EQM4;A0A087WVB9;B4DQ48;K7EK53	7;7;5;4;4;4;3;3	Eukaryotic translation initiation factor 3 subunit K	EIF3K	53.6	24.484	211	1.0895	13	1.0732	13	1.8113	10	1.22029	10
Q09028-3;Q09028;Q09028-2;Q09028-4;E9PNS2;E9PIC4;E9PNS6;C9JPP3	6;6;5;4;2;2;2;1	Histone-binding protein RBBP4	RBBP4	15.1	46.158	410	1.0893	3	1.0004	3	1.195	4	1.13051	4
C9K0R9;P20839-3;P20839-7;P20839-5;P20839-6;F8WDE9;C9J029;P20839-2;P20839-4;C9J381;P20839	2;2;2;2;2;1;1;1;1;1;1	Inosine-5-monophosphate dehydrogenase 1;Inosine-5-monophosphate dehydrogenase	IMPDH1	12.8	31.206	289	1.0891	1	1.1983	1	5.6537	2	1.8356	2
P62312	5	U6 snRNA-associated Sm-like protein LSm6	LSM6	43.8	9.1275	80	1.0887	4	0.93628	4	1.206	3	1.06273	3
P24666;G5E9R5;P24666-4;P24666-3;P24666-2;F2Z2Q9;D3YTI2	6;4;4;4;4;3;2	Low molecular weight phosphotyrosine protein phosphatase	ACP1	54.4	18.042	158	1.0883	6	0.9462	6	1.0414	6	0.939232	6
F5H2T0;O95163;H0YDF3	5;5;1	Elongator complex protein 1	IKBKAP	6.1	111.47	983	1.0883	5	0.89428	5	0.98809	4	1.04363	4
H0YNE9;Q92930	2;2	Ras-related protein Rab-8B	RAB8B	13.3	21.868	188	1.0879	2	1.1733	2	0.90972	2	0.92885	2
Q9UDW1;Q9UDW1-2;Q9NZY4	2;1;1	Cytochrome b-c1 complex subunit 9	UQCR10	38.1	7.3084	63	1.0877	2	1.0137	2	1.4349	2	1.218	2
Q02809;Q02809-2	1;1	Procollagen-lysine,2-oxoglutarate 5-dioxygenase 1	PLOD1	2.1	83.549	727	1.0876	2	1.1347	2	0.91594	2	0.865052	2
O14818;O14818-2;O14818-4;H0Y586;Q8TAA3-2;Q8TAA3-5;Q8TAA3;A0A087WYS6;F5GY34	8;5;4;4;4;4;4;3;1	Proteasome subunit alpha type-7;Proteasome subunit alpha type-7-like	PSMA7;PSMA8	40.7	27.887	248	1.0873	7	1.094	7	1.2151	8	1.12188	8
P13674-3;P13674-2;P13674	10;10;10	Prolyl 4-hydroxylase subunit alpha-1	P4HA1	25.4	58.957	516	1.0868	10	0.88421	10	1.2709	12	1.27416	12
Q8N5G0-2;Q8N5G0;E5RH91	2;2;1	Small integral membrane protein 20	SMIM20	32.8	7.7019	67	1.0863	2	0.98537	2	1.0256	2	1.00383	2
E7EQ69;Q9GZZ1;C9J5D1;Q9GZZ1-2;A0A087WWJ2;B0AZT5;C9JZU6;C9J5J3;A0A0D9SF32	4;4;3;2;2;2;1;1;1	N-alpha-acetyltransferase 50	NAA50	26.8	19.311	168	1.0863	3	0.85531	3	0.95988	2	1.111	2
P51659;E7EWE5;P51659-3;P51659-2;E7ER27;G5E9S2;E7ET17;E7EPL9	12;10;10;10;9;7;7;6	Peroxisomal multifunctional enzyme type 2;(3R)-hydroxyacyl-CoA dehydrogenase;Enoyl-CoA hydratase 2	HSD17B4	21.1	79.685	736	1.0857	14	0.98112	14	0.94403	15	0.878194	15
Q14315;Q14315-2	103;102	Filamin-C	FLNC	50.9	291.02	2725	1.0852	101	1.1376	101	0.96652	106	0.895015	106
Q9UQ80;Q9UQ80-2;F8VR77;H0YIN7;F8W0A3;F8VZ69	17;14;10;6;6;2	Proliferation-associated protein 2G4	PA2G4	59.1	43.786	394	1.0849	24	1.0235	24	1.2111	18	0.964785	18
Q15437;Q5QPE2;Q5QPE1	14;7;5	Protein transport protein Sec23B	SEC23B	23.9	86.478	767	1.0844	9	1.0787	9	1.0256	9	1.0501	9
Q96AG4;I3L223	7;1	Leucine-rich repeat-containing protein 59	LRRC59	26.4	34.93	307	1.084	4	1.0937	4	0.93575	6	0.986972	6
Q16401;Q16401-2;F2Z3J2;Q4VXH0	6;5;1;1	26S proteasome non-ATPase regulatory subunit 5	PSMD5	13.7	56.195	504	1.084	4	1.0847	4	1.1513	3	1.07309	3
C9JTY3;C9JUE0;C9JJP5;Q92734-4;Q92734-3;Q05BK6;Q92734-2;Q92734	2;2;2;2;2;2;2;2	Protein TFG	TFG	14.1	14.759	128	1.0838	2	1.0029	2	1.3205	4	1.11717	4
Q12797-10;Q12797;E5RHJ2;E5RHK2;G3XAN5;E5RG29;Q12797-7;Q12797-4;Q12797-3;Q12797-9;Q12797-6;A0A0A0MSK8;Q12797-5;Q12797-8;Q12797-2;E5RG56	8;8;1;1;1;1;1;1;1;1;1;1;1;1;1;1	Aspartyl/asparaginyl beta-hydroxylase	ASPH	15.9	83.267	729	1.0837	7	0.89847	7	1.0083	6	0.940203	6
K7ENW7;P26358-3;P26358;P26358-2	1;1;1;1	DNA (cytosine-5)-methyltransferase 1	DNMT1	3.6	43.277	389	1.0834	1	1.2881	1	0.84332	2	1.03262	2
D6RHZ5;O94979-6;O94979-3;O94979-10;O94979-4;O94979-9;O94979-2;O94979;O94979-8;D6REX3;O94979-7;H7BXG7;H0YAB3;H0Y9K1;O94979-5;H0Y8V7;H0Y9T9	8;8;8;8;8;8;8;8;8;8;7;7;6;5;5;4;1	Protein transport protein Sec31A	SEC31A	9.4	96.502	877	1.083	6	1.0025	6	0.90894	7	0.968804	7
Q99880;Q99879;Q99877;Q93079;Q5QNW6;P62807;P58876;P57053;O60814;B2R4S9;Q5QNW6-2;U3KQK0	4;4;4;4;4;4;4;4;4;4;4;4	Histone H2B type 1-L;Histone H2B type 1-M;Histone H2B type 1-N;Histone H2B type 1-H;Histone H2B type 2-F;Histone H2B type 1-C/E/F/G/I;Histone H2B type 1-D;Histone H2B type F-S;Histone H2B type 1-K;Histone H2B	HIST1H2BL;HIST1H2BM;HIST1H2BN;HIST1H2BH;HIST2H2BF;HIST1H2BC;HIST1H2BD;H2BFS;HIST1H2BK;HIST1H2BI	35.7	13.952	126	1.0829	7	0.97004	7	1.2604	9	1.25419	9
P46940;H0YLE8;A0A0J9YXZ5;H0YKA5;A0A087WWP1;F2Z2E2;Q86VI3	26;19;14;1;1;1;1	Ras GTPase-activating-like protein IQGAP1	IQGAP1	21.5	189.25	1657	1.0819	33	1.0288	33	0.86143	24	0.891027	24
P20042	5	Eukaryotic translation initiation factor 2 subunit 2	EIF2S2	18.6	38.388	333	1.0787	10	1.0287	10	1.0587	7	0.923873	7
Q00796;Q00796-2;H0YKB3;H0YLA4	3;2;2;1	Sorbitol dehydrogenase	SORD	12.9	38.324	357	1.0785	3	0.99495	3	0.86541	2	0.995124	2
O95881	2	Thioredoxin domain-containing protein 12	TXNDC12	12.8	19.206	172	1.0785	1	0.93408	1	1.0454	2	0.951203	2
O94906;O94906-2	5;4	Pre-mRNA-processing factor 6	PRPF6	5.3	106.92	941	1.0784	4	0.87695	4	1.4449	3	0.778756	3
Q9Y3I0	4	tRNA-splicing ligase RtcB homolog	C22orf28	10.1	55.21	505	1.0782	3	1.0937	3	1.1212	3	0.913993	3
Q07955;J3KTL2;Q07955-3;Q07955-2;J3QQV5;J3KSW7;J3KSR8;S4R3G0;Q13242	12;12;11;11;4;4;4;1;1	Serine/arginine-rich splicing factor 1	SRSF1	43.5	27.744	248	1.0782	20	1.0837	20	1.684	14	1.55092	14
P46821;D6RA32;D6RA40;D6RGJ3;D6RCL2	15;7;4;3;2	Microtubule-associated protein 1B;MAP1B heavy chain;MAP1 light chain LC1	MAP1B	8.6	270.63	2468	1.078	13	0.93798	13	1.3702	12	1.04056	12
C9JAW5;Q9Y241;C9JNU6;Q9Y241-2	2;2;2;1	HIG1 domain family member 1A, mitochondrial	HIGD1A	48.2	8.8131	83	1.0772	3	0.92327	3	1.3282	3	1.09363	3
P49721;A0A087WVV1	5;4	Proteasome subunit beta type-2	PSMB2	24.4	22.836	201	1.0771	6	1.0033	6	1.3558	7	1.08121	7
P36776-3;K7EJE8;K7EKE6;P36776-2;P36776;K7ER27	4;4;4;4;4;2	Lon protease homolog, mitochondrial	LONP1	5.9	85.64	763	1.0768	2	0.95708	2	0.69422	3	0.911328	3
M0QZQ3;Q9H254-4;Q9H254;C9JY79;Q9H254-2;E9PJZ2;Q9H254-5;Q9H254-3	3;3;3;3;2;1;1;1	Spectrin beta chain, non-erythrocytic 4	SPTBN4	1.6	225.49	2002	1.0763	1	1.3749	1	0.90011	2	0.902853	2
P62195-2;P62195;J3QQM1;J3QLH6;J3KRP2;J3QSA9;J3QRR3;J3QRW1;J3QSE0;Q8NB90-3;Q8NB90-2;Q8NB90	9;9;7;6;6;6;4;3;3;1;1;1	26S protease regulatory subunit 8	PSMC5	25.6	44.784	398	1.0759	7	1.0472	7	1.1081	6	1.13929	6
O60885;M0QZD9;O60885-2;O60885-3;Q15059-2;Q15059	3;2;2;2;1;1	Bromodomain-containing protein 4	BRD4	2.4	152.22	1362	1.0746	3	0.90302	3	1.1172	2	0.809192	2
Q00839;Q00839-2;Q5RI18	27;25;8	Heterogeneous nuclear ribonucleoprotein U	HNRNPU	36.1	90.583	825	1.0741	68	1.0803	68	1.6263	57	1.13514	57
P31689-2;P31689	4;4	DnaJ homolog subfamily A member 1	DNAJA1	19.6	37.044	331	1.0737	4	0.97203	4	1.0419	4	0.923276	4
Q99733;Q99733-2;C9J6D1;C9JZI7;A8MXH2;E9PKT8;H0YCI4;E9PNW0;E9PJJ2;E9PS34;E9PNJ7;E9PKI2;C9J1B1;E9PP22	5;5;4;4;3;3;3;2;2;2;2;1;1;1	Nucleosome assembly protein 1-like 4	NAP1L4	17.3	42.823	375	1.0735	3	1.0093	3	1.0288	4	0.975991	4
Q5JPU0;Q5JPT9;Q5JPU1;P08559-3;P08559;P08559-2;P08559-4;Q5JPU2	2;2;2;2;2;2;2;1	Pyruvate dehydrogenase E1 component subunit alpha, somatic form, mitochondrial	PDHA1	12.2	19.845	180	1.0733	2	1.0196	2	NaN	0	NaN	0
F5GXX5;P61803;F5H895;A0A0B4J239	3;3;2;2	Dolichyl-diphosphooligosaccharide--protein glycosyltransferase subunit DAD1	DAD1	37.6	9.5541	85	1.0729	3	1.05	3	1.3077	3	1.10935	3
P17844;J3KTA4;P17844-2;J3KRZ1;J3QRQ7;J3QSF1;J3QR02;J3KRX8;X6RLV5;J3QRN5	21;21;20;9;8;6;4;4;2;1	Probable ATP-dependent RNA helicase DDX5	DDX5	35.2	69.147	614	1.0728	20	1.0619	20	1.0346	19	1.05425	19
Q9H444;P59074	5;1	Charged multivesicular body protein 4b	CHMP4B	25.9	24.95	224	1.0726	4	0.95621	4	0.73425	6	1.13705	6
Q15785	1	Mitochondrial import receptor subunit TOM34	TOMM34	2.9	34.559	309	1.0725	2	1.0132	2	0.841	1	1.00112	1
O60684;Q5TFJ7;O15131	6;4;4	Importin subunit alpha-7;Importin subunit alpha-6	KPNA6;KPNA5	16.2	60.029	536	1.0723	5	0.92763	5	1.1015	5	1.08678	5
P12814-2;P12814;P12814-3;P12814-4;H9KV75;G3V2N5;G3V2W4;H7C5W8;G3V2X9;H0YJ11;H0YJW3	28;28;28;28;25;11;10;10;7;6;5	Alpha-actinin-1	ACTN1	37.3	102.71	887	1.072	9	0.979	9	0.90671	9	0.997606	9
P62158;H0Y7A7;E7ETZ0;E7EMB3;F8WBR5;M0QZ52;G3V479;G3V361;Q96HY3;G3V226;P27482	6;6;5;5;3;3;3;3;3;2;1	Calmodulin	CALM1;CALM2;CALM3	38.3	16.837	149	1.0715	7	1.02	7	1.0109	11	0.903669	11
B1ALA9;P60891-2;P60891;B7ZB02;H7C540;P21108;P11908;A0A0B4J207;P11908-2	3;3;3;1;1;1;1;1;1	Ribose-phosphate pyrophosphokinase 1	PRPS1	18.3	24.084	218	1.0707	3	0.88294	3	1.024	2	0.808996	2
P52895;B4DK69;A0A0A0MSD5;S4R3P0	15;14;13;7	Aldo-keto reductase family 1 member C2	AKR1C2	59.8	36.735	323	1.0705	4	1.0781	4	0.83579	4	0.895496	4
P0DMV9;P0DMV8;A0A0G2JIW1;P0DMV8-2;V9GZ37	16;16;16;14;10			33.5	70.051	641	1.0703	10	1.0549	10	0.92107	9	0.918274	9
Q9Y2X3;H7BZ72	6;2	Nucleolar protein 58	NOP58	14.9	59.578	529	1.0703	4	0.80351	4	1.3497	4	1.22579	4
Q9H3U1-2;Q9H3U1	1;1	Protein unc-45 homolog A	UNC45A	2.2	101.67	929	1.0701	1	1.0565	1	0.7636	2	0.913492	2
P05386	3	60S acidic ribosomal protein P1	RPLP1	42.1	11.514	114	1.0696	4	0.86483	4	1.0452	3	0.802053	3
O60341;O60341-2;R4GMP9;R4GMQ1	5;5;3;1	Lysine-specific histone demethylase 1A	KDM1A	8.9	92.902	852	1.0692	5	1.0885	5	0.92781	5	0.987459	5
H0Y6E7;H3BT71;P38159;H3BR27;P38159-3;P38159-2;H3BNC1;Q96E39;O75526;Q8N7X1	5;5;5;4;4;4;2;2;2;1	RNA-binding motif protein, X chromosome;RNA-binding motif protein, X chromosome, N-terminally processed	RBMX	19.2	31.745	292	1.0688	6	1.0369	6	1.165	8	1.23151	8
O00442;O00442-2;A6NIC1	8;8;1	RNA 3-terminal phosphate cyclase	RTCA	28.4	39.336	366	1.0683	6	0.97828	6	1.1597	7	1.18	7
P30040;F8VY02;P30040-2;F8W1G0	7;5;1;1	Endoplasmic reticulum resident protein 29	ERP29	28.4	28.993	261	1.0677	6	1.004	6	0.82973	6	0.910332	6
P25786;P25786-2;F5GX11;B4DEV8	5;5;4;3	Proteasome subunit alpha type-1;Proteasome subunit alpha type	PSMA1	20.9	29.555	263	1.0677	3	0.92739	3	1.2475	4	1.04571	4
Q9UQ88-10;P21127-12;P21127-4;P21127-5;P21127-10;P21127-6;Q5QPR4;P21127-9;J3QR29;Q9UQ88-4;P21127-8;A0A0D9SEI3;Q9UQ88-3;Q5QPR3;Q9UQ88-2;J3QKR5;P21127-3;P21127-2;B7ZVY7;Q9UQ88;A0A0D9SER5;A0A0D9SEN2;P21127;J3QR44;Q9UQ88-5;Q9UQ88-9;Q9UQ88-8;Q13882	10;10;10;10;10;10;10;10;10;10;10;10;10;10;10;10;10;10;10;10;10;10;10;10;9;7;1;1	Cyclin-dependent kinase 11A;Cyclin-dependent kinase 11B	CDK11A;CDK11B;CDC2L1	22.6	49.623	439	1.0674	7	1.0749	7	1.1424	9	1.22677	9
P20618	7	Proteasome subunit beta type-1	PSMB1	41.9	26.489	241	1.0672	7	1.1778	7	1.3305	6	1.11574	6
Q92973-2;Q92973;Q92973-3;O14787-2;K7ENW1;K7ESC1;E7EW37;S4R398;A0A075B780;O14787	3;3;2;2;1;1;1;1;1;1	Transportin-1;Transportin-2	TNPO1;TNPO2	3.4	101.31	890	1.0672	3	1.1077	3	1.2832	3	0.856164	3
Q8NEZ5-3;Q8NEZ5;H3BTH6;Q8NEZ5-2;H3BRE0;H3BVA4;H3BUC1	3;3;2;1;1;1;1	F-box only protein 22	FBXO22	14.1	30.588	276	1.0663	3	1.0114	3	0.62706	3	1.20137	3
Q99460-2;Q99460;A0A087WW66;C9J9M4;H7C378;F8WCE3;H7BZR6	13;13;12;4;3;2;1	26S proteasome non-ATPase regulatory subunit 1	PSMD1	18.5	102.26	922	1.0662	12	1.1029	12	0.98993	11	1.08475	11
O75489	2	NADH dehydrogenase [ubiquinone] iron-sulfur protein 3, mitochondrial	NDUFS3	9.5	30.241	264	1.0661	2	1.0442	2	1.2055	1	1.47371	1
Q9UET6-2;Q9UET6;B7Z4K4	3;3;1	Putative tRNA (cytidine(32)/guanosine(34)-2-O)-methyltransferase	FTSJ1	14.1	35.867	327	1.0661	3	0.81783	3	1.2801	1	1.19136	1
Q15075	30	Early endosome antigen 1	EEA1	25.6	162.46	1411	1.0654	28	1.082	28	0.96273	11	1.02834	11
P28072;I3L3X7;A0A087X2I4	3;1;1	Proteasome subunit beta type-6	PSMB6	13	25.357	239	1.0654	3	1.0168	3	1.4564	5	1.19372	5
P62805	6	Histone H4	HIST1H4A	50.5	11.367	103	1.0651	5	0.83613	5	1.2103	6	1.41211	6
H0YA96;H0Y8G5;Q14103-4;Q14103-3;Q14103-2;Q14103;D6RAF8;D6RF44;D6RBQ9;D6RD83	12;12;12;12;12;12;8;7;6;4	Heterogeneous nuclear ribonucleoprotein D0	HNRNPD	51	23.811	210	1.0642	23	1.058	23	1.2664	27	1.09697	27
P18085;C9JPM4;C9JAK5;U3KQF2	9;8;7;3	ADP-ribosylation factor 4	ARF4	56.1	20.511	180	1.0635	11	1.029	11	0.91689	13	0.888257	13
P11142;E9PKE3;P11142-2;E9PNE6;E9PN89;A8K7Q2;E9PLF4;E9PQQ4;E9PQK7;E9PK54;E9PS65;P54652;E9PPY6;E9PI65;E9PN25;E9PM13	31;30;24;22;17;17;12;11;11;11;10;10;9;9;7;7	Heat shock cognate 71 kDa protein	HSPA8	52	70.897	646	1.0633	54	1.0108	54	0.94001	64	0.937559	64
O00303;H0YDT6;E9PQV8	8;4;1	Eukaryotic translation initiation factor 3 subunit F	EIF3F	30.3	37.563	357	1.0628	12	0.94129	12	1.4204	9	1.20767	9
O00429-4;O00429-5;O00429-3;G8JLD5;O00429-2;O00429;O00429-8;O00429-6;O00429-7;H0YI79;F8W1W3;F8VUJ9;B4DDQ3;F8VZ52	3;3;3;3;3;3;3;3;2;1;1;1;1;1	Dynamin-1-like protein	DNM1L	4.4	78.099	699	1.0626	4	1.0273	4	0.945	3	0.805802	3
Q9NR31;Q9NR31-2;H0Y5E8;Q5SQT8	4;3;2;2	GTP-binding protein SAR1a	SAR1A	25.8	22.367	198	1.0622	4	1.0174	4	0.77731	4	0.783638	4
P53004;C9J1E1	3;2	Biliverdin reductase A	BLVRA	13.9	33.428	296	1.0619	2	0.99895	2	0.79204	4	0.820412	4
P56134-4;C9JJT5;P56134-3;P56134-2;P56134;C9JU26;G3V325	2;2;2;2;2;2;2	ATP synthase subunit f, mitochondrial	ATP5J2;PTCD1;ATP5J2-PTCD1	49	5.7407	49	1.0618	2	1.0649	2	1.3236	2	1.13973	2
O14737;K7ESJ4;O14737-2;Q3HM38;X6R2P6;K7EQA1	5;4;4;3;3;2	Programmed cell death protein 5	PDCD5	37.6	14.285	125	1.0617	4	1.029	4	1.0546	5	0.962094	5
Q01518;Q01518-2;Q5T0R7;Q5T0R6;Q5T0R5;Q5T0R4;Q5T0R3;Q5T0R2;Q5T0R1;Q5T0R9;Q5T0R8;Q5T0S3;P40123-3;B7Z385;A0A087X0J3;A0A087WZ15;P40123-2;E9PDI2;P40123	9;8;3;3;3;3;3;3;3;2;1;1;1;1;1;1;1;1;1	Adenylyl cyclase-associated protein 1	CAP1	26.5	51.901	475	1.0617	20	0.97997	20	1.0008	14	0.931099	14
P49756;P49756-2;P49756-3;E9PQU5;H0YE46	6;5;5;3;2	RNA-binding protein 25	RBM25	7.8	100.18	843	1.0606	6	0.98301	6	1.1572	6	1.00761	6
Q9UJZ1;Q9UJZ1-2;A0A087WYB4;F2Z2I8	5;4;3;1	Stomatin-like protein 2, mitochondrial	STOML2	24.2	38.534	356	1.0606	5	0.86336	5	1.3307	6	1.21883	6
P53680;M0R0N4;M0QYZ2;P53680-2;M0QZ21;X6R390;M0R1S0	4;4;4;3;3;3;1	AP-2 complex subunit sigma	AP2S1	25.4	17.018	142	1.0605	2	1.1253	2	0.96348	2	1.07776	2
P61981	10	14-3-3 protein gamma;14-3-3 protein gamma, N-terminally processed	YWHAG	44.1	28.302	247	1.0602	10	1.0121	10	1.0439	11	0.896218	11
O43719	2	HIV Tat-specific factor 1	HTATSF1	3.7	85.852	755	1.0602	2	0.95743	2	1.8515	1	1.16624	1
P52907	5	F-actin-capping protein subunit alpha-1	CAPZA1	26.2	32.922	286	1.0599	3	1.0109	3	0.88308	3	0.961723	3
Q9UPN3-3;Q9UPN3-2;H3BPE1;H3BQK9;Q9UPN3-4;Q9UPN3;H0Y390;Q9UPN3-5;E9PNZ4;E9PLY5;E9PS75;H0YD69;E9PLY0	20;20;20;20;19;19;17;14;6;4;1;1;1	Microtubule-actin cross-linking factor 1, isoforms 1/2/3/5	MACF1	4.7	614.15	5374	1.0597	17	1.0178	17	1.0422	15	1.01403	15
P61619;B4DR61;P61619-3;H7C1Q9;C9JXC6;H7C069;A6NK38;F2Z2C7;A6NIF9;C9JJV4;F8W776;Q8TC24;Q9H9S3-2;Q9H9S3-3;Q9H9S3	3;3;2;1;1;1;1;1;1;1;1;1;1;1;1	Protein transport protein Sec61 subunit alpha isoform 1	SEC61A1	7.6	52.264	476	1.0591	3	1.0753	3	1.0031	3	1.00737	3
Q96P11;Q96P11-2;Q96P11-4;Q96P11-5	2;2;2;1	Putative methyltransferase NSUN5	NSUN5	6.1	46.691	429	1.0588	2	0.97082	2	0.94748	2	1.00119	2
Q15691;C9JB30;Q9UPY8-2;Q9UPY8	9;1;1;1	Microtubule-associated protein RP/EB family member 1	MAPRE1	38.4	29.999	268	1.0581	11	1	11	1.0979	8	0.938438	8
F8WDD7;P59998;F8WCF6;P59998-2;A0A0A6YYG9;P59998-3;H7C0A3;F8WE39;F8WDW3;R4GN08;P59998-4	5;5;5;5;5;4;3;2;1;1;1	Actin-related protein 2/3 complex subunit 4	ARPC4;ARPC4-TTLL3	45.1	13.057	113	1.058	5	1.093	5	0.96502	7	0.968898	7
P07858;R4GMQ5	2;1	Cathepsin B;Cathepsin B light chain;Cathepsin B heavy chain	CTSB	10.3	37.821	339	1.058	3	0.86734	3	1.0477	1	1.05171	1
Q9Y2T2;E5RJ52;P53677;H0YBM0;H0YBA0;E7ER80;P53677-2	7;2;2;1;1;1;1	AP-3 complex subunit mu-1	AP3M1	23.9	46.939	418	1.0578	8	0.77358	8	1.2616	7	0.954927	7
Q6P2E9;Q6P2E9-2	5;2	Enhancer of mRNA-decapping protein 4	EDC4	5.4	151.66	1401	1.0574	4	1.141	4	1.3519	3	0.963484	3
Q15029-2;Q15029;Q15029-3;K7EP67;K7EJ74	22;22;21;8;5	116 kDa U5 small nuclear ribonucleoprotein component	EFTUD2	30.3	105.38	937	1.0562	20	0.97303	20	1.085	20	1.16653	20
Q6ZN17;Q6ZN17-2;Q9H9Z2	10;7;1	Protein lin-28 homolog B	LIN28B	54	27.083	250	1.0561	12	0.85988	12	1.1904	11	1.11732	11
P22307-6;P22307-2;P22307-4;P22307-7;P22307-8;P22307;H0YF61	5;5;5;5;5;5;3	Non-specific lipid-transfer protein	SCP2	36.4	15.079	140	1.0549	4	1.0053	4	0.94154	4	0.900333	4
P11387;E5RIC7;Q969P6-2;Q969P6;E5RJ95;E5RFS0	10;2;2;2;1;1	DNA topoisomerase 1	TOP1	14.2	90.725	765	1.0548	12	0.9209	12	0.80189	13	0.909422	13
Q9Y295	5	Developmentally-regulated GTP-binding protein 1	DRG1	22.6	40.542	367	1.0545	4	1.039	4	0.9409	3	0.924813	3
Q9NU22;Q5T795	11;2	Midasin	MDN1	2.7	632.81	5596	1.0542	7	0.99407	7	1.0304	8	0.937734	8
F5GWX5;Q14839;A0A0C4DGG9;Q14839-2;Q8TDI0;Q12873-2;Q12873;Q12873-3;K7EMY3;K7EPV1;F6T542;K7ESA5;I3L229;H7C3H7;H7C0J3;F2Z2R5	16;16;16;16;6;6;6;6;5;1;1;1;1;1;1;1	Chromodomain-helicase-DNA-binding protein 4	CHD4	11.1	217.1	1905	1.0531	17	0.97394	17	1.6973	17	0.913576	17
P55735-2;P55735;A0A0C4DFR6;P55735-3;A8MXL6;E7ERC8	6;6;6;6;5;1	Protein SEC13 homolog	SEC13	27.9	34.011	308	1.0528	5	1.0857	5	1.0242	5	0.99453	5
D6RAA6;P57088;H0Y8N0	2;2;1	Transmembrane protein 33	TMEM33	9.9	25.223	222	1.0526	2	0.96191	2	0.80646	2	0.77688	2
Q9BQ04;Q9BWF3-4;E9PB51;Q9BWF3;Q9BWF3-3;E9PLB0;E9PM61;D6R9K7;U3KQD5;J3QRR5;Q9BWF3-2	5;4;4;4;3;3;3;3;3;3;3	RNA-binding protein 4B;RNA-binding protein 4	RBM4B;RBM4	14.8	40.149	359	1.0518	3	1.4741	3	1.2153	4	1.64112	4
Q7Z4V5-2;Q7Z4V5;Q7Z4V5-4;Q7Z4V5-3;K7EPS6;K7ERA4;A0A087WX58;A0A087WZ99;M0R0J3;Q9Y3E1;A0A024R216	5;5;4;4;3;2;1;1;1;1;1	Hepatoma-derived growth factor-related protein 2	HDGFRP2	9	74.229	670	1.0517	9	0.81884	9	1.6767	8	0.891345	8
O75569-3;O75569-2;O75569;F8WEG8;G5E9Q4;C9JMM3	3;3;3;1;1;1	Interferon-inducible double stranded RNA-dependent protein kinase activator A	PRKRA	16.7	31.635	288	1.0516	2	0.91643	2	0.83023	3	0.678288	3
P14174	3	Macrophage migration inhibitory factor	MIF	35.7	12.476	115	1.0511	4	0.92426	4	1.2555	5	1.07745	5
Q8N0U8	2	Vitamin K epoxide reductase complex subunit 1-like protein 1	VKORC1L1	11.4	19.835	176	1.0508	2	1.1522	2	1.152	2	0.870019	2
P49368-2;P49368;B4DUR8;E9PRC8;Q5SZX6;E9PQ35;E9PM09;Q5SZX9;Q5SZW8	18;18;17;3;3;2;1;1;1	T-complex protein 1 subunit gamma	CCT3	40.8	56.43	507	1.0508	18	1.0675	18	1.1154	16	1.03608	16
M0QZI4;Q8IV08	2;2	Phospholipase D3	PLD3	10	22.463	201	1.0507	2	1.4935	2	0.84263	2	1.06142	2
P35080-2;G5E9Q6;C9J0J7;C9JQ45;C9J2N0	7;7;6;5;4	Profilin-2;Profilin	PFN2	60.7	15.088	140	1.05	7	1.0759	7	1.0917	5	0.890789	5
O15260-2;Q5T8U5;O15260;O15260-3;B7Z1G8	2;2;2;1;1	Surfeit locus protein 4	SURF4	18.2	17.97	159	1.0489	7	1.0148	7	0.7961	5	0.892538	5
P67809;A0A087X1S2;H0Y449;C9J5V9;Q9Y2T7	12;9;9;7;4	Nuclease-sensitive element-binding protein 1	YBX1	51.9	35.924	324	1.0489	21	0.71392	21	1.2066	24	0.785114	24
Q99613;B5ME19;Q99613-2;H3BPE3;H3BPE4;H3BTY8	20;19;18;4;4;3	Eukaryotic translation initiation factor 3 subunit C;Eukaryotic translation initiation factor 3 subunit C-like protein	EIF3C;EIF3CL	21	105.34	913	1.0486	35	1.0104	35	1.5088	30	1.08496	30
O75947;O75947-2;F5H608	5;4;3	ATP synthase subunit d, mitochondrial	ATP5H	27.3	18.491	161	1.048	4	0.97026	4	1.2759	5	1.15271	5
H3BPC4;H3BQQ9;P63279;B0QYN7	4;4;4;4	SUMO-conjugating enzyme UBC9	UBE2I	45.7	7.8891	70	1.0479	4	1.0664	4	0.88139	8	0.921319	8
Q04837;C9K0U8;A0A0G2JLD8;E7EUY5	6;5;5;5	Single-stranded DNA-binding protein, mitochondrial	SSBP1	49.3	17.259	148	1.0474	7	0.98605	7	1.0308	6	0.910167	6
P63010;P63010-2;A0A087WU93;A0A087WZQ6;P63010-3;A0A087X253;A0A087WYD1;K7EN71;K7ERB2;K7EJ01;A0A087WXS3;K7EKZ5;K7EJX1	14;14;13;13;13;11;10;4;4;3;1;1;1	AP-2 complex subunit beta	AP2B1	17.2	104.55	937	1.0474	3	0.84751	3	0.8186	3	0.912825	3
Q8NBJ5	1	Procollagen galactosyltransferase 1	COLGALT1	1.3	71.635	622	1.0473	2	1.0496	2	1.1214	1	0.843739	1
Q06830;A0A0A0MSI0;A0A0A0MRQ5	16;13;8	Peroxiredoxin-1	PRDX1	85.4	22.11	199	1.0471	29	1.0403	29	1.0238	29	1.0258	29
F5GYN4;Q96FW1;J3KR44;F5H6Q1;F5H3F0;F5GYJ8;Q96FW1-2	4;4;4;4;3;3;3	Ubiquitin thioesterase OTUB1	OTUB1	21.6	28.05	241	1.0469	3	1.0552	3	0.76607	4	0.922679	4
F8W1I6;Q13561;Q13561-3;Q13561-2;H0YI98;F8VW18;H0YHL1;F8VX93;F8VRV7	4;4;4;4;3;3;1;1;1	Dynactin subunit 2	DCTN2	16.8	34.258	315	1.0468	4	1.2938	4	1.4232	3	1.1941	3
H7C4M9;C9JZG9;C9JZY6;P62256-2;P62256;C9J8Q9	3;3;3;3;3;1	Ubiquitin-conjugating enzyme E2 H	UBE2H	64.5	7.0801	62	1.0467	3	0.95747	3	1.0752	3	1.13679	3
P60709;G5E9R0;E7EVS6;C9JZR7;C9JTX5;A5A3E0	21;10;10;9;8;7	Actin, cytoplasmic 1;Actin, cytoplasmic 1, N-terminally processed	ACTB	64.8	41.736	375	1.0464	51	1.029	51	0.93548	63	1.0063	63
Q7L576;Q7L576-2;Q7L576-3;A0A0G2JR96;A0A0G2JQT1;H0YL50;A0A0G2JQH3;A0A087WVZ5	10;7;6;4;4;3;1;1	Cytoplasmic FMR1-interacting protein 1	CYFIP1	9.7	145.18	1253	1.0461	9	1.0254	9	0.95683	10	0.937559	10
Q5JP53;P07437;Q5ST81;A0A075B736;Q5SQY0;I3L2F9;A6NNZ2;Q9H4B7;CON__ENSEMBL:ENSBTAP00000025008	19;19;16;6;6;6;6;3;3	Tubulin beta chain	TUBB	63.8	47.766	426	1.0456	24	1.0763	24	1.0898	24	1.14764	24
Q13813;Q13813-2;A0A0D9SGF6	100;99;99	Spectrin alpha chain, non-erythrocytic 1	SPTAN1	51.1	284.54	2472	1.0456	168	1.0281	168	1.1181	157	1.01287	157
Q15024	3	Exosome complex component RRP42	EXOSC7	16.2	31.821	291	1.0454	2	1.1578	2	1.3345	3	0.929195	3
P40227;P40227-2;Q92526;Q92526-2;Q92526-3;J3KRI6	16;13;4;3;3;1	T-complex protein 1 subunit zeta	CCT6A	40.3	58.024	531	1.0451	21	1.0441	21	1.1009	19	0.987849	19
O94826	3	Mitochondrial import receptor subunit TOM70	TOMM70A	5.8	67.454	608	1.0439	2	1.0343	2	0.68969	4	1.03107	4
P53992;G5EA31;P53992-2	14;13;5	Protein transport protein Sec24C	SEC24C	15.9	118.32	1094	1.0436	11	0.918	11	1.0705	10	1.09088	10
Q96CT7;M0R2F5	7;3	Coiled-coil domain-containing protein 124	CCDC124	31.4	25.835	223	1.0435	9	1.0433	9	1.7377	4	0.758898	4
P31946-2;P31946;Q4VY20;Q4VY19;A0A0J9YWE8;A0A0J9YWZ2	11;11;3;3;3;2	14-3-3 protein beta/alpha;14-3-3 protein beta/alpha, N-terminally processed	YWHAB	50	27.85	244	1.0433	11	1.0963	11	1.0984	11	0.924556	11
CON__Q8VED5	9			10.5	57.552	531	1.043	1	1.0292	1	1.112	2	1.39158	2
Q9UDY2-5;Q9UDY2-4;Q9UDY2-2;Q9UDY2-6;Q9UDY2-3;Q9UDY2;Q9UDY2-7	2;2;2;2;2;2;2	Tight junction protein ZO-2	TJP2	2.5	111.66	993	1.0427	2	1.4683	2	3.0203	2	2.87778	2
P22392-2;Q32Q12;P22392;J3KPD9;E7ERL0;E5RHP0;F6XY72;C9K028	14;14;11;11;9;6;5;3	Nucleoside diphosphate kinase B;Nucleoside diphosphate kinase	NME2;NME1-NME2;NME1	64.4	30.137	267	1.0427	21	1.0362	21	0.99117	23	0.939144	23
P14927;P14927-2;B7Z2R2;E5RHG9	4;3;3;2	Cytochrome b-c1 complex subunit 7	UQCRB	34.2	13.53	111	1.0423	4	0.92768	4	1.4021	4	1.35183	4
P43363;P43358;C9J9A2;C9J958;O60732-2;Q3SYA6;P43355;P43362;P43361;A2A368;A8MXT2;Q96M61;Q8TD91-2;O15480;A0A0A0MSA3;O60732	3;2;1;1;1;1;1;1;1;1;1;1;1;1;1;1	Melanoma-associated antigen 10;Melanoma-associated antigen 4	MAGEA10;MAGEA4	9.2	40.78	369	1.0423	3	0.92356	3	0.98633	3	0.96768	3
Q1KMD3;H3BQZ7	9;8	Heterogeneous nuclear ribonucleoprotein U-like protein 2	HNRNPUL2;hCG_2044799	16.7	85.104	747	1.0418	8	1.1427	8	1.3891	8	1.28957	8
P62487;E9PIU7;H0YEE4;E9PKH3	4;2;2;2	DNA-directed RNA polymerase II subunit RPB7	POLR2G	25.6	19.294	172	1.0416	4	0.95097	4	NaN	0	NaN	0
Q9Y6G9;E9PHI6;C9JGM7;C9JLW1;B4E2E0	7;4;2;2;1	Cytoplasmic dynein 1 light intermediate chain 1	DYNC1LI1	16.8	56.578	523	1.0406	7	0.98759	7	1.5037	5	1.13941	5
Q13620-3;Q13620-1;K4DI93;Q13620;Q13619-2;A0A0A0MR50;Q13619;A6NE76;A0A087WWN2	4;4;4;4;3;3;3;2;1	Cullin-4B;Cullin-4A	CUL4B;CUL4A	6.1	84.016	717	1.0404	4	1.1055	4	1.0937	4	0.923446	4
Q00688;G3V5F2	3;1	Peptidyl-prolyl cis-trans isomerase FKBP3	FKBP3	15.2	25.177	224	1.0403	3	0.9578	3	0.84324	3	0.788457	3
O95486;O95486-2;H0Y9J6	13;4;1	Protein transport protein Sec24A	SEC24A	14.8	119.75	1093	1.04	13	1.0028	13	1.0147	12	1.07203	12
Q92905;E5RHH5;E5RHF2	6;3;1	COP9 signalosome complex subunit 5	COPS5	17.1	37.578	334	1.0398	4	0.9852	4	1.2488	5	0.950029	5
P63151;P63151-2;Q66LE6;E5RIY1;E5RFR9;Q00005-6;Q00005;Q00005-2;Q00005-3;Q00005-4;Q00005-5;Q00005-7	3;3;2;1;1;1;1;1;1;1;1;1	Serine/threonine-protein phosphatase 2A 55 kDa regulatory subunit B alpha isoform;Serine/threonine-protein phosphatase 2A 55 kDa regulatory subunit B delta isoform	PPP2R2A;PPP2R2D	8.1	51.691	447	1.039	3	1.0663	3	0.97162	4	1.10311	4
O00203-3;O00203;Q13367;Q13367-4;F5GWU4;Q13367-3;F5GYB0;H0YBD0	27;27;5;5;3;3;2;2	AP-3 complex subunit beta-1	AP3B1	30.5	116.19	1045	1.0387	30	0.84787	30	1.1868	26	0.950932	26
P17066;P48741	7;4	Heat shock 70 kDa protein 6;Putative heat shock 70 kDa protein 7	HSPA6;HSPA7	12.8	71.027	643	1.0384	2	1.0238	2	0.91706	2	0.947867	2
Q9UNM6;J3KNQ3;A0A087WUL9;Q9UNM6-2;E9PL38;H0YD73;E9PQG3;E9PPD2;F8W8J6	12;11;11;11;7;6;3;2;1	26S proteasome non-ATPase regulatory subunit 13	PSMD13	37.2	42.945	376	1.0384	13	1.0212	13	1.0447	11	1.03425	11
Q92614-2;Q92614-3;A0A0D9SFK2;Q92614-4;Q92614;Q92614-5;H0YEV9	6;6;6;6;6;4;2	Unconventional myosin-XVIIIa	MYO18A	4.9	196.44	1723	1.0383	4	0.97947	4	1.5715	3	1.01479	3
C9J3L8;C9J5W0;P43307;E9PAL7;C9IZQ1;P43307-2	3;3;3;3;3;2	Translocon-associated protein subunit alpha	SSR1	12.8	29.573	265	1.0381	3	1.0616	3	1.2742	3	1.15421	3
P51532-5;P51532-2;P51532-3;P51532-4;P51532;Q9HBD4;A0A0A0MT49;P51531-2;P51531;K7EP28	8;8;8;8;8;8;8;3;3;1	Transcription activator BRG1	SMARCA4	6.1	181.26	1613	1.0381	13	1.0022	13	1.8142	10	1.07763	10
P51149;C9J592;C9J8S3;C9J4S4;C9IZZ0;C9J4V0;C9J7D1	8;7;4;3;3;3;2	Ras-related protein Rab-7a	RAB7A	44.4	23.489	207	1.0376	9	1.004	9	1.1244	6	1.10364	6
F5H365;Q15436;Q15436-2;G3V4V1;G3V1W4;G3V3G5;G3V2R6;G3V5X8;G3V4Q2;G3V5K1	15;15;10;5;5;5;5;3;3;2	Protein transport protein Sec23A	SEC23A	28.1	82.968	736	1.0374	13	1.0503	13	1.1286	15	1.11188	15
Q9NP81;M0QWZ7;Q9NP81-2;M0R2C6;M0QX29;B4DJM9;M0R259	2;2;2;2;1;1;1	Serine--tRNA ligase, mitochondrial	SARS2	6.9	58.282	518	1.0371	2	1.0849	2	0.96316	1	1.10606	1
Q9BWJ5	2	Splicing factor 3B subunit 5	SF3B5	25.6	10.135	86	1.0369	3	1.0587	3	1.2696	3	1.00828	3
P25787;A0A024RA52;C9JCK5;H3BT36	6;6;3;1	Proteasome subunit alpha type-2	PSMA2	40.6	25.898	234	1.0368	6	0.95215	6	1.1565	7	1.0688	7
Q9BPX3;H0Y9Z8	4;1	Condensin complex subunit 3	NCAPG	5.1	114.33	1015	1.0365	3	1.1031	3	1.0436	3	0.811622	3
P00533-4;A0A0B4J1Y5;P00533-3;Q504U8;E9PFD7;P00533;C9JYS6;P00533-2	3;3;3;3;3;3;2;2	Epidermal growth factor receptor	EGFR	6.5	69.227	628	1.0357	3	1.017	3	0.85484	3	0.947777	3
R4GMY8;E5RHG8;Q15369-2;Q15369	2;2;2;2	Transcription elongation factor B polypeptide 1	TCEB1	33.8	6.968	65	1.0356	2	1.063	2	1.2864	2	1.02974	2
P48729-3;P48729;D6REM4;Q8N752;P48729-2;E5RG27;D6RGE5;U3KPX3;H0Y9X2;U3KQK7;E7ETM0	3;3;2;2;2;1;1;1;1;1;1	Casein kinase I isoform alpha;Casein kinase I isoform alpha-like	CSNK1A1;CSNK1A1L	8.6	37.567	325	1.0355	3	1.0811	3	1.1421	3	1.1878	3
O00483	2	NADH dehydrogenase [ubiquinone] 1 alpha subcomplex subunit 4	NDUFA4	27.2	9.3697	81	1.0355	2	1.0626	2	1.4773	2	1.13794	2
P15531;P15531-2	11;11	Nucleoside diphosphate kinase A	NME1	73.7	17.149	152	1.0354	2	0.95322	2	0.86732	3	0.910249	3
Q99832-3;Q99832;Q99832-4;Q99832-2;F8WAM2	17;17;13;10;6	T-complex protein 1 subunit eta	CCT7	45.9	54.804	499	1.0351	19	1.0459	20	1.1015	18	1.03052	18
Q14152;Q14152-2	44;41	Eukaryotic translation initiation factor 3 subunit A	EIF3A	33.4	166.57	1382	1.0351	49	1.0361	49	1.4036	43	1.09242	43
Q14108	1	Lysosome membrane protein 2	SCARB2	4	54.29	478	1.035	2	1.0263	2	0.67163	1	0.935279	1
P55884;P55884-2;C9JZG1;C9JQN7	27;27;12;8	Eukaryotic translation initiation factor 3 subunit B	EIF3B	38.7	92.48	814	1.0348	30	1.0227	30	1.2984	27	1.05022	27
Q9H0U4;E9PLD0;P62820;P62820-2;E7END7;Q92928;A0A087WTI1;P62820-3;H0YLJ8;H0YL94;H0YMN7;P51153;P61006-2;P59190-2;P59190	8;7;5;4;4;4;3;2;1;1;1;1;1;1;1	Ras-related protein Rab-1B;Ras-related protein Rab-1A;Putative Ras-related protein Rab-1C	RAB1B;RAB1A;RAB1C	57.2	22.171	201	1.0348	12	1.0004	12	0.78457	8	0.886446	8
Q92945;A0A087WTP3;M0R0I5;M0QXW7;M0QYH3;C9JSZ1;Q96AE4;Q96AE4-2;E9PEB5	6;6;4;3;3;1;1;1;1	Far upstream element-binding protein 2	KHSRP	8.9	73.114	711	1.0341	5	1.1307	5	1.0578	4	1.021	4
Q9NYU2-2;Q9NYU2	12;12	UDP-glucose:glycoprotein glucosyltransferase 1	UGGT1	12.8	174.97	1531	1.0339	15	0.93977	15	0.85135	7	0.924984	7
B1AJY5;B1AJY7;O75832	2;2;2	26S proteasome non-ATPase regulatory subunit 10	PSMD10	8.1	20.217	185	1.0338	4	0.91647	4	1.2837	2	1.02764	2
P62136;P62136-2;E9PMD7;P62136-3;F5H1L6;F5H037;H0Y3Y6;F8WE71	12;12;9;9;3;3;2;1	Serine/threonine-protein phosphatase PP1-alpha catalytic subunit;Serine/threonine-protein phosphatase	PPP1CA	40.9	37.512	330	1.0337	12	0.96605	12	1.0335	10	1.03197	10
P00441;H7BYH4	4;3	Superoxide dismutase [Cu-Zn]	SOD1	32.5	15.936	154	1.0331	3	0.97655	3	0.8446	8	0.849907	8
P62310	2	U6 snRNA-associated Sm-like protein LSm3	LSM3	32.4	11.845	102	1.0331	3	0.93403	3	1.2082	3	0.983768	3
Q9NQP4;E9PQY2	2;2	Prefoldin subunit 4	PFDN4	20.1	15.314	134	1.033	2	1.2261	2	1.005	2	1.01355	2
E9PN17;O75964	5;5	ATP synthase subunit g, mitochondrial	ATP5L	63.2	8.4518	76	1.033	5	1.1229	5	1.3115	4	1.11635	4
P07237;H7BZ94;H0Y3Z3;I3L312;I3L398;I3NI03;I3L3U6;I3L4M2;I3L0S0;I3L3P5;I3L514;I3L1Y5	27;24;14;12;11;7;7;6;6;5;3;2	Protein disulfide-isomerase	P4HB	56.1	57.116	508	1.0326	34	0.92754	34	0.87223	33	0.954654	33
H3BPF6;Q99471;Q99471-2;H3BMQ1;Q99471-3	3;3;2;1;1	Prefoldin subunit 5	PFDN5	27	17.047	152	1.0325	4	1.0475	4	0.97515	4	0.940115	4
P36542-2;P36542	6;6	ATP synthase subunit gamma, mitochondrial	ATP5C1	27.6	32.881	297	1.0321	6	1.0387	6	1.3021	8	1.09314	8
F5H1S9;G8JLB3;Q9Y606-2;Q9Y606;F5GY32;F5H168;F8W9U5;F5H1B2;F5GXL3	5;5;5;5;2;1;1;1;1	tRNA pseudouridine synthase;tRNA pseudouridine synthase A, mitochondrial	PUS1	15.8	41.729	374	1.0321	5	0.95141	5	1.3194	5	1.06542	5
O75822-2;O75822;O75822-3;H0YGJ7;H0YLP3	4;4;3;1;1	Eukaryotic translation initiation factor 3 subunit J	EIF3J	21.1	22.941	204	1.0317	4	1.0644	4	1.1952	3	1.03025	3
Q6P2Q9;I3L0J9;I3L3Z8;I3L1T8	85;36;10;1	Pre-mRNA-processing-splicing factor 8	PRPF8	44.7	273.6	2335	1.0317	79	0.99366	79	1.0766	86	1.11949	86
Q96DI7;Q96DI7-2;Q9NSS8	3;3;2	U5 small nuclear ribonucleoprotein 40 kDa protein	SNRNP40;DKFZp434D199	9	39.31	357	1.0315	3	0.94099	3	1.1367	2	1.18725	2
C9J1Z8;P84085;F5H1V1;F5H6T5;F8WDB3	7;7;1;1;1	ADP-ribosylation factor 5	ARF5	57.3	17.107	150	1.0314	2	1.0675	2	0.68644	3	0.775134	3
Q14204;H0YJ21	197;8	Cytoplasmic dynein 1 heavy chain 1	DYNC1H1	51	532.4	4646	1.0313	206	1.0212	206	1.0003	214	0.972857	215
P08237;P08237-3;P08237-2;F8VX13;F8VNX2;F8VZQ1;F8VSL1;F8VW30;F8VZI0;F8VP00;F8W1J8;F8VSF7;F8VUB8;F8VYK8;F8VTQ3;F8VVE3	8;8;7;4;4;4;3;2;2;2;1;1;1;1;1;1	6-phosphofructokinase, muscle type	PFKM	11.4	85.182	780	1.0311	8	0.97593	8	0.85288	7	0.929541	7
O14976-2;O14976;D6RF16;D6RAQ7;D6RE78;D6RAW3;A0A087X1U9	2;2;1;1;1;1;1	Cyclin-G-associated kinase	GAK	3.2	134.46	1232	1.0306	3	1.0391	3	0.94524	3	0.964041	3
P30046;P30046-2;J3KQ18;A6NHG4;B5MC82;H7C342	5;4;4;4;4;1	D-dopachrome decarboxylase;D-dopachrome decarboxylase-like protein	DDT;DDTL	46.6	12.712	118	1.0306	6	0.9365	6	0.875	5	0.93006	5
Q9UL46;A0A087X1Z3;H0YM70;H0YKU2	6;6;5;2	Proteasome activator complex subunit 2	PSME2	37.7	27.401	239	1.0304	5	1.0941	5	0.76511	4	0.887626	4
Q8TEX9;Q8TEX9-2;H0YN07;H0YMR4;H0YLV0;H0YL92;H0YN14	3;3;2;2;1;1;1	Importin-4	IPO4	3	118.71	1081	1.0303	1	1.227	1	0.96966	3	1.16087	3
Q15126	2	Phosphomevalonate kinase	PMVK	15.1	21.995	192	1.03	2	1.0475	2	1.3221	1	0.913826	1
O95059	3	Ribonuclease P protein subunit p14	RPP14	33.1	13.693	124	1.0297	3	0.97085	3	1.4099	3	1.11736	3
B2WTI3;B2WTI4;Q6NYC1-2;K7EJU9;Q6NYC1;Q6NYC1-3	2;2;2;2;2;2	Bifunctional arginine demethylase and lysyl-hydroxylase JMJD6	JMJD6	8.1	39.241	335	1.0295	2	0.6816	2	0.89361	2	0.863632	2
Q96A33;Q96A33-2;A0A087WYW6	3;2;1	Coiled-coil domain-containing protein 47	CCDC47	5.6	55.873	483	1.0292	3	0.97286	3	0.80828	3	1.12722	3
P19623;K7EL89;K7EKM4;K7ESL0	3;1;1;1	Spermidine synthase	SRM	10.3	33.824	302	1.029	3	1.1192	3	0.7814	2	0.785484	2
M0QZS6;Q9UBE0;M0QX65;Q9UBE0-2;Q9UBE0-3;B3KNJ4	2;2;1;1;1;1	SUMO-activating enzyme subunit 1;SUMO-activating enzyme subunit 1, N-terminally processed	SAE1	10.2	29.422	265	1.0281	2	1.062	2	1.1725	3	1.01224	3
P61586;C9JNR4;C9JX21;C9JRM1;P62745	6;5;5;3;2	Transforming protein RhoA	RHOA	45.1	21.768	193	1.0279	2	1.107	2	0.80023	2	0.93668	2
P54687-4;P54687;P54687-5;F5H2F2;P54687-2;P54687-3;A0A087WYF2	3;3;3;2;2;2;1	Branched-chain-amino-acid aminotransferase, cytosolic	BCAT1	11.4	42.837	385	1.0279	3	0.90008	3	0.9495	5	0.914746	5
E9PB93;E9PHV4;O15514	1;1;1	DNA-directed RNA polymerase II subunit RPB4	POLR2D	15.4	12.267	104	1.0279	2	0.86626	2	1.4189	2	1.40692	2
P07942;G3XAI2;E7EPA6	6;6;2	Laminin subunit beta-1	LAMB1	4.9	198.04	1786	1.0278	5	0.99601	5	0.80332	7	0.951928	7
O95197-3;O95197-4;O95197-7;O95197-2;O95197;O95197-5	2;2;2;2;2;1	Reticulon-3	RTN3	9.7	25.609	236	1.0276	3	1.0022	3	0.96843	3	1.09011	3
Q13885;Q9BVA1	17;16	Tubulin beta-2A chain;Tubulin beta-2B chain	TUBB2A;TUBB2B	55.1	49.906	445	1.0275	9	1.0274	9	0.90853	7	1.1602	7
E9PFH4;Q9Y5L0-3;Q9Y5L0;Q9Y5L0-1;C9J7E5;Q9Y5L0-5	4;4;4;4;4;3	Transportin-3	TNPO3	9.2	96.669	857	1.0273	4	0.97318	4	0.93919	4	0.96432	4
Q9UK58-5;Q9UK58-4;C9JPL0;Q9UK58	2;2;2;2	Cyclin-L1	CCNL1	14.5	18.322	172	1.0271	3	1.0412	3	1.0979	3	1.16903	3
O15371-2;O15371-3;O15371;B0QYA4;B0QYA5;B0QYA8;B0QYA6	7;7;7;2;2;1;1	Eukaryotic translation initiation factor 3 subunit D	EIF3D	15.6	58.14	499	1.0269	7	1.0624	7	1.3709	6	0.980488	6
K7ENP1;Q7Z4G4-3;Q7Z4G4-2;Q7Z4G4;K7EPZ4;K7EJQ4;Q5JY01;Q5JY02	2;2;2;2;1;1;1;1	tRNA (guanine(10)-N2)-methyltransferase homolog	TRMT11	11.7	26.453	230	1.0266	2	1.0607	2	1.4487	1	0.959325	1
Q01658	1	Protein Dr1	DR1	7.4	19.443	176	1.0266	1	1.0004	1	1.325	2	0.938879	2
Q13243;Q13243-3;B4DJK0;B4DUA4;G3V5K8;Q13243-2	6;5;3;3;2;2	Serine/arginine-rich splicing factor 5	SRSF5	25	31.263	272	1.0263	8	0.9091	9	1.2814	5	1.30647	5
Q96FX7;H0Y2Q1	2;1	tRNA (adenine(58)-N(1))-methyltransferase catalytic subunit TRMT61A	TRMT61A	9.7	31.381	289	1.0258	1	1.1473	1	0.88375	2	1.32679	2
F8W118;F8VY35;F8VV59;P55209-2;F5H4R6;H0YIV4;P55209;F8VRJ2;H0YH88;H0YHC3;F8W020;F8W543;B7Z9C2;F8W0J6;F8VXI6;F8VUX1;P55209-3;F8VVB5	6;6;6;6;6;6;6;5;5;5;5;5;5;5;4;4;4;3	Nucleosome assembly protein 1-like 1	NAP1L1	39.2	24.694	209	1.0258	12	1.013	12	0.91764	13	1.10481	13
P50990-2;P50990;P50990-3;H7C4C8;H7C2U0	22;22;20;11;4	T-complex protein 1 subunit theta	CCT8	50.5	57.645	529	1.0257	23	1.0628	23	1.1308	21	1.10082	20
Q9UNZ2-4;Q9UNZ2;Q9UNZ2-5;Q9UNZ2-6;F2Z2K0;R4GNE6	5;5;5;3;3;1	NSFL1 cofactor p47	NSFL1C	19.2	37.325	339	1.0255	6	1.0676	6	1.0925	7	0.949758	7
[truncated: 836 more rows]
