# Supplementary material
Source: HighWire-hosted journal article supplement (doi:10.1101/rna.064006.117)
Supplement: Supplemental_Table_S2.xlsx [file Supplemental_Table_S2.xlsx]

## Sheet: Primers
Primers	#	Name	Sequence (5'-3')
For plasmid construction	1	DENV1 3'UTR (10274-10735) F	CGC GGA TCC GTC AAC ACG TTT ACA AAA TAA AGG
	2	DENV1 3'UTR (10274-10735) R	CGC CTC GAG AGA ACC TGT TGA TTC AAC AGC
	3	DENV2 3'UTR (10273-10723) F	CGC GGA TCC AAA GCA GAA ACA TCA TGA GAC
	4	DENV2 3'UTR (10273-10723) R	CGC CTC GAG AGA ACC TGT TGA TTC AAC AGC
	5	DENV3 3'UTR (10268-10706) F	CGC GGA TCC ATG TAG GAA GTG AAA AAG AGG C
	6	DENV3 3'UTR (10268-10706) R	CGC CTC GAG GAA CCT GTT GAT TCA ACA GCA C
	7	DENV4 3'UTR (10267-10653) F	CGC GGA TCC TTA CTA ATA ACA AAC ACC AAA GAG
	8	DENV4 3'UTR (10267-10653) R	CGC CTC GAG AGA ACC TGT TGG ATC AAC AAC
	9	DENV2 NGC NS2A (3739-4224) F	CGC GGA TCC GCA GCT GGA CTA CTC TTG AG
	10	DENV2 NGC NS2A (3739-4224) R	CGC CTC GAG TGG TCC TGT CAT GGG AAT GTC
	11	DENV4 3'UTR mut1 (10295-10369) F	CGC GGA TCC TTG AAG TCA GGC CAC TTG TGC
	12	DENV4 3'UTR mut1 (10295-10369) R	CGC CTC GAG TTA CGC CTC CCA TTA TTG GCG
	13	DENV4 3'UTR mut2 (10370-10653) F	CGC GGA TCC AAT TCC CAG GGA GGC CAT G
	14	DENV4 3'UTR mut2 (10370-10653) R	CGC CTC GAG AGA ACC TGT TGG ATC AAC AAC
	15	DENV4 3'UTR mut3 (10295-10469) F	CGC GGA TCC TTG AAG TCA GGC CAC TTG TGC
	16	DENV4 3'UTR mut3 (10295-10469) R	CGC CTC GAG TTT TTG CTG CGT TTT GTC AGT G
	17	DENV4 3'UTR mut4 (10267-10369) F	CGC GGA TCC TTA CTA ATA ACA AAC ACC AAA GAG
	18	DENV4 3'UTR mut4 (10267-10369) R	CGC CTC GAG TTA CGC CTC CCA TTA TTG GCG
	19	DENV4 3'UTR mut5 (10267-10469) F	CGC GGA TCC TTA CTA ATA ACA AAC ACC AAA GAG
	20	DENV4 3'UTR mut5 (10267-10469) R	CGC CTC GAG TTT TTG CTG CGT TTT GTC AGT G
	21	DENV4 3'UTR mut6 F	CGC GGA TCC TTT CCT GTA ACA AAC ACC AAA GAG ACC ATT G
	22	DENV4 3'UTR mut6 R	CGC CTC GAG AGA ACC TGT TGG ATC AAC AAC
	23	DENV4 3'UTR mut7 F	CGC GGA TCC TTA CTA ACT GCA AAC ACC AAA GAG ACC ATT G
	24	DENV4 3'UTR mut7 R	CGC CTC GAG AGA ACC TGT TGG ATC AAC AAC
	25	DENV4 3'UTR mut8 F	CGC GGA TCC TTT CCT GCT GCA AAC ACC AAA GAG ACC ATT G
	26	DENV4 3'UTR mut8 R	CGC CTC GAG AGA ACC TGT TGG ATC AAC AAC
	27	DENV4 3'UTR mut9 F	CGC GGA TCC TTT CCT GTA ACA AAC ACC AAA GAG ACC ATT G
	28	DENV4 3'UTR mut9 R	CGC CTC GAG TTA CGC CTC CCA TTA TTG GCG
	29	DENV4 3'UTR mut10 F	CGC GGA TCC TTA CTA ACT GCA AAC ACC AAA GAG ACC ATT G
	30	DENV4 3'UTR mut10 R	CGC CTC GAG TTA CGC CTC CCA TTA TTG GCG
	31	DENV4 3'UTR mut11 F	CGC GGA TCC TTT CCT GCT GCA AAC ACC AAA GAG ACC ATT G
	32	DENV4 3'UTR mut11 R	CGC CTC GAG TTA CGC CTC CCA TTA TTG GCG
	33	DENV2 3'UTR mut1 F	CGC GGA TCC AAA CTA ATA ACA TCA TGA G
	34	DENV2 3'UTR mut1 R	CGC CTC GAG AGA ACC TGT TGA TTC AAC AGC
For construction of viruses	35	D2-CMV-5’UTR-Env F	AGA GCT CGT TTA GTG AAC CGA GTT GTT AGT CTA CGT GGA CCG AC
	36	D2-CMV-5’UTR-Env R	GCT GTG TCA CCT AAA ATG GCC ATT CTC TTC
	37	D2-Env-NS1-NS2A F	GAA GAG AAT GGC CAT TTT AGG TGA CAC AGC
	38	D2-Env-NS1-NS2A R	GGA ACA ATG CCA TTC CCA AGA CTC CTA GTG
	39	D2-NS2A-NS2B-NS3 F	CAC TAG GAG TCT TGG GAA TGG CAT TGT TCC
	40	D2-NS2A-NS2B-NS3 R	GGA GAT CCT GAC GTT CCA GGA GAA AAG TCC
	41	D2-NS3-NS4A-NS4B F	GGA CTT TTC TCC TGG AAC GTC AGG ATC TCC
	42	D2-NS3-NS4A-NS4B R	GGA ATT TTC AAT GCT ATG TCT CAA CAT TGG TG
	43	D2-NS4B-NS5 F	CAC CAA TGT TGA GAC ATA GCA TTG AAA ATT CC
	44	D2-NS4B-NS5 R	CTG TCA TTG CCA TCT GTG TCA CCA TGG G
	45	D2-NS5-3’UTR F	CCC ATG GTG ACA CAG ATG GCA ATG ACA G
	46	D2-NS5-3’UTR R	GAT GCC ATG CCG ACC CAG AAC CTG TTG ATT CAA CAG CAC C
	47	D4-CMV-5’UTR-Env F	AGA GCT CGT TTA GTG AAC CGA GTT GTT AGT CTG TGT GGA
	48	D4-CMV-5’UTR-Env R	GCT GTT TCA CCT AGA ATG GCC ATT CGT TTT GCA CCT
	49	D4-Env-NS1-NS2A F	AGG TGC AAA ACG AAT GGC CAT TCT AGG TGA AAC AGC
	50	D4-Env-NS1-NS2A R	CTT CTC CTC AAG CAT TCT TCC ACA AAC AAG GTC AGG C
	51	D4-NS2A-NS2B-NS3 F	GCC TGA CCT TGT TTG TGG AAG AAT GCT TGA GGA GAA G
	52	D4-NS2A-NS2B-NS3 R	GTT ACT GCT CCA ATT TCT CCA GTT AGG GTC TTG AAA A
	53	D4-NS3-NS4A-NS4B F	TTT TCA AGA CCC TAA CTG GAG AAA TTG GAG CAG TAA C
	54	D4-NS3-NS4A-NS4B R	GAC GTG TTT TCT ATG GTG TGT CTC AGC ATG GGA
	55	D4-NS4B-NS5 F	TCC CAT GCT GAG ACA CAC CAT AGA AAA CAC GTC
	56	D4-NS4B-NS5 R	GAA CAC TCT TTG TTG CCC AAA AGG GGT TGT GTC
	57	D4-NS5-3’UTR F	GAC ACA ACC CCT TTT GGG CAA CAA AGA GTG TTC
	58	D4-NS5-3’UTR R	GAT GCC ATG CCG ACC CAG AAC CTG TTG GAT CAA CAA CAC
For RT-qPCR	63	DENV2 gRNA F	CAG GCT ATG GCA CTG TCA CGA T
	64	DENV2 gRNA R	CCA TTT GCA GCA ACA CCA TCT C
	65	DENV4 gRNA F	TTG TCC TGA TGA TGC TAG TCG
	66	DENV4 gRNA R	TCC ACC CGA GAC TCC TTC CA
	67	DENV4 3'UTR F	AAC AGC ATA TTG ACG CTG GGA
	68	DENV4 3'UTR R	GTG CCT GGA TTG ATG TTG CAG
	69	SDHA F	TGG GAA CAA GAG GGC ATC TG
	70	SDHA R	CCA CCA CTG CAT CAA ATT CAT G
	71	HPRT1 F	TGA CAC TGG CAA AAC AAT GCA
	72	HPRT1 R	GGT CCT TTT CAC CAG CAA GCT
	73	F Luc F	CGG AAA GAC GAT GAC GGA AA
	74	F Luc R	CGG TAC TTC GTC CAC AAA CA
	75	R Luc F	CAG TGG TGG GCC AGA TGT AAA CAA
	76	R Luc R	TAA GAA GAG GCC GCG TTA CCA TGT
	77	18S F	GTA ACC CGT TGA ACC CCA TT
	78	18S R	CCA TCC AAT CGG TAG TAG CG
	79	U1 F	GGG AGA TAC CAT GAT CAC GAA GGT
	80	U1 R	ATG CAG TCG AGT TTC CCA CA
	81	hnRNPA1 F	ACA GTC TGA TCG TGA CGC TG
	82	hnRNPA1 R	GAA CCT GGC ATC ACC CTG AA
	83	CTNNB1 F	GAA ACA GCT CGT TGT ACC GC
	84	CTNNB1 R	CCA AGC ATT TTC ACC AGG GC
	85	qSF3B1 F	ATCGCCAAGACTCACGAAGA
	86	qSF3B1 R	AACCTGTAGAATCGAGGCCC
